# Supplementary material
Source: publisher site journal article supplement (https://www.spandidos-publications.com/6054/downloadSupplementary)
Supplement: Supplementary file 1 [file downloadSupplementary]

## Sheet: gene_expression
Table SΙ. Complete dataset of the raw count values and FPKM values from RNA sequencing.
gene_id	gene_name	description	locus	Con-1_FPKM	Con-2_FPKM	Con-3_FPKM	IM-1_FPKM	IM-2_FPKM	IM-3_FPKM	IM-CX-1_FPKM	IM-CX-2_FPKM	IMCX3_FPKM	Con-1_count	Con-2_count	Con-3_count	IM-1_count	IM-2_count	IM-3_count	IM-CX-1_count	IM-CX-2_count	IMCX3_count
ENSG00000282222	RP11-126O22.8	-	X:9410789-9411545	0	0	0	0	0	0	0	0	0	0	0	0	0	0	0	0	0	0
ENSG00000282221	RP11-27G14.4	-	1:201399633-201401190	0	0	0	0	0	0	0	0	0	0	0	0	0	0	0	0	0	0
ENSG00000110514	MADD	MAP-kinase activating death domain [Source:HGNC Symbol;Acc:HGNC:6766]	11:47269161-47330031	8.36952	8.17513	9.1638	8.24774	8.64069	8.12075	7.69572	7.90728	7.36548	2440	2722	2783	2608	2894	2340	2173	2214	2061
ENSG00000086015	MAST2	microtubule associated serine/threonine kinase 2 [Source:HGNC Symbol;Acc:HGNC:19035]	1:45786987-46036124	9.53269	9.71647	10.4142	10.6344	10.2079	10.0523	10.2317	9.54619	9.62813	2224	2589	2531	2691	2736	2318	2312	2139	2156
ENSG00000115808	STRN	striatin [Source:HGNC Symbol;Acc:HGNC:11424]	2:36843640-36966472	13.1953	16.5841	15.8438	15.0228	15.3372	16.0757	17.0298	16.259	15.6992	2508	3600	3137	3097	3349	3020	3135	2968	2864
ENSG00000250337	LINC01021	long intergenic non-protein coding RNA 1021 [Source:HGNC Symbol;Acc:HGNC:48995]	5:27472292-27496401	3.75732	2.34462	2.83974	4.30431	4.91798	2.85107	2.60553	2.59838	2.5562	268	191	211	333	403	201	180	178	175
ENSG00000169740	ZNF32	zinc finger protein 32 [Source:HGNC Symbol;Acc:HGNC:13095]	10:43643859-43648856	4.84157	3.89378	3.71816	4.19925	3.60558	3.91874	3.59173	3.45408	4.25961	270	248	216	254	231	216	194	185	228
ENSG00000215869	RP11-364B6.2	-	1:104072983-104226678	0.0170133	0.0372328	0	0.00784033	0.00740125	0.0344246	0.0263469	0.00885689	0.0886185	2	5	0	1	1	4	3	1	10
ENSG00000261609	GAN	gigaxonin [Source:HGNC Symbol;Acc:HGNC:4137]	16:81314952-81390884	3.19164	3.32851	3.35507	2.99968	2.91556	3.16648	3.16105	2.88481	3.00597	1031	1228	1129	1051	1082	1011	989	895	932
ENSG00000169744	LDB2	LIM domain binding 2 [Source:HGNC Symbol;Acc:HGNC:6533]	4:16501541-16898809	0.00804704	0	0	0	0	0	0.00415391	0	0	2	0	0	0	0	0	1	0	0
ENSG00000261607	RP11-812E19.5	-	16:33948278-33948548	0	0	0	0	0	0	0	0	0	0	0	0	0	0	0	0	0	0
ENSG00000261606	RP11-414J4.2	-	15:74816223-74831795	0.0148177	0	0	0	0	0	0	0	0	3	0	0	0	0	0	0	0	0
ENSG00000215866	LINC01356	long intergenic non-protein coding RNA 1356 [Source:HGNC Symbol;Acc:HGNC:50587]	1:112820170-112850643	0	0	0	0	0	0.0181325	0.0555249	0	0	0	0	0	0	0	1	3	0	0
ENSG00000261604	CTD-2636A23.2	-	5:43287601-43290839	0	0	0	0	0	0	0	0	0	0	0	0	0	0	0	0	0	0
ENSG00000261603	PRSS46	protease, serine 46 [Source:HGNC Symbol;Acc:HGNC:37325]	3:46719583-46736429	0	0	0	0	0	0	0	0	0	0	0	0	0	0	0	0	0	0
ENSG00000261602	CTD-2033A16.1	-	16:69709874-69710583	0	0	0	0	0	0	0	0	0	0	0	0	0	0	0	0	0	0
ENSG00000261600	RP11-575H3.1	-	2:91580336-91580863	0.0906439	0	0	0	0	0	0	0	0	1	0	0	0	0	0	0	0	0
ENSG00000266469	CTB-131K11.1	-	17:39401793-39406233	0.612385	0.536192	0.694732	1.18056	0.77534	0.732223	0.747226	0.463713	0.580039	11	11	13	23	16	13	13	8	10
ENSG00000168298	HIST1H1E	histone cluster 1, H1e [Source:HGNC Symbol;Acc:HGNC:4718]	6:26156354-26157107	4.00037	4.61461	3.04779	4.39077	3.15047	3.72617	3.93361	3.76858	3.70476	63	83	50	75	57	58	60	57	56
ENSG00000168297	PXK	PX domain containing serine/threonine kinase [Source:HGNC Symbol;Acc:HGNC:23326]	3:58332880-58426126	2.40776	2.60101	2.47269	2.73161	2.56193	2.48349	2.44156	2.60467	2.4312	616	760	659	758	753	628	605	640	597
ENSG00000266460	RP11-173L6.1	-	18:75844925-75868252	0	0	0	0	0	0	0	0	0	0	0	0	0	0	0	0	0	0
ENSG00000266466	RP11-822E23.2	-	17:21532974-21542786	0	0	0	0	0	0	0	0	0	0	0	0	0	0	0	0	0	0
ENSG00000266467	RN7SL220P	RNA, 7SL, cytoplasmic 220, pseudogene [Source:HGNC Symbol;Acc:HGNC:46236]	10:68007718-68008017	0	0	0	0	0	0	0	0	0	0	0	0	0	0	0	0	0	0
ENSG00000168291	PDHB	pyruvate dehydrogenase (lipoamide) beta [Source:HGNC Symbol;Acc:HGNC:8808]	3:58427630-58433857	3.11556	2.89151	4.19699	4.10411	3.69584	3.25138	3.83886	3.24395	3.34333	667	707	936	953	909	688	796	667	687
ENSG00000262558	RP11-1260E13.3	-	17:354737-356882	0	0	0	0	0	0	0	0	0	0	0	0	0	0	0	0	0	0
ENSG00000270591	RP11-73M18.11	-	14:103762803-103763277	0	0.0671742	0	0	0	0	0	0	0	0	1	0	0	0	0	0	0	0
ENSG00000262554	LA16c-360H6.2	-	16:3308609-3308816	0.230096	0.201523	0.22089	0.212179	0.200296	0.232845	0.237671	0.23969	0.239799	1	1	1	1	1	1	1	1	1
ENSG00000254141	RP11-642D21.1	-	8:105669991-105679031	0.401195	0.468401	0.641883	0.739784	0.814843	0.676559	0.552285	0.208892	0.417974	6	8	10	12	14	10	8	3	6
ENSG00000225108	ZBTB45P1	zinc finger and BTB domain containing 45 pseudogene 1 [Source:HGNC Symbol;Acc:HGNC:49227]	2:109986939-109988394	0	0	0	0	0	0	0	0	0	0	0	0	0	0	0	0	0	0
ENSG00000281046	Metazoa_SRP	Metazoan signal recognition particle RNA [Source:RFAM;Acc:RF00017]	2:223857154-223857425	0	0	0	0	0	0	0	0	0	0	0	0	0	0	0	0	0	0
ENSG00000270593	RP11-455J15.1	-	7:16849957-16850725	0	0	0	0	0	0	0	0	0	0	0	0	0	0	0	0	0	0
ENSG00000225100	DPY19L2P5	DPY19L2 pseudogene 5 [Source:HGNC Symbol;Acc:HGNC:51620]	10:79982910-79983240	0	0	0	0	0	0	0	0	0	0	0	0	0	0	0	0	0	0
ENSG00000225101	OR52K3P	olfactory receptor family 52 subfamily K member 3 pseudogene [Source:HGNC Symbol;Acc:HGNC:15224]	11:4474813-4475755	0	0	0	0.0468009	0	0	0	0.105738	0	0	0	0	1	0	0	0	2	0
ENSG00000225102	RP11-456H18.1	-	6:11990343-11992012	0	0	0	0	0	0	0	0	0	0	0	0	0	0	0	0	0	0
ENSG00000233579	KRT8P15	keratin 8 pseudogene 15 [Source:HGNC Symbol;Acc:HGNC:33367]	2:202840331-202841781	0	0.0288881	0	0	0	0	0	0	0	0	1	0	0	0	0	0	0	0
ENSG00000225105	LINC01076	long intergenic non-protein coding RNA 1076 [Source:HGNC Symbol;Acc:HGNC:49119]	13:25193107-25210295	0	0	0	0	0	0	0	0	0	0	0	0	0	0	0	0	0	0
ENSG00000225106	RP11-429E11.2	-	20:61738219-61755056	0	0	0	0	0	0	0	0	0	0	0	0	0	0	0	0	0	0
ENSG00000225107	AC092484.1	-	2:145569294-145588024	0.402357	0.201281	0.22068	0.105962	0.200105	0.174424	0.415426	0.119701	0.299389	7	4	4	2	4	3	7	2	5
ENSG00000226457	RP11-430L17.1	-	1:16369150-16369530	1.25667	0.990267	0.965087	1.04275	0.87511	0.635717	1.29739	1.0467	1.44019	10	9	8	9	8	5	10	8	11
ENSG00000226455	RP3-512E2.2	-	6:89950116-89953186	0	0	0	0	0	0	0	0	0	0	0	0	0	0	0	0	0	0
ENSG00000226454	RP3-462C17.1	-	6:40516336-40523933	0	0	0	0	0	0	0	0	0	0	0	0	0	0	0	0	0	0
ENSG00000149792	MRPL49	mitochondrial ribosomal protein L49 [Source:HGNC Symbol;Acc:HGNC:1176]	11:65122183-65127371	10.5064	7.3684	9.74895	10.0791	8.59148	2.47524	10.2053	9.13729	2.39786	2246	1799	2171	2337	2110	523	2113	1876	492
ENSG00000226450	CYP2D8P	ccytochrome P450 family 2 subfamily D member 8, pseudogene [Source:HGNC Symbol;Acc:HGNC:2628]	22:42149886-42155001	0.0642737	0.225084	0.215911	0.207366	0.279691	0.0975137	0.232248	0.1673	0.0669507	2	8	7	7	10	3	7	5	2
ENSG00000141854	CTB-55O6.8	Uncharacterized protein LOC113230 [Source:UniProtKB/Swiss-Prot;Acc:Q96FF7]	19:14072536-14075062	0.579834	0.551211	0.373729	0.511677	0.50471	0.444174	0.367748	0.68998	0.526441	70	76	47	67	70	53	43	80	61
ENSG00000149798	CDC42EP2	CDC42 effector protein (Rho GTPase binding) 2 [Source:HGNC Symbol;Acc:HGNC:16263]	11:65314818-65322429	2.78392	2.0313	2.06001	2.51322	2.48635	2.42052	2.54498	2.41554	2.09983	192	160	148	188	197	165	170	160	139
ENSG00000183055	FAM133CP	family with sequence similarity 133 member C, pseudogene [Source:HGNC Symbol;Acc:HGNC:44190]	10:58715554-58716257	0.61205	0.89317	0.587561	1.37941	1.59835	1.30732	1.33413	0.920554	0.63772	9	15	9	22	27	19	19	13	9
ENSG00000183054	RGPD6	RANBP2-like and GRIP domain containing 6 [Source:HGNC Symbol;Acc:HGNC:32419]	2:110513812-110577185	0.0890065	0.0897415	0.080266	0.082063	0.0751273	0.0791374	0.125314	0.0842494	0.0843023	33	38	31	33	32	29	45	30	30
ENSG00000251079	BMS1P2	BMS1, ribosome biogenesis factor pseudogene 2 [Source:HGNC Symbol;Acc:HGNC:23650]	10:47538377-47551954	0.102789	0.323995	0.197333	0.379063	0.411553	0.35358	0.254692	0.235448	0.0642485	5	18	10	20	23	17	12	11	3
ENSG00000251078	SLC25A5P9	solute carrier family 25 (mitochondrial carrier; adenine nucleotide translocator), member 5 pseudogene 9 [Source:HGNC Symbol;Acc:HGNC:35468]	5:75752570-75753479	0	0	0	0	0	0	0	0	0	0	0	0	0	0	0	0	0	0
ENSG00000250566	UGT2B29P	UDP glucuronosyltransferase 2 family, polypeptide B29 pseudogene [Source:HGNC Symbol;Acc:HGNC:12552]	4:68509441-68517647	0	0	0	0	0	0	0	0	0	0	0	0	0	0	0	0	0	0
ENSG00000259244	RP11-182J1.12	-	15:84513241-84526949	2.53016	3.323	2.89594	3.85797	3.04933	3.24897	1.20565	3.34366	2.23053	26	39	31	43	36	33	12	33	22
ENSG00000250564	RP11-215P8.4	-	5:134429051-134460615	0	0	0	0.131938	0	0	0.14779	0	0	0	0	0	2	0	0	2	0	0
ENSG00000250565	ATP6V1E2	ATPase, H+ transporting, lysosomal 31kDa, V1 subunit E2 [Source:HGNC Symbol;Acc:HGNC:18125]	2:46490750-46542557	0.779046	0.711519	0.805872	0.996891	1.07563	0.794986	0.915291	0.951008	0.902624	116	121	125	161	184	117	132	136	129
ENSG00000250562	RPL38P4	ribosomal protein L38 pseudogene 4 [Source:HGNC Symbol;Acc:HGNC:48867]	3:98525061-98525274	0	0	0.214697	0	0	0	0	0	0	0	0	1	0	0	0	0	0	0
ENSG00000250563	KNOP1P5	lysine-rich nucleolar protein 1 pseudogene 5 [Source:HGNC Symbol;Acc:HGNC:48923]	8:126072587-126074231	0	0.0304185	0	0	0	0	0	0	0	0	1	0	0	0	0	0	0	0
ENSG00000187961	KLHL17	kelch like family member 17 [Source:HGNC Symbol;Acc:HGNC:24023]	1:960587-965715	14.8982	13.6589	13.6937	12.1341	13.0499	14.2593	11.3796	12.4204	12.6868	1741	1823	1667	1538	1752	1647	1288	1394	1423
ENSG00000250561	OR7E59P	olfactory receptor family 7 subfamily E member 59 pseudogene [Source:HGNC Symbol;Acc:HGNC:8434]	7:6879627-6880626	0	0	0	0	0	0	0	0	0	0	0	0	0	0	0	0	0	0
ENSG00000250568	RP11-333E13.2	-	4:39973128-39973442	0.911923	0.266138	0.437718	0.700665	0.793817	0.307504	0.627754	0.316542	0.158344	6	2	3	5	6	2	4	2	1
ENSG00000250569	NTAN1P2	N-terminal asparagine amidase pseudogene 2 [Source:HGNC Symbol;Acc:HGNC:45262]	8:86481754-86483002	0.305591	0.222961	0.293364	0.328698	0.576347	0.463761	0.473267	0.583361	0.26531	6	5	6	7	13	9	9	11	5
ENSG00000281591	DBET	D4Z4 binding element transcript (non-protein coding) [Source:HGNC Symbol;Acc:HGNC:43904]	4:190064502-190067864	0	0.0124641	0.0136619	0	0	0	0	0.0148247	0	0	1	1	0	0	0	0	1	0
ENSG00000220685	RP11-530A18.1	-	6:5065795-5066982	0.967231	0.352869	0.232123	0.185782	0.315723	0.366949	0.291288	0.713335	0.419893	24	10	6	5	9	9	7	17	10
ENSG00000162843	WDR64	WD repeat domain 64 [Source:HGNC Symbol;Acc:HGNC:26570]	1:241652278-241802133	0.00678288	0.0118811	0.0130295	0.00625471	0.0354382	0.0137278	0.0140124	0.0141314	0.0212068	1	2	2	1	6	2	2	2	3
ENSG00000259247	TTTY25P	testis-specific transcript, Y-linked 25, pseudogene [Source:HGNC Symbol;Acc:HGNC:38524]	Y:22330452-22332500	0	0	0	0	0	0	0	0	0	0	0	0	0	0	0	0	0	0
ENSG00000162849	KIF26B	kinesin family member 26B [Source:HGNC Symbol;Acc:HGNC:25484]	1:245154985-245709431	0	0	0	0.00257457	0.0121567	0	0	0	0.00290971	0	0	0	1	5	0	0	0	1
ENSG00000149243	KLHL35	kelch like family member 35 [Source:HGNC Symbol;Acc:HGNC:26597]	11:75422394-75430629	0	0	0.0235644	0.0226351	0.0106864	0	0	0	0	0	0	4	4	2	0	0	0	0
ENSG00000184702	SEPT5	septin 5 [Source:HGNC Symbol;Acc:HGNC:9164]	22:19714464-19724772	13.3083	11.7831	12.2899	13.0916	12.6513	12.467	12.0989	11.474	11.2235	3658	3699	3519	3903	3995	3387	3221	3029	2961
ENSG00000259242	AC002306.1	-	19:19606350-19608660	0	0	0	0	0	0	0	0	0	0	0	0	0	0	0	0	0	0
ENSG00000184708	EIF4ENIF1	eukaryotic translation initiation factor 4E nuclear import factor 1 [Source:HGNC Symbol;Acc:HGNC:16687]	22:31436977-31496108	1.98396	1.92501	1.85827	2.45098	2.03189	2.25096	1.93082	2.31652	2.01227	453	502	442	607	533	508	427	508	441
ENSG00000184709	LRRC26	leucine rich repeat containing 26 [Source:HGNC Symbol;Acc:HGNC:31409]	9:137168758-137170051	0.118799	0	0.114046	0	0	0	0.0408897	0	0.247535	3	0	3	0	0	0	1	0	6
ENSG00000163462	TRIM46	tripartite motif containing 46 [Source:HGNC Symbol;Acc:HGNC:19019]	1:155173787-155184971	0.0558748	0.107626	0.0268196	0.113328	0.116724	0.0678352	0.0634546	0.116351	0.0756761	10	22	5	22	24	12	11	20	13
ENSG00000163463	KRTCAP2	keratinocyte associated protein 2 [Source:HGNC Symbol;Acc:HGNC:28942]	1:155169408-155173475	10.8394	8.4993	9.38848	10.2041	9.47479	9.26669	8.52318	8.88054	8.96225	1187	1063	1071	1212	1192	1003	904	934	942
ENSG00000163464	CXCR1	chemokine (C-X-C motif) receptor 1 [Source:HGNC Symbol;Acc:HGNC:6026]	2:218162845-218166995	0	0	0	0	0	0	0.0397393	0.0601151	0	0	0	0	0	0	0	2	3	0
ENSG00000163466	ARPC2	actin related protein 2/3 complex subunit 2 [Source:HGNC Symbol;Acc:HGNC:705]	2:218217094-218254356	7.45758	8.18588	8.26258	7.60363	8.09629	8.20353	6.62027	7.94108	7.49861	1719	2155	1984	1901	2144	1869	1478	1758	1659
ENSG00000163467	TSACC	TSSK6 activating co-chaperone [Source:HGNC Symbol;Acc:HGNC:30636]	1:156337314-156346995	0.30214	0.229263	0.328709	0.204271	0.245447	0.244543	0.270347	0.272642	0.251826	15	13	17	11	14	12	13	13	12
ENSG00000163468	CCT3	chaperonin containing TCP1, subunit 3 (gamma) [Source:HGNC Symbol;Acc:HGNC:1616]	1:156308968-156367873	56.5718	53.7876	57.8842	56.5787	55.4261	55.1834	54.2983	54.1419	56.9591	8895	9659	9481	9649	10012	8576	8269	8176	8596
ENSG00000162599	NFIA	nuclear factor I/A [Source:HGNC Symbol;Acc:HGNC:7784]	1:60865259-61462793	1.64272	1.53234	1.41976	1.38585	1.54905	1.54252	1.56027	1.5567	1.47938	612	652	551	560	663	568	563	557	529
ENSG00000162598	C1orf87	chromosome 1 open reading frame 87 [Source:HGNC Symbol;Acc:HGNC:28547]	1:59987269-60073770	0	0	0	0	0	0	0	0	0	0	0	0	0	0	0	0	0	0
ENSG00000267731	RP11-147L13.8	-	17:68189884-68192802	0	0	0.01574	0	0	0	0.0169358	0	0.0170875	0	0	1	0	0	0	1	0	1
ENSG00000162592	CCDC27	coiled-coil domain containing 27 [Source:HGNC Symbol;Acc:HGNC:26546]	1:3752398-3771645	0	0	0	0.0128931	0	0.0141489	0	0	0	0	0	0	1	0	1	0	0	0
ENSG00000029364	SLC39A9	solute carrier family 39 member 9 [Source:HGNC Symbol;Acc:HGNC:20182]	14:69398015-69462388	6.70721	4.49024	5.72891	6.32826	5.33649	5.8668	3.97517	6.02463	4.85343	2141	1637	1905	2191	1957	1851	1229	1847	1487
ENSG00000267732	RP11-456O19.3	-	18:56138612-56143221	0	0	0	0	0	0	0	0	0	0	0	0	0	0	0	0	0	0
ENSG00000267735	CTD-2265O21.7	-	19:12880969-12884088	0	0	0	0	0	0	0	0	0	0	0	0	0	0	0	0	0	0
ENSG00000029363	BCLAF1	BCL2-associated transcription factor 1 [Source:HGNC Symbol;Acc:HGNC:16863]	6:136256863-136289851	6.2626	6.382	6.40374	5.77738	6.02666	6.58813	6.72507	8.19375	6.59113	3344	3892	3562	3346	3697	3477	3478	4202	3378
ENSG00000267737	AC061992.2	-	17:78315729-78347798	0	0.0581369	0	0	0	0	0	0	0	0	2	0	0	0	0	0	0	0
ENSG00000162594	IL23R	interleukin 23 receptor [Source:HGNC Symbol;Acc:HGNC:19100]	1:67166400-67259979	8.50012	10.1966	9.94986	9.88065	9.95422	10.57	12.5804	12.2112	11.9536	1135	1555	1384	1431	1527	1395	1627	1566	1532
ENSG00000263609	RP11-1109M24.16	-	17:22234328-22266362	0.0192132	0	0	0	0	0	0	0	0	1	0	0	0	0	0	0	0	0
ENSG00000263608	RN7SL353P	RNA, 7SL, cytoplasmic 353, pseudogene [Source:HGNC Symbol;Acc:HGNC:46369]	6:30751038-30751289	0	0	0	0	0	0	0	0	0	0	0	0	0	0	0	0	0	0
ENSG00000118640	VAMP8	vesicle associated membrane protein 8 [Source:HGNC Symbol;Acc:HGNC:12647]	2:85561562-85582031	48.1385	45.3452	42.519	43	41.618	36.9317	39.371	43.4031	40.4423	1477	1589	1359	1431	1467	1120	1170	1279	1191
ENSG00000263603	CTD-2349P21.5	-	17:30729469-30731202	0.207269	0.145166	0.238755	0.535061	0.360814	0.251636	0.38517	0.517935	0.475075	5	4	6	14	10	6	9	12	11
ENSG00000168488	ATXN2L	ataxin 2-like [Source:HGNC Symbol;Acc:HGNC:31326]	16:28823035-28837237	16.0695	15.2744	18.6513	16.6911	16.1878	18.5022	16.7702	14.8459	16.6821	6122	6646	7402	6897	7085	6967	6188	5432	6100
ENSG00000263606	RP11-737O24.3	-	18:2945550-2946890	0.191589	0.242312	0.572198	0.451437	0.222368	0.387692	0.285733	0.265991	0.399226	9	13	28	23	12	18	13	12	18
ENSG00000259169	GNRHR2P1	GNRHR2 pseudogene 1 [Source:HGNC Symbol;Acc:HGNC:39424]	14:60398934-60400013	0	0	0	0	0	0	0	0	0	0	0	0	0	0	0	0	0	0
ENSG00000253144	RP11-281O15.7	-	5:179082680-179083194	0.092932	0.162783	0.0892137	0.0856955	0.0808964	0.0940423	0.0959916	0.0968067	0.096851	1	2	1	1	1	1	1	1	1
ENSG00000253147	RP11-369E15.4	-	8:20953127-20968904	0	0	0	0	0	0	0	0	0	0	0	0	0	0	0	0	0	0
ENSG00000253146	CIR1P1	corepressor interacting with RBPJ, 1 pseudogene 1 [Source:HGNC Symbol;Acc:HGNC:44011]	5:154559308-154560440	0	0	0	0	0	0	0	0	0	0	0	0	0	0	0	0	0	0
ENSG00000253141	CTB-164N12.1	-	5:173463500-173484584	0	0	0	0	0	0	0	0	0	0	0	0	0	0	0	0	0	0
ENSG00000115073	ACTR1B	ARP1 actin-related protein 1 homolog B, centractin beta (yeast) [Source:HGNC Symbol;Acc:HGNC:168]	2:97655963-97664107	13.852	10.9925	12.2838	13.8031	13.9506	12.7406	11.4126	12.1184	11.2911	1089	987	1006	1177	1260	990	869	915	852
ENSG00000253143	RP11-333A23.3	-	8:70471112-70480623	0	0	0	0	0	0	0	0	0	0	0	0	0	0	0	0	0	0
ENSG00000253142	RP11-87E22.1	-	8:22895434-22897813	0	0	0	0	0	0	0	0	0	0	0	0	0	0	0	0	0	0
ENSG00000259161	CTD-2017C7.3	-	14:101843394-101844122	0	0	0	0	0	0	0	0	0	0	0	0	0	0	0	0	0	0
ENSG00000259163	RP11-1078H9.5	-	14:90642638-90648894	0	0	0	0	0	0	0	0	0	0	0	0	0	0	0	0	0	0
ENSG00000259162	RP11-203M5.6	-	14:20437982-20441268	0	0	0	0.0354769	0.167517	0	0.0397393	0.0801534	0.0400951	0	0	0	1	5	0	1	2	1
ENSG00000259165	DDX18P1	DEAD (Asp-Glu-Ala-Asp) box polypeptide 18 pseudogene 1 [Source:HGNC Symbol;Acc:HGNC:20007]	14:69083398-69085389	0	0	0	0	0	0	0	0	0	0	0	0	0	0	0	0	0	0
ENSG00000259164	RP11-463C8.4	-	14:77098311-77225462	0	0	0	0	0	0	0	0	0	0	0	0	0	0	0	0	0	0
ENSG00000259167	NMNAT1P1	NMNAT1 pseudogene 1 [Source:HGNC Symbol;Acc:HGNC:20024]	14:81032529-81033404	0	0	0	0	0	0	0	0	0	0	0	0	0	0	0	0	0	0
ENSG00000259166	RP11-1029J19.2	-	14:101447642-101457117	0	0	0	0	0	0	0	0	0	0	0	0	0	0	0	0	0	0
ENSG00000213853	EMP2	epithelial membrane protein 2 [Source:HGNC Symbol;Acc:HGNC:3334]	16:10528422-10580698	0.839322	0.534054	0.600532	0.605605	0.721505	0.690946	0.538248	0.792491	0.564868	161	117	120	126	159	131	100	146	104
ENSG00000213851	RP11-324J13.1	-	4:43410041-43410937	0	0	0.0512208	0.0492009	0.0464455	0	0	0	0	0	0	1	1	1	0	0	0	0
ENSG00000258590	NBEAP1	neurobeachin pseudogene 1 [Source:HGNC Symbol;Acc:HGNC:1007]	15:20657638-20688408	0.099616	0.0872237	0.0478091	0.0918473	0.0650331	0.125986	0.128558	0.0648315	0.0778335	8	8	4	8	6	10	10	5	6
ENSG00000213857	RP11-12M9.4	-	22:41074180-41075239	0	0	0	0	0	0	0	0	0	0	0	0	0	0	0	0	0	0
ENSG00000213856	VDAC1P2	voltage-dependent anion channel 1 pseudogene 2 [Source:HGNC Symbol;Acc:HGNC:12670]	X:49632500-49633349	15.8278	17.2615	16.4377	14.9044	16.817	15.1588	17.0978	15.2485	14.6713	281	350	304	287	343	266	294	260	250
ENSG00000213854	CNN2P6	calponin 2 pseudogene 6 [Source:HGNC Symbol;Acc:HGNC:39531]	3:31181751-31182650	0	0	0	0	0	0.0538131	0	0	0	0	0	0	0	0	1	0	0	0
ENSG00000213859	KCTD11	potassium channel tetramerization domain containing 11 [Source:HGNC Symbol;Acc:HGNC:21302]	17:7351889-7354944	1.98862	1.64514	1.76417	1.87138	1.69516	1.67895	1.60008	1.71358	1.929	145	137	134	148	142	121	113	120	135
ENSG00000178773	CPNE7	copine VII [Source:HGNC Symbol;Acc:HGNC:2320]	16:89575768-89597246	11.749	11.5239	11.4945	12.7565	13.8211	14.0532	11.0438	13.7694	13.9374	1306	1463	1331	1538	1765	1544	1189	1470	1487
ENSG00000225816	GTF3AP5	general transcription factor IIIA pseudogene 5 [Source:HGNC Symbol;Acc:HGNC:49748]	7:14985378-14986074	0	0	0	0	0	0	0	0	0	0	0	0	0	0	0	0	0	0
ENSG00000280881	RP11-275E15.2	-	15:21328380-21343881	0	0	0	0	0	0	0	0	0	0	0	0	0	0	0	0	0	0
ENSG00000225814	GRPEL2P2	GrpE-like 2, mitochondrial (E. coli) pseudogene 2 [Source:HGNC Symbol;Acc:HGNC:41970]	X:64697878-64698547	0	0	0	0	0	0	0	0	0	0	0	0	0	0	0	0	0	0
ENSG00000225815	AC092669.6	-	2:66327349-66328984	0	0	0	0	0	0	0	0	0	0	0	0	0	0	0	0	0	0
ENSG00000225813	AC009299.4	-	2:161281902-161282618	0.66777	0.58467	0.897434	0.615647	1.10435	0.878259	0.965202	0.556197	1.25224	10	10	14	10	19	13	14	8	18
ENSG00000225811	RP11-547I7.1	-	1:190264898-190362270	0	0	0	0	0	0	0	0	0	0	0	0	0	0	0	0	0	0
ENSG00000225818	AC118653.2	-	17:71596338-71597279	0	0	0	0	0	0	0	0	0	0	0	0	0	0	0	0	0	0
ENSG00000225819	AC013269.3	-	2:130515997-130526691	0	0	0	0	0	0	0	0	0	0	0	0	0	0	0	0	0	0
ENSG00000229306	AP001464.4	-	21:12999676-13016692	0	0	0	0	0	0	0	0	0	0	0	0	0	0	0	0	0	0
ENSG00000229307	LINC00459	long intergenic non-protein coding RNA 459 [Source:HGNC Symbol;Acc:HGNC:42808]	13:62323657-62328833	0	0	0	0	0	0	0	0	0	0	0	0	0	0	0	0	0	0
ENSG00000229305	RP11-431K24.2	-	1:8189824-8192770	0	0.0389923	0	0	0	0	0	0	0	0	1	0	0	0	0	0	0	0
ENSG00000229302	TAF9P2	TATA-box binding protein associated factor 9 pseudogene 2 [Source:HGNC Symbol;Acc:HGNC:31744]	Y:18276607-18277495	0	0	0	0	0	0	0	0	0	0	0	0	0	0	0	0	0	0
ENSG00000229303	PPIAP25	peptidylprolyl isomerase A (cyclophilin A) pseudogene 25 [Source:HGNC Symbol;Acc:HGNC:39270]	13:45436121-45436660	0	0	0	0	0	0	0	0	0	0	0	0	0	0	0	0	0	0
ENSG00000229301	RP5-905H7.8	-	7:63354457-63359306	0	0	0	0	0	0	0	0	0	0	0	0	0	0	0	0	0	0
ENSG00000269911	RP1-172N19.5	-	X:72777608-72779097	0	0	0	0	0	0	0	0	0	0	0	0	0	0	0	0	0	0
ENSG00000229308	AC010084.1	-	Y:4036497-4100320	0	0	0	0	0	0	0	0	0	0	0	0	0	0	0	0	0	0
ENSG00000229309	RP11-452B18.2	-	13:81250438-81302407	0	0	0	0	0	0	0	0	0	0	0	0	0	0	0	0	0	0
ENSG00000278071	RP11-736N17.10	-	14:103208100-103208876	0.677801	1.13299	0.887265	1.42027	0.697254	1.12216	1.27241	0.962395	0.898773	11	21	15	25	13	18	20	15	14
ENSG00000240174	RP11-851M3.1	-	11:84639993-84640565	0.0835253	0.073153	0.0801833	0.0770213	0.0727079	0.0845232	0.0862751	0.0870077	0.0870476	1	1	1	1	1	1	1	1	1
ENSG00000278077	RP11-157L3.10	-	9:41644771-41644981	0.226825	0.794629	0.435716	0.209162	0.592541	0.229535	0.234292	0.945127	0.94556	1	4	2	1	3	1	1	4	4
ENSG00000278075	RP11-248M19.1	-	18:79900555-79900903	0.411541	0.120105	0.131648	0	0.358241	0.138773	0.141649	0.142852	0	3	1	1	0	3	1	1	1	0
ENSG00000055070	SZRD1	SUZ RNA binding domain containing 1 [Source:HGNC Symbol;Acc:HGNC:30232]	1:16352575-16398145	8.7291	21.0721	22.2684	22.968	21.8858	22.1984	21.4487	6.89531	9.00106	1848	5095	4911	5274	5323	4645	4398	1402	1829
ENSG00000227411	BAATP1	bile acid-CoA: amino acid N-acyltransferase pseudogene 1 [Source:HGNC Symbol;Acc:HGNC:34504]	9:101334084-101339347	0	0	0	0	0	0	0	0	0	0	0	0	0	0	0	0	0	0
ENSG00000155719	OTOA	otoancorin [Source:HGNC Symbol;Acc:HGNC:16378]	16:21678514-21760729	0	0	0	0	0.004604	0	0	0	0	0	0	0	0	1	0	0	0	0
ENSG00000227413	RP5-1042K10.12	-	22:40433136-40433641	0	0	0	0	0	0	0	0	0	0	0	0	0	0	0	0	0	0
ENSG00000227416	RP11-109P14.2	-	1:37782457-37782885	0	0	0	0	0	0	0	0	0	0	0	0	0	0	0	0	0	0
ENSG00000227417	RP11-397P13.6	-	1:203805621-203806263	0	0	0	0	0	0	0	0	0	0	0	0	0	0	0	0	0	0
ENSG00000162337	LRP5	LDL receptor related protein 5 [Source:HGNC Symbol;Acc:HGNC:6697]	11:68312609-68449275	13.8024	14.8164	15.5369	16.319	14.9932	14.211	14.1034	14.1362	13.6684	2323	2848	2724	2979	2899	2364	2299	2285	2208
ENSG00000155714	PDZD9	PDZ domain containing 9 [Source:HGNC Symbol;Acc:HGNC:28740]	16:21983865-22001110	0	0	0	0.0624674	0	0	0	0	0	0	0	0	2	0	0	0	0	0
ENSG00000182010	RTKN2	rhotekin 2 [Source:HGNC Symbol;Acc:HGNC:19364]	10:62183035-62268707	0.501821	0.925694	0.991519	0.39978	0.597959	0.468282	0.75957	0.588448	0.776634	103	217	212	89	141	95	151	116	153
ENSG00000182013	PNMAL1	paraneoplastic Ma antigen family-like 1 [Source:HGNC Symbol;Acc:HGNC:25578]	19:46466491-46471563	7.31584	7.48647	8.07694	7.66148	7.7253	6.86928	7.78148	7.75262	7.60859	1126	1316	1295	1279	1366	1045	1160	1146	1124
ENSG00000244748	RN7SL153P	RNA, 7SL, cytoplasmic 153, pseudogene [Source:HGNC Symbol;Acc:HGNC:46169]	5:72314397-72314688	0.327972	0.14355	0	0.151141	0.142677	0.165862	0	0.170738	0	2	1	0	1	1	1	0	1	0
ENSG00000186704	DTX2P1	DTX2 pseudogene 1 [Source:HGNC Symbol;Acc:HGNC:42352]	7:76978617-77004308	2.84393	2.92649	2.39232	3.02748	2.39892	2.729	2.84547	2.47271	2.87135	97	114	85	112	94	92	94	81	94
ENSG00000251776	RN7SKP242	RNA, 7SK small nuclear pseudogene 242 [Source:HGNC Symbol;Acc:HGNC:45966]	9:83200940-83201228	0	0	0	0	0	0	0	0	0	0	0	0	0	0	0	0	0	0
ENSG00000245293	RP11-286E11.1	-	4:107863479-107978799	0	0.0364704	0.0399887	0.0255993	0.0362605	0.0561996	0.05735	0.0144592	0	0	3	3	2	3	4	4	1	0
ENSG00000164659	KIAA1324L	KIAA1324-like [Source:HGNC Symbol;Acc:HGNC:21945]	7:86876906-87059699	5.03614	5.93852	5.92739	5.09142	5.29707	5.36172	5.19132	5.19306	5.14146	1243	1674	1524	1363	1502	1308	1241	1231	1218
ENSG00000242748	RPL23AP81	ribosomal protein L23a pseudogene 81 [Source:HGNC Symbol;Acc:HGNC:36246]	20:41196691-41197157	0	0.0897574	0.0983834	0	0.267722	0.103708	0	0.106757	0.106806	0	1	1	0	3	1	0	1	1
ENSG00000242747	RP11-30K9.1	-	15:58869659-58870134	0	0	0	0	0.0875245	0.101747	0	0	0	0	0	0	0	1	1	0	0	0
ENSG00000164651	SP8	Sp8 transcription factor [Source:HGNC Symbol;Acc:HGNC:19196]	7:20782283-20786886	0.534998	0.567054	0.486544	0.510563	0.514704	0.408334	0.542678	0.361596	0.518281	57	69	54	59	63	43	56	37	53
ENSG00000242741	RP11-20B7.1	-	3:73808601-73902866	0.183667	0	0.117565	0	0.15988	0	0.126434	0.0637538	0	3	0	2	0	3	0	2	1	0
ENSG00000164654	MIOS	missing oocyte, meiosis regulator, homolog (Drosophila) [Source:HGNC Symbol;Acc:HGNC:21905]	7:7566872-7608929	2.94411	3.1452	3.12957	3.45567	2.64972	3.18508	2.87864	3.53192	2.70062	736	898	815	937	761	787	697	848	648
ENSG00000114978	MOB1A	MOB kinase activator 1A [Source:HGNC Symbol;Acc:HGNC:16015]	2:74152528-74178898	29.4	31.2386	30.8922	27.9732	28.6089	30.7688	31.998	30.8395	29.2439	4969	6030	5439	5128	5555	5140	5238	5006	4744
ENSG00000252233	RN7SKP253	RNA, 7SK small nuclear pseudogene 253 [Source:HGNC Symbol;Acc:HGNC:45977]	4:139794125-139794433	0	0	0	0	0	0	0	0	0	0	0	0	0	0	0	0	0	0
ENSG00000256925	ADGRA1-AS1	adhesion G protein-coupled receptor A1 antisense RNA 1 [Source:HGNC Symbol;Acc:HGNC:49543]	10:133083073-133088491	0	0	0	0	0	0	0	0	0	0	0	0	0	0	0	0	0	0
ENSG00000161021	MAML1	mastermind like transcriptional coactivator 1 [Source:HGNC Symbol;Acc:HGNC:13632]	5:179732850-179796511	4.72484	5.16048	5.98735	5.73912	5.81682	5.74382	5.42264	5.51959	5.77432	1156	1442	1526	1523	1635	1389	1285	1297	1356
ENSG00000256922	RP11-749H20.1	-	12:127793527-127821183	0	0	0	0	0	0.209661	0	0	0	0	0	0	0	0	2	0	0	0
ENSG00000256923	RP11-449P1.1	-	12:22742582-22743091	0.112877	0	0	0	0	0	0	0	0	1	0	0	0	0	0	0	0	0
ENSG00000226331	RPL23AP28	ribosomal protein L23a pseudogene 28 [Source:HGNC Symbol;Acc:HGNC:36727]	2:222044525-222044994	0	0	0	0	0	0	0	0	0	0	0	0	0	0	0	0	0	0
ENSG00000261608	SLC25A1P4	solute carrier family 25 (mitochondrial carrier; citrate transporter), member 1 pseudogene 4 [Source:HGNC Symbol;Acc:HGNC:43848]	16:35173316-35174093	0	0	0	0	0	0	0	0	0	0	0	0	0	0	0	0	0	0
ENSG00000256928	RP11-809N8.2	-	11:73395559-73396436	0	0	0	0	0	0	0	0	0	0	0	0	0	0	0	0	0	0
ENSG00000254694	RP11-50B3.4	-	11:126208611-126209027	0.661314	2.08449	1.26958	1.58525	0.921041	1.87332	0.819376	0.688611	1.24021	5	18	10	13	8	14	6	5	9
ENSG00000254695	RP11-396O20.1	-	11:15643885-15705368	0	0	0	0	0	0	0	0	0	0	0	0	0	0	0	0	0	0
ENSG00000254696	RP11-72M10.7	-	11:55282502-55282977	0	0	0	0	0	0	0	0	0	0	0	0	0	0	0	0	0	0
ENSG00000254697	COPS8P3	COP9 signalosome subunit 8 pseudogene 3 [Source:HGNC Symbol;Acc:HGNC:45271]	11:78581675-78582156	0	0	0	0	0	0	0.102564	0	0	0	0	0	0	0	0	1	0	0
ENSG00000254690	GS1-393G12.12	-	8:144314590-144315138	0.323486	0.283221	0.207063	0.198798	0.0938325	0.218161	0	0.449148	0.337015	3	3	2	2	1	2	0	4	3
ENSG00000254691	RP11-91P24.5	-	11:77850604-77851511	0	0	0	0	0	0	0	0.0904817	0	0	0	0	0	0	0	0	1	0
ENSG00000266929	RP11-400F19.8	-	17:42536510-42562062	0	0	0.154774	0.0742983	0.0701374	0.733898	0.16645	0	0	0	0	2	1	1	9	2	0	0
ENSG00000266928	CTB-70G10.1	-	19:28294093-28313500	0	0	0	0	0.217437	0.0842292	0	0.0867051	0	0	0	0	0	3	1	0	1	0
ENSG00000266925	RP11-434D2.7	-	17:20507413-20508931	0	0	0	0	0	0	0	0	0	0	0	0	0	0	0	0	0	0
ENSG00000266924	RP11-154H12.2	-	18:79787121-79791432	0	0	0	0	0	0	0	0	0	0	0	0	0	0	0	0	0	0
ENSG00000254698	RP11-659G9.3	-	11:82963681-83039115	0	0	0	0	0	0	0	0	0	0	0	0	0	0	0	0	0	0
ENSG00000254699	RP11-12D16.2	-	11:86192787-86193482	0	0.235487	1.03273	0.495879	0.936448	0.272089	1.9441	0.84026	0.56043	0	1	4	2	4	1	7	3	2
ENSG00000266921	RP11-15A1.7	-	19:43996896-44002836	0.10131	0.0354775	0.0486282	0.102741	0.123451	0.0922419	0.0523018	0.11603	0.0422161	10	4	5	11	14	9	5	11	4
ENSG00000266920	ACTBP9	actin, beta pseudogene 9 [Source:HGNC Symbol;Acc:HGNC:142]	18:62442028-62443126	0	0	0	0	0.0379087	0	0	0	0.0453852	0	0	0	0	1	0	0	0	1
ENSG00000257343	RP11-641A6.8	-	12:52746596-52748308	0	0	0	0	0	0	0	0	0	0	0	0	0	0	0	0	0	0
ENSG00000257342	RP11-571M6.7	-	12:57694132-57721510	0	0	0	0	0	0	0	0	0	0	0	0	0	0	0	0	0	0
ENSG00000257341	AL928654.7	Cysteine-rich protein 1 [Source:UniProtKB/Swiss-Prot;Acc:P50238]	14:105487199-105492267	0.222105	0.0216065	0.142145	0.204787	0.0644465	0.499373	0.229315	0.128493	0.257131	9	1	6	9	3	20	9	5	10
ENSG00000215867	KRT18P57	keratin 18 pseudogene 57 [Source:HGNC Symbol;Acc:HGNC:48884]	1:111648291-111649544	0	0	0	0	0	0	0	0	0	0	0	0	0	0	0	0	0	0
ENSG00000257346	RP11-386G11.8	-	12:49090208-49093312	0.0965401	0	0	0	0.0419976	0	0	0.0502575	0	2	0	0	0	1	0	0	1	0
ENSG00000257345	RP11-511B23.1	-	12:92999218-93019820	0.206763	0	0.0850592	0	0.0257012	0	0	0	0	7	0	3	0	1	0	0	0	0
ENSG00000234337	RP11-297L17.6	-	16:52655307-52656045	4.92381	3.85741	2.30117	3.76314	2.98886	3.08077	2.8094	4.78949	4.25248	76	68	37	63	53	47	42	71	63
ENSG00000215861	WI2-1896O14.1	-	1:149197992-149321732	105.352	105.768	105.172	83.4106	90.1837	89.9228	76.1356	79.2377	76.4006	2053	2354	2135	1763	2019	1732	1437	1483	1429
ENSG00000119509	INVS	inversin [Source:HGNC Symbol;Acc:HGNC:17870]	9:100099256-100301000	2.43866	2.57452	2.8592	2.71678	2.90214	2.58938	2.51785	2.63835	2.86497	384	463	469	464	525	403	384	399	433
ENSG00000228949	UGT1A12P	UDP glucuronosyltransferase 1 family, polypeptide A12 pseudogene [Source:HGNC Symbol;Acc:HGNC:12533]	2:233585439-233586291	0.16838	0	0	0.103478	0	0.0567782	0.0579551	0.116894	0.116948	3	0	0	2	0	1	1	2	2
ENSG00000256699	RP11-669N7.3	-	12:129208601-129212662	0	0	0	0	0	0	0	0	0	0	0	0	0	0	0	0	0	0
ENSG00000256694	RP11-598F7.5	-	12:164664-166321	0	0	0	0	0	0.0439889	0	0	0	0	0	0	0	0	1	0	0	0
ENSG00000256695	RP1-166H1.2	-	12:120389546-120395994	0	0	0	0	0	0	0	0	0	0	0	0	0	0	0	0	0	0
ENSG00000228943	RP5-1053E7.2	-	1:28109739-28110298	0	0	0	0	0	0	0	0	0	0	0	0	0	0	0	0	0	0
ENSG00000228941	UBE3AP2	ubiquitin protein ligase E3A pseudogene 2 [Source:HGNC Symbol;Acc:HGNC:12498]	21:31060600-31063168	0	0	0	0	0	0	0	0	0	0	0	0	0	0	0	0	0	0
ENSG00000228940	RP11-348A7.1	-	1:40938104-40939763	0	0	0	0	0	0	0	0	0	0	0	0	0	0	0	0	0	0
ENSG00000165309	ARMC3	armadillo repeat containing 3 [Source:HGNC Symbol;Acc:HGNC:30964]	10:22928024-23038523	0.107311	0.0845661	0.133922	0.108832	0.149455	0.0868605	0.11634	0.128497	0.0838535	20	18	26	22	32	16	21	23	15
ENSG00000165304	MELK	maternal embryonic leucine zipper kinase [Source:HGNC Symbol;Acc:HGNC:16870]	9:36572862-36677683	12.2368	12.7643	12.5634	12.2759	11.7217	12.7469	13.0777	12.7587	13.1703	1453	1731	1554	1581	1599	1496	1504	1455	1501
ENSG00000165300	SLITRK5	SLIT and NTRK like family member 5 [Source:HGNC Symbol;Acc:HGNC:20295]	13:87672615-87696272	0.0726008	0.0973381	0.11543	0.0732108	0.082942	0.0849297	0.11478	0.0826797	0.0590939	32	49	53	35	42	37	49	35	25
ENSG00000101608	MYL12A	myosin light chain 12A [Source:HGNC Symbol;Acc:HGNC:16701]	18:3247481-3256236	41.5284	37.0212	35.7615	34.4013	35.3362	33.8257	32.4928	33.2727	34.8018	5566	5667	4993	5001	5441	4481	4218	4283	4477
ENSG00000101605	MYOM1	myomesin 1 [Source:HGNC Symbol;Acc:HGNC:7613]	18:3066807-3220108	0.573564	0.562812	0.783177	0.588073	0.443304	0.54528	0.423723	0.489085	0.489398	116	130	165	129	103	109	83	95	95
ENSG00000170100	ZNF778	zinc finger protein 778 [Source:HGNC Symbol;Acc:HGNC:26479]	16:89217703-89237071	1.23287	1.44395	1.80961	1.39334	1.0916	1.33587	1.71363	1.44655	1.49719	465	622	711	570	473	498	626	524	542
ENSG00000237026	RP11-328P23.2	-	7:65235790-65236723	0	0	0	0	0	0	0	0	0	0	0	0	0	0	0	0	0	0
ENSG00000187900	OR5H7P	olfactory receptor family 5 subfamily H member 7 pseudogene [Source:HGNC Symbol;Acc:HGNC:14771]	3:98238352-98239281	0	0	0	0	0	0	0	0	0	0	0	0	0	0	0	0	0	0
ENSG00000198791	CNOT7	CCR4-NOT transcription complex subunit 7 [Source:HGNC Symbol;Acc:HGNC:14101]	8:17224964-17246878	7.99563	7.17202	7.30687	6.88006	6.86688	7.65788	7.02928	8.65828	7.29696	2249	2304	2141	2099	2219	2129	1915	2339	1970
ENSG00000198792	TMEM184B	transmembrane protein 184B [Source:HGNC Symbol;Acc:HGNC:1310]	22:38219291-38273034	2.75625	2.88103	2.85734	3.14791	2.79701	2.9669	2.80311	2.78096	1.92782	1001	1195	1081	1240	1167	1065	986	970	672
ENSG00000198793	MTOR	mechanistic target of rapamycin (serine/threonine kinase) [Source:HGNC Symbol;Acc:HGNC:3942]	1:11106535-11262507	15.7593	18.8734	19.2392	19.137	19.7218	18.8728	18.1434	18.9977	17.4364	4519	6181	5747	5952	6497	5349	5039	5232	4799
ENSG00000198794	SCAMP5	secretory carrier membrane protein 5 [Source:HGNC Symbol;Acc:HGNC:30386]	15:74957219-75021496	0.0128464	0.0168752	0.0215824	0.0207283	0.00279496	0.0064983	0.0165825	0.0133786	0.0267729	4	6	7	7	1	2	5	4	8
ENSG00000198795	ZNF521	zinc finger protein 521 [Source:HGNC Symbol;Acc:HGNC:24605]	18:25061926-25352190	0.587144	0.655771	0.572512	0.545591	0.571438	0.66888	0.620533	0.553575	0.558742	127	162	129	128	142	143	130	115	116
ENSG00000198796	ALPK2	alpha kinase 2 [Source:HGNC Symbol;Acc:HGNC:20565]	18:58481247-58628957	0	0	0.00321857	0	0	0	0	0	0	0	0	1	0	0	0	0	0	0
ENSG00000198797	BRINP2	bone morphogenetic protein/retinoic acid inducible neural-specific 2 [Source:HGNC Symbol;Acc:HGNC:13746]	1:177171497-177282422	0	0	0	0	0	0	0	0	0	0	0	0	0	0	0	0	0	0
ENSG00000231426	RP5-899B16.1	-	6:139854850-139860151	0	0.0260676	0	0	0	0	0	0.124019	0	0	1	0	0	0	0	0	4	0
ENSG00000197776	KLHDC1	kelch domain containing 1 [Source:HGNC Symbol;Acc:HGNC:19836]	14:49693105-49753152	0.0455165	0.149463	0.109244	0.0524625	0.108971	0.18423	0.105746	0.059253	0.189708	4	15	10	5	11	16	9	5	16
ENSG00000231424	RP1-45C12.1	-	1:171247580-171251794	0	0	0	0	0	0	0.237671	0	0.1199	0	0	0	0	0	0	2	0	1
ENSG00000175550	DRAP1	DR1-associated protein 1 (negative cofactor 2 alpha) [Source:HGNC Symbol;Acc:HGNC:3019]	11:65919257-65921561	20.5269	17.3677	16.24	17.6709	19.9111	17.7265	16.4246	20.1848	18.6201	1871	1808	1542	1747	2085	1597	1450	1767	1629
ENSG00000231422	LINC01516	long intergenic non-protein coding RNA 1516 [Source:HGNC Symbol;Acc:HGNC:51211]	10:25113058-25161236	0	0	0	0	0	0	0	0	0	0	0	0	0	0	0	0	0	0
ENSG00000175556	LONRF3	LON peptidase N-terminal domain and ring finger 3 [Source:HGNC Symbol;Acc:HGNC:21152]	X:118974614-119018355	2.37332	2.75962	3.09239	2.75413	2.73241	2.69573	3.14957	2.76766	2.95403	375	498	509	472	496	421	482	420	448
ENSG00000197771	MCMBP	minichromosome maintenance complex binding protein [Source:HGNC Symbol;Acc:HGNC:25782]	10:119829404-119892556	9.38121	9.12904	9.14049	8.83513	9.34144	9.67067	8.76459	9.57055	8.44318	1535	1706	1558	1568	1756	1564	1389	1504	1326
ENSG00000231421	AC006050.2	-	17:30573471-30577000	0	0	0	0.0177527	0	0	0	0	0	0	0	0	1	0	0	0	0	0
ENSG00000279848	CTA-992D9.9	-	22:27044001-27045315	0	0	0	0	0	0	0	0	0	0	0	0	0	0	0	0	0	0
ENSG00000279849	AL023875.1	-	X:42285229-42285603	0	0	0	0	0	0	0	0	0	0	0	0	0	0	0	0	0	0
ENSG00000161682	FAM171A2	family with sequence similarity 171 member A2 [Source:HGNC Symbol;Acc:HGNC:30480]	17:44353215-44363875	3.89922	3.09371	2.80982	3.30582	3.61242	3.3633	3.51856	3.62453	3.80108	373	338	280	343	397	318	326	333	349
ENSG00000240173	RN7SL771P	RNA, 7SL, cytoplasmic 771, pseudogene [Source:HGNC Symbol;Acc:HGNC:46787]	7:140645829-140646126	0	0	0	0	0	0	0	0	0	0	0	0	0	0	0	0	0	0
ENSG00000179420	OR6W1P	olfactory receptor family 6 subfamily W member 1 pseudogene [Source:HGNC Symbol;Acc:HGNC:15091]	7:143062330-143063585	0	0	0	0	0	0	0	0	0	0	0	0	0	0	0	0	0	0
ENSG00000279840	RP1-228P16.9	-	12:47960497-47963469	0	0	0	0	0	0	0	0	0	0	0	0	0	0	0	0	0	0
ENSG00000279841	RP11-274A11.4	-	16:81630193-81632038	0.0518786	0	0.0746918	0.071746	0.0451595	0.0787082	0.0535598	0.0810218	0.0270197	2	0	3	3	2	3	2	3	1
ENSG00000279842	RP11-305A4.2	-	16:49900019-49900524	0	0	0	0	0	0	0	0	0	0	0	0	0	0	0	0	0	0
ENSG00000279844	RP11-20F18.1	-	2:160849313-160850676	0	0	0	0	0	0	0	0	0	0	0	0	0	0	0	0	0	0
ENSG00000279845	RP11-6L6.4	-	4:146180851-146181316	0.102704	0.08995	0.197287	0.189413	0.268296	0.311793	0.636511	0.641807	0.21407	1	1	2	2	3	3	6	6	2
ENSG00000279846	RP11-20G13.4	-	15:99497812-99498375	0	0	0	0	0	0	0	0	0	0	0	0	0	0	0	0	0	0
ENSG00000279847	C8orf87	chromosome 8 open reading frame 87 [Source:HGNC Symbol;Acc:HGNC:42974]	8:93134095-93166850	0	0	0	0	0	0	0	0	0	0	0	0	0	0	0	0	0	0
ENSG00000076321	KLHL20	kelch like family member 20 [Source:HGNC Symbol;Acc:HGNC:25056]	1:173714941-173786702	4.67082	4.90491	5.05995	4.90228	4.87612	4.92029	5.02111	5.1277	5.12291	607	728	685	691	728	632	632	640	639
ENSG00000183864	TOB2	transducer of ERBB2, 2 [Source:HGNC Symbol;Acc:HGNC:11980]	22:41433492-41447023	10.216	10.9239	10.3924	10.9156	10.4538	11.4793	11.5386	10.3568	10.5128	1139	1391	1207	1320	1339	1265	1246	1109	1125
ENSG00000183862	CNGA2	cyclic nucleotide gated channel alpha 2 [Source:HGNC Symbol;Acc:HGNC:2149]	X:151738451-151745304	0	0	0	0	0	0	0	0	0	0	0	0	0	0	0	0	0	0
ENSG00000167680	SEMA6B	sema domain, transmembrane domain (TM), and cytoplasmic domain, (semaphorin) 6B [Source:HGNC Symbol;Acc:HGNC:10739]	19:4542593-4559808	5.4362	4.21095	5.41598	4.28053	4.06687	3.97389	4.5003	4.12024	4.2453	555	491	576	474	477	401	445	404	416
ENSG00000124217	MOCS3	molybdenum cofactor synthesis 3 [Source:HGNC Symbol;Acc:HGNC:15765]	20:50958826-50963931	2.25042	1.95401	2.24132	2.32553	1.90173	2.35274	2.64299	1.93311	2.83311	240	238	249	269	233	248	273	198	290
ENSG00000124214	STAU1	staufen double-stranded RNA binding protein 1 [Source:HGNC Symbol;Acc:HGNC:11370]	20:49113339-49188367	31.4206	31.3975	33.0836	30.2611	31.0474	31.2235	31.5713	30.2126	30.2317	5111	5833	5606	5339	5802	5020	4974	4720	4720
ENSG00000124215	CDH26	cadherin 26 [Source:HGNC Symbol;Acc:HGNC:15902]	20:59958427-60034011	0.00540059	0.00945987	0.0259329	0.0149451	0.00470116	0.0163953	0.0334703	0.0168773	0	1	2	5	3	1	3	6	3	0
ENSG00000124212	PTGIS	prostaglandin I2 (prostacyclin) synthase [Source:HGNC Symbol;Acc:HGNC:9603]	20:49503874-49568146	0	0	0	0	0	0	0	0	0	0	0	0	0	0	0	0	0	0
ENSG00000167685	ZNF444	zinc finger protein 444 [Source:HGNC Symbol;Acc:HGNC:16052]	19:56132599-56160893	1.92232	2.53458	2.6635	2.55117	1.71902	1.62961	1.63199	2.21655	1.53731	512	771	739	737	526	429	421	567	393
ENSG00000247595	SPTY2D1-AS1	SPTY2D1 antisense RNA 1 [Source:HGNC Symbol;Acc:HGNC:44122]	11:18599787-18610255	0.0881752	0.0771946	0.152355	0.097548	0.107445	0.10705	0.10925	0.0918148	0.110228	5	5	9	6	7	6	6	5	6
ENSG00000161970	RPL26	ribosomal protein L26 [Source:HGNC Symbol;Acc:HGNC:10327]	17:8377520-8383213	88.9059	73.0248	74.5266	85.6094	76.3606	84.3014	72.8769	83.9459	88.7595	10176	9546	8886	10628	10041	9537	8079	9228	9751
ENSG00000175073	VCPIP1	valosin containing protein (p97)/p47 complex interacting protein 1 [Source:HGNC Symbol;Acc:HGNC:30897]	8:66628487-66667217	5.62957	6.66634	7.02677	5.36788	5.57089	5.94415	5.86209	5.17963	5.69969	1169	1581	1520	1209	1329	1220	1179	1033	1136
ENSG00000161973	CCDC42	coiled-coil domain containing 42 [Source:HGNC Symbol;Acc:HGNC:26528]	17:8729934-8745219	0	0.0344851	0	0	0	0	0	0	0	0	2	0	0	0	0	0	0	0
ENSG00000255279	RP11-375D13.4	-	11:41855920-41875997	0	0	0	0	0	0	0	0	0	0	0	0	0	0	0	0	0	0
ENSG00000255275	RP13-279N23.2	-	1:18849273-18921121	0	0.00959412	0.0105162	0.0101014	0.0572333	0.0886939	0.0113151	0.205378	0	0	1	1	1	6	8	1	18	0
ENSG00000255274	TMPRSS4-AS1	TMPRSS4 antisense RNA 1 [Source:HGNC Symbol;Acc:HGNC:44179]	11:118015772-118086793	0	0	0	0	0	0	0	0	0	0	0	0	0	0	0	0	0	0
ENSG00000255277	ABCC6P2	ATP binding cassette subfamily C member 6 pseudogene 2 [Source:HGNC Symbol;Acc:HGNC:33353]	16:14820792-14824702	0	0.0323431	0	0	0.0964708	0	0.114434	0.0769374	0.30793	0	1	0	0	3	0	3	2	8
ENSG00000255276	RRM1-AS1	RRM1 antisense RNA 1 [Source:HGNC Symbol;Acc:HGNC:40512]	11:4137116-4138257	0	0	0	0	0	0	0	0	0	0	0	0	0	0	0	0	0	0
ENSG00000255271	RP4-594L9.2	-	11:34533014-34557924	0	0	0	0	0	0	0	0	0	0	0	0	0	0	0	0	0	0
ENSG00000255270	NAV2-IT1	NAV2 intronic transcript 1 [Source:HGNC Symbol;Acc:HGNC:41416]	11:19380484-19385014	0	0	0	0	0	0	0	0	0	0	0	0	0	0	0	0	0	0
ENSG00000255273	AF238378.7	-	8:7082971-7083328	0	0	0	0	0	0	0	0	0	0	0	0	0	0	0	0	0	0
ENSG00000255272	RP11-646J21.6	-	11:33776188-33779495	0	0	0	0	0	0	0	0	0	0	0	0	0	0	0	0	0	0
ENSG00000239670	RP4-803A2.2	-	1:32986952-32988233	0	0	0	0	0	0	0	0	0	0	0	0	0	0	0	0	0	0
ENSG00000160087	UBE2J2	ubiquitin conjugating enzyme E2, J2 [Source:HGNC Symbol;Acc:HGNC:19268]	1:1253909-1273885	4.08565	3.05616	3.72101	3.15372	3.52753	3.15598	3.23202	4.08952	3.82797	1112	950	1055	931	1103	849	852	1069	1000
ENSG00000036054	TBC1D23	TBC1 domain family member 23 [Source:HGNC Symbol;Acc:HGNC:25622]	3:100261000-100325251	12.2887	12.9957	13.5022	10.2164	6.21632	7.14531	11.3336	10.1052	11.6017	2483	2999	2842	2239	1443	1427	2218	1961	2250
ENSG00000104903	LYL1	lymphoblastic leukemia associated hematopoiesis regulator 1 [Source:HGNC Symbol;Acc:HGNC:6734]	19:13099033-13103161	39.0899	33.2685	32.7757	38.7404	35.9827	34.7159	32.8295	33.7401	32.647	3216	3126	2809	3457	3401	2823	2616	2666	2578
ENSG00000228349	RPS26P4	ribosomal protein S26 pseudogene 4 [Source:HGNC Symbol;Acc:HGNC:23775]	21:39491544-39491898	0	0	0	0	0	0	0	0	0	0	0	0	0	0	0	0	0	0
ENSG00000002587	HS3ST1	heparan sulfate-glucosamine 3-sulfotransferase 1 [Source:HGNC Symbol;Acc:HGNC:5194]	4:11393150-11429765	0	0	0	0	0	0	0	0	0	0	0	0	0	0	0	0	0	0
ENSG00000002586	CD99	CD99 molecule [Source:HGNC Symbol;Acc:HGNC:7082]	X:2691179-2741309	11.3688	10.0579	9.95565	8.98921	9.58706	9.0493	8.95235	9.81316	10.0966	1538	1554	1403	1319	1490	1210	1173	1275	1311
ENSG00000237868	AC097533.1	-	4:122077840-122078318	0.0999165	0.175018	0.287852	0.184272	0	0.20222	0.206412	0.416329	0.41652	1	2	3	2	0	2	2	4	4
ENSG00000177954	RPS27	ribosomal protein S27 [Source:HGNC Symbol;Acc:HGNC:10416]	1:153990759-153992150	14.4373	12.0216	10.2169	9.93119	10.2718	13.761	10.8559	10.2447	13.4002	449	427	331	335	367	423	327	306	400
ENSG00000177951	BET1L	Bet1 golgi vesicular membrane trafficking protein like [Source:HGNC Symbol;Acc:HGNC:19348]	11:167784-207428	21.1685	20.671	20.978	20.8383	20.8552	18.9071	19.1738	19.9513	19.2324	3618	4035	3735	3863	4095	3194	3174	3275	3155
ENSG00000280059	RP11-401I19.2	-	4:130808507-130811933	0	0	0	0	0	0	0	0	0	0	0	0	0	0	0	0	0	0
ENSG00000280058	RP1-131F15.3	-	6:131910191-131911527	0	0	0	0	0	0	0	0	0	0	0	0	0	0	0	0	0	0
ENSG00000198242	RPL23A	ribosomal protein L23a [Source:HGNC Symbol;Acc:HGNC:10317]	17:28719393-28724359	29.535	25.0122	23.0147	27.5501	25.1672	27.2081	26.0002	25.1122	28.6412	2470	2389	2005	2499	2418	2249	2106	2017	2299
ENSG00000280056	RP11-562F9.3	-	4:92260367-92260751	0	0	0	0	0	0	0	0	0	0	0	0	0	0	0	0	0	0
ENSG00000237862	RP1-63G5.7	-	22:37352190-37354839	0	0	0	0	0	0	0	0	0	0	0	0	0	0	0	0	0	0
ENSG00000237863	RP6-24A23.3	-	X:108736011-108738903	0	0	0	0	0	0	0	0	0	0	0	0	0	0	0	0	0	0
ENSG00000198246	SLC29A3	solute carrier family 29 (equilibrative nucleoside transporter), member 3 [Source:HGNC Symbol;Acc:HGNC:23096]	10:71319258-71363385	2.67565	2.94617	2.14042	2.9403	3.0465	2.36526	2.33001	2.37788	2.21041	198	249	165	236	259	173	167	169	157
ENSG00000223012	RN7SKP264	RNA, 7SK small nuclear pseudogene 264 [Source:HGNC Symbol;Acc:HGNC:45988]	9:86258358-86258646	0	0	0	0	0	0	0	0	0	0	0	0	0	0	0	0	0	0
ENSG00000280051	RP11-206B11.1	-	12:129262345-129262824	0	0	0	0	0	0	0	0	0	0	0	0	0	0	0	0	0	0
ENSG00000280050	AC008622.1	-	19:46792971-46793189	0	0	0	0	0	0	0	0	0	0	0	0	0	0	0	0	0	0
ENSG00000135917	SLC19A3	solute carrier family 19 (thiamine transporter), member 3 [Source:HGNC Symbol;Acc:HGNC:16266]	2:227685210-227718012	0	0	0	0	0	0	0	0	0	0	0	0	0	0	0	0	0	0
ENSG00000135916	ITM2C	integral membrane protein 2C [Source:HGNC Symbol;Acc:HGNC:6175]	2:230864639-230879248	7.93928	9.00548	7.83775	9.2748	8.9817	6.301	7.57649	9.10962	6.16679	951	1232	978	1205	1236	746	879	1048	709
ENSG00000135914	HTR2B	5-hydroxytryptamine (serotonin) receptor 2B, G protein-coupled [Source:HGNC Symbol;Acc:HGNC:5294]	2:231108230-231125118	0	0	0	0	0	0	0	0	0	0	0	0	0	0	0	0	0	0
ENSG00000135913	USP37	ubiquitin specific peptidase 37 [Source:HGNC Symbol;Acc:HGNC:20063]	2:218450251-218568361	2.15657	1.93786	2.1438	2.0436	2.13248	2.27294	2.3849	1.99556	2.29547	647	664	670	665	735	674	693	575	661
ENSG00000135912	TTLL4	tubulin tyrosine ligase like 4 [Source:HGNC Symbol;Acc:HGNC:28976]	2:218710845-218755416	2.09296	2.7212	2.43824	2.44115	2.45119	2.75067	1.9899	2.16279	1.94226	796	1182	966	1007	1071	1034	733	790	709
ENSG00000092148	HECTD1	HECT domain containing E3 ubiquitin protein ligase 1 [Source:HGNC Symbol;Acc:HGNC:20157]	14:31100112-31207804	5.80015	6.72934	7.41175	6.71122	6.82606	7.13741	7.41136	6.84073	6.98441	2298	3045	3059	2884	3107	2795	2844	2603	2656
ENSG00000034693	PEX3	peroxisomal biogenesis factor 3 [Source:HGNC Symbol;Acc:HGNC:8858]	6:143450807-143490010	6.71456	6.64599	7.53372	6.57062	7.33942	7.36676	7.42905	7.74225	8.21232	391	442	457	415	491	424	419	433	459
ENSG00000135919	SERPINE2	serpin peptidase inhibitor, clade E (nexin, plasminogen activator inhibitor type 1), member 2 [Source:HGNC Symbol;Acc:HGNC:8951]	2:223975112-224039319	0.0199946	0.00700187	0.011516	0.02212	0.0104423	0.0242746	0	0.00416399	0.0249954	5	2	3	6	3	6	0	1	6
ENSG00000230487	PSMG3-AS1	PSMG3 antisense RNA 1 (head to head) [Source:HGNC Symbol;Acc:HGNC:22230]	7:1570073-1589626	0.183669	0.170663	0.251879	0.27647	0.283858	0.273051	0.278644	0.206849	0.156211	49	52	70	80	87	72	72	53	40
ENSG00000176396	EID2	EP300 interacting inhibitor of differentiation 2 [Source:HGNC Symbol;Acc:HGNC:28292]	19:39538250-39540230	7.63723	5.56546	5.86978	6.5288	5.44863	5.74628	5.53964	6.36662	5.89219	316	263	253	293	259	235	222	253	234
ENSG00000230484	OR51A10P	olfactory receptor family 51 subfamily A member 10 pseudogene [Source:HGNC Symbol;Acc:HGNC:15185]	11:5468486-5469422	0.30657	0.357924	0.343337	0.235549	0.177895	0.827168	0.685821	0.21283	0.638837	6	8	7	5	4	16	13	4	12
ENSG00000176390	CRLF3	cytokine receptor-like factor 3 [Source:HGNC Symbol;Acc:HGNC:17177]	17:30769388-30824776	17.2207	16.3513	15.8454	15.728	15.9297	15.2289	15.4005	15.5751	16.8873	2025	2196	1941	2006	2152	1770	1754	1759	1906
ENSG00000230482	ATP5G2P3	ATP synthase, H+ transporting, mitochondrial Fo complex subunit C2 (subunit 9) pseudogene 3 [Source:HGNC Symbol;Acc:HGNC:42187]	2:197263111-197263535	0	0	0	0	0	0	0	0	0	0	0	0	0	0	0	0	0	0
ENSG00000230481	IGKV1OR22-5	immunoglobulin kappa variable 1/OR22-5 (pseudogene) [Source:HGNC Symbol;Acc:HGNC:5773]	22:16904219-16904696	0	0	0	0	0	0	0	0	0	0	0	0	0	0	0	0	0	0
ENSG00000176393	RNPEP	arginyl aminopeptidase (aminopeptidase B) [Source:HGNC Symbol;Acc:HGNC:10078]	1:201982372-202006147	18.7612	17.6345	16.1609	17.3541	18.148	17.0093	16.5942	17.24	18.7199	2435	2614	2185	2443	2706	2182	2086	2149	2332
ENSG00000176399	DMRTA1	DMRT-like family A1 [Source:HGNC Symbol;Acc:HGNC:13826]	9:22446841-22455740	0	0	0	0	0	0	0	0	0	0	0	0	0	0	0	0	0	0
ENSG00000230489	VAV3-AS1	VAV3 antisense RNA 1 [Source:HGNC Symbol;Acc:HGNC:40608]	1:107964443-107994607	0	0	0	0	0	0	0	0	0	0	0	0	0	0	0	0	0	0
ENSG00000243900	RN7SL320P	RNA, 7SL, cytoplasmic 320, pseudogene [Source:HGNC Symbol;Acc:HGNC:46336]	13:51469753-51470047	0	0	0.155746	0	0	0	0	0	0	0	0	1	0	0	0	0	0	0
ENSG00000243902	ELFN2	extracellular leucine-rich repeat and fibronectin type III domain containing 2 [Source:EntrezGene;Acc:114794]	22:37339583-37427445	0	0	0	0	0	0	0	0	0	0	0	0	0	0	0	0	0	0
ENSG00000243903	RP11-285B24.1	-	3:59380024-59388704	0	0	0	0	0	0	0	0	0	0	0	0	0	0	0	0	0	0
ENSG00000243904	RPSAP5	ribosomal protein SA pseudogene 5 [Source:HGNC Symbol;Acc:HGNC:20139]	14:103374033-103374916	0.0541403	0.0948341	0.104	0.0499244	0.0943037	0.0547871	0.0559227	0.0563976	0.112847	1	2	2	1	2	1	1	1	2
ENSG00000083635	NUFIP1	nuclear fragile X mental retardation protein interacting protein 1 [Source:HGNC Symbol;Acc:HGNC:8057]	13:44939249-44989483	6.07385	5.59424	5.60687	5.72631	5.70462	6.14515	5.71899	5.65319	5.5139	443	466	426	453	478	443	404	396	386
ENSG00000248029	CTD-2313F11.3	-	5:55063179-55066230	0	0	0	0	0	0	0	0	0	0	0	0	0	0	0	0	0	0
ENSG00000248027	CTD-2383M3.1	-	11:100684162-100687955	0.179712	0.112377	0.147862	0.165671	0.156415	0.12987	0.238537	0.106929	0.106978	7	5	6	7	7	5	9	4	4
ENSG00000147873	IFNA5	interferon, alpha 5 [Source:HGNC Symbol;Acc:HGNC:5426]	9:21304326-21305312	0	0	0	0	0	0	0	0	0	0	0	0	0	0	0	0	0	0
ENSG00000279713	CTD-3035K23.3	-	17:62679403-62681354	0	0	0	0	0	0.0248114	0	0.0255407	0	0	0	0	0	0	1	0	1	0
ENSG00000247624	CPEB2-AS1	CPEB2 antisense RNA 1 (head to head) [Source:HGNC Symbol;Acc:HGNC:49082]	4:14909961-15002045	0	0	0.0595099	0	0.0134871	0.0313576	0	0.0161397	0.0161471	0	0	4	0	1	2	0	1	1
ENSG00000247627	MTND4P12	mitochondrially encoded NADH:ubiquinone oxidoreductase core subunit 4 pseudogene 12 [Source:HGNC Symbol;Acc:HGNC:42199]	5:134926660-134928036	25.0341	17.018	13.9851	21.8305	20.4893	14.3878	14.3236	14.8068	15.3233	720	559	419	681	677	409	399	409	423
ENSG00000167531	LALBA	lactalbumin, alpha- [Source:HGNC Symbol;Acc:HGNC:6480]	12:48567684-48570066	0	0	0	0	0	0	0	0	0	0	0	0	0	0	0	0	0	0
ENSG00000167536	DHRS13	dehydrogenase/reductase (SDR family) member 13 [Source:HGNC Symbol;Acc:HGNC:28326]	17:28897781-28903071	6.39272	4.76027	4.54229	6.09866	5.70737	5.79364	5.15462	6.12326	5.80518	662	563	490	685	679	593	517	609	577
ENSG00000167535	CACNB3	calcium channel, voltage-dependent, beta 3 subunit [Source:HGNC Symbol;Acc:HGNC:1403]	12:48813794-48828941	0.266971	0.224989	0.26589	0.184604	0.183	0.286986	0.161938	0.295345	0.25381	80	77	83	60	63	85	47	85	73
ENSG00000236472	AC002401.1	-	17:50135586-50146176	0	0	0	0	0	0	0	0	0	0	0	0	0	0	0	0	0	0
ENSG00000188886	ASTL	astacin-like metallo-endopeptidase (M12 family) [Source:HGNC Symbol;Acc:HGNC:31704]	2:96123850-96138436	0	0	0	0	0	0	0	0	0.0532319	0	0	0	0	0	0	0	0	2
ENSG00000279716	AC006128.2	-	19:15398696-15400356	0	0	0	0	0	0	0	0	0	0	0	0	0	0	0	0	0	0
ENSG00000188883	KLRG2	killer cell lectin-like receptor subfamily G, member 2 [Source:HGNC Symbol;Acc:HGNC:24778]	7:139452690-139483712	0	0	0	0	0	0	0	0	0	0	0	0	0	0	0	0	0	0
ENSG00000279717	LLNLF-158E9.1	-	19:15904556-15907234	0	0.0625856	0	0.0164738	0.0622201	0.0180783	0.018453	0	0.0186182	0	4	0	1	4	1	1	0	1
ENSG00000241506	PSMC1P1	proteasome (prosome, macropain) 26S subunit, ATPase, 1 pseudogene 1 [Source:HGNC Symbol;Acc:HGNC:30147]	3:68635705-68637024	69.9306	65.4536	63.0914	63.4372	67.0269	66.6783	68.5689	68.4316	67.4544	1928	2061	1812	1897	2123	1817	1831	1812	1785
ENSG00000241505	RP11-161I10.1	-	1:190480379-190494297	0	0	0	0	0	0	0	0	0	0	0	0	0	0	0	0	0	0
ENSG00000094796	KRT31	keratin 31, type I [Source:HGNC Symbol;Acc:HGNC:6448]	17:41393724-41397592	0	0	0	0	0	0	0	0	0	0	0	0	0	0	0	0	0	0
ENSG00000279719	RP11-81A1.7	-	15:79989905-79990606	0	0	0	0	0	0	0	0	0	0	0	0	0	0	0	0	0	0
ENSG00000226453	RP11-379B8.1	-	6:81845185-81933480	1.22317	2.03994	1.95697	2.04064	1.0647	1.88572	1.62368	2.00131	1.57778	21	40	35	38	21	32	27	33	26
ENSG00000239249	RN7SL757P	RNA, 7SL, cytoplasmic 757, pseudogene [Source:HGNC Symbol;Acc:HGNC:46773]	22:28056153-28056453	0	0	0	0	0	0	0	0	0	0	0	0	0	0	0	0	0	0
ENSG00000237289	CKMT1B	creatine kinase, mitochondrial 1B [Source:HGNC Symbol;Acc:HGNC:1995]	15:43593054-43604901	0.100189	0.0548272	0.0721324	0.0750539	0.0436067	0.0696898	0.0840458	0.117355	0.0195703	16	10	12	13	8	11	13	18	3
ENSG00000239739	RP11-373E16.4	-	3:170740351-170741365	0	0	0	0	0	0	0	0	0	0	0	0	0	0	0	0	0	0
ENSG00000237285	HNRNPA1P2	heterogeneous nuclear ribonucleoprotein A1 pseudogene 2 [Source:HGNC Symbol;Acc:HGNC:13958]	6:32325219-32326178	0	0	0.0478594	0	0	0	0	0	0.0519565	0	0	1	0	0	0	0	0	1
ENSG00000237286	AC004906.3	-	7:2944035-2947091	0	0	0	0	0	0	0	0	0	0	0	0	0	0	0	0	0	0
ENSG00000237280	RP11-96C23.9	-	10:87113954-87115523	0.069564	0.182776	0.0667806	0.0641471	0.181724	0.14079	0	0.0724643	0.217493	1	3	1	1	3	2	0	1	3
ENSG00000237281	CATIP-AS2	CATIP antisense RNA 2 [Source:HGNC Symbol;Acc:HGNC:41079]	2:218326889-218357966	0	0	0	0	0	0	0	0	0	0	0	0	0	0	0	0	0	0
ENSG00000237282	LINC00851	long intergenic non-protein coding RNA 851 [Source:HGNC Symbol;Acc:HGNC:43424]	20:18379049-18381484	0	0	0	0	0	0	0	0	0	0	0	0	0	0	0	0	0	0
ENSG00000237283	RP11-316I3.1	-	1:188705623-188710880	0	0	0	0	0	0	0	0	0	0	0	0	0	0	0	0	0	0
ENSG00000272254	RP11-531A24.7	-	8:73042910-73043346	0	0	0	0	0	0	0	0	0	0	0	0	0	0	0	0	0	0
ENSG00000272255	CTD-3224K15.3	-	5:139644460-139645002	0.08814	0	0	0.0812766	0	0.089193	0	0	0.0918569	1	0	0	1	0	1	0	0	1
ENSG00000272256	RP11-489E7.4	-	8:30082758-30083467	0.0674085	0.0590376	0.0647114	0.248699	0.117415	0	0	0.140438	0.0702511	1	1	1	4	2	0	0	2	1
ENSG00000272250	RP11-346C20.4	-	16:73060245-73060759	0	0	0	0	0	0	0	0	0	0	0	0	0	0	0	0	0	0
ENSG00000272259	RP11-305P22.9	-	20:63009383-63085071	0	0	0	0	0	0	0	0	0	0	0	0	0	0	0	0	0	0
ENSG00000101327	PDYN	prodynorphin [Source:HGNC Symbol;Acc:HGNC:8820]	20:1978757-1994285	0	0	0	0	0	0	0	0	0	0	0	0	0	0	0	0	0	0
ENSG00000271781	CTD-2589H19.6	-	5:675826-676616	0.363155	0.26496	0.174312	0.33482	0.895643	0.796096	0.374986	0.378106	0.126114	6	5	3	6	17	13	6	6	2
ENSG00000271780	RP11-1017G21.5	-	14:101948347-101949425	1.33116	1.98143	1.49085	1.9637	1.54495	2.42424	1.92414	2.35623	2.26528	30	51	35	48	40	54	42	51	49
ENSG00000271787	RP11-254F7.3	-	2:10054421-10054866	0	0	0.103016	0	0.0934118	0	0	0	0	0	0	1	0	1	0	0	0	0
ENSG00000271784	RP1-28H20.3	-	20:46689659-46690289	0	0	0.145699	0	0	0	0	0.237031	0	0	0	2	0	0	0	0	3	0
ENSG00000200475	RN7SKP162	RNA, 7SK small nuclear pseudogene 162 [Source:HGNC Symbol;Acc:HGNC:45886]	12:13683542-13683886	0	0	0	0	0	0	0	0	0	0	0	0	0	0	0	0	0	0
ENSG00000049192	ADAMTS6	ADAM metallopeptidase with thrombospondin type 1 motif 6 [Source:HGNC Symbol;Acc:HGNC:222]	5:65148736-65481920	0.471994	0.532657	0.580634	0.518975	0.426061	0.555358	0.624494	0.52785	0.611962	135	174	173	161	140	157	173	145	168
ENSG00000271789	RP5-1112D6.7	-	6:111297126-111298510	0.241995	0.302678	0.23228	0.223087	0.150463	0.139911	0.285513	0.251941	0.144053	7	10	7	7	5	4	8	7	4
ENSG00000271788	CTD-2201E18.5	-	5:43006733-43007543	0.826485	0.775329	0.793416	0.653126	0.513859	0.47781	1.15811	0.983522	0.984097	14	15	14	12	10	8	19	16	16
ENSG00000274363	RP11-104O19.4	-	17:4267691-4268430	0.517599	0.169933	0.186326	0.238617	0.168954	0.0654484	0.0668049	0.336861	0.202209	8	3	3	4	3	1	1	5	3
ENSG00000200472	RN7SKP44	RNA, 7SK small nuclear pseudogene 44 [Source:HGNC Symbol;Acc:HGNC:45768]	18:31718893-31719208	0	0	0	0	0	0	0	0	0	0	0	0	0	0	0	0	0	0
ENSG00000101323	HAO1	hydroxyacid oxidase (glycolate oxidase) 1 [Source:HGNC Symbol;Acc:HGNC:4809]	20:7882981-7940474	0	0.0707654	0	0	0	0	0	0	0	0	3	0	0	0	0	0	0	0
ENSG00000237136	C4orf51	chromosome 4 open reading frame 51 [Source:HGNC Symbol;Acc:HGNC:37264]	4:145680204-145771032	0	0	0	0	0	0	0	0	0	0	0	0	0	0	0	0	0	0
ENSG00000177042	TMEM80	transmembrane protein 80 [Source:HGNC Symbol;Acc:HGNC:27453]	11:695428-705028	2.03914	1.57754	1.87704	2.30496	1.96946	2.06308	1.89626	1.9632	1.87713	292	258	280	358	324	292	263	270	258
ENSG00000237135	DDX10P1	DEAD (Asp-Glu-Ala-Asp) box polypeptide 10 pseudogene 1 [Source:HGNC Symbol;Acc:HGNC:44960]	10:30919012-30921235	0	0.108424	0	0.0913483	0	0.0250553	0.102298	0	0	0	5	0	4	0	1	4	0	0
ENSG00000177047	IFNW1	interferon, omega 1 [Source:HGNC Symbol;Acc:HGNC:5448]	9:21140214-21142145	0	0	0	0	0	0	0	0	0	0	0	0	0	0	0	0	0	0
ENSG00000129566	TEP1	telomerase-associated protein 1 [Source:HGNC Symbol;Acc:HGNC:11726]	14:20365667-20413429	1.28352	1.73369	1.64193	1.47338	1.57194	1.59127	1.3716	1.52064	1.34018	457	705	609	569	643	560	473	520	458
ENSG00000177045	SIX5	SIX homeobox 5 [Source:HGNC Symbol;Acc:HGNC:10891]	19:45764785-45769226	2.35926	2.27772	2.4864	2.50222	2.57312	2.4895	1.95335	2.21025	2.23511	419	462	460	482	525	437	336	377	381
ENSG00000272789	RP11-286H15.1	-	2:127625997-127626848	0	0	0	0	0	0	0	0	0	0	0	0	0	0	0	0	0	0
ENSG00000272787	KB-226F1.2	-	22:23969211-23969873	0	0	0	0	0	0.0730495	0	0	0	0	0	0	0	0	1	0	0	0
ENSG00000272784	RP11-335L23.5	-	4:183094423-183095056	0	0	0	0.0696107	0.0657124	0	0	0.0786363	0	0	0	0	1	1	0	0	1	0
ENSG00000154252	GAL3ST2	galactose-3-O-sulfotransferase 2 [Source:HGNC Symbol;Acc:HGNC:24869]	2:241776825-241804208	0.209676	0.275395	0	0	0.18252	0.247498	0.108253	0.254699	0.182038	6	9	0	0	6	7	3	7	5
ENSG00000272783	RP13-1016M1.2	-	4:1550284-1550572	0	0	0	0	0	0	0	0	0	0	0	0	0	0	0	0	0	0
ENSG00000237138	HUNK-AS1	HUNK antisense RNA 1 [Source:HGNC Symbol;Acc:HGNC:40631]	21:32020966-32021782	0	0	0	0	0	0	0	0	0	0	0	0	0	0	0	0	0	0
ENSG00000237139	RP11-137L10.5	-	10:73537803-73538391	0	0	0	0	0	0	0	0	0	0	0	0	0	0	0	0	0	0
ENSG00000277550	RP5-1057B20.3	-	20:38103524-38104961	0	0	0	0	0	0	0	0	0	0	0	0	0	0	0	0	0	0
ENSG00000141232	TOB1	transducer of ERBB2, 1 [Source:HGNC Symbol;Acc:HGNC:11979]	17:50862223-50867978	7.957	6.9487	7.16724	6.74884	6.68069	6.97281	5.86506	6.61053	6.47327	762	760	715	701	735	660	544	608	595
ENSG00000277556	OR13C5	olfactory receptor family 13 subfamily C member 5 [Source:HGNC Symbol;Acc:HGNC:15100]	9:104598457-104599413	0	0	0	0	0	0	0	0	0	0	0	0	0	0	0	0	0	0
ENSG00000277558	RP3-468O1.6	-	20:34476205-34476787	0	0	0.157695	0.1514	0.0714608	0.166147	0.169591	0.171031	0.0855545	0	0	2	2	1	2	2	2	1
ENSG00000277559	RP11-434E6.4	-	16:54290965-54292422	0	0	0	0	0	0	0	0	0	0	0	0	0	0	0	0	0	0
ENSG00000172671	ZFAND4	zinc finger, AN1-type domain 4 [Source:HGNC Symbol;Acc:HGNC:23504]	10:45615501-45672780	0.237703	0.366304	0.342272	0.210389	0.306221	0.3415	0.235604	0.193045	0.30709	50	88	75	48	74	71	48	39	62
ENSG00000112337	SLC17A2	solute carrier family 17, member 2 [Source:HGNC Symbol;Acc:HGNC:10930]	6:25912754-25930726	0	0	0	0	0	0	0	0	0	0	0	0	0	0	0	0	0	0
ENSG00000274098	RN7SL787P	RNA, 7SL, cytoplasmic 787, pseudogene [Source:HGNC Symbol;Acc:HGNC:46803]	9:67791499-67791782	0	0	0	0	0	0	0	0	0	0	0	0	0	0	0	0	0	0
ENSG00000274099	ABCB10P1	ATP binding cassette subfamily B member 10 pseudogene 1 [Source:HGNC Symbol;Acc:HGNC:14114]	15:23179869-23182049	0.878091	0.788056	1.01151	0.748846	0.936304	1.15493	0.67995	0.6857	0.846239	40	41	48	37	49	52	30	30	37
ENSG00000279068	CH17-140K24.5	-	5:141182409-141188582	0	0	0	0	0	0	0	0	0	0	0	0	0	0	0	0	0	0
ENSG00000223761	RP11-57C13.4	-	10:87591607-87606024	0	0	0	0	0	0	0	0	0	0	0	0	0	0	0	0	0	0
ENSG00000223764	RP11-54O7.3	-	1:916865-921016	0.131892	0.135864	0.126615	0.128759	0.108053	0.259033	0.1522	0.226187	0.129331	17	20	17	18	16	33	19	28	16
ENSG00000223765	LINC01626	long intergenic non-protein coding RNA 1626 [Source:HGNC Symbol;Acc:HGNC:52257]	6:71450834-71458874	0	0	0	0	0	0	0	0	0	0	0	0	0	0	0	0	0	0
ENSG00000279062	CH507-216K13.1	-	21:10136419-10137004	0	0	0	0	0	0	0.253084	0	0	0	0	0	0	0	0	3	0	0
ENSG00000279063	CTD-2537I9.15	-	19:55467438-55467934	0	0	0	0	0	0	0	0	0	0	0	0	0	0	0	0	0	0
ENSG00000223768	LINC00205	long intergenic non-protein coding RNA 205 [Source:HGNC Symbol;Acc:HGNC:16420]	21:45293285-45297354	2.30612	1.8685	2.54419	2.4435	2.21707	2.36801	3.05623	2.47284	2.79713	67	62	77	77	74	68	86	69	78
ENSG00000279061	RP3-332O11.2	-	1:172752586-172752924	0	0	0	0	0	0	0	0	0	0	0	0	0	0	0	0	0	0
ENSG00000236427	RP11-107M16.2	-	1:152205858-152207057	0	0	0	0	0	0	0	0	0	0	0	0	0	0	0	0	0	0
ENSG00000236426	RP11-79M19.2	-	10:119330233-119336182	0	0	0	0	0	0	0	0	0	0	0	0	0	0	0	0	0	0
ENSG00000236425	AC090018.1	-	3:195561215-195561580	0	0	0	0	0	0	0	0	0	0	0	0	0	0	0	0	0	0
ENSG00000279065	RP11-264J4.10	-	13:20194412-20196005	0	0	0	0	0	0	0	0	0	0	0	0	0	0	0	0	0	0
ENSG00000136750	GAD2	glutamate decarboxylase 2 [Source:HGNC Symbol;Acc:HGNC:4093]	10:26216307-26304558	0	0	0	0	0	0	0	0	0	0	0	0	0	0	0	0	0	0
ENSG00000136754	ABI1	abl interactor 1 [Source:HGNC Symbol;Acc:HGNC:11320]	10:26746593-26861087	6.82919	7.03296	6.87023	6.69732	6.90318	6.06357	7.3134	5.84612	6.69727	1209	1422	1267	1286	1404	1061	1254	994	1138
ENSG00000136758	YME1L1	YME1 like 1 ATPase [Source:HGNC Symbol;Acc:HGNC:12843]	10:27110112-27155266	24.6839	22.5541	24.0981	21.6514	22.379	21.7916	23.6108	22.7748	22.9286	5533	5774	5627	5264	5763	4828	5126	4903	4933
ENSG00000270781	RP11-501C14.9	-	17:48899131-48899748	0.159003	0.417774	0.152641	0.293244	0.276958	0.804678	0.164238	0.496898	0.165709	1	3	1	2	2	5	1	3	1
ENSG00000270782	RP11-500K19.2	-	3:120924612-120925158	0	0	0	0	0	0	0	0	0	0	0	0	0	0	0	0	0	0
ENSG00000232508	MRPL45P1	mitochondrial ribosomal protein L45 pseudogene 1 [Source:HGNC Symbol;Acc:HGNC:29715]	2:88364695-88365608	0	0	0.150855	0	0	0.0529888	0.162261	0.218186	0	0	0	3	0	0	1	3	4	0
ENSG00000232500	AP005273.1	-	11:64500853-64505386	0	0	0	0.169093	0	0	0	0	0	0	0	0	2	0	0	0	0	0
ENSG00000232502	AC073464.7	-	2:94760774-94761116	0	0.366618	0	0.128668	0.243045	0	0	0	0	0	3	0	1	2	0	0	0	0
ENSG00000232503	CYCSP8	cytochrome c, somatic pseudogene 8 [Source:HGNC Symbol;Acc:HGNC:24423]	2:130776646-130776957	0	0	0	0	0	0	0	0	0	0	0	0	0	0	0	0	0	0
ENSG00000232504	ST3GAL5-AS1	ST3GAL5 antisense RNA 1 (head to head) [Source:HGNC Symbol;Acc:HGNC:51129]	2:85889280-85890980	0.366865	0.1606	0.410865	0.394605	0.159676	0	0.189409	0.191017	0.573378	6	3	7	7	3	0	3	3	9
ENSG00000232505	XXbac-BPG308J9.3	-	6:29223973-29290440	0	0	0	0	0	0	0	0	0	0	0	0	0	0	0	0	0	0
ENSG00000249087	ZNF436-AS1	ZNF436 antisense RNA 1 [Source:HGNC Symbol;Acc:HGNC:25122]	1:23368997-23371839	2.53695	2.56368	2.51776	3.01607	2.64826	2.62463	2.37316	2.92948	2.49412	266	307	275	343	319	272	241	295	251
ENSG00000116014	KISS1R	KISS1 receptor [Source:HGNC Symbol;Acc:HGNC:4510]	19:917287-921015	0.827513	0.458392	0.891658	0.653948	0.852599	0.888499	0.505656	0.738528	0.721397	49	31	55	42	58	52	29	42	41
ENSG00000116017	ARID3A	AT-rich interaction domain 3A [Source:HGNC Symbol;Acc:HGNC:3031]	19:925781-975934	23.1304	22.2811	21.9386	23.1965	22.6274	22.7048	23.1421	21.3606	22.7025	4263	4690	4212	4637	4791	4136	4131	3781	4016
ENSG00000116016	EPAS1	endothelial PAS domain protein 1 [Source:HGNC Symbol;Acc:HGNC:3374]	2:46293667-46386703	0.788918	1.04528	1.3103	0.981359	0.708507	0.646146	0.797298	0.830125	0.52187	189	286	327	255	195	153	185	191	120
ENSG00000249082	C5orf66-AS1	C5orf66 antisense RNA 1 [Source:HGNC Symbol;Acc:HGNC:49679]	5:135038831-135040047	0	0	0	0	0	0	0	0	0	0	0	0	0	0	0	0	0	0
ENSG00000249081	OR5M14P	olfactory receptor family 5 subfamily M member 14 pseudogene [Source:HGNC Symbol;Acc:HGNC:15057]	4:41722538-41723512	0	0	0	0	0	0	0	0	0	0	0	0	0	0	0	0	0	0
ENSG00000234034	AP000959.2	-	21:22500604-22520058	0	0	0	0	0	0	0	0	0	0	0	0	0	0	0	0	0	0
ENSG00000250567	CTD-2154H6.1	-	5:103408941-103412511	0	0	0	0	0	0	0	0	0	0	0	0	0	0	0	0	0	0
ENSG00000234033	RAC1P8	ras-related C3 botulinum toxin substrate 1 pseudogene 8 [Source:HGNC Symbol;Acc:HGNC:42005]	13:61805150-61805676	0	0	0	0	0	0	0	0	0	0	0	0	0	0	0	0	0	0
ENSG00000146676	PURB	purine-rich element binding protein B [Source:HGNC Symbol;Acc:HGNC:9702]	7:44876293-44885361	15.6742	17.8796	17.996	15.4197	15.3069	16.4778	17.5895	16.7818	17.106	2969	3868	3551	3168	3331	3085	3227	3053	3110
ENSG00000242860	RN7SL180P	RNA, 7SL, cytoplasmic 180, pseudogene [Source:HGNC Symbol;Acc:HGNC:46196]	1:62072448-62072741	0	0	0	0	0	0	0	0	0	0	0	0	0	0	0	0	0	0
ENSG00000197674	OR51C1P	olfactory receptor family 51 subfamily C member 1 pseudogene [Source:HGNC Symbol;Acc:HGNC:15191]	11:4690761-4691702	0	0	0.0975966	0.187448	0	0.0514138	0.0524795	0	0	0	0	2	4	0	1	1	0	0
ENSG00000234030	TMEM97P1	transmembrane protein 97 pseudogene 1 [Source:HGNC Symbol;Acc:HGNC:39640]	21:43783123-43783573	0	0	0	0	0.0923761	0	0.219227	0	0	0	0	0	0	1	0	2	0	0
ENSG00000187243	MAGED4B	MAGE family member D4B [Source:HGNC Symbol;Acc:HGNC:22880]	X:52061827-52069248	0.0133038	0	0.0127715	0.0163557	0.00772179	0	0	0	0	3	0	3	4	2	0	0	0	0
ENSG00000120440	TTLL2	tubulin tyrosine ligase like 2 [Source:HGNC Symbol;Acc:HGNC:21211]	6:167325086-167359503	0	0	0	0	0	0	0	0	0	0	0	0	0	0	0	0	0	0
ENSG00000249156	RP11-432M8.9	-	5:17610990-17611583	0	0	0	0	0	0	0	0	0	0	0	0	0	0	0	0	0	0
ENSG00000250560	RP11-598G2.1	-	4:75194867-75195079	0	0	0	0	0	0	0	0	0	0	0	0	0	0	0	0	0	0
ENSG00000274459	Metazoa_SRP	Metazoan signal recognition particle RNA [Source:RFAM;Acc:RF00017]	12:68575858-68576136	0	0	0	0	0	0	0	0	0	0	0	0	0	0	0	0	0	0
ENSG00000180211	RP1-278E11.3	-	6:39958414-39958833	1.36788	0.898314	0.656576	0.735657	1.6868	0.807314	1.29463	0.474814	0.712547	12	9	6	7	17	7	11	4	6
ENSG00000271259	RP11-1109F11.5	-	12:89371820-89372359	0	0	0	0	0	0	0	0	0	0	0	0	0	0	0	0	0	0
ENSG00000187244	BCAM	basal cell adhesion molecule (Lutheran blood group) [Source:HGNC Symbol;Acc:HGNC:6722]	19:44809059-44821420	0.453551	0.641179	0.621332	0.644659	0.662091	0.693092	0.614614	0.71328	0.713727	96	155	137	148	161	145	126	145	145
ENSG00000276208	RP11-168J5.2	-	13:58377513-58377774	0	0	0	0	0	0	0	0	0	0	0	0	0	0	0	0	0	0
ENSG00000271254	AC240274.1	-	KI270711.1:4612-29626	1.08904	1.19193	1.70651	1.13696	1.38707	1.19094	1.16574	1.10057	1.2431	136	170	222	154	199	147	141	132	149
ENSG00000271257	CTD-2117L12.3	-	5:58503295-58503700	0	0	0	0	0	0	0	0	0	0	0	0	0	0	0	0	0	0
ENSG00000276204	RP11-203I2.2	-	9:67328207-67329404	0	0	0	0	0	0	0	0	0	0	0	0	0	0	0	0	0	0
ENSG00000276203	ANKRD20A3	ankyrin repeat domain 20 family member A3 [Source:HGNC Symbol;Acc:HGNC:31981]	9:66106815-66153135	1.81592	2.32193	2.28843	1.93605	2.00192	2.26215	2.12679	2.04901	2.04197	454	663	596	525	575	559	515	492	490
ENSG00000276202	Metazoa_SRP	Metazoan signal recognition particle RNA [Source:RFAM;Acc:RF00017]	17:77014880-77015138	0	0	0	0.170398	0	0	0	0	0	0	0	0	1	0	0	0	0	0
ENSG00000223867	AC098592.7	-	7:16938225-16938557	0	0	0	0	0	0	0	0	0	0	0	0	0	0	0	0	0	0
ENSG00000276200	RN7SL820P	RNA, 7SL, cytoplasmic 820, pseudogene [Source:HGNC Symbol;Acc:HGNC:46836]	2:196289409-196289707	0	0	0	0	0	0	0	0	0.166817	0	0	0	0	0	0	0	0	1
ENSG00000186118	TEX38	testis expressed 38 [Source:HGNC Symbol;Acc:HGNC:29589]	1:46668855-46673594	0	0	0	0	0.0135617	0.0472967	0	0	0.0324728	0	0	0	0	1	3	0	0	2
ENSG00000270124	RP11-118F19.1	-	16:85580009-85583571	0	0	0	0	0	0	0	0	0	0	0	0	0	0	0	0	0	0
ENSG00000270127	RP11-526I2.5	-	15:100547765-100550153	1.46298	0.754535	1.44287	1.07168	1.0641	1.01381	0.993203	0.980747	0.960487	73	43	75	58	61	50	48	47	46
ENSG00000270120	RP11-327F22.6	-	16:50712844-50713589	0	0	0	0	0	0	0	0	0	0	0	0	0	0	0	0	0	0
ENSG00000174099	MSRB3	methionine sulfoxide reductase B3 [Source:HGNC Symbol;Acc:HGNC:27375]	12:65278643-65488244	0	0	0.0122829	0	0	0	0	0	0	0	0	4	0	0	0	0	0	0
ENSG00000278338	VWA8-AS1	VWA8 antisense RNA 1 (head to head) [Source:HGNC Symbol;Acc:HGNC:44270]	13:41955808-41981565	0	0	0	0	0.0839946	0.0195211	0	0.0401898	0.0603123	0	0	0	0	5	1	0	2	3
ENSG00000224233	OR2J4P	olfactory receptor family 2 subfamily J member 4 pseudogene [Source:HGNC Symbol;Acc:HGNC:8262]	6:29181510-29182445	0	0	0	0	0	0	0	0	0	0	0	0	0	0	0	0	0	0
ENSG00000235199	CYP2C58P	cytochrome P450 family 2 subfamily C member 58, pseudogene [Source:HGNC Symbol;Acc:HGNC:39969]	10:94865852-94873129	0	0	0	0	0	0	0	0	0	0	0	0	0	0	0	0	0	0
ENSG00000224235	RP5-1027O11.1	-	1:87899909-87905714	0	0	0	0	0	0	0	0	0	0	0	0	0	0	0	0	0	0
ENSG00000187969	ZCCHC13	zinc finger, CCHC domain containing 13 [Source:HGNC Symbol;Acc:HGNC:31749]	X:74304190-74305031	0	0	0	0	0	0	0	0	0	0	0	0	0	0	0	0	0	0
ENSG00000224237	MINOS1P3	mitochondrial inner membrane organizing system 1 pseudogene 3 [Source:HGNC Symbol;Acc:HGNC:44093]	3:27214816-27215018	0	0	0	0	0	0	0	0	0	0	0	0	0	0	0	0	0	0
ENSG00000224236	MRRFP1	mitochondrial ribosome recycling factor pseudogene 1 [Source:HGNC Symbol;Acc:HGNC:35238]	X:123116107-123117781	0.0571748	0.125124	0.082317	0	0.0746425	0.0289145	0.0885415	0.0892933	0.14889	2	5	3	0	3	1	3	3	5
ENSG00000224239	AC090044.2	-	3:857124-858091	0	0	0	0	0	0	0	0	0	0	0	0	0	0	0	0	0	0
ENSG00000278330	RP11-4B16.4	-	18:77112602-77115726	0	0	0	0	0	0	0	0	0	0	0	0	0	0	0	0	0	0
ENSG00000137404	NRM	nurim (nuclear envelope membrane protein) [Source:HGNC Symbol;Acc:HGNC:8003]	6:30688047-30691420	3.59726	3.87149	3.81292	4.18518	4.25881	3.92112	3.63669	4.59269	3.44669	336	413	371	424	457	362	329	412	309
ENSG00000235196	RP1-3E10.2	-	X:101911529-101912072	0	0	0	0	0	0	0	0	0	0	0	0	0	0	0	0	0	0
ENSG00000235197	ZNF33CP	zinc finger protein 33C, pseudogene [Source:HGNC Symbol;Acc:HGNC:30957]	10:37894637-37896666	0	0.0619459	0.0452887	0	0.020523	0.119314	0.0974102	0	0	0	3	2	0	1	5	4	0	0
ENSG00000264655	CTD-2267D19.4	-	17:40367952-40368438	0.0982752	0	0.377466	0.181245	0	0.0994493	0	0.102373	0	1	0	4	2	0	1	0	1	0
ENSG00000275576	RP5-836N17.4	-	20:32116171-32116629	0	0.182644	0.200296	0	0.181622	0.105516	0.107703	0.217235	0.108667	0	2	2	0	2	1	1	2	1
ENSG00000275572	GRIFIN	galectin-related inter-fiber protein [Source:HGNC Symbol;Acc:HGNC:4577]	7:2474844-2476894	0	0	0	0	0	0	0	0	0	0	0	0	0	0	0	0	0	0
ENSG00000060138	YBX3	Y-box binding protein 3 [Source:HGNC Symbol;Acc:HGNC:2428]	12:10699089-10723312	11.001	9.20496	9.31449	10.6108	10.7401	9.25272	9.57599	9.1835	11.0396	3314	3167	2923	3467	3717	2755	2794	2657	3192
ENSG00000275578	RP11-357E16.1	-	Y:17705968-17708185	0	0	0	0	0	0	0	0	0	0	0	0	0	0	0	0	0	0
ENSG00000281593	GS1-114I9.3	-	7:30362400-30412502	0	0.062938	0.0689866	0	0	0	0.222683	0	0	0	1	1	0	0	0	3	0	0
ENSG00000044012	GUCA2B	guanylate cyclase activator 2B [Source:HGNC Symbol;Acc:HGNC:4683]	1:42153421-42155824	0	0	0	0	0	0	0	0	0	0	0	0	0	0	0	0	0	0
ENSG00000231857	MORF4L1P5	mortality factor 4 like 1 pseudogene 5 [Source:HGNC Symbol;Acc:HGNC:35425]	X:65327988-65331233	0	0	0	0	0	0	0	0	0	0	0	0	0	0	0	0	0	0
ENSG00000282998	RP11-152D8.1	-	2:49202126-49451896	0	0	0	0	0	0	0	0	0	0	0	0	0	0	0	0	0	0
ENSG00000175946	KLHL38	kelch like family member 38 [Source:HGNC Symbol;Acc:HGNC:34435]	8:123645527-123652950	0	0.0211487	0	0	0.0420608	0.0488717	0	0	0	0	1	0	0	2	2	0	0	0
ENSG00000231852	CYP21A2	cytochrome P450 family 21 subfamily A member 2 [Source:HGNC Symbol;Acc:HGNC:2600]	6:32038265-32041670	0.0473186	0.0644493	0.0454253	0.0484756	0.100686	0.0265987	0.0380024	0.0711696	0.0602582	9	14	9	10	22	5	7	13	11
ENSG00000231851	UTAT33	uncharacterized LOC101927492 [Source:EntrezGene;Acc:101927492]	2:105097052-105102944	0	0	0	0	0	0	0	0	0	0	0	0	0	0	0	0	0	0
ENSG00000130751	NPAS1	neuronal PAS domain protein 1 [Source:HGNC Symbol;Acc:HGNC:7894]	19:47019820-47045775	1.36512	1.29608	1.35782	1.29651	1.2312	1.23971	0.916988	0.907622	1.46511	166	180	172	171	172	149	108	106	171
ENSG00000180818	HOXC10	homeobox C10 [Source:HGNC Symbol;Acc:HGNC:5122]	12:53985065-53990279	0.183443	0.0981535	0.156524	0.140938	0.0887058	0.0618646	0.0841711	0.190996	0.095563	18	11	16	15	10	6	8	18	9
ENSG00000231859	AC007875.2	-	7:97906429-97906822	0	0	0	0	0	0	0	0	0	0	0	0	0	0	0	0	0	0
ENSG00000130755	GMFG	glia maturation factor, gamma [Source:HGNC Symbol;Acc:HGNC:4374]	19:39328353-39342372	1.45647	1.08772	0.945799	1.18484	1.13105	0.953486	0.973026	1.27861	1.05627	102	87	69	90	91	66	66	86	71
ENSG00000233437	RP13-580B18.1	-	7:56875385-56882146	0	0	0	0	0	0	0	0	0	0	0	0	0	0	0	0	0	0
ENSG00000186115	CYP4F2	cytochrome P450 family 4 subfamily F member 2 [Source:HGNC Symbol;Acc:HGNC:2645]	19:15878023-15898120	0	0	0	0.00840793	0.039701	0	0	0.00949808	0	0	0	0	1	5	0	0	1	0
ENSG00000206150	RNASE13	ribonuclease, RNase A family, 13 (non-active) [Source:HGNC Symbol;Acc:HGNC:25285]	14:21032820-21034785	0	0	0	0	0	0	0	0	0	0	0	0	0	0	0	0	0	0
ENSG00000110756	HPS5	Hermansky-Pudlak syndrome 5 [Source:HGNC Symbol;Acc:HGNC:17022]	11:18278668-18322198	4.71123	4.70014	4.93502	4.0249	4.19112	4.4168	4.46142	3.79987	4.90333	954	1087	1041	884	975	884	875	739	953
ENSG00000248840	RP11-357G3.2	-	4:3312512-3313058	0	0	0.081175	0.155948	0.220894	0	0	0.264251	0.0881242	0	0	1	2	3	0	0	3	1
ENSG00000248842	CTB-1H10.1	-	5:146400981-146407359	0	0	0	0	0	0	0	0	0	0	0	0	0	0	0	0	0	0
ENSG00000248843	RP11-357G3.1	-	4:3323977-3324762	0.0608906	0	0	0	0	0	0	0	0	1	0	0	0	0	0	0	0	0
ENSG00000248844	RP11-626H12.3	-	11:70056230-70065371	0	0	0	0	0	0	0	0	0	0	0	0	0	0	0	0	0	0
ENSG00000248846	CTD-2016O11.1	-	5:66206212-66209447	0	0	0	0	0	0	0	0	0	0	0	0	0	0	0	0	0	0
ENSG00000248847	RP11-26C10.1	-	4:62489495-62490218	0	0	0	0	0	0	0	0	0	0	0	0	0	0	0	0	0	0
ENSG00000248848	PPBPP2	pro-platelet basic protein pseudogene 2 [Source:HGNC Symbol;Acc:HGNC:16981]	4:74054038-74055399	0	0.0245414	0	0	0.0243921	0	0	0	0	0	1	0	0	1	0	0	0	0
ENSG00000134278	SPIRE1	spire-type actin nucleation factor 1 [Source:HGNC Symbol;Acc:HGNC:30622]	18:12446512-12658134	2.83158	3.06647	3.27	3.10789	3.03611	3.16997	3.00046	2.97044	3.02776	798	987	960	950	983	883	819	804	819
ENSG00000283029	RN7SL1	RNA, 7SL, cytoplasmic 1 [Source:EntrezGene;Acc:6029]	14:49586579-49586878	0	0	0	0	0	0	0	0	0	0	0	0	0	0	0	0	0	0
ENSG00000230813	RP11-690C23.5	-	1:246527030-246528155	0	0	0	0	0	0	0	0	0	0	0	0	0	0	0	0	0	0
ENSG00000230814	USP9YP24	ubiquitin specific peptidase 9, Y-linked pseudogene 24 [Source:HGNC Symbol;Acc:HGNC:38760]	Y:22528281-22536639	0	0	0	0	0	0	0	0	0	0	0	0	0	0	0	0	0	0
ENSG00000230815	RP11-49O14.3	-	9:94824272-94824773	0.225867	0	0	0	0.196614	0.228452	0	0.117584	0	2	0	0	0	2	2	0	1	0
ENSG00000064726	BTBD1	BTB (POZ) domain containing 1 [Source:HGNC Symbol;Acc:HGNC:1120]	15:83016422-83067354	28.6962	28.4597	26.7731	26.4488	27.544	29.0513	30.5161	28.75	29.1322	3203	3628	3113	3202	3532	3205	3299	3082	3121
ENSG00000230818	MTND2P16	mitochondrially encoded NADH:ubiquinone oxidoreductase core subunit 2 pseudogene 16 [Source:HGNC Symbol;Acc:HGNC:42117]	10:19747823-19748621	0	0	0	0	0	0	0	0	0	0	0	0	0	0	0	0	0	0
ENSG00000230819	ZNF736P5Y	zinc finger protein 736 pseudogene 5, Y-linked [Source:HGNC Symbol;Acc:HGNC:38597]	Y:25018499-25019303	0	0	0	0	0	0	0	0	0	0	0	0	0	0	0	0	0	0
ENSG00000217791	ASS1P9	argininosuccinate synthetase 1 pseudogene 9 [Source:HGNC Symbol;Acc:HGNC:772]	5:53859166-53860401	0	0	0	0	0	0	0	0	0	0	0	0	0	0	0	0	0	0
ENSG00000072506	HSD17B10	hydroxysteroid (17-beta) dehydrogenase 10 [Source:HGNC Symbol;Acc:HGNC:4800]	X:53431258-53434373	61.3962	49.9014	49.3524	55.9917	54.0881	47.8183	44.7536	47.5316	48.8953	2398	2226	2008	2372	2427	1846	1693	1783	1833
ENSG00000181135	ZNF707	zinc finger protein 707 [Source:HGNC Symbol;Acc:HGNC:27815]	8:143684452-143713898	0.429336	0.487893	0.186342	0.368463	0.449249	0.434376	0.290016	0.451785	0.518689	188	244	85	175	226	188	123	190	218
ENSG00000134183	GNAT2	guanine nucleotide binding protein (G protein), alpha transducing activity polypeptide 2 [Source:HGNC Symbol;Acc:HGNC:4394]	1:109603267-109619929	0	0.207022	0	0.081755	0.0514596	0	0.213611	0.1231	0.123156	0	8	0	3	2	0	7	4	4
ENSG00000069712	KIAA1107	KIAA1107 [Source:HGNC Symbol;Acc:HGNC:29192]	1:92167052-92184723	1.18749	1.21456	1.51319	1.07545	0.95131	1.66924	1.24775	1.24737	1.2591	113	132	150	111	104	157	115	114	115
ENSG00000270587	RP11-51F16.9	-	17:63610772-63611184	0	0	0	0	0	0	0	0	0	0	0	0	0	0	0	0	0	0
ENSG00000134186	PRPF38B	pre-mRNA processing factor 38B [Source:HGNC Symbol;Acc:HGNC:25512]	1:108692323-108701803	9.58326	11.1798	11.6552	8.83547	9.58668	10.9425	10.4	10.0584	10.5462	1742	2321	2207	1742	2002	1966	1831	1756	1840
ENSG00000134184	GSTM1	glutathione S-transferase mu 1 [Source:HGNC Symbol;Acc:HGNC:4632]	1:109687814-109709039	0.0311422	0.0181772	0.00996207	0.00956921	0.00903331	0.0105013	0.0107189	0.0216199	0.0108149	3	2	1	1	1	1	1	2	1
ENSG00000262712	RP11-295D4.1	-	16:4335870-4337818	1.10545	1.01092	1.81578	0.883296	0.962212	1.11841	1.01451	1.09984	1.02375	45	47	77	39	45	45	40	43	40
ENSG00000262714	RP11-44F14.8	-	16:53386944-53389085	0	0	0	0	0	0	0	0	0	0	0	0	0	0	0	0	0	0
ENSG00000248211	TRPC7-AS1	TRPC7 antisense RNA 1 [Source:HGNC Symbol;Acc:HGNC:40936]	5:136214048-136222159	0	0	0	0	0	0	0	0	0	0	0	0	0	0	0	0	0	0
ENSG00000248210	RP11-24I21.1	-	4:149154295-149278123	0	0.0166336	0	0	0.0165324	0	0	0	0	0	1	0	0	1	0	0	0	0
ENSG00000248213	CICP16	capicua transcriptional repressor pseudogene 16 [Source:HGNC Symbol;Acc:HGNC:38550]	4:118635970-118638782	0	0	0	0	0	0	0	0	0	0	0	0	0	0	0	0	0	0
ENSG00000037042	TUBG2	tubulin gamma 2 [Source:HGNC Symbol;Acc:HGNC:12419]	17:42659305-42667006	1.61108	1.31417	1.53334	1.54883	1.39036	1.10059	1.47856	1.01796	1.43464	117	109	116	122	116	79	104	71	100
ENSG00000260622	RP11-690I21.3	-	2:231810348-231810844	0	0	0	0	0	0	0	0	0	0	0	0	0	0	0	0	0	0
ENSG00000260620	RP11-883G14.4	-	16:51054728-51056399	0	0	0	0	0	0	0	0	0	0	0	0	0	0	0	0	0	0
ENSG00000260621	RP11-413H22.2	-	16:56409320-56411683	0	0	0	0	0	0	0	0	0	0	0	0	0	0	0	0	0	0
ENSG00000260626	RP11-23E10.3	-	16:33533816-33534976	0	0	0	0	0	0	0	0	0	0	0	0	0	0	0	0	0	0
ENSG00000078487	ZCWPW1	zinc finger, CW type with PWWP domain 1 [Source:HGNC Symbol;Acc:HGNC:23486]	7:100400826-100428992	0.222324	0.307688	0.275381	0.231421	0.17479	0.203166	0.140687	0.350959	0.164383	31	49	40	35	28	28	19	47	22
ENSG00000260625	RP11-452L6.7	-	16:31508471-31509256	0.584769	0.704008	0.631516	1.14564	0.699913	0.813508	0.98109	0.913305	1.29463	8	11	9	17	11	11	13	12	17
ENSG00000248215	RP11-722M1.1	-	4:36496537-36641900	0.93012	1.97491	1.40627	1.3935	1.4573	1.34097	1.34444	2.08216	1.93811	40	97	63	65	72	57	56	86	80
ENSG00000260628	RP11-1166P10.1	-	16:31975803-32003728	0	0	0	0.014168	0	0	0	0.016005	0	0	0	0	1	0	0	0	1	0
ENSG00000260629	BGLT3	beta globin locus transcript 3 (non-protein coding) [Source:HGNC Symbol;Acc:HGNC:49033]	11:5244554-5245547	11.7527	11.5135	12.0219	15.2764	13.668	17.3	16.3117	13.6914	17.1125	244	273	260	344	326	355	328	273	341
ENSG00000042753	AP2S1	adaptor related protein complex 2 sigma 1 subunit [Source:HGNC Symbol;Acc:HGNC:565]	19:46838136-46850992	17.8437	15.1983	13.579	14.9703	15.6294	13.9462	12.612	13.8597	16.0609	1433	1394	1136	1304	1442	1107	981	1069	1238
ENSG00000196096	AC079610.2	-	2:213276552-213284205	0	0	0	0	0	0	0	0	0.0577629	0	0	0	0	0	0	0	0	2
ENSG00000248216	KCTD9P5	potassium channel tetramerization domain containing 9 pseudogene 5 [Source:HGNC Symbol;Acc:HGNC:49914]	5:37505688-37506857	0.0818528	0.322472	0.0785778	0.0754414	0.0356082	0.165621	0.126758	0.170446	0.085262	2	9	2	2	1	4	3	4	2
ENSG00000105855	ITGB8	integrin subunit beta 8 [Source:HGNC Symbol;Acc:HGNC:6163]	7:20330702-20415754	0	0	0.00517599	0	0	0.00272671	0	0	0	0	0	2	0	0	1	0	0	0
ENSG00000105854	PON2	paraoxonase 2 [Source:HGNC Symbol;Acc:HGNC:9205]	7:95404863-95435329	1.48245	1.61267	1.44226	1.51404	1.62493	1.48471	1.78827	1.6267	1.85134	297	369	301	329	374	294	347	313	356
ENSG00000111481	COPZ1	coatomer protein complex subunit zeta 1 [Source:HGNC Symbol;Acc:HGNC:2243]	12:54301202-54351849	27.9977	26.282	27.111	27.3725	28.1599	26.8863	25.1252	29.4801	28.2825	4701	5040	4742	4985	5432	4462	4086	4754	4558
ENSG00000105856	HBP1	HMG-box transcription factor 1 [Source:HGNC Symbol;Acc:HGNC:23200]	7:107168961-107202529	4.1638	4.43467	3.55888	3.35949	3.98021	3.37337	3.55314	3.95517	3.53171	1049	1276	934	918	1152	840	867	957	854
ENSG00000105851	PIK3CG	phosphatidylinositol-4,5-bisphosphate 3-kinase catalytic subunit gamma [Source:HGNC Symbol;Acc:HGNC:8978]	7:106865278-106907145	6.89316	9.43955	8.40361	6.78916	6.77279	6.7198	6.80229	6.98791	5.98387	1289	2016	1637	1377	1455	1242	1232	1255	1074
ENSG00000079689	SCGN	secretagogin, EF-hand calcium binding protein [Source:HGNC Symbol;Acc:HGNC:16941]	6:25652201-25701783	0	0	0.109822	0	0	0.077171	0.0590629	0.0794193	0.0794556	0	0	6	0	0	4	3	4	4
ENSG00000105852	PON3	paraoxonase 3 [Source:HGNC Symbol;Acc:HGNC:9206]	7:95359944-95396368	0.0176303	0.0154332	0	0	0.00766967	0.017832	0	0	0.00918231	2	2	0	0	1	2	0	0	1
ENSG00000142252	GEMIN7	gem nuclear organelle associated protein 7 [Source:HGNC Symbol;Acc:HGNC:20045]	19:45079195-45091524	5.30505	3.62331	3.77616	4.41418	4.49208	4.36933	3.83785	4.0582	4.32396	441	344	327	398	429	359	309	324	345
ENSG00000012174	MBTPS2	membrane bound transcription factor peptidase, site 2 [Source:HGNC Symbol;Acc:HGNC:15455]	X:21839636-21885424	2.5634	2.98658	3.11564	3.35924	2.88808	3.26279	3.31365	3.24482	3.27379	496	660	628	705	642	624	621	603	608
ENSG00000131002	TXLNGY	taxilin gamma pseudogene, Y-linked [Source:HGNC Symbol;Acc:HGNC:18473]	Y:19567313-19606274	0	0	0	0	0	0	0	0	0	0	0	0	0	0	0	0	0	0
ENSG00000012171	SEMA3B	sema domain, immunoglobulin domain (Ig), short basic domain, secreted, (semaphorin) 3B [Source:HGNC Symbol;Acc:HGNC:10724]	3:50267558-50277546	0.189323	0.149425	0.104951	0.113089	0.0998066	0.091728	0.129397	0.11661	0.0777885	71	64	41	46	43	34	47	42	28
ENSG00000220447	RP1-276J11.2	-	6:121381472-121381860	0	0	0	0	0	0	0	0	0	0	0	0	0	0	0	0	0	0
ENSG00000131007	TTTY9B	testis-specific transcript, Y-linked 9B (non-protein coding) [Source:HGNC Symbol;Acc:HGNC:32425]	Y:18581206-18590521	0	0	0	0	0	0	0	0	0	0	0	0	0	0	0	0	0	0
ENSG00000135587	SMPD2	sphingomyelin phosphodiesterase 2 [Source:HGNC Symbol;Acc:HGNC:11121]	6:109440763-109443919	6.49869	4.95252	5.58381	6.08406	5.84879	6.10826	5.92279	6.41148	5.07808	324	282	290	329	335	301	286	307	243
ENSG00000084710	EFR3B	EFR3 homolog B [Source:HGNC Symbol;Acc:HGNC:29155]	2:25042130-25159137	0	0.00682627	0	0.014378	0.00678809	0	0	0.00405956	0	0	2	0	4	2	0	0	1	0
ENSG00000257022	RP11-729I10.2	-	12:21827210-21887957	0	0	0	0	0	0	0	0	0	0	0	0	0	0	0	0	0	0
ENSG00000214110	LDHAP4	lactate dehydrogenase A pseudogene 4 [Source:HGNC Symbol;Acc:HGNC:6539]	9:14921337-14922334	15.9273	16.9279	15.4737	14.5518	15.6176	16.3085	14.6118	14.3359	15.8943	332	403	336	329	374	336	295	287	318
ENSG00000196098	OR5K4	olfactory receptor family 5 subfamily K member 4 [Source:HGNC Symbol;Acc:HGNC:31291]	3:98353854-98354819	0	0	0	0	0	0	0	0	0	0	0	0	0	0	0	0	0	0
ENSG00000071082	RPL31	ribosomal protein L31 [Source:HGNC Symbol;Acc:HGNC:10334]	2:101001715-101024032	29.6013	24.5032	23.2192	24.7547	25.9609	23.3627	24.7307	24.7071	29.9084	5293	5004	4325	4801	5333	4129	4283	4243	5133
ENSG00000124490	CRISP2	cysteine-rich secretory protein 2 [Source:HGNC Symbol;Acc:HGNC:12024]	6:49692358-49713590	0	0	0.0616641	0	0	0	0	0	0	0	0	3	0	0	0	0	0	0
ENSG00000139780	METTL21C	methyltransferase like 21C [Source:HGNC Symbol;Acc:HGNC:33717]	13:102685744-102694504	0	0	0	0	0	0	0	0	0	0	0	0	0	0	0	0	0	0
ENSG00000180660	MAB21L1	mab-21-like 1 (C. elegans) [Source:HGNC Symbol;Acc:HGNC:6757]	13:35474182-35477209	0	0.013843	0	0	0	0	0.0163262	0.0164648	0	0	1	0	0	0	0	1	1	0
ENSG00000135638	EMX1	empty spiracles homeobox 1 [Source:HGNC Symbol;Acc:HGNC:3340]	2:72916260-72936071	0.0726192	0.0195621	0.0589872	0.0566506	0.0534877	0.0339097	0.0749754	0.0872455	0.0989361	13	4	11	11	11	6	13	15	17
ENSG00000180662	RPL21P8	ribosomal protein L21 pseudogene 8 [Source:HGNC Symbol;Acc:HGNC:19779]	14:65467807-65468341	0.0894579	0	0	0	0	0	0	0	0	1	0	0	0	0	0	0	0	0
ENSG00000180667	YOD1	YOD1 deubiquitinase [Source:HGNC Symbol;Acc:HGNC:25035]	1:207043849-207052980	61.4363	66.3166	70.1826	56.5566	56.003	62.3825	61.1747	55.7903	60.4023	8573	10569	10202	8560	8978	8604	8268	7477	8090
ENSG00000188419	CHM	choroideremia (Rab escort protein 1) [Source:HGNC Symbol;Acc:HGNC:1940]	X:85861180-86047562	0.91929	1.03213	0.945813	0.888111	0.796357	0.965684	0.87648	0.957173	0.847794	209	268	224	219	208	217	193	209	185
ENSG00000135632	SMYD5	SMYD family member 5 [Source:HGNC Symbol;Acc:HGNC:16258]	2:73214222-73227237	13.5463	12.834	12.2831	13.7632	13.9787	13.5028	12.6114	12.3637	11.9021	1353	1464	1278	1491	1604	1333	1220	1186	1141
ENSG00000135631	RAB11FIP5	RAB11 family interacting protein 5 (class I) [Source:HGNC Symbol;Acc:HGNC:24845]	2:73073382-73156721	4.73	5.58317	2.50346	2.14981	5.03854	4.81657	5.31652	5.20178	4.90139	925	1247	510	456	1132	931	1007	977	920
ENSG00000135636	DYSF	dysferlin [Source:HGNC Symbol;Acc:HGNC:3097]	2:71453722-71686768	0.323825	0.490894	0.361892	0.485713	0.530084	0.454764	0.384242	0.39756	0.342416	67	116	78	109	126	93	77	79	68
ENSG00000135637	CCDC142	coiled-coil domain containing 142 [Source:HGNC Symbol;Acc:HGNC:25889]	2:74471986-74483408	0.913826	0.984449	0.877235	0.886631	0.770444	1.03105	0.869405	0.926577	0.882299	191	235	191	201	185	213	176	186	177
ENSG00000147155	EBP	emopamil binding protein (sterol isomerase) [Source:HGNC Symbol;Acc:HGNC:3133]	X:48521158-48528716	15.0024	9.9042	12.9254	14.2833	12.0374	8.78211	11.8906	11.9794	10.1592	1317	993	1182	1360	1214	762	1011	1010	856
ENSG00000112539	C6orf118	chromosome 6 open reading frame 118 [Source:HGNC Symbol;Acc:HGNC:21233]	6:165279664-165309607	0	0	0	0	0	0	0	0	0	0	0	0	0	0	0	0	0	0
ENSG00000263443	RP11-973F15.2	-	8:122700269-122703423	0	0	0	0	0	0	0	0	0	0	0	0	0	0	0	0	0	0
ENSG00000114503	NCBP2	nuclear cap binding protein subunit 2 [Source:HGNC Symbol;Acc:HGNC:7659]	3:196935402-196942597	7.86582	7.22772	7.4983	6.78983	7.15772	6.84753	6.98784	7.29298	7.64579	2730	2865	2711	2556	2854	2349	2349	2431	2547
ENSG00000258629	CTD-2014B16.1	-	14:65879592-65881070	0	0	0	0	0.0281688	0.0327463	0	0	0	0	0	0	0	1	1	0	0	0
ENSG00000184992	BRI3BP	BRI3 binding protein [Source:HGNC Symbol;Acc:HGNC:14251]	12:124993700-125031231	15.3615	14.8942	16.6061	14.6409	14.2991	15.1776	15.5927	14.8023	14.1288	2133	2362	2402	2205	2281	2083	2097	1974	1883
ENSG00000116670	MAD2L2	MAD2 mitotic arrest deficient-like 2 (yeast) [Source:HGNC Symbol;Acc:HGNC:6764]	1:11674480-11691650	21.7747	18.4193	18.1168	21.0083	19.365	18.9682	18.0984	18.0616	19.2998	2626	2537	2276	2748	2683	2261	2114	2092	2234
ENSG00000259767	RP11-90B9.2	-	15:83022236-83024336	0.210942	0.184655	0.101201	0.0972097	0.183622	0.213356	0.326667	0.329441	0.109864	2	2	1	1	2	2	3	3	1
ENSG00000224296	MRPL49P1	mitochondrial ribosomal protein L49 pseudogene 1 [Source:HGNC Symbol;Acc:HGNC:29717]	5:64674853-64675387	0	0	0	0	0	0	0	0	0	0	0	0	0	0	0	0	0	0
ENSG00000115677	HDLBP	high density lipoprotein binding protein [Source:HGNC Symbol;Acc:HGNC:4857]	2:241227264-241317061	13.041	12.8728	14.2715	11.7814	12.8242	12.5848	11.925	13.432	11.9387	7600	8568	8664	7447	8586	7249	6731	7518	6678
ENSG00000259763	RP11-327J17.1	-	15:96235785-96236703	0	0	0	0	0	0	0	0	0	0	0	0	0	0	0	0	0	0
ENSG00000259762	RP11-158M2.4	-	15:85750336-85752901	0	0	0	0	0	0	0	0	0	0	0	0	0	0	0	0	0	0
ENSG00000259761	RP11-138H10.2	-	15:87042054-87047161	0	0	0	0	0	0	0	0	0	0	0	0	0	0	0	0	0	0
ENSG00000259760	RP11-20G13.2	-	15:99396613-99401315	0	0	0	0	0	0	0	0	0	0	0	0	0	0	0	0	0	0
ENSG00000259769	RP11-1360M22.2	-	15:20046296-20047994	0	0	0	0	0	0	0	0	0	0	0	0	0	0	0	0	0	0
ENSG00000259768	RP5-991G20.1	-	16:72665170-72791624	5.033	5.72277	5.12572	5.73425	6.00764	5.70234	6.63592	6.48616	6.15029	509	661	540	629	698	570	650	630	597
ENSG00000261971	MMP25-AS1	MMP25 antisense RNA 1 [Source:HGNC Symbol;Acc:HGNC:51372]	16:3051096-3059370	0.627494	0.664299	0.558561	0.757351	0.695161	0.796463	0.64198	0.558317	0.713195	110	133	102	144	140	138	109	94	120
ENSG00000250038	RP11-180C1.1	-	4:28362279-28402864	0	0.0619154	0.0678995	0.0651894	0.061569	0.0357694	0	0	0	0	2	2	2	2	1	0	0	0
ENSG00000258624	SERPINE4P	serpin peptidase inhibitor, clade E (nexin, plasminogen activator inhibitor type 1), member 4 pseudogene [Source:HGNC Symbol;Acc:HGNC:44400]	15:27340524-27340804	0	0	0	0	0.148262	0	0.175928	0.177421	0.177503	0	0	0	0	1	0	1	1	1
ENSG00000261978	CTD-2529O21.2	-	17:80023894-80026107	0	0	0	0	0	0	0	0	0	0	0	0	0	0	0	0	0	0
ENSG00000267593	RP11-108P20.4	-	18:58813880-58834364	0	0	0	0	0	0	0	0	0	0	0	0	0	0	0	0	0	0
ENSG00000116852	KIF21B	kinesin family member 21B [Source:HGNC Symbol;Acc:HGNC:29442]	1:200969390-201023700	6.01553	7.42497	7.41074	6.73345	7.20614	6.81313	6.32556	6.32849	6.02146	1733	2443	2224	2104	2385	1940	1765	1751	1665
ENSG00000226284	ARPC3P1	actin related protein 2/3 complex subunit 3 pseudogene 1 [Source:HGNC Symbol;Acc:HGNC:16092]	20:49134480-49135012	0.359264	0.235929	0.603578	0.579692	0.312735	0.272599	0.649249	0.654667	0.655157	4	3	7	7	4	3	7	7	7
ENSG00000267594	CYP4F24P	cytochrome P450 family 4 subfamily F member 24, pseudogene [Source:HGNC Symbol;Acc:HGNC:39945]	19:15760241-15779909	0	0	0	0	0	0	0	0	0	0	0	0	0	0	0	0	0	0
ENSG00000267597	RPIAP1	ribose 5-phosphate isomerase A pseudogene 1 [Source:HGNC Symbol;Acc:HGNC:27250]	18:61957273-61958014	0	0.0564915	0	0	0	0	0	0.0671906	0	0	1	0	0	0	0	0	1	0
ENSG00000263196	MTND3P13	mitochondrially encoded NADH:ubiquinone oxidoreductase core subunit 3 pseudogene 13 [Source:HGNC Symbol;Acc:HGNC:52073]	16:10723424-10723766	0	0	0	0	0	0	0	0	0	0	0	0	0	0	0	0	0	0
ENSG00000263199	RP11-372K20.1	-	17:54702936-54703430	0	0	0	0	0	0	0	0	0	0	0	0	0	0	0	0	0	0
ENSG00000219747	RP1-292B18.1	-	6:151099529-151099933	10.1666	6.83159	6.12805	8.2834	6.89431	5.86062	8.17776	7.38537	7.75947	86	66	54	76	67	49	67	60	63
ENSG00000267733	RP11-64C12.3	-	18:12201982-12223539	0.19015	0.142707	0.117346	0.150265	0.130055	0.0961906	0.126205	0.0989894	0.169813	14	12	9	12	11	7	9	7	12
ENSG00000125255	SLC10A2	solute carrier family 10 (sodium/bile acid cotransporter), member 2 [Source:HGNC Symbol;Acc:HGNC:10906]	13:103043998-103066846	0	0	0	0	0	0	0	0	0	0	0	0	0	0	0	0	0	0
ENSG00000227258	SMIM2-AS1	SMIM2 antisense RNA 1 [Source:HGNC Symbol;Acc:HGNC:42674]	13:44110451-44240517	0	0	0	0	0	0	0	0	0	0	0	0	0	0	0	0	0	0
ENSG00000227256	MIS18A-AS1	MIS18A antisense RNA 1 [Source:HGNC Symbol;Acc:HGNC:40106]	21:32277863-32280988	0.0622367	0.327102	0.179299	0.344399	0.379342	0.314965	0.385714	0.777913	0.129722	1	6	3	6	7	5	6	12	2
ENSG00000227257	RP11-330M2.3	-	9:96918928-96919318	0	0	0	0	0	0	0	0	0	0	0	0	0	0	0	0	0	0
ENSG00000227254	VDAC1P12	voltage-dependent anion channel 1 pseudogene 12 [Source:HGNC Symbol;Acc:HGNC:39680]	13:34082429-34083310	0	0	0	0	0	0	0	0	0	0	0	0	0	0	0	0	0	0
ENSG00000227255	CDRT15P2	CMT1A duplicated region transcript 15 pseudogene 2 [Source:HGNC Symbol;Acc:HGNC:34074]	17:15764703-15765664	0	0	0	0	0	0	0	0	0	0	0	0	0	0	0	0	0	0
ENSG00000227252	AC105760.2	-	2:237059434-237085817	0.245413	0.214883	0.25522	0.433696	0.37385	0.31037	0.654595	0.596241	0.36223	12	12	13	23	21	15	31	28	17
ENSG00000227253	RP11-166N17.1	-	10:32266289-32269474	0	0	0	0	0	0	0	0	0	0	0	0	0	0	0	0	0	0
ENSG00000267734	RP4-604K5.3	-	1:86932199-86934891	0	0	0	0	0	0	0	0	0	0	0	0	0	0	0	0	0	0
ENSG00000105143	SLC1A6	solute carrier family 1 (high affinity aspartate/glutamate transporter), member 6 [Source:HGNC Symbol;Acc:HGNC:10944]	19:14950034-15022990	0	0	0	0	0	0	0	0	0	0	0	0	0	0	0	0	0	0
ENSG00000105141	CASP14	caspase 14 [Source:HGNC Symbol;Acc:HGNC:1502]	19:15049384-15058293	0	0	0	0	0	0	0	0	0	0	0	0	0	0	0	0	0	0
ENSG00000105146	AURKC	aurora kinase C [Source:HGNC Symbol;Acc:HGNC:11391]	19:57230802-57235548	1.5976	1.77332	1.53363	1.1366	1.57677	1.52727	1.64948	2.10877	1.45479	127	161	127	98	144	120	127	161	111
ENSG00000267630	AC005758.1	-	19:27918943-27929370	0	0	0	0	0	0	0	0	0	0	0	0	0	0	0	0	0	0
ENSG00000267631	CGB1	chorionic gonadotropin, beta polypeptide 1 [Source:HGNC Symbol;Acc:HGNC:16721]	19:49035610-49036895	0.0804096	0	0	0	0	0.121994	0	0	0	2	0	0	0	0	3	0	0	0
ENSG00000267632	RP11-400F19.18	-	17:42509784-42511519	1.57202	2.43894	3.01816	2.97499	2.78472	2.62291	3.16072	2.69928	3.27568	57	101	114	117	116	94	111	94	114
ENSG00000267633	CTB-5E10.3	-	19:13772118-13774118	0	0	0	0	0	0	0	0	0	0	0	0	0	0	0	0	0	0
ENSG00000267634	RPL7L1P5	ribosomal protein L7 like 1 pseudogene 5 [Source:HGNC Symbol;Acc:HGNC:39487]	17:44365014-44365751	0	0	0	0	0	0	0	0	0	0	0	0	0	0	0	0	0	0
ENSG00000267636	AC008992.1	-	19:31421997-31427302	0	0	0	0	0	0	0	0	0	0	0	0	0	0	0	0	0	0
ENSG00000267637	RP11-619I22.1	-	17:59784813-59785035	0.214619	0	0.206032	0.197907	0.186824	0	0.221685	0.223567	0	1	0	1	1	1	0	1	1	0
ENSG00000186543	CROCCP5	ciliary rootlet coiled-coil, rootletin pseudogene 5 [Source:HGNC Symbol;Acc:HGNC:43865]	1:21434318-21437558	0	0	0	0	0	0	0	0	0	0	0	0	0	0	0	0	0	0
ENSG00000235949	AC061961.2	-	2:154696462-154697817	0	0	0	0	0	0	0	0	0	0	0	0	0	0	0	0	0	0
ENSG00000211798	TRAV18	T cell receptor alpha variable 18 [Source:HGNC Symbol;Acc:HGNC:12114]	14:22003106-22003673	0	0	0	0	0.0946855	0	0	0	0	0	0	0	0	1	0	0	0	0
ENSG00000235940	MTND1P21	mitochondrially encoded NADH:ubiquinone oxidoreductase core subunit 1 pseudogene 21 [Source:HGNC Symbol;Acc:HGNC:42070]	10:20804293-20804577	0	0	0	0	0	0	0	0	0	0	0	0	0	0	0	0	0	0
ENSG00000235943	TMEM212-IT1	TMEM212 intronic transcript 1 [Source:HGNC Symbol;Acc:HGNC:41505]	3:171894436-171895240	0	0	0	0	0	0	0	0	0	0	0	0	0	0	0	0	0	0
ENSG00000235942	LCE6A	late cornified envelope 6A [Source:HGNC Symbol;Acc:HGNC:31824]	1:152842868-152843983	0	0	0	0	0	0	0	0	0	0	0	0	0	0	0	0	0	0
ENSG00000146205	ANO7	anoctamin 7 [Source:HGNC Symbol;Acc:HGNC:31677]	2:241188509-241225377	0.197746	0.24783	0.238216	0.339608	0.347628	0.309909	0.260214	0.246265	0.258541	51	73	64	95	103	79	65	61	64
ENSG00000235944	ZNF815P	zinc finger protein 815, pseudogene [Source:HGNC Symbol;Acc:HGNC:22029]	7:5823160-5854435	0.724456	0.378363	0.86626	0.902286	0.575287	0.501496	0.380551	0.463177	0.940181	57	34	71	77	52	39	29	35	71
ENSG00000235947	EGOT	eosinophil granule ontogeny transcript (non-protein coding) [Source:HGNC Symbol;Acc:HGNC:37129]	3:4749192-4751590	0	0	0	0	0	0	0	0	0	0	0	0	0	0	0	0	0	0
ENSG00000235946	LL0XNC01-240C2.1	-	X:104062542-104063037	0	0	0	0	0	0	0	0	0	0	0	0	0	0	0	0	0	0
ENSG00000164418	GRIK2	glutamate receptor, ionotropic, kainate 2 [Source:HGNC Symbol;Acc:HGNC:4580]	6:101398788-102070083	0	0	0	0	0	0	0.0105227	0	0	0	0	0	0	0	0	2	0	0
ENSG00000242509	RN7SL156P	RNA, 7SL, cytoplasmic 156, pseudogene [Source:HGNC Symbol;Acc:HGNC:46172]	20:36870099-36870402	0	0	0	0	0	0	0	0	0	0	0	0	0	0	0	0	0	0
ENSG00000164411	GJB7	gap junction protein beta 7 [Source:HGNC Symbol;Acc:HGNC:16690]	6:87282978-87329278	0.0173461	0.0151845	0.0332958	0.0079937	0.00754603	0	0	0.0180603	0	2	2	4	1	1	0	0	2	0
ENSG00000164414	SLC35A1	solute carrier family 35 (CMP-sialic acid transporter), member A1 [Source:HGNC Symbol;Acc:HGNC:11021]	6:87470623-87512336	2.47186	2.10363	2.60573	1.33118	1.5584	1.53092	2.36131	2.95858	1.57649	214	208	235	125	155	131	198	246	131
ENSG00000280163	CTC-277H1.6	-	16:67205175-67206849	0.0285731	0.0250249	0.0274299	0	0.0497698	0	0	0	0	1	1	1	0	2	0	0	0	0
ENSG00000222154	RN7SKP218	RNA, 7SK small nuclear pseudogene 218 [Source:HGNC Symbol;Acc:HGNC:45942]	7:53490148-53490439	0	0	0	0	0	0	0	0	0	0	0	0	0	0	0	0	0	0
ENSG00000100532	CGRRF1	cell growth regulator with ring finger domain 1 [Source:HGNC Symbol;Acc:HGNC:15528]	14:54509812-54539309	0.634103	0.623949	0.411604	0.540079	0.273348	0.537681	0.542458	0.396139	0.471894	105	118	71	97	52	88	87	63	75
ENSG00000198937	CCDC167	coiled-coil domain containing 167 [Source:HGNC Symbol;Acc:HGNC:21239]	6:37482920-37499922	31.1708	27.6311	27.6209	29.523	25.3819	30.05	25.7145	21.8248	33.7652	403	408	372	414	377	384	322	271	419
ENSG00000077454	LRCH4	leucine-rich repeats and calponin homology (CH) domain containing 4 [Source:HGNC Symbol;Acc:HGNC:6691]	7:100574011-100586153	4.47456	4.96259	4.49661	4.06966	4.32994	4.58012	4.1662	4.1385	4.1663	1110	1406	1162	1095	1234	1123	1001	986	992
ENSG00000186265	BTLA	B and T lymphocyte associated [Source:HGNC Symbol;Acc:HGNC:21087]	3:112463968-112499561	0	0	0	0	0	0	0	0	0	0	0	0	0	0	0	0	0	0
ENSG00000273419	RP4-751H13.7	-	7:149858400-149862492	0.0116931	0.0102411	0	0	0.0509139	0.0118328	0.0483124	0	0	1	1	0	0	5	1	4	0	0
ENSG00000077458	FAM76B	family with sequence similarity 76 member B [Source:HGNC Symbol;Acc:HGNC:28492]	11:95768942-95790409	2.92603	3.07259	2.63311	2.67896	2.88929	2.85405	3.23809	2.70065	3.13332	863	1035	809	857	979	832	925	765	887
ENSG00000226285	AC091813.2	-	7:79543911-79544853	0	0	0	0	0	0	0	0	0	0	0	0	0	0	0	0	0	0
ENSG00000259168	RP11-100M12.3	-	15:27483035-27541991	0	0	0	0	0	0	0	0	0	0	0	0	0	0	0	0	0	0
ENSG00000224540	RP11-385M4.3	-	1:209232196-209233419	0	0	0	0	0	0	0	0	0	0	0	0	0	0	0	0	0	0
ENSG00000262953	EIF4A1P9	eukaryotic translation initiation factor 4A1 pseudogene 9 [Source:HGNC Symbol;Acc:HGNC:37928]	17:2586330-2587866	0	0	0	0	0	0	0	0	0	0	0	0	0	0	0	0	0	0
ENSG00000212658	KRTAP29-1	keratin associated protein 29-1 [Source:HGNC Symbol;Acc:HGNC:34211]	17:41301826-41302851	0	0	0	0	0	0	0	0	0	0	0	0	0	0	0	0	0	0
ENSG00000212659	KRTAP9-6	keratin associated protein 9-6 [Source:HGNC Symbol;Acc:HGNC:18914]	17:41265339-41266641	0	0	0	0	0	0	0	0	0	0	0	0	0	0	0	0	0	0
ENSG00000265908	RP11-20B24.6	-	17:28944796-28945394	0	0	0	0	0	0	0	0	0	0	0	0	0	0	0	0	0	0
ENSG00000265905	RN7SL96P	RNA, 7SL, cytoplasmic 96, pseudogene [Source:HGNC Symbol;Acc:HGNC:46112]	2:38936876-38937158	0	0	0	0	0	0	0	0	0	0	0	0	0	0	0	0	0	0
ENSG00000152056	AP1S3	adaptor related protein complex 1 sigma 3 subunit [Source:HGNC Symbol;Acc:HGNC:18971]	2:223751686-223838027	0.243456	0.330969	0.276758	0.324877	0.25095	0.311136	0.383657	0.446944	0.347099	38	59	45	55	45	48	58	67	52
ENSG00000212657	KRTAP16-1	keratin associated protein 16-1 [Source:HGNC Symbol;Acc:HGNC:18916]	17:41307700-41309253	0	0	0	0	0	0	0	0	0	0	0	0	0	0	0	0	0	0
ENSG00000253140	RP11-567J20.3	-	8:48515852-48517089	0.0891248	0.312229	0.34232	0.246635	0	0.270569	0	0.464203	0	1	4	4	3	0	3	0	5	0
ENSG00000260367	RP11-264B17.4	-	16:28973962-28978824	0	0	0	0	0	0.131107	0	0.0337317	0.0337471	0	0	0	0	0	4	0	1	1
ENSG00000260366	CTD-2639E6.4	-	19:48926171-48926444	0	0.152981	0.167683	0.32214	0	0.353517	0	0	0.364075	0	1	1	2	0	2	0	0	2
ENSG00000260364	RP11-256I9.3	-	16:65233056-65432820	0	0	0	0	0	0	0	0	0	0	0	0	0	0	0	0	0	0
ENSG00000260362	RP11-297M9.1	-	16:9666885-9676843	0	0	0	0	0	0	0	0	0	0	0	0	0	0	0	0	0	0
ENSG00000260361	CTD-2313J17.5	-	15:92779757-92781492	0	0.144897	0.211808	0.101714	0.120041	0	0.170861	0.114874	0.373542	0	6	8	4	5	0	6	4	13
ENSG00000280160	RP11-196G11.3	-	16:31093727-31095944	0	0	0	0	0.0187834	0.0218358	0	0	0	0	0	0	0	1	1	0	0	0
ENSG00000260369	CTD-2526A2.2	-	17:80453735-80454729	0.0481005	0.0421273	0	0.044355	0	0.0486752	0	0	0.0501289	1	1	0	1	0	1	0	0	1
ENSG00000260368	RP11-521I2.3	-	8:100913247-100914388	0.0838597	0	0.0402321	0	0.182479	0.0424096	0.0865773	0	0	2	0	1	0	5	1	2	0	0
ENSG00000021300	PLEKHB1	pleckstrin homology domain containing B1 [Source:HGNC Symbol;Acc:HGNC:19079]	11:73646178-73662819	0.00975928	0.0170862	0.0374705	0.00899484	0.0297273	0.0246824	0.0201511	0.0355587	0.045751	2	4	8	2	7	5	4	7	9
ENSG00000217026	RPL10P1	ribosomal protein L10 pseudogene 1 [Source:HGNC Symbol;Acc:HGNC:10300]	21:27420380-27421023	0	0	0	0.0685298	0	0	0	0	0	0	0	0	1	0	0	0	0	0
ENSG00000217027	TPT1P4	tumor protein, translationally-controlled 1 pseudogene 4 [Source:HGNC Symbol;Acc:HGNC:49298]	6:144200447-144200965	0.0922158	0	0.0885261	0.0850351	0.0802729	0.0933175	0.0952517	0.192121	0	1	0	1	1	1	1	1	2	0
ENSG00000213332	SLC25A5P6	solute carrier family 25 (mitochondrial carrier; adenine nucleotide translocator), member 5 pseudogene 6 [Source:HGNC Symbol;Acc:HGNC:512]	4:186328716-186329601	0	0	0.0518567	0.0498117	0	0	0.0557965	0	0.056296	0	0	1	1	0	0	1	0	1
ENSG00000261013	CTD-2050B12.1	-	16:56183726-56186306	0	0	0	0	0	0	0	0	0	0	0	0	0	0	0	0	0	0
ENSG00000100399	CHADL	chondroadherin like [Source:HGNC Symbol;Acc:HGNC:25165]	22:41229510-41240934	0	0	0	0	0	0	0	0	0	0	0	0	0	0	0	0	0	0
ENSG00000216378	RP3-344J20.1	-	6:100177209-100178192	0	0	0	0	0	0	0	0	0	0	0	0	0	0	0	0	0	0
ENSG00000100393	EP300	E1A binding protein p300 [Source:HGNC Symbol;Acc:HGNC:3373]	22:41091786-41180079	5.18524	7.48586	7.64966	7.717	8.00149	7.32278	7.45261	6.78518	6.73506	1589	2620	2442	2565	2817	2218	2212	1997	1981
ENSG00000213331	RP11-713C19.2	-	4:187970273-187971284	0	0	0	0	0	0	0	0	0	0	0	0	0	0	0	0	0	0
ENSG00000100395	L3MBTL2	l(3)mbt-like 2 (Drosophila) [Source:HGNC Symbol;Acc:HGNC:18594]	22:41205205-41231271	3.88738	3.17732	3.23967	3.36657	3.30081	3.22627	3.21276	3.43831	3.12384	857	800	744	805	836	703	686	728	661
ENSG00000253148	RGS21	regulator of G-protein signaling 21 [Source:HGNC Symbol;Acc:HGNC:26839]	1:192316992-192367285	0	0	0	0.0492009	0	0	0	0	0	0	0	0	2	0	0	0	0	0
ENSG00000223202	RN7SKP297	RNA, 7SK small nuclear pseudogene 297 [Source:HGNC Symbol;Acc:HGNC:46021]	11:74685224-74685505	0	0	0	0	0	0	0	0	0	0	0	0	0	0	0	0	0	0
ENSG00000232353	RP11-655G22.1	-	3:192029880-192036557	0	0	0	0	0	0	0	0	0.091688	0	0	0	0	0	0	0	0	3
ENSG00000213338	ATF4P1	activating transcription factor 4 pseudogene 1 [Source:HGNC Symbol;Acc:HGNC:789]	X:154622428-154623500	0.0892524	0.039065	0.0428193	0	0	0.0451368	0	0	0.0464849	2	1	1	0	0	1	0	0	1
ENSG00000196550	FAM72A	family with sequence similarity 72 member A [Source:HGNC Symbol;Acc:HGNC:24044]	1:206186179-206204414	0.897751	0.746465	2.728	2.76891	2.65351	0.895223	3.40753	3.0127	2.91367	139	132	440	465	472	137	511	448	433
ENSG00000261019	RP11-111K18.2	-	7:42901272-42902639	0.139976	0.0612817	0	0.0968152	0.182787	0.141649	0.25296	0.218627	0.182304	4	2	0	3	6	4	7	6	5
ENSG00000196557	CACNA1H	calcium channel, voltage-dependent, T type, alpha 1H subunit [Source:HGNC Symbol;Acc:HGNC:1395]	16:1153241-1221771	0.0366392	0.0145807	0.0127888	0.0552784	0.0318939	0.0269586	0.0171962	0.0242756	0.048584	11	5	4	18	11	8	5	7	14
ENSG00000222352	RN7SKP221	RNA, 7SK small nuclear pseudogene 221 [Source:HGNC Symbol;Acc:HGNC:45945]	22:21545344-21545644	0	0	0	0	0	0	0	0	0	0	0	0	0	0	0	0	0	0
ENSG00000282206	RP11-141C7.5	-	3:195635188-195636301	8.80096	12.3297	13.1798	13.9568	14.096	13.8907	13.0852	12.4627	13.5709	25	40	39	43	46	39	36	34	37
ENSG00000197208	SLC22A4	solute carrier family 22 (organic cation/zwitterion transporter), member 4 [Source:HGNC Symbol;Acc:HGNC:10968]	5:132294443-132344206	3.54333	4.51132	3.96014	5.8235	5.21493	4.79724	5.6555	6.13111	6.47382	207	301	241	369	350	277	320	344	363
ENSG00000239468	RN7SL569P	RNA, 7SL, cytoplasmic 569, pseudogene [Source:HGNC Symbol;Acc:HGNC:46585]	7:148890226-148890513	0.166181	0.145544	0	0.613112	0.723579	0.504498	1.54469	1.03848	0.346377	1	1	0	4	5	3	9	6	2
ENSG00000239462	CTD-2021J15.1	-	3:98902424-99018562	0	0.106118	0	0	0	0	0	0.126216	0	0	1	0	0	0	0	0	1	0
ENSG00000151292	CSNK1G3	casein kinase 1, gamma 3 [Source:HGNC Symbol;Acc:HGNC:2456]	5:123512099-123617045	2.36899	2.66288	2.74193	1.89226	2.31286	2.51557	2.82786	2.36662	2.46447	666	855	803	577	747	699	770	639	665
ENSG00000113141	IK	IK cytokine, down-regulator of HLA II [Source:HGNC Symbol;Acc:HGNC:5958]	5:140647058-140662479	23.7397	25.2665	25.51	23.6106	24.3314	24.1812	24.5423	23.9045	23.9674	3099	3767	3469	3343	3649	3120	3103	2997	3003
ENSG00000239464	RN7SL691P	RNA, 7SL, cytoplasmic 691, pseudogene [Source:HGNC Symbol;Acc:HGNC:46707]	4:43598544-43598844	0	0	0	0	0	0	0	0	0	0	0	0	0	0	0	0	0	0
ENSG00000239465	RP11-330L19.2	-	15:64631109-64631914	0	0	0	0	0	0	0	0	0	0	0	0	0	0	0	0	0	0
ENSG00000217686	NUS1P4	NUS1 dehydrodolichyl diphosphate synthase subunit pseudogene 4 [Source:HGNC Symbol;Acc:HGNC:38474]	13:98610292-98610876	0	0	0	0	0	0	0	0	0	0	0	0	0	0	0	0	0	0
ENSG00000217684	RPS3AP24	ribosomal protein S3a pseudogene 24 [Source:HGNC Symbol;Acc:HGNC:36267]	6:140761529-140762262	0.326152	0.0571072	0.0625954	0.120254	0.0567597	0	0.269404	0.0679229	0.271816	5	1	1	2	1	0	4	1	4
ENSG00000217680	RP11-415D17.1	-	6:75465123-75465570	0	0	0	0.0985116	0	0	0	0	0	0	0	0	1	0	0	0	0	0
ENSG00000211947	IGHV3-21	immunoglobulin heavy variable 3-21 [Source:HGNC Symbol;Acc:HGNC:5586]	14:106235064-106235594	0	0	0	0	0	0	0	0	0	0	0	0	0	0	0	0	0	0
ENSG00000026652	AGPAT4	1-acylglycerol-3-phosphate O-acyltransferase 4 [Source:HGNC Symbol;Acc:HGNC:20885]	6:161129979-161274061	2.29444	2.36041	2.38947	2.38329	2.40391	2.49109	2.53595	2.48568	2.72443	766	900	831	863	922	822	820	797	873
ENSG00000205955	HSP90AA5P	heat shock protein 90kDa alpha family class A member 5, pseudogene [Source:HGNC Symbol;Acc:HGNC:32535]	3:184115352-184117898	0.0436897	0.0191226	0.0419416	0.0201338	0	0.0220948	0.0225528	0	0.0227547	2	1	2	1	0	1	1	0	1
ENSG00000177971	IMP3	IMP3, U3 small nucleolar ribonucleoprotein [Source:HGNC Symbol;Acc:HGNC:14497]	15:75639085-75648706	13.4414	10.9354	11.2196	13.1779	11.1656	11.2925	10.1529	12.091	12.1639	1073	997	933	1141	1024	891	785	927	932
ENSG00000211945	IGHV1-18	immunoglobulin heavy variable 1-18 [Source:HGNC Symbol;Acc:HGNC:5549]	14:106184901-106185394	0	0	0	0	0	0	0	0	0	0	0	0	0	0	0	0	0	0
ENSG00000205959	RP11-689P11.2	-	4:8482270-8512610	0.152309	0.155587	0.219323	0.0936248	0.265167	0.192623	0.170364	0.251101	0.119023	12	14	18	8	24	15	13	19	9
ENSG00000185158	LRRC37B	leucine rich repeat containing 37B [Source:HGNC Symbol;Acc:HGNC:29070]	17:32007872-32053504	0.622075	0.495548	0.524568	0.526303	0.477776	0.508439	0.662424	0.548648	0.51087	255	232	224	234	225	206	263	216	201
ENSG00000211683	KB-1572G7.3	-	22:23630618-23638941	0	0.0385618	0.0845777	0	0	0.089111	0.090958	0	0.0458862	0	1	2	0	0	2	2	0	1
ENSG00000211685	IGLC7	immunoglobulin lambda constant 7 [Source:HGNC Symbol;Acc:HGNC:5861]	22:22922594-22923034	0	0	0	0	0	0	0	0.113051	0	0	0	0	0	0	0	0	1	0
ENSG00000211689	TRGC1	T cell receptor gamma constant 1 [Source:HGNC Symbol;Acc:HGNC:12275]	7:38257879-38265678	0.12277	0.0153541	0	0.06468	0.0457971	0.0177406	0	0.0365241	0.0182704	7	1	0	4	3	1	0	2	1
ENSG00000185155	MIXL1	Mix paired-like homeobox [Source:HGNC Symbol;Acc:HGNC:13363]	1:226223618-226227054	0	0	0	0.0139178	0	0.0152734	0	0	0	0	0	0	1	0	1	0	0	0
ENSG00000185156	MFSD6L	major facilitator superfamily domain containing 6-like [Source:HGNC Symbol;Acc:HGNC:26656]	17:8797162-8799349	0	0	0	0	0	0	0	0	0	0	0	0	0	0	0	0	0	0
ENSG00000225193	RPS12P26	ribosomal protein S12 pseudogene 26 [Source:HGNC Symbol;Acc:HGNC:36320]	15:90206572-90206967	0.241838	0.423401	1.16058	0.111447	0.526239	0.122303	0.374513	0.377693	0.251911	2	4	10	1	5	1	3	3	2
ENSG00000229565	AC108056.1	-	4:117834401-117869948	0	0	0	0	0	0	0	0	0	0	0	0	0	0	0	0	0	0
ENSG00000229562	ZFYVE9P1	zinc finger, FYVE domain containing 9 pseudogene 1 [Source:HGNC Symbol;Acc:HGNC:33359]	X:137660519-137662242	0	0	0	0.0511986	0	0	0	0	0	0	0	0	2	0	0	0	0	0
ENSG00000229563	LINC01204	long intergenic non-protein coding RNA 1204 [Source:HGNC Symbol;Acc:HGNC:49635]	X:45505388-45630202	0	0	0	0	0	0	0	0	0	0	0	0	0	0	0	0	0	0
ENSG00000229560	LYARP1	Ly1 antibody reactive pseudogene 1 [Source:HGNC Symbol;Acc:HGNC:50747]	2:82268427-82269927	0	0	0	0	0	0	0	0	0	0	0	0	0	0	0	0	0	0
ENSG00000255043	NAV2-AS5	NAV2 antisense RNA 5 [Source:HGNC Symbol;Acc:HGNC:40740]	11:19502672-19507229	0	0	0	0	0	0	0	0	0	0	0	0	0	0	0	0	0	0
ENSG00000255040	RP11-677N16.1	-	11:14673606-14674555	0.100808	0.0882457	0	0.092912	0.219359	0.0509808	0.20815	0.0524794	0.0525035	2	2	0	2	5	1	4	1	1
ENSG00000229568	SMC4P1	structural maintenance of chromosomes 4 pseudogene 1 [Source:HGNC Symbol;Acc:HGNC:51919]	2:136544712-136545542	0	0	0	0	0	0	0	0	0	0	0	0	0	0	0	0	0	0
ENSG00000229569	RP11-481G8.2	-	10:79000484-79003803	0	0.0415428	0	0	0	0	0.0244974	0	0	0	2	0	0	0	0	1	0	0
ENSG00000213260	YWHAZP5	tyrosine 3-monooxygenase/tryptophan 5-monooxygenase activation protein, zeta pseudogene 5 [Source:HGNC Symbol;Acc:HGNC:30564]	10:105686322-105687051	0.393501	0.516838	0.503696	0.423255	0.456735	0.464482	0.474041	0.477997	0.341632	6	9	8	7	8	7	7	7	5
ENSG00000106635	BCL7B	B-cell CLL/lymphoma 7B [Source:HGNC Symbol;Acc:HGNC:1005]	7:73536356-73558002	3.82736	4.07694	3.40394	3.98631	3.86595	3.45815	3.72447	3.57486	3.88631	748	910	693	845	868	668	705	671	729
ENSG00000106636	YKT6	YKT6 v-SNARE homolog (S. cerevisiae) [Source:HGNC Symbol;Acc:HGNC:16959]	7:44200968-44214294	17.811	15.7484	17.2436	15.6026	15.8136	14.9291	16.2724	15.5343	15.325	3049	3079	3075	2897	3110	2526	2698	2554	2518
ENSG00000261103	RP11-298D21.3	-	16:83710179-83717898	0	0	0	0	0	0	0	0	0	0	0	0	0	0	0	0	0	0
ENSG00000280299	RP11-583F2.7	-	17:64940602-64954177	0	0	0	0.141226	0	0	0	0	0	0	0	0	2	0	0	0	0	0
ENSG00000106631	MYL7	myosin light chain 7 [Source:HGNC Symbol;Acc:HGNC:21719]	7:44138864-44141332	0	0	0	0.0128444	0.0606492	0.0563959	0	0	0.0290328	0	0	0	1	5	4	0	0	2
ENSG00000106633	GCK	glucokinase (hexokinase 4) [Source:HGNC Symbol;Acc:HGNC:4195]	7:44144271-44198170	0.0314456	0.0321246	0.0251579	0.0434905	0.0410595	0.0159054	0.0541113	0.0491131	0.0382264	6	7	5	9	9	3	10	9	7
ENSG00000280295	RP11-358B23.6	-	17:42233832-42235469	0	0	0	0	0	0	0	0	0	0	0	0	0	0	0	0	0	0
ENSG00000213269	AC004386.4	-	X:74376125-74376885	0.0628909	0.0550811	0	0	0	0	0	0.0655131	0	1	1	0	0	0	0	0	1	0
ENSG00000280296	RP11-78J21.6	-	13:52497097-52500195	0	0	0	0	0	0	0	0	0	0	0	0	0	0	0	0	0	0
ENSG00000106638	TBL2	transducin (beta)-like 2 [Source:HGNC Symbol;Acc:HGNC:11586]	7:73568932-73578791	2.86948	2.49637	2.74576	2.69922	2.79627	2.69868	2.6275	2.75815	1.92714	937	931	934	956	1049	871	831	865	604
ENSG00000225196	RP5-1118D24.2	-	1:12220794-12221109	0	0	0	0	0	0	0	0	0	0	0	0	0	0	0	0	0	0
ENSG00000255045	RP11-677M14.2	-	11:124744634-124746337	0	0	0	0	0	0	0	0	0	0	0	0	0	0	0	0	0	0
ENSG00000123584	MAGEA9	MAGE family member A9 [Source:HGNC Symbol;Acc:HGNC:6807]	X:149781930-149787737	5.14674	4.39083	4.35789	5.84016	4.54884	4.43275	5.23211	4.83669	5.71968	195	190	172	240	198	166	192	176	208
ENSG00000260668	RP11-744D14.1	-	16:64260570-64261239	0.518512	0.454046	0.497765	0.398393	0.150477	0	0.535404	0.179984	0.270099	6	6	6	5	2	0	6	2	3
ENSG00000152670	DDX4	DEAD (Asp-Glu-Ala-Asp) box polypeptide 4 [Source:HGNC Symbol;Acc:HGNC:18700]	5:55738017-55817157	0	0	0	0	0	0	0	0	0.00865642	0	0	0	0	0	0	0	0	1
ENSG00000152672	CLEC4F	C-type lectin domain family 4 member F [Source:HGNC Symbol;Acc:HGNC:25357]	2:70808643-70820600	0	0	0	0	0	0	0	0	0	0	0	0	0	0	0	0	0	0
ENSG00000143643	TTC13	tetratricopeptide repeat domain 13 [Source:HGNC Symbol;Acc:HGNC:26204]	1:230906243-230978875	4.47231	4.70695	4.42332	4.48429	4.50892	4.91331	5.01399	5.26025	4.71446	594	714	612	646	688	645	645	671	601
ENSG00000124588	NQO2	NAD(P)H dehydrogenase, quinone 2 [Source:HGNC Symbol;Acc:HGNC:7856]	6:2987987-3028869	9.83638	8.69625	8.7266	9.1711	8.55866	8.62083	7.39178	7.63352	7.81365	2572	2597	2377	2601	2571	2228	1872	1917	1961
ENSG00000143641	GALNT2	polypeptide N-acetylgalactosaminyltransferase 2 [Source:HGNC Symbol;Acc:HGNC:4124]	1:230057990-230282124	24.2381	23.4809	24.666	24.0628	23.167	23.8713	22.7967	22.663	23.0557	5873	6498	6226	6324	6449	5717	5350	5274	5362
ENSG00000124587	PEX6	peroxisomal biogenesis factor 6 [Source:HGNC Symbol;Acc:HGNC:8859]	6:42963870-42979220	13.8558	12.7718	12.6982	14.2078	13.3958	14.7267	14.0401	14.5126	14.7899	1346	1417	1285	1497	1495	1414	1321	1354	1379
ENSG00000167332	OR51E2	olfactory receptor family 51 subfamily E member 2 [Source:HGNC Symbol;Acc:HGNC:15195]	11:4680171-4697854	0.54099	0.560933	0.478331	0.630041	0.594819	0.417713	0.470366	0.474345	0.355986	38	45	35	48	48	29	32	32	24
ENSG00000167333	TRIM68	tripartite motif containing 68 [Source:HGNC Symbol;Acc:HGNC:21161]	11:4598672-4608259	2.73886	2.73849	2.41194	2.86218	3.07093	2.68296	3.01951	2.83964	2.90794	472	539	433	535	608	457	504	470	481
ENSG00000009830	POMT2	protein-O-mannosyltransferase 2 [Source:HGNC Symbol;Acc:HGNC:19743]	14:77274956-77320884	0.835948	0.780276	0.850421	1.04217	0.922139	0.962788	0.789814	0.900507	0.799738	318	339	337	430	403	362	291	329	292
ENSG00000281657	LINC00976	long intergenic non-protein coding RNA 976 [Source:HGNC Symbol;Acc:HGNC:50610]	8:128904773-128966001	0	0	0.0231695	0	0	0.0244235	0.0249297	0	0.0503059	0	0	1	0	0	1	1	0	2
ENSG00000281655	RP11-817J15.3	-	11:102681310-102683913	0	0	0	0	0	0	0	0	0	0	0	0	0	0	0	0	0	0
ENSG00000281652	DUX4L7	double homeobox 4 like 7 [Source:HGNC Symbol;Acc:HGNC:37266]	4:190071232-190072506	0	0	0	0	0	0	0	0	0	0	0	0	0	0	0	0	0	0
ENSG00000220161	FLJ35934	FLJ35934 [Source:EntrezGene;Acc:400579]	17:18411159-18414380	0	0	0	0	0.0445561	0	0	0	0	0	0	0	0	2	0	0	0	0
ENSG00000258056	RP11-644F5.11	-	12:55729104-55730852	2.95296	3.36992	2.57989	3.39553	3.98553	4.69964	4.96724	3.76558	4.07907	89	116	81	111	138	140	145	109	118
ENSG00000244183	RP11-641C17.1	-	3:60732144-60732636	0	0	0	0	0.0845064	0	0	0	0	0	0	0	0	1	0	0	0	0
ENSG00000178927	C17orf62	chromosome 17 open reading frame 62 [Source:HGNC Symbol;Acc:HGNC:28672]	17:82442589-82450829	1.73586	1.6464	1.48775	1.69531	1.8297	1.25561	1.36921	1.26332	1.40435	877	950	783	929	1062	627	670	613	681
ENSG00000178921	PFAS	phosphoribosylformylglycinamidine synthase [Source:HGNC Symbol;Acc:HGNC:8863]	17:8247618-8270491	7.15584	7.83676	8.85272	10.6496	10.566	8.77614	10.2111	10.571	8.39722	1607	2010	2071	2594	2726	1948	2221	2280	1810
ENSG00000178922	HYI	hydroxypyruvate isomerase (putative) [Source:HGNC Symbol;Acc:HGNC:26948]	1:43451003-43453989	0.102161	0.11501	0.105076	0.121105	0.10798	0.199338	0.165758	0.205151	0.159662	14	18	15	18	17	27	22	27	21
ENSG00000178928	TPRX1	tetra-peptide repeat homeobox 1 [Source:HGNC Symbol;Acc:HGNC:32174]	19:47801243-47819051	0	0	0	0	0	0	0	0	0	0	0	0	0	0	0	0	0	0
ENSG00000266341	RP5-890E16.4	-	17:48060383-48060669	0	0	0	0	0	0	0	0	0	0	0	0	0	0	0	0	0	0
ENSG00000266340	RP11-848P1.4	-	17:30978610-30980250	0	0	0	0	0	0	0	0	0	0	0	0	0	0	0	0	0	0
ENSG00000168310	IRF2	interferon regulatory factor 2 [Source:HGNC Symbol;Acc:HGNC:6117]	4:184387713-184474580	4.99172	5.08697	5.30402	4.98482	5.27385	5.02633	5.30072	4.65423	5.05246	421	490	466	456	511	419	433	377	409
ENSG00000168314	MOBP	myelin-associated oligodendrocyte basic protein [Source:HGNC Symbol;Acc:HGNC:7189]	3:39467198-39529479	0.00315491	0.0110525	0.0272672	0.0174583	0.010988	0.00638521	0.0162939	0.0262883	0.023019	1	4	9	6	4	2	5	8	7
ENSG00000262456	RP1-59D14.1	-	17:2384847-2386664	0	0	0	0	0	0	0	0	0	0	0	0	0	0	0	0	0	0
ENSG00000262454	MIR193BHG	MIR193B host gene [Source:HGNC Symbol;Acc:HGNC:51945]	16:14301389-14326744	0.215415	0.0943164	0.120625	0.0662079	0.0625001	0.0908167	0.0370721	0.168222	0.0935101	12	6	7	4	4	5	2	9	5
ENSG00000229492	AC004019.10	-	22:17418697-17419828	0	0	0	0	0	0.0427843	0	0	0.0881242	0	0	0	0	0	1	0	0	2
ENSG00000241073	RP4-714D9.2	-	1:100057990-100084471	0	0	0	0	0	0	0	0	0	0	0	0	0	0	0	0	0	0
ENSG00000268416	CTD-2626G11.2	-	19:20746923-20755250	0	0	0	0.00529938	0	0.00581554	0.00593608	0	0.0119785	0	0	0	1	0	1	1	0	2
ENSG00000114268	PFKFB4	6-phosphofructo-2-kinase/fructose-2,6-biphosphatase 4 [Source:HGNC Symbol;Acc:HGNC:8875]	3:48517684-48562015	6.40351	6.17133	7.14228	7.20351	6.98248	6.75371	6.96389	6.29224	6.73747	1013	1115	1177	1236	1269	1056	1067	956	1023
ENSG00000241074	RN7SL813P	RNA, 7SL, cytoplasmic 813, pseudogene [Source:HGNC Symbol;Acc:HGNC:46829]	2:168451324-168451606	0	0	0	0	0	0	0	0	0	0	0	0	0	0	0	0	0	0
ENSG00000268412	TRMT112P6	tRNA methyltransferase 11-2 homolog (S. cerevisiae) pseudogene 6 [Source:HGNC Symbol;Acc:HGNC:44025]	2:26028208-26028612	0	0	0	2.01719	0	0	1.86035	2.01016	0	0	0	0	17	0	0	14	15	0
ENSG00000200673	RN7SKP174	RNA, 7SK small nuclear pseudogene 174 [Source:HGNC Symbol;Acc:HGNC:45898]	7:144849755-144850084	0	0	0	0	0	0	0	0	0	0	0	0	0	0	0	0	0	0
ENSG00000040487	PQLC2	PQ loop repeat containing 2 [Source:HGNC Symbol;Acc:HGNC:26001]	1:19312326-19329300	5.25476	4.59227	5.17758	5.40232	5.26436	5.69763	5.31279	6.132	5.8053	530	529	544	591	610	568	519	594	562
ENSG00000200674	RN7SKP160	RNA, 7SK small nuclear pseudogene 160 [Source:HGNC Symbol;Acc:HGNC:45884]	1:173791548-173791887	0	0	0	0.129804	0.367724	0.142446	0	0	0	0	0	0	1	3	1	0	0	0
ENSG00000204709	LINC01556	long intergenic non-protein coding RNA 1556 [Source:HGNC Symbol;Acc:HGNC:21195]	6:28943877-28944537	0.616428	0.26985	0.197287	0.378919	0.715487	0.207862	0.318255	0.53493	0	6	3	2	4	8	2	3	5	0
ENSG00000204703	OR2B3	olfactory receptor family 2 subfamily B member 3 [Source:HGNC Symbol;Acc:HGNC:8238]	6:29086307-29087313	0	0	0	0	0	0	0	0	0	0	0	0	0	0	0	0	0	0
ENSG00000204702	OR2J1	olfactory receptor family 2 subfamily J member 1 (gene/pseudogene) [Source:HGNC Symbol;Acc:HGNC:8259]	6:29100609-29101881	0	0	0	0	0	0	0	0	0	0	0	0	0	0	0	0	0	0
ENSG00000204701	OR2J3	olfactory receptor family 2 subfamily J member 3 [Source:HGNC Symbol;Acc:HGNC:8261]	6:29111891-29112826	0	0	0	0	0	0	0	0	0	0	0	0	0	0	0	0	0	0
ENSG00000204700	OR2J2	olfactory receptor family 2 subfamily J member 2 [Source:HGNC Symbol;Acc:HGNC:8260]	6:29173303-29174574	0	0	0	0	0	0	0	0	0	0	0	0	0	0	0	0	0	0
ENSG00000204706	MAMDC2-AS1	MAMDC2 antisense RNA 1 [Source:HGNC Symbol;Acc:HGNC:48719]	9:70033921-70175888	0	0	0	0.00363595	0.0137327	0.0079802	0.0040728	0.00410739	0.0123278	0	0	0	1	4	2	1	1	3
ENSG00000204705	UBTFL5	upstream binding transcription factor, RNA polymerase I-like 5 (pseudogene) [Source:HGNC Symbol;Acc:HGNC:35405]	2:95450310-95451500	0	0	0	0	0	0	0	0	0	0	0	0	0	0	0	0	0	0
ENSG00000204704	OR2W1	olfactory receptor family 2 subfamily W member 1 [Source:HGNC Symbol;Acc:HGNC:8281]	6:29044213-29045240	0	0	0	0	0	0	0	0	0	0	0	0	0	0	0	0	0	0
ENSG00000227973	PIN4P1	protein (peptidylprolyl cis/trans isomerase) NIMA-interacting, 4 pseudogene 1 [Source:HGNC Symbol;Acc:HGNC:44193]	15:43875849-43876244	6.52878	4.76368	6.84767	4.68167	6.10383	5.62691	3.62004	7.17553	4.40882	54	45	59	42	58	46	29	57	35
ENSG00000217929	CICP18	capicua transcriptional repressor pseudogene 18 [Source:HGNC Symbol;Acc:HGNC:48828]	6:142272-145083	0.0340568	0.0447191	0	0	0.029646	0.0861337	0.0527407	0.0531886	0.0354753	2	3	0	0	2	5	3	3	2
ENSG00000153107	ANAPC1	anaphase promoting complex subunit 1 [Source:HGNC Symbol;Acc:HGNC:19988]	2:111766271-111884690	9.79387	12.0416	11.4799	11.4938	11.8307	11.2901	11.5403	12.0464	11.5218	3221	4523	3933	4100	4470	3670	3676	3805	3637
ENSG00000228778	RP11-129J12.1	-	10:99527081-99528261	0	0	0	0	0	0	0	0	0	0	0	0	0	0	0	0	0	0
ENSG00000228779	Z69666.2	-	16:125737-127219	0	0	0	0	0	0	0	0	0	0	0	0	0	0	0	0	0	0
ENSG00000228775	WEE2-AS1	WEE2 antisense RNA 1 [Source:HGNC Symbol;Acc:HGNC:48669]	7:141704338-141738346	0.0751454	0.0292408	0.0160335	0.0307946	0.0799517	0.0506871	0.017243	0.0260841	0.0260961	9	4	2	4	11	6	2	3	3
ENSG00000228776	RP11-319C21.1	-	1:42140635-42141391	0	0	0	0	0	0	0	0	0	0	0	0	0	0	0	0	0	0
ENSG00000228777	RP11-282C5.1	-	6:115633542-115634191	0	0	0	0	0	0	0	0	0	0	0	0	0	0	0	0	0	0
ENSG00000228770	AC007327.6	-	7:36228621-36228884	0	0	0	0	0	0	0	0	0	0	0	0	0	0	0	0	0	0
ENSG00000228771	RP11-552J9.1	-	X:52583989-52586312	0	0	0	0	0	0	0	0	0	0	0	0	0	0	0	0	0	0
ENSG00000228772	RP1-309H15.2	-	6:22589137-22593833	0	0	0	0	0	0	0	0	0	0	0	0	0	0	0	0	0	0
ENSG00000279268	RP11-628M2.1	-	15:65226472-65226697	0	0	0	0	0	0	0	0	0	0	0	0	0	0	0	0	0	0
ENSG00000279269	RP11-573M3.5	-	11:93206990-93207583	0	0	0	0	0	0	0	0	0	0	0	0	0	0	0	0	0	0
ENSG00000222685	RN7SKP119	RNA, 7SK small nuclear pseudogene 119 [Source:HGNC Symbol;Acc:HGNC:45843]	2:47359505-47359777	0	0	0	0	0	0	0	0	0	0	0	0	0	0	0	0	0	0
ENSG00000279260	OR4X1	olfactory receptor family 4 subfamily X member 1 (gene/pseudogene) [Source:HGNC Symbol;Acc:HGNC:14854]	11:48263861-48264778	0	0	0	0	0	0	0	0	0	0	0	0	0	0	0	0	0	0
ENSG00000279261	AL360294.1	-	1:234757621-234760056	0	0.0344144	0	0	0	0	0	0.0204661	0	0	2	0	0	0	0	0	1	0
ENSG00000279262	CTD-3137H5.5	-	19:18448275-18448802	0	0	0	0	0	0	0.0936281	0	0	0	0	0	0	0	0	1	0	0
ENSG00000279263	OR2L8	-	1:247948858-247949796	0	0	0	0	0	0	0.0526471	0	0	0	0	0	0	0	0	1	0	0
ENSG00000279264	RP11-417J1.6	-	5:8614356-8614696	0	0	0	0	0	0	0	0	0	0	0	0	0	0	0	0	0	0
ENSG00000279265	AC000123.3	-	7:127349833-127350293	5.81597	4.27395	4.88522	3.15987	3.52559	5.98927	4.39634	4.10923	5.08564	56	47	49	33	39	57	41	38	47
ENSG00000279266	RP11-371I20.2	-	11:20131730-20135465	0	0	0	0	0	0	0	0	0	0	0	0	0	0	0	0	0	0
ENSG00000279267	RP11-395L14.18	-	2:113605867-113607908	7.59666	5.46078	6.52721	5.25292	4.71444	5.52719	5.73727	4.90697	5.42306	324	266	290	243	231	233	237	201	222
ENSG00000226646	RPL7P37	ribosomal protein L7 pseudogene 37 [Source:HGNC Symbol;Acc:HGNC:36656]	10:35697300-35698037	0.0648509	0.170393	0.0622562	0.0598011	0.11296	0.0656258	0.133972	0.0675548	0.0675857	1	3	1	1	2	1	2	1	1
ENSG00000226647	RP11-336A10.2	-	10:5712174-5744067	0	0	0	0	0	0	0	0	0	0	0	0	0	0	0	0	0	0
ENSG00000226644	RP11-128M1.1	-	20:2207217-2213151	0	0	0	0	0	0	0	0	0	0	0	0	0	0	0	0	0	0
ENSG00000253839	RP11-431D12.1	-	8:136489448-136529876	0	0	0	0	0	0	0	0	0	0	0	0	0	0	0	0	0	0
ENSG00000226642	ACTG1P12	actin gamma 1 pseudogene 12 [Source:HGNC Symbol;Acc:HGNC:44496]	3:12070195-12071360	0	0.107847	0	0	0	0	0	0.0427577	0.0427773	0	3	0	0	0	0	0	1	1
ENSG00000226643	RP11-358H9.1	-	1:222452738-222454705	0	0	0	0	0	0	0	0	0	0	0	0	0	0	0	0	0	0
ENSG00000226640	RP11-21J7.1	-	1:193678894-193727035	0	0	0.114576	0	0	0	0	0	0	0	0	1	0	0	0	0	0	0
ENSG00000226641	RP13-13A3.1	-	X:41322601-41323111	0	0	0	0	0	0	0	0	0	0	0	0	0	0	0	0	0	0
ENSG00000164047	CAMP	cathelicidin antimicrobial peptide [Source:HGNC Symbol;Acc:HGNC:1472]	3:48223347-48225491	0	0	0	0	0	0	0	0	0.133901	0	0	0	0	0	0	0	0	2
ENSG00000167004	PDIA3	protein disulfide isomerase family A member 3 [Source:HGNC Symbol;Acc:HGNC:4606]	15:43746392-43773279	90.8775	86.532	84.1889	81.0574	79.1715	78.8247	84.858	80.4518	81.6782	10470	11386	10104	10129	10479	8976	9469	8902	9032
ENSG00000226648	PLCG1-AS1	PLCG1 antisense RNA 1 [Source:HGNC Symbol;Acc:HGNC:40450]	20:41098329-41138003	0	0.0286708	0.0314262	0	0.0855172	0	0	0	0.0341165	0	1	1	0	3	0	0	0	1
ENSG00000226649	AC019118.4	-	2:3156756-3157797	0	0	0	0	0	0	0	0	0	0	0	0	0	0	0	0	0	0
ENSG00000158022	TRIM63	tripartite motif containing 63, E3 ubiquitin protein ligase [Source:HGNC Symbol;Acc:HGNC:16007]	1:26051304-26068436	0.598072	0.396284	0.4655	0.402368	0.619071	0.294369	0.517355	0.454421	0.77468	37	28	30	27	44	18	31	27	46
ENSG00000158023	WDR66	WD repeat domain 66 [Source:HGNC Symbol;Acc:HGNC:28506]	12:121917862-122003927	0.835384	1.03602	0.83482	0.908688	0.984065	1.0025	0.870675	1.01798	0.873104	317	449	330	374	429	376	320	371	318
ENSG00000183242	WT1-AS	WT1 antisense RNA [Source:HGNC Symbol;Acc:HGNC:18135]	11:32435518-32458769	0.967039	1.09481	0.934233	0.982442	1.0991	1.26506	1.05568	1.27625	1.00753	157	203	158	173	205	203	166	199	157
ENSG00000198723	C19orf45	chromosome 19 open reading frame 45 [Source:HGNC Symbol;Acc:HGNC:24745]	19:7492976-7508450	0.0627333	0.109858	0.0602232	0.0674767	0.0819127	0.0528954	0.0755732	0.0544392	0.0108928	6	12	6	7	9	5	7	5	1
ENSG00000167800	TBX10	T-box 10 [Source:HGNC Symbol;Acc:HGNC:11593]	11:67631303-67639560	0	0	0	0	0	0	0	0	0	0	0	0	0	0	0	0	0	0
ENSG00000198722	UNC13B	unc-13 homolog B (C. elegans) [Source:HGNC Symbol;Acc:HGNC:12566]	9:35161992-35405338	4.04588	4.56217	4.85929	4.91939	5.00388	5.0604	4.61798	4.83098	4.33128	872	1123	1091	1150	1239	1078	964	1000	896
ENSG00000227412	STK33P1	serine/threonine kinase 33 pseudogene 1 [Source:HGNC Symbol;Acc:HGNC:26871]	9:85492579-85494094	0	0	0	0	0	0	0	0	0	0	0	0	0	0	0	0	0	0
ENSG00000183248	PRR36	proline rich 36 [Source:HGNC Symbol;Acc:HGNC:26172]	19:7868719-7874379	0.32203	0.403889	0.300777	0.34505	0.295455	0.3082	0.449306	0.371545	0.444326	37	53	36	43	39	35	50	41	49
ENSG00000183249	NF1P3	neurofibromin 1 pseudogene 3 [Source:HGNC Symbol;Acc:HGNC:7766]	21:14000927-14005279	0	0	0	0	0	0	0	0	0	0	0	0	0	0	0	0	0	0
ENSG00000127774	EMC6	ER membrane protein complex subunit 6 [Source:HGNC Symbol;Acc:HGNC:28430]	17:3668815-3669668	21.8242	17.3016	20.9177	19.8404	19.0261	19.8895	18.4106	19.3062	19.6709	645	584	644	636	646	581	527	548	558
ENSG00000239926	PRDX3P4	peroxiredoxin 3 pseudogene 4 [Source:HGNC Symbol;Acc:HGNC:44643]	3:64174401-64175147	0	0	0	0	0	0	0	0	0	0	0	0	0	0	0	0	0	0
ENSG00000143753	DEGS1	delta(4)-desaturase, sphingolipid 1 [Source:HGNC Symbol;Acc:HGNC:13709]	1:224175756-224193441	17.6295	17.4742	9.73782	16.1635	9.37362	9.09799	18.4044	10.2176	17.9591	1439	1629	828	1431	879	734	1455	801	1407
ENSG00000239923	RN7SL864P	RNA, 7SL, cytoplasmic 864, pseudogene [Source:HGNC Symbol;Acc:HGNC:46880]	20:14223041-14223325	0	0	0	0	0	0	0	0	0	0	0	0	0	0	0	0	0	0
ENSG00000239922	RP11-71N10.1	-	3:147940004-148006755	0	0	0	0	0	0	0	0	0	0	0	0	0	0	0	0	0	0
ENSG00000239921	LINC01471	long intergenic non-protein coding RNA 1471 [Source:HGNC Symbol;Acc:HGNC:51106]	3:127480690-127537780	0	0	0	0	0	0	0	0	0	0	0	0	0	0	0	0	0	0
ENSG00000239920	AC015691.13	-	11:5572322-5624896	0	0	0	0.082492	0	0	0	0	0	0	0	0	1	0	0	0	0	0
ENSG00000233924	RPSAP13	ribosomal protein SA pseudogene 13 [Source:HGNC Symbol;Acc:HGNC:6505]	14:55004813-55005687	0.0546971	0.335381	0.10507	0.151364	0.0952737	0.166052	0.169494	0.0569776	0.171011	1	7	2	3	2	3	3	1	3
ENSG00000233927	RPS28	ribosomal protein S28 [Source:HGNC Symbol;Acc:HGNC:10418]	19:8321158-8323340	18.3959	17.0396	19.0186	21.3233	19.9209	18.1956	18.6809	20.4772	19.33	1520	1608	1637	1911	1891	1486	1495	1625	1533
ENSG00000233926	RP11-154D17.1	-	9:81689713-81776900	0	0	0	0	0	0	0	0	0	0	0	0	0	0	0	0	0	0
ENSG00000233921	RPS15AP40	ribosomal protein S15a pseudogene 40 [Source:HGNC Symbol;Acc:HGNC:36041]	X:36374793-36375183	0	0	0	0	0	0	0	0	0	0	0	0	0	0	0	0	0	0
ENSG00000233920	RP5-1061H20.5	-	1:229223461-229227562	0	0	0	0	0	0	0	0	0	0	0	0	0	0	0	0	0	0
ENSG00000233922	AL133493.2	-	21:45593654-45603056	8.28434	9.09896	9.13484	8.36951	11.3387	10.0708	10.4344	11.4745	9.93413	1305	1637	1499	1430	2052	1568	1592	1736	1502
ENSG00000173838	10-Mar	membrane associated ring-CH-type finger 10 [Source:HGNC Symbol;Acc:HGNC:26655]	17:62701314-62808344	0	0	0	0	0	0	0	0	0	0	0	0	0	0	0	0	0	0
ENSG00000122728	TAF1L	TATA-box binding protein associated factor 1 like [Source:HGNC Symbol;Acc:HGNC:18056]	9:32629454-32635669	0.146344	0.195577	0.13309	0.21304	0.214541	0.303915	0.286291	0.256632	0.33704	19	29	18	30	32	39	36	32	42
ENSG00000122729	ACO1	aconitase 1 [Source:HGNC Symbol;Acc:HGNC:117]	9:32384603-32454769	6.30707	6.73815	7.06034	7.12797	6.93768	6.73106	7.27335	6.92182	7.17525	1240	1513	1446	1520	1567	1308	1385	1307	1354
ENSG00000227418	PCGEM1	PCGEM1, prostate-specific transcript (non-protein coding) [Source:HGNC Symbol;Acc:HGNC:30145]	2:192749845-192776899	0	0	0	0	0	0	0	0	0	0	0	0	0	0	0	0	0	0
ENSG00000245311	ARNTL2-AS1	ARNTL2 antisense RNA 1 [Source:HGNC Symbol;Acc:HGNC:49892]	12:27389789-27446625	0	0	0	0	0	0	0	0	0	0	0	0	0	0	0	0	0	0
ENSG00000245317	CTC-241N9.1	-	5:179859013-179861283	1.41592	1.67223	1.10635	1.3358	1.54775	1.79901	1.66589	1.81712	1.71535	43	58	35	44	54	54	49	53	50
ENSG00000165406	8-Mar	membrane associated ring-CH-type finger 8 [Source:HGNC Symbol;Acc:HGNC:23356]	10:45454585-45594906	2.90005	2.82012	3.11323	3.19504	3.19065	3.31331	2.94831	2.79466	3.20348	913	1014	1021	1091	1154	1031	899	845	968
ENSG00000165409	TSHR	thyroid stimulating hormone receptor [Source:HGNC Symbol;Acc:HGNC:12373]	14:80954989-81146302	0.00576488	0.010098	0.0221424	0.0159532	0	0	0.0238187	0.00600523	0.018024	1	2	4	3	0	0	4	1	3
ENSG00000257998	RP11-361A23.3	-	12:74728038-74728851	0	0	0	0	0	0	0	0	0	0	0	0	0	0	0	0	0	0
ENSG00000257999	RP11-61E11.2	-	12:105102472-105107179	0	0.130785	0.215103	0	0.195049	0	0	0.155555	0.155626	0	2	3	0	3	0	0	2	2
ENSG00000241258	CRCP	CGRP receptor component [Source:HGNC Symbol;Acc:HGNC:17888]	7:66114604-66154568	1.15821	1.16735	1.24525	1.36208	2.666	1.08327	1.24897	1.20594	1.67329	225	259	252	287	595	208	235	225	312
ENSG00000257991	RP11-2H8.3	-	12:71835034-71835396	0	0.115473	0	0	0	0	0	0	0	0	1	0	0	0	0	0	0	0
ENSG00000257997	RP11-100F15.2	-	12:114080381-114113489	0	0	0	0	0	0	0	0	0	0	0	0	0	0	0	0	0	0
ENSG00000257994	RP11-626I20.2	-	12:103505411-103506174	0	0	0	0	0	0	0	0	0	0	0	0	0	0	0	0	0	0
ENSG00000257995	RP11-632B21.1	-	12:90617759-90622822	0	0	0	0	0	0	0	0	0	0	0	0	0	0	0	0	0	0
ENSG00000256691	RP11-476M19.3	-	12:3462718-3463586	0	0	0	0	0	0	0	0	0	0	0	0	0	0	0	0	0	0
ENSG00000255843	AP000593.7	-	11:72302139-72302965	0.0828028	0	0.0794897	0.22914	0.072079	0.0837921	0	0	0.0862946	1	0	1	3	1	1	0	0	1
ENSG00000255847	RP11-167N4.2	-	11:73963657-73970287	0.224121	0.245295	0.188243	0.258291	0.170693	0.0850178	0.144633	0.204177	0.2627	8	10	7	10	7	3	5	7	9
ENSG00000255845	RP11-804A23.1	-	11:60813932-60821739	0	0	0	0	0	0	0	0	0	0	0	0	0	0	0	0	0	0
ENSG00000254719	RP11-351I24.3	-	11:10272052-10272259	17.7241	11.6895	12.816	15.9166	18.0324	16.0689	15.4477	17.7353	19.1854	77	58	58	75	90	69	65	74	80
ENSG00000254718	CTD-2184C24.2	-	14:60240121-60248765	0.0225336	0.0197255	0	0.0207686	0	0.0227914	0.0116319	0.0117307	0.0117361	2	2	0	2	0	2	1	1	1
ENSG00000281527	AC087350.1	-	8:116849884-116851073	0	0.436632	0	0	0	0	0	0	0	0	1	0	0	0	0	0	0	0
ENSG00000254710	CTD-2216M2.1	-	11:123188802-123228277	0	0	0	0	0	0	0	0	0	0	0	0	0	0	0	0	0	0
ENSG00000254713	HNRNPA1P72	heterogeneous nuclear ribonucleoprotein A1 pseudogene 72 [Source:HGNC Symbol;Acc:HGNC:48802]	11:84545131-84546846	0	0	0	0	0	0	0	0	0	0	0	0	0	0	0	0	0	0
ENSG00000254712	RP11-560B16.5	-	11:6843664-6844666	0	0	0	0	0	0	0	0	0.0497291	0	0	0	0	0	0	0	0	1
ENSG00000254715	OR7E154P	olfactory receptor family 7 subfamily E member 154 pseudogene [Source:HGNC Symbol;Acc:HGNC:31309]	8:7705182-7706113	0	0	0	0	0	0	0	0	0	0	0	0	0	0	0	0	0	0
ENSG00000254714	RP11-163O19.1	-	11:49850629-49862528	0	0	0	0	0	0	0	0	0	0	0	0	0	0	0	0	0	0
ENSG00000254717	GLYATL1P2	glycine-N-acyltransferase like 1 pseudogene 2 [Source:HGNC Symbol;Acc:HGNC:37863]	11:58878302-58893460	0	0	0	0	0	0	0	0	0	0	0	0	0	0	0	0	0	0
ENSG00000240849	TMEM189	transmembrane protein 189 [Source:HGNC Symbol;Acc:HGNC:16735]	20:50118254-50153734	3.35665	3.23121	1.90727	1.37742	1.26328	2.49306	1.37824	1.13536	3.31524	865	951	512	385	374	635	344	281	820
ENSG00000278134	RP11-12A20.4	-	9:67722083-67722683	0	0	0	0	0	0	0	0	0	0	0	0	0	0	0	0	0	0
ENSG00000278133	RP11-196G11.5	-	16:31122235-31124064	6.40106	6.3337	6.04482	6.38136	6.84009	7.42393	5.37312	7.04413	6.72327	123	139	121	133	151	141	100	130	124
ENSG00000158683	PKD1L1	polycystic kidney disease 1 like 1 [Source:HGNC Symbol;Acc:HGNC:18053]	7:47774652-47948491	0	0	0	0	0	0	0	0	0	0	0	0	0	0	0	0	0	0
ENSG00000278131	AC116050.1	-	2:91589494-91621421	0	0	0	0	0	0	0	0	0	0	0	0	0	0	0	0	0	0
ENSG00000278130	RP11-424E7.6	-	9:138177426-138179774	0	0	0	0	0	0	0	0	0	0	0	0	0	0	0	0	0	0
ENSG00000240842	RP11-62G11.2	-	3:69564106-69571122	0	0	0	0	0	0	0	0	0	0	0	0	0	0	0	0	0	0
ENSG00000225222	CHCHD4P5	coiled-coil-helix-coiled-coil-helix domain containing 4 pseudogene 5 [Source:HGNC Symbol;Acc:HGNC:44493]	1:246178778-246179204	0	0	0	0	0	0	0	0	0	0	0	0	0	0	0	0	0	0
ENSG00000278139	PIK3R3	phosphoinositide-3-kinase regulatory subunit 3 [Source:EntrezGene;Acc:8503]	1:46043661-46176488	0	0	0	0	0	0	0	0	0	0	0	0	0	0	0	0	0	0
ENSG00000240847	RN7SL497P	RNA, 7SL, cytoplasmic 497, pseudogene [Source:HGNC Symbol;Acc:HGNC:46513]	15:41191965-41192265	0	0	0	0	0	0	0	0	0	0	0	0	0	0	0	0	0	0
ENSG00000008056	SYN1	synapsin I [Source:HGNC Symbol;Acc:HGNC:11494]	X:47571898-47619853	0.41516	0.461751	0.441619	0.372416	0.332071	0.283804	0.428643	0.315443	0.175351	37	47	41	36	34	25	37	27	15
ENSG00000130518	KIAA1683	KIAA1683 [Source:HGNC Symbol;Acc:HGNC:29350]	19:18257097-18274509	0.0147674	0.00430976	0.0047263	0.00226883	0.00428565	0.0149414	0.00762425	0.010252	0.020516	6	2	2	1	2	6	3	4	8
ENSG00000159374	M1AP	meiosis 1 associated protein [Source:HGNC Symbol;Acc:HGNC:25183]	2:74557883-74648338	0.0836296	0.0823781	0.0501784	0.0289177	0.0727984	0.0317239	0.0863397	0.0870727	0.0871347	8	9	5	3	8	3	8	8	8
ENSG00000159377	PSMB4	proteasome subunit beta 4 [Source:HGNC Symbol;Acc:HGNC:9541]	1:151399534-151401944	25.8522	21.4352	21.7591	23.7281	21.8556	21.6492	21.9591	22.4574	23.1893	3790	3589	3323	3773	3681	3137	3118	3162	3263
ENSG00000215864	NBPF7	neuroblastoma breakpoint family member 7 [Source:HGNC Symbol;Acc:HGNC:31989]	1:119834870-119844514	0	0	0	0	0	0	0	0	0	0	0	0	0	0	0	0	0	0
ENSG00000130511	SSBP4	single stranded DNA binding protein 4 [Source:HGNC Symbol;Acc:HGNC:15676]	19:18418864-18434562	21.218	19.4967	18.8247	18.4233	17.846	19.2549	18.5157	18.1313	19.011	2164	2271	2000	2038	2091	1941	1829	1776	1861
ENSG00000130513	GDF15	growth differentiation factor 15 [Source:HGNC Symbol;Acc:HGNC:30142]	19:18374731-18389176	13.5367	15.4349	12.1825	17.0967	18.8092	16.0531	18.0288	17.4305	16.7045	976	1271	915	1337	1558	1144	1259	1207	1156
ENSG00000130517	PGPEP1	pyroglutamyl-peptidase I [Source:HGNC Symbol;Acc:HGNC:13568]	19:18340587-18369950	7.35598	7.02119	6.90042	7.49627	6.4238	6.92115	7.21552	6.5614	6.59882	1842	2008	1800	2036	1848	1713	1750	1578	1586
ENSG00000234998	RP11-439A17.10	-	1:121087528-121116676	0	0	0	0	0	0.105516	0	0	0	0	0	0	0	0	1	0	0	0
ENSG00000164758	MED30	mediator complex subunit 30 [Source:HGNC Symbol;Acc:HGNC:23032]	8:117520713-117540262	9.27619	8.2945	7.67586	7.82606	8.00581	8.26927	6.9543	8.85873	8.31029	471	481	406	431	467	415	342	432	405
ENSG00000164756	SLC30A8	solute carrier family 30 (zinc transporter), member 8 [Source:HGNC Symbol;Acc:HGNC:20303]	8:116950273-117176714	0.00960656	0.00840941	0.0184398	0.0177125	0.0167206	0.0242961	0	0.0300012	0.0250167	2	2	4	4	4	5	0	6	5
ENSG00000164754	RAD21	RAD21 cohesin complex component [Source:HGNC Symbol;Acc:HGNC:9811]	8:116845935-116874866	28.7073	26.7049	28.6894	26.1555	26.0141	26.9084	27.1056	26.3742	26.718	5942	6313	6186	5872	6186	5505	5434	5243	5308
ENSG00000164751	PEX2	peroxisomal biogenesis factor 2 [Source:HGNC Symbol;Acc:HGNC:9717]	8:76980258-77001044	2.89887	3.15959	4.04055	3.71959	2.52329	3.24222	3.30302	4.03581	3.93598	531	661	771	739	531	587	586	710	692
ENSG00000058085	LAMC2	laminin subunit gamma 2 [Source:HGNC Symbol;Acc:HGNC:6493]	1:183186238-183244900	0	0.0113688	0	0	0.0056498	0.0197037	0	0.00676098	0	0	2	0	0	1	3	0	1	0
ENSG00000159082	SYNJ1	synaptojanin 1 [Source:HGNC Symbol;Acc:HGNC:11503]	21:32628759-32728048	1.92357	2.17178	2.13238	2.19076	2.31195	2.20524	2.18279	2.31288	2.16542	646	833	746	798	892	732	710	746	698
ENSG00000155506	LARP1	La ribonucleoprotein domain family member 1 [Source:HGNC Symbol;Acc:HGNC:29531]	5:154712902-154817607	45.4384	49.7785	51.2013	53.3038	53.5606	52.9889	52.7875	53.2295	49.9714	10096	12632	11851	12846	13672	11637	11360	11359	10657
ENSG00000159086	PAXBP1	PAX3 and PAX7 binding protein 1 [Source:HGNC Symbol;Acc:HGNC:13579]	21:32733899-32771858	10.0183	11.6116	11.4529	10.9163	10.6174	11.7614	12.5716	11.7452	12.4392	2326	3079	2770	2749	2832	2699	2827	2619	2772
ENSG00000011478	QPCTL	glutaminyl-peptide cyclotransferase-like [Source:HGNC Symbol;Acc:HGNC:25952]	19:45692483-45703989	8.5187	7.47209	7.63824	5.83798	6.48979	6.94413	6.56905	6.83019	6.51808	561	562	524	417	491	452	419	432	412
ENSG00000230769	RP3-408N23.4	-	22:40788777-40789267	0.0974745	0.683045	1.40408	1.43842	1.27318	0.493296	0.805368	0.406154	0	1	8	15	16	15	5	8	4	0
ENSG00000010704	HFE	hemochromatosis [Source:HGNC Symbol;Acc:HGNC:4886]	6:26087281-26098343	0.0591597	0.0517983	0.158204	0.0467507	0.0514941	0.0513045	0.0785342	0.145197	0.0660393	14	14	39	12	14	12	18	33	15
ENSG00000196616	ADH1B	alcohol dehydrogenase 1B (class I), beta polypeptide [Source:HGNC Symbol;Acc:HGNC:250]	4:99304964-99321401	0.00293008	0.00769867	0	0.0162142	0.00510374	0.00593018	0.0060531	0.0183104	0	1	3	0	6	2	2	2	6	0
ENSG00000125046	SSUH2	ssu-2 homolog (C. elegans) [Source:HGNC Symbol;Acc:HGNC:24809]	3:8619400-8745040	0	0	0.0119668	0	0	0	0	0.00432698	0	0	0	3	0	0	0	0	1	0
ENSG00000196611	MMP1	matrix metallopeptidase 1 [Source:HGNC Symbol;Acc:HGNC:7155]	11:102789920-102798160	0.0486131	0.08511	0.046668	0	0.0846131	0.0245847	0.0752827	0.075922	0.0759568	2	4	2	0	4	1	3	3	3
ENSG00000081913	PHLPP1	PH domain and leucine rich repeat protein phosphatase 1 [Source:HGNC Symbol;Acc:HGNC:20610]	18:62715450-62980433	2.8716	3.06551	3.17499	2.97791	3.14447	2.87592	3.08985	3.07061	3.23904	593	723	683	667	746	587	618	609	642
ENSG00000238837	RP11-646E18.2	-	3:182644214-182655880	0	0	0	0	0	0	0	0	0	0	0	0	0	0	0	0	0	0
ENSG00000120498	TEX11	testis expressed 11 [Source:HGNC Symbol;Acc:HGNC:11733]	X:70528940-70908731	0.114658	0.156167	0.14676	0.223179	0.15525	0.180453	0.263082	0.132651	0.265478	9	14	12	19	14	14	20	10	20
ENSG00000181029	TRAPPC5	trafficking protein particle complex 5 [Source:HGNC Symbol;Acc:HGNC:23067]	19:7680843-7687703	0.635036	1.19629	0.49261	1.21828	1.44611	0.454289	1.47026	0.614456	0.541324	99	213	80	206	259	70	222	92	81
ENSG00000235803	MTCO2P23	MT-CO2 pseudogene 23 [Source:HGNC Symbol;Acc:HGNC:52152]	10:69590583-69591262	0	0	0	0	0	0	0	0	0	0	0	0	0	0	0	0	0	0
ENSG00000005471	ABCB4	ATP binding cassette subfamily B member 4 [Source:HGNC Symbol;Acc:HGNC:45]	7:87401697-87480435	0.0691508	0.112448	0.0948336	0.0819738	0.0988864	0.114941	0.107098	0.108002	0.128656	14	26	20	18	23	23	21	21	25
ENSG00000256713	PGA5	pepsinogen 5, group I (pepsinogen A) [Source:HGNC Symbol;Acc:HGNC:8887]	11:61241042-61251448	0	0.00959851	0	0	0	0	0	0	0	0	1	0	0	0	0	0	0	0
ENSG00000256712	RP11-785H5.2	-	12:11166090-11171353	0	0.435498	0.119338	0.114632	0.216531	0.251594	0.642022	0.129495	0	0	4	1	1	2	2	5	1	0
ENSG00000256717	AP000797.3	-	11:115659658-115843146	0	0	0	0	0	0	0	0	0	0	0	0	0	0	0	0	0	0
ENSG00000256714	RP11-73M14.1	-	12:22395088-22398075	0	0	0	0	0	0	0	0	0	0	0	0	0	0	0	0	0	0
ENSG00000037280	FLT4	fms-related tyrosine kinase 4 [Source:HGNC Symbol;Acc:HGNC:3767]	5:180601506-180649624	0.189302	0.211597	0.189458	0.196815	0.185814	0.211903	0.212086	0.222267	0.209819	47	60	49	53	53	52	51	53	50
ENSG00000254822	RP11-375D13.3	-	11:41876634-41877078	0	0	0	0	0	0	0	0	0	0	0	0	0	0	0	0	0	0
ENSG00000160124	CCDC58	coiled-coil domain containing 58 [Source:HGNC Symbol;Acc:HGNC:31136]	3:122359591-122383231	11.3341	9.71918	9.32382	9.24234	8.9022	9.51133	9.40039	9.25268	10.3468	727	712	623	643	656	603	584	570	637
ENSG00000243004	AC005062.2	-	7:19918981-20140453	0.120493	0.12895	0.12852	0.0864027	0.104888	0.0948187	0.11058	0.083636	0.0976506	9	11	10	7	9	7	8	6	7
ENSG00000243007	RPL12P35	ribosomal protein L12 pseudogene 35 [Source:HGNC Symbol;Acc:HGNC:35969]	15:72379215-72379710	0	0	0	0	0	0	0	0.100515	0	0	0	0	0	0	0	0	1	0
ENSG00000235500	SNX19P2	sorting nexin 19 pseudogene 2 [Source:HGNC Symbol;Acc:HGNC:38115]	13:18892260-18895230	0.0161091	0	0.0154645	0.0148547	0.0140228	0	0	0	0.0167884	1	0	1	1	1	0	0	0	1
ENSG00000243008	RP11-556N21.1	-	13:24566873-24597676	0.0839929	0	0.0537637	0.0258089	0.0487512	0	0	0	0	3	0	2	1	2	0	0	0	0
ENSG00000203914	HSP90B3P	heat shock protein 90kDa beta family member 3, pseudogene [Source:HGNC Symbol;Acc:HGNC:12100]	1:91642516-91644082	0.0611154	0.0534993	0.0293204	0.0563283	0.0532001	0.0309073	0.031548	0.0318159	0.0318304	2	2	1	2	2	1	1	1	1
ENSG00000203910	C1orf146	chromosome 1 open reading frame 146 [Source:HGNC Symbol;Acc:HGNC:24032]	1:92217940-92245813	0	0	0	0	0	0	0	0	0	0	0	0	0	0	0	0	0	0
ENSG00000203573	Metazoa_SRP	Metazoan signal recognition particle RNA [Source:RFAM;Acc:RF00017]	15:40585454-40585751	0	0	0.154178	0	0	0	0	0	0	0	0	1	0	0	0	0	0	0
ENSG00000231383	FGF12-AS1	FGF12 antisense RNA 1 [Source:HGNC Symbol;Acc:HGNC:40234]	3:192238037-192283097	0	0	0	0	0	0	0	0	0	0	0	0	0	0	0	0	0	0
ENSG00000277371	Metazoa_SRP	Metazoan signal recognition particle RNA [Source:RFAM;Acc:RF00017]	10:125869295-125869576	0	0	0	0	0	0	0	0	0	0	0	0	0	0	0	0	0	0
ENSG00000231381	RNF2P1	ring finger protein 2 pseudogene 1 [Source:HGNC Symbol;Acc:HGNC:33987]	9:6668999-6670008	0	0.0415017	0.0454902	0	0	0.0479523	0	0	0	0	1	1	0	0	1	0	0	0
ENSG00000277373	RP11-462D18.4	-	20:17565501-17565851	0	0	0	0	0	0.275965	0	0.142038	0.284207	0	0	0	0	0	2	0	1	2
ENSG00000175294	CATSPER1	cation channel, sperm associated 1 [Source:HGNC Symbol;Acc:HGNC:17116]	11:66016752-66026517	0	0.0833196	0.0456711	0.029237	0.110439	0	0.0163748	0.0165139	0.0165215	0	6	3	2	8	0	1	1	1
ENSG00000231386	AC007395.4	-	2:70810798-70811474	0	0	0	0.0651894	0	0	0	0	0	0	0	0	1	0	0	0	0	0
ENSG00000231384	AC007919.19	-	3:172680714-172681224	0	0	0	0	0	0	0	0	0	0	0	0	0	0	0	0	0	0
ENSG00000274933	TBC1D3I	TBC1 domain family member 3I [Source:HGNC Symbol;Acc:HGNC:32709]	17:36253456-36264553	0	0	0	0	0	0	0	0	0	0	0	0	0	0	0	0	0	0
ENSG00000271650	AL031601.4	-	10:42209990-42210383	0	0	0	0	0	0	0	0	0	0	0	0	0	0	0	0	0	0
ENSG00000231389	HLA-DPA1	major histocompatibility complex, class II, DP alpha 1 [Source:HGNC Symbol;Acc:HGNC:4938]	6:33064569-33080775	0	0	0.00977418	0.00938405	0.00886291	0	0.0157673	0.0212015	0	0	0	2	2	2	0	3	4	0
ENSG00000236871	LINC00106	long intergenic non-protein coding RNA 106 [Source:HGNC Symbol;Acc:HGNC:31843]	X:1396427-1399402	0.404385	0.354026	0.621112	0.82019	0.563204	0.818271	0.501037	0.926283	0.75837	5	5	8	11	8	10	6	11	9
ENSG00000274937	CTD-2311M21.4	-	15:74374678-74375511	0	0.10052	0	0	0	0	0	0	0	0	2	0	0	0	0	0	0	0
ENSG00000176928	GCNT4	glucosaminyl (N-acetyl) transferase 4, core 2 [Source:HGNC Symbol;Acc:HGNC:17973]	5:75025346-75030899	0	0	0	0	0	0	0	0	0	0	0	0	0	0	0	0	0	0
ENSG00000174429	ABRA	actin binding Rho activating protein [Source:HGNC Symbol;Acc:HGNC:30655]	8:106759483-106770245	0	0	0	0	0	0	0	0	0	0	0	0	0	0	0	0	0	0
ENSG00000176923	OR7A15P	olfactory receptor family 7 subfamily A member 15 pseudogene [Source:HGNC Symbol;Acc:HGNC:8361]	19:14927058-14928024	0	0	0	0	0	0	0	0	0	0	0	0	0	0	0	0	0	0
ENSG00000176922	OR51S1	olfactory receptor family 51 subfamily S member 1 [Source:HGNC Symbol;Acc:HGNC:15204]	11:4848237-4849208	0	0	0	0	0	0	0	0	0	0	0	0	0	0	0	0	0	0
ENSG00000176920	FUT2	fucosyltransferase 2 [Source:HGNC Symbol;Acc:HGNC:4013]	19:48695971-48705950	0	0	0	0	0	0	0	0	0	0	0	0	0	0	0	0	0	0
ENSG00000176927	EFCAB5	EF-hand calcium binding domain 5 [Source:HGNC Symbol;Acc:HGNC:24801]	17:29929200-30108452	0.00490268	0.0257674	0.00941774	0.00452092	0.00426774	0	0.0202564	0.0204284	0.0102189	1	6	2	1	1	0	4	4	2
ENSG00000232739	RP11-25G10.2	-	10:15237492-15241767	0	0	0	0	0	0	0	0	0	0	0	0	0	0	0	0	0	0
ENSG00000176925	OR51F2	olfactory receptor family 51 subfamily F member 2 [Source:HGNC Symbol;Acc:HGNC:15197]	11:4821386-4822414	0	0	0	0	0	0	0	0	0	0	0	0	0	0	0	0	0	0
ENSG00000244196	PPIAP15	peptidylprolyl isomerase A (cyclophilin A) pseudogene 15 [Source:HGNC Symbol;Acc:HGNC:9268]	3:109471329-109471812	0	0	0	0	0	0	0	0	0	0	0	0	0	0	0	0	0	0
ENSG00000198169	ZNF251	zinc finger protein 251 [Source:HGNC Symbol;Acc:HGNC:13045]	8:144720907-144756417	1.73684	2.1233	2.35938	2.39442	2.04665	2.41205	2.20771	2.49083	2.4668	212	296	300	317	287	291	261	292	289
ENSG00000198168	SVIP	small VCP/p97-interacting protein [Source:HGNC Symbol;Acc:HGNC:25238]	11:22813799-22830299	8.54742	7.81835	7.49389	6.81001	7.14747	7.61994	7.52372	7.95323	8.4437	1119	1169	1022	967	1075	986	954	1000	1061
ENSG00000198162	MAN1A2	mannosidase, alpha, class 1A, member 2 [Source:HGNC Symbol;Acc:HGNC:6822]	1:117367449-117528872	10.9374	13.3687	13.6456	11.3818	11.8394	13.3769	12.9288	12.5077	12.0027	2533	3536	3292	2859	3150	3062	2900	2782	2668
ENSG00000198160	MIER1	mesoderm induction early response 1, transcriptional regulator [Source:HGNC Symbol;Acc:HGNC:29657]	1:66924895-66988619	3.67962	3.47045	3.62608	3.26017	3.31452	3.59306	3.66669	3.45926	3.90048	1205	1298	1237	1158	1247	1163	1163	1088	1226
ENSG00000171049	FPR2	formyl peptide receptor 2 [Source:HGNC Symbol;Acc:HGNC:3827]	19:51752026-51770526	0	0	0.00538566	0.00517327	0.0146555	0	0.00579483	0	0	0	0	1	1	3	0	1	0	0
ENSG00000175749	EIF3KP1	eukaryotic translation initiation factor 3 subunit K pseudogene 1 [Source:HGNC Symbol;Acc:HGNC:44016]	5:103032376-103033031	0	0	0	0	0	0	0	0	0	0	0	0	0	0	0	0	0	0
ENSG00000231655	AC011742.3	-	2:26140263-26141264	0	0	0	0	0	0	0	0	0	0	0	0	0	0	0	0	0	0
ENSG00000231654	RPS6KA2-AS1	RPS6KA2 antisense RNA 1 [Source:HGNC Symbol;Acc:HGNC:40511]	6:166903698-166904835	0	0	0	0.0703879	0	0	0	0	0	0	0	0	1	0	0	0	0	0
ENSG00000175741	RWDD4P2	RWD domain containing 4 pseudogene 2 [Source:HGNC Symbol;Acc:HGNC:23754]	7:39854494-39855056	12.8411	11.2434	14.0412	12.2311	11.7696	13.5941	13.4337	16.9121	14.8849	151	151	172	156	159	158	153	191	168
ENSG00000171045	TSNARE1	t-SNARE domain containing 1 [Source:HGNC Symbol;Acc:HGNC:26437]	8:142212080-142403240	0.991422	1.25217	1.26335	1.24571	1.199	0.94093	1.17761	0.813035	1.26145	113	163	150	154	157	106	130	89	138
ENSG00000231650	RFESDP1	Rieske (Fe-S) domain containing pseudogene 1 [Source:HGNC Symbol;Acc:HGNC:39420]	13:22850101-22850561	1.03859	0.909346	0.598182	1.14899	0.723247	1.36597	0.857778	0.540731	1.73124	10	10	6	12	8	13	8	5	16
ENSG00000231653	AC010731.3	-	2:206640073-206641282	0	0	0	0	0	0	0	0	0	0	0	0	0	0	0	0	0	0
ENSG00000175745	NR2F1	nuclear receptor subfamily 2 group F member 1 [Source:HGNC Symbol;Acc:HGNC:7975]	5:93583337-93594615	0.0437157	0	0.0349744	0.0470211	0.0253672	0.00737054	0	0.0606899	0	6	0	5	7	4	1	0	8	0
ENSG00000179676	LINC00305	long intergenic non-protein coding RNA 305 [Source:HGNC Symbol;Acc:HGNC:28597]	18:64080009-64149030	0	0	0	0	0	0	0	0	0	0	0	0	0	0	0	0	0	0
ENSG00000179674	ARL14	ADP ribosylation factor like GTPase 14 [Source:HGNC Symbol;Acc:HGNC:22974]	3:160677159-160678452	0	0	0	0	0	0	0	0	0	0	0	0	0	0	0	0	0	0
ENSG00000262648	PHBP15	prohibitin pseudogene 15 [Source:HGNC Symbol;Acc:HGNC:39294]	7:74741457-74742121	0	0	0	0	0	0	0	0	0	0	0	0	0	0	0	0	0	0
ENSG00000147316	MCPH1	microcephalin 1 [Source:HGNC Symbol;Acc:HGNC:6954]	8:6406592-6648504	2.99478	3.00995	3.08743	2.80322	2.78423	3.40691	3.04848	3.20603	3.4644	852	978	915	865	910	958	840	876	946
ENSG00000230381	RP4-655J12.5	-	1:116429049-116433368	0	0	0	0	0	0	0	0	0	0	0	0	0	0	0	0	0	0
ENSG00000230383	AC009245.3	-	7:137721985-137722846	78.4818	68.6684	70.4338	69.5414	69.8608	71.6484	73.518	77.263	74.0711	1413	1412	1321	1358	1445	1275	1282	1336	1280
ENSG00000230384	RPSAP25	ribosomal protein SA pseudogene 25 [Source:HGNC Symbol;Acc:HGNC:36405]	2:176242111-176242993	0	0	0	0	0	0	0.055986	0	0	0	0	0	0	0	0	1	0	0
ENSG00000230385	AC012507.4	-	2:230908852-230910102	0.159613	0.349306	0.0765751	0.367849	0.277813	0.40368	0.0823928	0.249277	0.166261	2	5	1	5	4	5	1	3	2
ENSG00000230386	RP13-157F18.2	-	7:65617077-65619214	0	0	0	0	0	0	0	0	0	0	0	0	0	0	0	0	0	0
ENSG00000230387	RP4-737E23.2	-	20:23187961-23190307	0	0.0411755	0.0150442	0	0.0272968	0	0	0	0.0489963	0	3	1	0	2	0	0	0	3
ENSG00000248783	RP11-308B16.2	-	5:12553890-12574637	1.54439	1.35226	3.70648	2.13595	3.47291	1.30219	2.79059	2.81415	2.6819	12	12	30	18	31	10	21	21	20
ENSG00000248781	PSMC1P4	proteasome (prosome, macropain) 26S subunit, ATPase, 1 pseudogene 4 [Source:HGNC Symbol;Acc:HGNC:39779]	5:56275304-56276630	0.0360663	0	0.0346233	0.0332579	0.0313954	0.0364972	0.0372537	0	0.0375873	1	0	1	1	1	1	1	0	1
ENSG00000248780	ARL4AP2	ADP ribosylation factor like GTPase 4A pseudogene 2 [Source:HGNC Symbol;Acc:HGNC:32379]	4:40786110-40786710	0	0.0697449	0	0	0	0	0	0	0	0	1	0	0	0	0	0	0	0
ENSG00000248787	RP11-666A20.4	-	3:125908005-125910272	0	0	0	0	0	0	0	0	0	0	0	0	0	0	0	0	0	0
ENSG00000248785	HIGD1AP14	HIG1 hypoxia inducible domain family member 1A pseudogene 14 [Source:HGNC Symbol;Acc:HGNC:43009]	4:109673843-109674124	0	0	0	0	0.147736	0	0.175304	0	0	0	0	0	0	1	0	1	0	0
ENSG00000167476	JSRP1	junctional sarcoplasmic reticulum protein 1 [Source:HGNC Symbol;Acc:HGNC:24963]	19:2252252-2269759	0.0222605	0	0	0.0616015	0.0193775	0	0.0229933	0.0231886	0	1	0	0	3	1	0	1	1	0
ENSG00000248789	CTD-2203A3.1	-	5:52008031-52080987	0	0	0	0	0	0	0	0	0	0	0	0	0	0	0	0	0	0
ENSG00000206113	CFAP99	Cilia- and flagella-associated protein 99 [Source:UniProtKB/Swiss-Prot;Acc:D6REC4]	4:2418974-2462942	0.0594203	0.0455257	0.0570428	0.0273932	0.00646318	0.0601153	0.0536844	0.0618668	0.0154757	8	7	8	4	1	8	7	8	2
ENSG00000111897	SERINC1	serine incorporator 1 [Source:HGNC Symbol;Acc:HGNC:13464]	6:122443354-122471822	31.6082	31.4038	31.9102	30.957	28.7353	31.7631	34.4783	30.9879	32.9315	2071	2350	2178	2200	2163	2057	2188	1950	2071
ENSG00000244158	RP1-93H18.6	-	6:116460739-116463692	0	0	0	0	0	0.0913808	0.0932748	0	0	0	0	0	0	0	1	1	0	0
ENSG00000189238	LINC00943	long intergenic non-protein coding RNA 943 [Source:HGNC Symbol;Acc:HGNC:48639]	12:126726270-126746252	0	0	0	0	0	0	0	0	0	0	0	0	0	0	0	0	0	0
ENSG00000276428	AE000660.21	-	14:22066016-22066373	0	0	0	0	0	0	0	0	0	0	0	0	0	0	0	0	0	0
ENSG00000276422	RP11-144A16.8	-	9:60943311-60964185	0	0	0	0	0	0	0	0	0	0	0	0	0	0	0	0	0	0
ENSG00000253879	RP11-379I19.3	-	8:59601378-59613775	0	0	0	0	0	0	0	0	0	0	0	0	0	0	0	0	0	0
ENSG00000253878	RP11-347C18.3	-	8:94950037-94951396	0.0855834	0.337169	0.492872	0.394476	0.335191	0.129844	0.353383	0.267276	0.534933	2	9	12	10	9	3	8	6	12
ENSG00000253871	RP11-756K15.2	-	8:57343787-57364857	0	0	0	0	0	0	0	0	0	0	0	0	0	0	0	0	0	0
ENSG00000253870	IGKV1-32	immunoglobulin kappa variable 1-32 (pseudogene) [Source:HGNC Symbol;Acc:HGNC:5736]	2:89253571-89254015	0	0	0	0	0	0	0	0	0	0	0	0	0	0	0	0	0	0
ENSG00000253873	PCDHGA11	protocadherin gamma subfamily A, 11 [Source:HGNC Symbol;Acc:HGNC:8698]	5:141421047-141512979	0.00460414	0.0120972	0.0132642	0	0.0280629	0	0	0	0.0143949	1	3	3	0	7	0	0	0	3
ENSG00000219500	RP11-15J23.1	-	6:86432244-86432669	0	0	0	0	0	0	0	0	0	0	0	0	0	0	0	0	0	0
ENSG00000253875	RP11-16P20.3	-	8:27733338-27756426	0	0	0	0	0	0	0	0	0	0	0	0	0	0	0	0	0	0
ENSG00000253874	IGLVIV-66-1	immunoglobulin lambda variable (IV)-66-1 (pseudogene) [Source:HGNC Symbol;Acc:HGNC:15692]	22:22058433-22058892	0	0	0	0	0	0	0	0	0	0	0	0	0	0	0	0	0	0
ENSG00000253877	LINC01608	long intergenic non-protein coding RNA 1608 [Source:HGNC Symbol;Acc:HGNC:51662]	8:110937690-111027433	6.106	8.09436	7.66921	8.47061	7.64948	9.00672	7.89509	8.49663	9.15597	107	162	140	161	154	156	134	143	154
ENSG00000240068	RPL21P42	ribosomal protein L21 pseudogene 42 [Source:HGNC Symbol;Acc:HGNC:37017]	3:154023835-154024298	0	0	0	0	0	0	0	0	0	0	0	0	0	0	0	0	0	0
ENSG00000268500	AC018755.18	-	19:51612091-51646889	0	0	0	0	0	0	0	0.0208775	0	0	0	0	0	0	0	0	1	0
ENSG00000240063	RP11-225N10.1	-	3:182783236-182793394	0.127542	0.0446635	0.122438	0.0705611	0.0221959	0.0258028	0.158026	0.106245	0.132867	5	2	5	3	1	1	6	4	5
ENSG00000084754	HADHA	hydroxyacyl-CoA dehydrogenase/3-ketoacyl-CoA thiolase/enoyl-CoA hydratase (trifunctional protein), alpha subunit [Source:HGNC Symbol;Acc:HGNC:4801]	2:26190635-26244726	114.36	117.304	117.419	117.443	116.859	112.754	120.781	117.649	117.77	10204	11954	10914	11366	11979	9944	10438	10082	10086
ENSG00000240065	PSMB9	proteasome subunit beta 9 [Source:HGNC Symbol;Acc:HGNC:9546]	6:32844136-32859585	2.24822	2.09906	2.03707	1.9776	1.55757	1.68275	1.59879	1.77953	2.03162	196	209	185	187	156	145	135	149	170
ENSG00000256927	RP5-944M2.2	-	12:126425990-126434008	0	0	0	0	0	0	0	0	0	0	0	0	0	0	0	0	0	0
ENSG00000095637	SORBS1	sorbin and SH3 domain containing 1 [Source:HGNC Symbol;Acc:HGNC:14565]	10:95311771-95561414	0.976813	1.27985	1.24429	0.69425	1.03492	1.12744	1.04223	0.723356	1.10515	419	627	556	323	510	478	433	298	455
ENSG00000249780	RP11-352E6.2	-	4:12640298-12640637	0.140765	0.123284	0.2704	0.259607	0.122534	0.284893	0.290798	0.293267	0.293402	1	1	2	2	1	2	2	2	2
ENSG00000249781	CTD-2143L24.1	-	5:9641305-9903826	0	0	0	0.013706	0	0	0	0	0	0	0	0	1	0	0	0	0	0
ENSG00000249782	RP11-417J1.1	-	5:8525179-8528679	0	0	0	0	0	0	0	0	0	0	0	0	0	0	0	0	0	0
ENSG00000227017	AC007036.6	-	7:30176387-30179014	0	0.0621909	0	0	0	0	0	0	0	0	1	0	0	0	0	0	0	0
ENSG00000249785	CTD-2061E9.1	-	5:28286389-28287665	0	0	0	0	0	0	0	0	0	0	0	0	0	0	0	0	0	0
ENSG00000034713	GABARAPL2	GABA(A) receptor-associated protein like 2 [Source:HGNC Symbol;Acc:HGNC:13291]	16:75566351-75577881	13.5139	12.1126	11.1301	11.5135	9.93857	10.9492	11.1394	11.3256	11.5741	1225	1254	1051	1132	1035	981	978	986	1007
ENSG00000249787	RP11-346J10.1	-	5:100401441-100408899	0	0	0	0	0	0	0	0	0	0	0	0	0	0	0	0	0	0
ENSG00000176219	OR11H6	olfactory receptor family 11 subfamily H member 6 [Source:HGNC Symbol;Acc:HGNC:15349]	14:20223632-20224805	0	0	0	0	0	0	0	0	0	0	0	0	0	0	0	0	0	0
ENSG00000230528	NOS2P3	nitric oxide synthase 2 pseudogene 3 [Source:HGNC Symbol;Acc:HGNC:35124]	17:20436337-20447249	0	0	0	0.0117657	0	0	0.0263587	0.0265825	0.0265947	0	0	0	1	0	0	2	2	2
ENSG00000230529	CEACAMP9	carcinoembryonic antigen-related cell adhesion molecule pseudogene 9 [Source:HGNC Symbol;Acc:HGNC:1831]	19:43096456-43097360	0	0	0	0	0	0	0	0	0	0	0	0	0	0	0	0	0	0
ENSG00000230524	COL6A4P1	collagen, type VI, alpha 4 pseudogene 1 [Source:HGNC Symbol;Acc:HGNC:33484]	3:15151833-15205959	0.098562	0.112853	0.167396	0.230673	0.138588	0.230119	0.195692	0.213143	0.13428	13	17	23	33	21	30	25	27	17
ENSG00000230525	AC007403.2	-	2:66904436-66971462	0	0	0	0	0	0	0	0	0	0	0	0	0	0	0	0	0	0
ENSG00000091513	TF	transferrin [Source:HGNC Symbol;Acc:HGNC:11740]	3:133745956-133779006	0.222744	0.261198	0.236733	0.458398	0.412005	0.362183	0.472273	0.459703	0.406121	56	75	62	125	119	90	115	111	98
ENSG00000230520	RP11-533K11.1	-	7:118950386-118951259	0	0	0	0	0	0	0	0	0	0	0	0	0	0	0	0	0	0
ENSG00000230521	HCG4P7	HLA complex group 4 pseudogene 7 [Source:HGNC Symbol;Acc:HGNC:22926]	6:29887294-29888268	0	0.0429915	0	0	0	0	0	0.409019	0	0	1	0	0	0	0	0	8	0
ENSG00000230522	MBD3L2	methyl-CpG binding domain protein 3-like 2 [Source:HGNC Symbol;Acc:HGNC:18532]	19:7049321-7051735	0	0	0	0	0	0	0	0	0	0	0	0	0	0	0	0	0	0
ENSG00000230523	RP3-437I16.1	-	1:29329620-29350114	0	0	0	0	0	0	0	0	0.0232208	0	0	0	0	0	0	0	0	1
ENSG00000146047	HIST1H2BA	histone cluster 1, H2ba [Source:HGNC Symbol;Acc:HGNC:18730]	6:25726909-25727292	0	0	0.239417	0	0.108494	0.126124	0.128739	0	0	0	0	2	0	1	1	1	0	0
ENSG00000278907	AC005609.19	-	5:140849105-140849696	0	0	0	0	0	0	0	0	0	0	0	0	0	0	0	0	0	0
ENSG00000278905	RP11-65F13.3	-	5:93600357-93603598	0	0	0	0	0	0	0	0	0	0	0	0	0	0	0	0	0	0
ENSG00000278902	RP11-25L3.1	-	18:73921939-73922631	0	0	0	0	0	0	0	0	0	0	0	0	0	0	0	0	0	0
ENSG00000278903	CH507-145C22.1	-	21:6318434-6360415	0.892862	1.18004	1.02692	0.745534	0.93849	0.988568	1.11319	1.14892	0.991678	106	160	127	96	128	116	128	131	113
ENSG00000278900	RP11-1250I15.2	-	5:34105750-34106336	0.407829	0.357042	0.078271	0.150369	0.0709738	0.0825073	0.0842175	0.424663	0.169943	5	5	1	2	1	1	1	5	2
ENSG00000274150	FADS2P1	fatty acid desaturase 2 pseudogene 1 [Source:HGNC Symbol;Acc:HGNC:43618]	11:56890613-56927885	0	0	0	0	0	0	0	0	0	0	0	0	0	0	0	0	0	0
ENSG00000278908	RP11-523J2.1	-	2:30677762-30679895	0	0	0	0	0	0	0	0	0	0	0	0	0	0	0	0	0	0
ENSG00000278909	RP11-401P9.7	-	16:50555355-50558719	0	0	0	0	0	0	0	0	0	0	0	0	0	0	0	0	0	0
ENSG00000148225	WDR31	WD repeat domain 31 [Source:HGNC Symbol;Acc:HGNC:21421]	9:113313222-113340298	0.294917	0.292088	0.255261	0.561635	0.374537	0.445121	0.444257	0.543662	0.408002	61	69	55	126	89	91	89	108	81
ENSG00000133136	GNG5P2	guanine nucleotide binding protein (G protein), gamma 5 pseudogene 2 [Source:HGNC Symbol;Acc:HGNC:24826]	X:110346703-110346909	0	0.202496	0.221957	0	0	0.23397	0	0	0.240958	0	1	1	0	0	1	0	0	1
ENSG00000133135	RNF128	ring finger protein 128, E3 ubiquitin protein ligase [Source:HGNC Symbol;Acc:HGNC:21153]	X:106693794-106796993	0.0626035	0	0	0	0	0	0	0	0	5	0	0	0	0	0	0	0	0
ENSG00000133134	BEX2	brain expressed X-linked 2 [Source:HGNC Symbol;Acc:HGNC:30933]	X:103309346-103311046	2.26325	2.30085	1.66229	1.58249	2.40635	2.47425	2.16424	2.29327	1.9149	149	173	114	113	182	161	138	145	121
ENSG00000272426	RP11-108M9.6	-	1:16904339-16904776	0.218648	0	0.104897	0	0	0	0	0.113825	0.341632	2	0	1	0	0	0	0	1	3
ENSG00000138303	ASCC1	activating signal cointegrator 1 complex subunit 1 [Source:HGNC Symbol;Acc:HGNC:24268]	10:72096032-72217134	3.71391	3.48037	3.13877	3.9772	3.92632	3.91967	3.73522	3.89556	3.52587	811	868	714	942	985	846	790	817	739
ENSG00000222313	RN7SKP267	RNA, 7SK small nuclear pseudogene 267 [Source:HGNC Symbol;Acc:HGNC:45991]	X:148822164-148822448	0	0	0	0	0	0	0	0	0	0	0	0	0	0	0	0	0	0
ENSG00000148229	POLE3	polymerase (DNA directed), epsilon 3, accessory subunit [Source:HGNC Symbol;Acc:HGNC:13546]	9:113407235-113410672	41.5928	41.0897	40.5486	41.0258	43.0894	41.0481	40.4191	41.4051	38.9588	2892	3263	2937	3094	3442	2821	2722	2765	2600
ENSG00000138308	PLA2G12B	phospholipase A2 group XIIB [Source:HGNC Symbol;Acc:HGNC:18555]	10:72935170-72954778	0	0	0.122235	0.0391252	0.110839	0	0	0.0441981	0	0	0	3	1	3	0	0	1	0
ENSG00000133138	TBC1D8B	TBC1 domain family member 8B [Source:HGNC Symbol;Acc:HGNC:24715]	X:106802680-106876145	0.0327315	0.0537337	0.0353481	0.0414931	0.0569811	0.0496735	0.0760376	0.0255582	0.0170495	8	15	9	11	16	12	18	6	4
ENSG00000144579	CTDSP1	CTD small phosphatase 1 [Source:HGNC Symbol;Acc:HGNC:21614]	2:218398256-218405941	6.92174	5.74557	6.00406	6.98074	7.24713	6.55688	6.63733	6.3854	5.94815	1193	1131	1078	1305	1435	1117	1108	1057	984
ENSG00000067840	PDZD4	PDZ domain containing 4 [Source:HGNC Symbol;Acc:HGNC:21167]	X:153802166-153830565	0	0	0	0	0	0	0.0116264	0	0.00586527	0	0	0	0	0	0	2	0	1
ENSG00000146592	CREB5	cAMP responsive element binding protein 5 [Source:HGNC Symbol;Acc:HGNC:16844]	7:28299321-28825894	0.807832	0.969397	1.05664	0.216616	0.840444	1.03874	0.976952	1.02879	1.03614	251	344	342	73	300	319	294	307	309
ENSG00000248259	MTND4LP31	mitochondrially encoded NADH:ubiquinone oxidoreductase core subunit 4L pseudogene 31 [Source:HGNC Symbol;Acc:HGNC:52171]	4:64610616-64610909	0	0	0	0	0	0	0	0	0	0	0	0	0	0	0	0	0	0
ENSG00000227012	RP1-97J1.2	-	6:111900489-111901851	0.251296	0.165026	0.301597	0.115835	0	0.0635588	0.129752	0.392496	0.392742	4	3	5	2	0	1	2	6	6
ENSG00000248254	AC092597.3	-	4:47556731-47560259	0	0	0	0	0	0	0	0	0	0	0	0	0	0	0	0	0	0
ENSG00000248257	PSG10P	pregnancy specific beta-1-glycoprotein 10, pseudogene [Source:HGNC Symbol;Acc:HGNC:9515]	19:42839368-42855718	0	0	0	0	0	0	0	0	0	0	0	0	0	0	0	0	0	0
ENSG00000248256	OCIAD1-AS1	OCIAD1 antisense RNA 1 [Source:HGNC Symbol;Acc:HGNC:40751]	4:48852008-48860203	0	0	0	0	0	0	0	0	0	0	0	0	0	0	0	0	0	0
ENSG00000089177	KIF16B	kinesin family member 16B [Source:HGNC Symbol;Acc:HGNC:15869]	20:16272104-16573433	3.90267	4.13523	4.35002	3.825	3.94438	4.0868	4.08586	3.85001	3.72426	571	691	663	607	663	591	579	541	523
ENSG00000172828	CES3	carboxylesterase 3 [Source:HGNC Symbol;Acc:HGNC:1865]	16:66961237-66975148	0.397411	0.453273	0.321264	0.337476	0.50523	0.476147	0.512898	0.490016	0.484876	76	99	64	70	111	90	95	90	89
ENSG00000249128	RP11-2N5.1	-	5:118596188-118628092	0	0	0	0	0	0	0	0	0	0	0	0	0	0	0	0	0	0
ENSG00000254692	RP11-468E2.1	-	14:24189157-24213473	2.70842	0	0.872251	3.802	0	0	0	6.25865	1.18334	155	0	52	236	0	0	0	344	65
ENSG00000141068	KSR1	kinase suppressor of ras 1 [Source:HGNC Symbol;Acc:HGNC:6465]	17:27456714-27626438	3.09248	4.31237	3.95374	3.86395	4.12729	3.79281	3.82459	3.94672	3.83621	1112	1771	1481	1507	1705	1348	1332	1363	1324
ENSG00000137309	HMGA1	high mobility group AT-hook 1 [Source:HGNC Symbol;Acc:HGNC:5010]	6:34236873-34246231	236.243	246.312	252.705	248.505	286.162	251.548	259.737	261.822	243.526	21706	25847	24187	24765	30206	22844	23114	23104	21476
ENSG00000144681	STAC	SH3 and cysteine rich domain [Source:HGNC Symbol;Acc:HGNC:11353]	3:36380344-36548007	0	0	0	0	0	0	0	0	0	0	0	0	0	0	0	0	0	0
ENSG00000254693	RP11-58K22.5	-	11:44604508-44605337	0	0	0	0	0	0	0	0	0	0	0	0	0	0	0	0	0	0
ENSG00000172824	CES4A	carboxylesterase 4A [Source:HGNC Symbol;Acc:HGNC:26741]	16:66988589-67009758	0	0.00379543	0.00832452	0.00399613	0	0.00438535	0	0	0	0	1	2	1	0	1	0	0	0
ENSG00000066468	FGFR2	fibroblast growth factor receptor 2 [Source:HGNC Symbol;Acc:HGNC:3689]	10:121478334-121598458	0	0	0	0	0	0	0	0	0	0	0	0	0	0	0	0	0	0
ENSG00000268995	VN1R82P	vomeronasal 1 receptor 82 pseudogene [Source:HGNC Symbol;Acc:HGNC:37402]	19:21188598-21188953	0.134438	0.235487	0.129059	0.247939	0.117027	0.136044	0.277728	0.140043	0.140108	1	2	1	2	1	1	2	1	1
ENSG00000241333	RN7SL385P	RNA, 7SL, cytoplasmic 385, pseudogene [Source:HGNC Symbol;Acc:HGNC:46401]	22:37669464-37669739	0	0	0	0	0	0	0	0	0	0	0	0	0	0	0	0	0	0
ENSG00000268997	DNAJC19P3	DnaJ heat shock protein family (Hsp40) member C19 pseudogene 3 [Source:HGNC Symbol;Acc:HGNC:45066]	19:41638569-41638899	0	0	0	0	0	0	0	0	0	0	0	0	0	0	0	0	0	0
ENSG00000268991	FAM231C	family with sequence similarity 231 member C [Source:HGNC Symbol;Acc:HGNC:49508]	1:16539066-16539575	0	0	0	0	0	0	0	0	0	0	0	0	0	0	0	0	0	0
ENSG00000268992	CDC42EP3P1	CDC42 effector protein (Rho GTPase binding) 3 pseudogene 1 [Source:HGNC Symbol;Acc:HGNC:49673]	19:23384530-23385293	0	0	0	0	0	0	0	0	0	0	0	0	0	0	0	0	0	0
ENSG00000268993	RP11-439A17.5	-	1:121142051-121142438	0	0	0	0	0	0.124824	0	0	0	0	0	0	0	0	1	0	0	0
ENSG00000205174	C7orf66	chromosome 7 open reading frame 66 [Source:HGNC Symbol;Acc:HGNC:33712]	7:108883975-108884587	0	0	0	0	0	0	0	0	0	0	0	0	0	0	0	0	0	0
ENSG00000173193	PARP14	poly(ADP-ribose) polymerase family member 14 [Source:HGNC Symbol;Acc:HGNC:29232]	3:122680618-122730840	2.52284	3.23226	3.14328	2.8327	2.79542	2.97453	3.0013	2.99222	2.68021	762	1115	989	928	970	888	878	868	777
ENSG00000266923	RP11-693J15.4	-	12:92421531-92483680	0	0	0	0	0	0	0	0	0	0	0	0	0	0	0	0	0	0
ENSG00000067596	DHX8	DEAH (Asp-Glu-Ala-His) box polypeptide 8 [Source:HGNC Symbol;Acc:HGNC:2749]	17:43483865-43544463	6.00855	6.11819	6.3252	6.53021	6.20295	6.07472	6.3781	6.28774	6.34135	1387	1613	1521	1635	1645	1386	1426	1394	1405
ENSG00000266922	CTC-499B15.6	-	19:11725961-11730783	0.0974745	0.08537	0.280817	0.0898843	0.0848506	0.0986391	0.100684	0.101539	0.20317	1	1	3	1	1	1	1	1	2
ENSG00000116604	MEF2D	myocyte enhancer factor 2D [Source:HGNC Symbol;Acc:HGNC:6997]	1:156463727-156500828	4.06514	4.5321	3.61635	4.11109	3.32308	3.54065	3.09703	3.10746	3.50402	805	1025	746	883	756	693	594	591	666
ENSG00000070808	CAMK2A	calcium/calmodulin-dependent protein kinase II alpha [Source:HGNC Symbol;Acc:HGNC:1460]	5:150219491-150290291	0.12669	0.105886	0.110563	0.14335	0.0902281	0.0582651	0.124862	0.113923	0.125998	22	21	20	27	18	10	21	19	21
ENSG00000227893	LINC00352	long intergenic non-protein coding RNA 352 [Source:HGNC Symbol;Acc:HGNC:42670]	13:23498796-23502874	0	0	0	0	0	0	0	0	0	0	0	0	0	0	0	0	0	0
ENSG00000269154	BNIP3P13	BCL2/adenovirus E1B 19kDa interacting protein 3 pseudogene 13 [Source:HGNC Symbol;Acc:HGNC:49693]	19:20062755-20063320	0	0	0	0	0	0	0	0	0	0	0	0	0	0	0	0	0	0
ENSG00000223042	RN7SKP161	RNA, 7SK small nuclear pseudogene 161 [Source:HGNC Symbol;Acc:HGNC:45885]	12:10084186-10084490	0	0	0	0	0	0	0	0	0	0	0	0	0	0	0	0	0	0
ENSG00000279749	RP11-625B21.1	-	4:136553236-136553739	0	0	0	0	0	0	0	0	0	0	0	0	0	0	0	0	0	0
ENSG00000279748	CTD-3222D19.9	-	19:16586905-16589409	0	0.0836661	0.0183413	0.0704896	0.0831899	0.0966899	0.0197348	0.0398047	0.039823	0	5	1	4	5	5	1	2	2
ENSG00000279747	CTA-363E6.8	-	16:19503861-19504625	0	0	0	0	0	0	0	0	0	0	0	0	0	0	0	0	0	0
ENSG00000274114	CTC-281F24.3	-	17:6657034-6693577	0	0.0140002	0	0.00737027	0	0.0161763	0	0.0249777	0	0	2	0	1	0	2	0	3	0
ENSG00000279745	AL365202.1	-	9:3452305-3453987	0	0.142574	0.312707	0.150113	0	0.164734	0	0	0	0	1	2	1	0	1	0	0	0
ENSG00000279744	RP13-20L14.10	-	17:82462601-82464255	3.44256	7.32032	5.22091	7.8415	8.30977	8.42944	7.46714	9.09664	9.1928	119	289	188	294	330	288	250	302	305
ENSG00000279743	CTB-43I4.1	-	17:51761260-51763397	0	0	0	0	0	0	0	0	0	0	0	0	0	0	0	0	0	0
ENSG00000279742	RP11-700A24.1	-	11:85852557-85854943	0.140412	0.158061	0.17329	0.147948	0.192058	0.405858	0.207083	0.208841	0.0835832	7	9	9	8	11	20	10	10	4
ENSG00000279741	RP11-44F14.9	-	16:53389886-53390563	0	0	0	0	0	0.0714333	0	0	0	0	0	0	0	0	1	0	0	0
ENSG00000080189	SLC35C2	solute carrier family 35 (GDP-fucose transporter), member C2 [Source:HGNC Symbol;Acc:HGNC:17117]	20:46345980-46364458	3.42151	2.95205	2.78559	2.65693	3.06232	3.01338	2.61764	2.65714	2.53386	1027	1012	871	865	1056	894	761	766	730
ENSG00000147883	CDKN2B	cyclin-dependent kinase inhibitor 2B (p15, inhibits CDK4) [Source:HGNC Symbol;Acc:HGNC:1788]	9:22002903-22009363	0	0	0	0	0	0	0.00846646	0	0	0	0	0	0	0	0	1	0	0
ENSG00000147885	IFNA16	interferon, alpha 16 [Source:HGNC Symbol;Acc:HGNC:5421]	9:21216373-21217311	0	0	0	0	0	0	0	0	0	0	0	0	0	0	0	0	0	0
ENSG00000147889	CDKN2A	cyclin-dependent kinase inhibitor 2A [Source:HGNC Symbol;Acc:HGNC:1787]	9:21967753-21995301	0	0	0	0.00504668	0	0.0110765	0.00565302	0.0171031	0.00570363	0	0	0	1	0	2	1	3	1
ENSG00000101935	AMMECR1	Alport syndrome, mental retardation, midface hypoplasia and elliptocytosis chromosomal region gene 1 [Source:HGNC Symbol;Acc:HGNC:467]	X:110194186-110440233	4.33089	4.76783	5.04455	5.00581	5.13685	5.52533	6.35514	6.25613	6.26008	1092	1373	1325	1369	1488	1377	1552	1515	1515
ENSG00000101938	CHRDL1	chordin-like 1 [Source:HGNC Symbol;Acc:HGNC:29861]	X:110673856-110795819	0.014148	0.00619245	0.0271571	0.0195661	0.0184704	0.0143099	0.0146065	0.0368263	0.0221059	2	1	4	3	3	2	2	5	3
ENSG00000130656	HBZ	hemoglobin subunit zeta [Source:HGNC Symbol;Acc:HGNC:4835]	16:152687-154503	307.559	238.199	237.412	498.014	439.545	439.616	505.783	481.671	551.744	4850	4290	3900	8518	7963	6852	7725	7295	8351
ENSG00000130653	PNPLA7	patatin like phospholipase domain containing 7 [Source:HGNC Symbol;Acc:HGNC:24768]	9:137459953-137550534	0.195379	0.220363	0.17166	0.155708	0.170066	0.194324	0.153856	0.199984	0.175958	59	76	54	51	59	58	45	58	51
ENSG00000223591	CENPVP1	centromere protein V pseudogene 1 [Source:HGNC Symbol;Acc:HGNC:31851]	X:51710512-51712131	0	0	0	0	0	0	0	0	0	0	0	0	0	0	0	0	0	0
ENSG00000241291	RN7SL791P	RNA, 7SL, cytoplasmic 791, pseudogene [Source:HGNC Symbol;Acc:HGNC:46807]	5:146656401-146656695	0	0	0	0	0	0	0	0	0	0	0	0	0	0	0	0	0	0
ENSG00000259175	RP11-379K22.2	-	15:80554609-80562944	0	0	0	0	0	0	0	0	0	0	0	0	0	0	0	0	0	0
ENSG00000113389	NPR3	natriuretic peptide receptor 3 [Source:HGNC Symbol;Acc:HGNC:7945]	5:32689070-32791724	0.0054198	0.011861	0.00780311	0.00499527	0.00471785	0.00274091	0.0139886	0.0112859	0.0254078	2	5	3	2	2	1	5	4	9
ENSG00000223595	LYPLA1P1	lysophospholipase I pseudogene 1 [Source:HGNC Symbol;Acc:HGNC:44005]	7:123230120-123230741	0	0	0	0	0	0	0	0	0	0	0	0	0	0	0	0	0	0
ENSG00000223597	CTD-2296D1.5	-	5:7373117-7379790	0	0	0	0	0	0	0	0	0	0	0	0	0	0	0	0	0	0
ENSG00000180846	CSNK1G2-AS1	CSNK1G2 antisense RNA 1 [Source:HGNC Symbol;Acc:HGNC:28604]	19:1952531-1954586	0	0	0	0	0	0	0	0	0	0	0	0	0	0	0	0	0	0
ENSG00000223599	RP11-216N14.7	-	1:153852106-153853414	0.109723	0.192163	0.0702337	0.202324	0.0318271	0	0.30209	0.152347	0	3	6	2	6	1	0	8	4	0
ENSG00000223598	RP1-292B18.4	-	6:151088103-151228447	0	0	0	0	0	0	0	0	0	0	0	0	0	0	0	0	0	0
ENSG00000067334	DNTTIP2	deoxynucleotidyltransferase, terminal, interacting protein 2 [Source:HGNC Symbol;Acc:HGNC:24013]	1:93866283-93879918	10.4132	8.34944	9.50614	8.33943	8.41692	9.32193	9.13427	8.13817	8.41699	2101	1924	1998	1825	1951	1859	1785	1577	1630
ENSG00000113387	SUB1	SUB1 homolog, transcriptional regulator [Source:HGNC Symbol;Acc:HGNC:19985]	5:32531633-32604079	16.3849	14.7381	15.1875	15.0561	13.7966	16.673	16.4137	16.3518	16.2105	4504	4627	4349	4489	4357	4530	4370	4317	4277
ENSG00000113384	GOLPH3	golgi phosphoprotein 3 (coat-protein) [Source:HGNC Symbol;Acc:HGNC:15452]	5:32124704-32174350	32.3508	29.8601	29.945	26.4011	27.1323	29.5391	30.5787	27.7963	30.4309	2769	2919	2670	2451	2668	2499	2535	2285	2500
ENSG00000099985	OSM	oncostatin M [Source:HGNC Symbol;Acc:HGNC:8506]	22:30262829-30266840	0.165874	0.145236	0.217135	0.180744	0.105013	0.244112	0.0934217	0.251224	0.125693	11	11	15	13	8	16	6	16	8
ENSG00000099984	GSTT2	glutathione S-transferase theta 2 (gene/pseudogene) [Source:HGNC Symbol;Acc:HGNC:4642]	22:23980058-23983915	0	0.0179977	0.0197274	0	0.0357941	0	0.0212261	0	0	0	1	1	0	2	0	1	0	0
ENSG00000235545	RP11-230B22.1	-	1:62688482-62710694	0.194948	0.204839	0.149696	0.21567	0.475104	0.749472	0.523301	0.365349	0.609304	5	6	4	6	14	19	13	9	15
ENSG00000235544	RPS11P1	ribosomal protein S11 pseudogene 1 [Source:HGNC Symbol;Acc:HGNC:16553]	20:11345383-11345855	0	0	0	0	0	0	0	0	0	0	0	0	0	0	0	0	0	0
ENSG00000235547	NDUFB11P1	NADH:ubiquinone oxidoreductase subunit B11 pseudogene 1 [Source:HGNC Symbol;Acc:HGNC:33980]	11:92336032-92336496	0	0	0	0	0	0	0	0	0	0	0	0	0	0	0	0	0	0
ENSG00000235546	AC087499.5	-	17:20612667-20614008	0.0356632	0.0312345	0.0342363	0	0	0	0	0.0743002	0.0743343	1	1	1	0	0	0	0	2	2
ENSG00000076258	FMO4	flavin containing monooxygenase 4 [Source:HGNC Symbol;Acc:HGNC:3772]	1:171314208-171342084	0	0	0.0261851	0.0377223	0.0237438	0.0551912	0.0422407	0.0425994	0	0	0	2	3	2	4	3	3	0
ENSG00000212511	U3	Small nucleolar RNA U3 [Source:RFAM;Acc:RF00012]	15:36852640-36852859	0	0	0	0	0	0	0	0	0	0	0	0	0	0	0	0	0	0
ENSG00000235549	EIF1P2	eukaryotic translation initiation factor 1 pseudogene 2 [Source:HGNC Symbol;Acc:HGNC:49615]	1:38958275-38958925	0	0	0	0	0	0	0	0	0	0	0	0	0	0	0	0	0	0
ENSG00000235548	AC073551.1	-	2:156033247-156034080	0.0573861	0.10052	0.220415	0.26464	0.149911	0.406561	0.296377	0.179336	0	1	2	4	5	3	7	5	3	0
ENSG00000234634	AC003664.1	-	17:13299184-13306760	0	0	0	0	0	0	0	0	0	0	0	0	0	0	0	0	0	0
ENSG00000234636	MED14OS	MED14 opposite strand [Source:HGNC Symbol;Acc:HGNC:40162]	X:40735400-40738701	0.0531778	0	0	0	0.0462907	0	0	0	0	1	0	0	0	1	0	0	0	0
ENSG00000234637	RPS19P6	ribosomal protein S19 pseudogene 6 [Source:HGNC Symbol;Acc:HGNC:36217]	9:80782338-80782770	0	0	0	0	0	0	0	0	0	0	0	0	0	0	0	0	0	0
ENSG00000234630	LL22NC03-2H8.4	-	22:22293733-22294794	0	0	0	0	0	0	0	0	0	0	0	0	0	0	0	0	0	0
ENSG00000234632	NECAP1P2	NECAP endocytosis associated 1 pseudogene 2 [Source:HGNC Symbol;Acc:HGNC:43913]	2:74350069-74351009	0	0	0	0	0	0	0	0	0	0	0	0	0	0	0	0	0	0
ENSG00000255951	RP11-967K21.2	-	12:28164958-28165662	0	0	0	0	0	0	0	0	0	0	0	0	0	0	0	0	0	0
ENSG00000180592	SKIDA1	SKI/DACH domain containing 1 [Source:HGNC Symbol;Acc:HGNC:32697]	10:21513478-21526368	0.0797977	0.0621065	0.0936215	0.0572218	0.069459	0.0897022	0.0640787	0.0784668	0.0692801	18	16	22	14	18	20	14	17	15
ENSG00000228948	SLC25A6P5	solute carrier family 25 (mitochondrial carrier; adenine nucleotide translocator), member 6 pseudogene 5 [Source:HGNC Symbol;Acc:HGNC:43854]	9:105849710-105851425	0.0247723	0.043392	0.0475859	0.0228433	0	0	0.0767634	0.0258051	0.154902	1	2	2	1	0	0	3	1	6
ENSG00000061656	SPAG4	sperm associated antigen 4 [Source:HGNC Symbol;Acc:HGNC:11214]	20:35615892-35621049	2.11002	1.90873	2.08149	1.45098	1.44091	1.98147	1.58878	1.80856	1.99189	181	187	186	135	142	168	132	149	164
ENSG00000180596	HIST1H2BC	histone cluster 1, H2bc [Source:HGNC Symbol;Acc:HGNC:4757]	6:26114873-26123926	19.0733	23.1416	18.7953	21.8197	22.667	19.1397	21.0993	22.0478	23.1162	490	679	503	608	669	486	525	544	570
ENSG00000073578	SDHA	succinate dehydrogenase complex subunit A, flavoprotein (Fp) [Source:HGNC Symbol;Acc:HGNC:10680]	5:218241-256700	16.8121	16.2518	15.6418	17.2773	16.4848	15.972	16.186	16.1837	15.6829	4902	5412	4751	5464	5522	4603	4571	4532	4389
ENSG00000180884	ZNF792	zinc finger protein 792 [Source:HGNC Symbol;Acc:HGNC:24751]	19:34956354-34964049	2.26223	2.01973	2.24285	2.3866	2.22739	2.19124	2.02937	2.23962	1.93193	305	311	315	349	345	292	265	290	250
ENSG00000228945	CLUHP2	clustered mitochondria (cluA/CLU1) homolog pseudogene 2 [Source:HGNC Symbol;Acc:HGNC:38453]	Y:18280178-18284761	0	0	0	0	0	0	0	0	0	0	0	0	0	0	0	0	0	0
ENSG00000169203	RP11-231C14.4	-	16:29483642-29505999	0.18386	0.135228	0.0776619	0.101709	0.160042	0.119056	0.0683366	0.09955	0.107273	25	21	11	15	25	16	9	13	14
ENSG00000228944	AC004485.3	-	7:24196662-24255719	0	0	0	0	0	0	0	0	0	0	0	0	0	0	0	0	0	0
ENSG00000089009	RPL6	ribosomal protein L6 [Source:HGNC Symbol;Acc:HGNC:10362]	12:112405190-112418838	82.8752	75.9729	82.8383	79.2779	72.6004	79.6499	77.417	82.6791	86.7942	13261	13884	13808	13759	13346	12597	11998	12706	13330
ENSG00000261348	RP11-510M2.1	-	16:71410440-71426464	0	0	0	0	0	0	0	0	0	0	0	0	0	0	0	0	0	0
ENSG00000261349	RP3-465N24.5	-	1:25266102-25267136	4.7982	7.39779	8.21085	7.30888	5.99245	5.69882	8.6157	8.4714	6.30325	46	81	82	76	66	54	80	78	58
ENSG00000273464	RP11-313P22.1	-	21:29657406-29657831	0.224807	0.393584	0	0.103599	0.0977973	0.227379	0	0.468126	0	2	4	0	1	1	2	0	4	0
ENSG00000261347	AP000439.5	-	11:69467598-69469705	0	0	0	0	0	0	0	0	0	0	0	0	0	0	0	0	0	0
ENSG00000169208	OR10G3	olfactory receptor family 10 subfamily G member 3 [Source:HGNC Symbol;Acc:HGNC:8171]	14:21569803-21570744	0	0	0	0	0	0	0	0	0	0	0	0	0	0	0	0	0	0
ENSG00000089006	SNX5	sorting nexin 5 [Source:HGNC Symbol;Acc:HGNC:14969]	20:17941597-17968980	9.2595	8.88034	9.00427	8.55405	8.41448	8.61876	7.26574	8.67376	7.69844	3000	3286	3039	3006	3132	2760	2280	2699	2394
ENSG00000261342	AC006538.1	-	19:2727743-2729327	1.60097	1.58691	1.59486	1.94948	1.65647	2.01706	1.65296	1.38387	1.57357	53	60	55	70	63	66	53	44	50
ENSG00000273461	RP11-398A8.4	-	3:72061061-72069933	0	0	0	0	0	0	0	0	0	0	0	0	0	0	0	0	0	0
ENSG00000261340	LINC01616	long intergenic non-protein coding RNA 1616 [Source:HGNC Symbol;Acc:HGNC:51900]	11:29980113-29982392	0	0	0	0	0	0	0	0	0	0	0	0	0	0	0	0	0	0
ENSG00000261341	CTD-2568A17.1	-	19:50776141-50786210	0	0	0	0	0	0	0.138475	0	0	0	0	0	0	0	0	2	0	0
ENSG00000279336	AL353662.2	-	9:34201273-34201515	0	0	0	0	0	0	0	0	0	0	0	0	0	0	0	0	0	0
ENSG00000264192	RN7SL117P	RNA, 7SL, cytoplasmic 117, pseudogene [Source:HGNC Symbol;Acc:HGNC:46133]	2:21922993-21923288	0	0	0	0	0	0	0	0	0	0	0	0	0	0	0	0	0	0
ENSG00000269118	FAM90A28P	family with sequence similarity 90 member A28, pseudogene [Source:HGNC Symbol;Acc:HGNC:43747]	19:53299051-53308644	0	0	0	0	0	0	0	0	0	0	0	0	0	0	0	0	0	0
ENSG00000256690	RP11-727F15.9	-	11:62832234-62834043	0	0.149436	0.0819394	0.0786688	0.185731	0	0.264362	0.133303	0.0444548	0	4	2	2	5	0	6	3	1
ENSG00000264196	RP11-171G2.1	-	17:72839039-72839718	0	0	0	0	0	0	0	0	0	0	0	0	0	0	0	0	0	0
ENSG00000255959	RP11-804A23.2	-	11:60835996-60842965	0	0	0	0	0	0	0	0	0	0	0	0	0	0	0	0	0	0
ENSG00000269113	TRABD2B	TraB domain containing 2B [Source:HGNC Symbol;Acc:HGNC:44200]	1:47760528-47996895	0	0	0	0	0	0	0	0	0	0	0	0	0	0	0	0	0	0
ENSG00000269110	CTC-513N18.7	-	19:20553792-20661583	0	0.0803002	0	0	0	0.0927812	0	0	0	0	1	0	0	0	1	0	0	0
ENSG00000117266	CDK18	cyclin-dependent kinase 18 [Source:HGNC Symbol;Acc:HGNC:8751]	1:205504595-205532793	0.016568	0.0314315	0.0238576	0.0229142	0.0312473	0.030733	0.00855387	0.0172501	0.0258943	6	13	9	9	13	11	3	6	9
ENSG00000117262	GPR89A	G protein-coupled receptor 89A [Source:HGNC Symbol;Acc:HGNC:31984]	1:145607990-145670648	0.851182	0.966603	0.856718	0.708669	0.776827	0.767229	0.868173	0.902377	0.892194	165	214	173	149	173	147	163	168	166
ENSG00000107831	FGF8	fibroblast growth factor 8 [Source:HGNC Symbol;Acc:HGNC:3686]	10:101770130-101780369	0.0514242	0.0600311	0.1481	0.063221	0.0596805	0.0346808	0.0353997	0.142783	0	3	4	9	4	4	2	2	8	0
ENSG00000107833	NPM3	nucleophosmin/nucleoplasmin 3 [Source:HGNC Symbol;Acc:HGNC:7931]	10:101781325-101783413	49.8429	34.9601	36.3283	44.0869	42.4523	39.3123	33.5699	38.5972	38.9628	1674	1341	1271	1606	1638	1305	1092	1245	1256
ENSG00000224060	ARSEP1	arylsulfatase E pseudogene 1 [Source:HGNC Symbol;Acc:HGNC:720]	Y:12339813-12347495	0	0	0	0	0	0	0	0	0	0	0	0	0	0	0	0	0	0
ENSG00000224061	AC092106.1	-	2:106253231-106253717	0	0	0	0	0	0	0	0	0	0	0	0	0	0	0	0	0	0
ENSG00000156509	FBXO43	F-box protein 43 [Source:HGNC Symbol;Acc:HGNC:28521]	8:100133360-100145800	0.0179307	0.0470964	0.0344179	0.0247974	0.0156084	0.0544168	0.101805	0.00933448	0.037355	2	6	4	3	2	6	11	1	4
ENSG00000224063	AC007319.1	-	2:187003220-187554663	0	0.187633	0.0587826	0.0846823	0.0266379	0.0928999	0	0.254983	0	0	7	2	3	1	3	0	8	0
ENSG00000224064	RP11-344H11.5	-	1:26983628-26984024	0	0	0	0	0.104941	0	0	0	0	0	0	0	0	1	0	0	0	0
ENSG00000224066	RP4-622L5.7	-	1:32204769-32206814	0.234708	0.205503	0.160936	0.123653	0.116728	0.169614	0.0346188	0.139651	0.244537	7	7	5	4	4	5	1	4	7
ENSG00000224067	RP11-430K21.2	-	9:111802980-111803435	0	0.101493	0	0	0.100876	0	0	0	0.120771	0	1	0	0	1	0	0	0	1
ENSG00000224069	CTD-2183H9.7	-	X:154897561-154898092	0	0	0	0	0	0	0	0	0	0	0	0	0	0	0	0	0	0
ENSG00000156500	FAM122C	family with sequence similarity 122C [Source:HGNC Symbol;Acc:HGNC:25202]	X:134796789-134854610	0.793749	1.05394	0.933616	1.05751	1.02118	1.0634	1.31034	1.385	1.40404	182	276	223	263	269	241	291	305	309
ENSG00000060303	RPS17P5	ribosomal protein S17 pseudogene 5 [Source:HGNC Symbol;Acc:HGNC:21352]	6:50857255-50857662	0	0	0	0	0	0	0	0	0	0	0	0	0	0	0	0	0	0
ENSG00000264444	SDHCP1	succinate dehydrogenase complex subunit C pseudogene 1 [Source:HGNC Symbol;Acc:HGNC:31734]	18:68866517-68867028	0	0	0	0	0	0	0	0.0973739	0	0	0	0	0	0	0	0	1	0
ENSG00000156504	FAM122B	family with sequence similarity 122B [Source:HGNC Symbol;Acc:HGNC:30490]	X:134769566-134797232	2.85262	2.67996	3.02703	2.62648	2.86556	2.80031	3.08456	3.04644	2.98009	740	794	818	739	854	718	775	759	742
ENSG00000267182	SNRPCP20	small nuclear ribonucleoprotein polypeptide C pseudogene 20 [Source:HGNC Symbol;Acc:HGNC:49835]	16:5289200-5289409	0	0	0	0	0	0	0	0	0	0	0	0	0	0	0	0	0	0
ENSG00000267187	RP11-767C4.1	-	18:47703175-47703745	0	0	0	0	0	0	0	0	0	0	0	0	0	0	0	0	0	0
ENSG00000267185	PTP4A2P1	protein tyrosine phosphatase type IVA, member 2 pseudogene 1 [Source:HGNC Symbol;Acc:HGNC:9637]	17:42533532-42534009	5.90961	6.31442	4.99993	7.29544	6.8005	6.08033	6.51516	6.67457	5.32216	59	72	52	79	78	60	63	64	51
ENSG00000103642	LACTB	lactamase beta [Source:HGNC Symbol;Acc:HGNC:16468]	15:63121800-63142061	5.07552	4.97268	5.01718	4.00974	3.98271	4.97285	4.25655	4.40062	4.44272	538	602	554	461	485	521	437	448	452
ENSG00000267188	CTC-512J12.4	-	19:44392439-44448452	0	0	0	0	0.0725813	0	0	0	0	0	0	0	0	1	0	0	0	0
ENSG00000267189	ATP5LP7	ATP synthase, H+ transporting, mitochondrial Fo complex subunit G pseudogene 7 [Source:HGNC Symbol;Acc:HGNC:38169]	17:42647834-42648143	0	0	0.14821	0	0	0	0	0	0	0	0	1	0	0	0	0	0	0
ENSG00000103647	CORO2B	coronin, actin binding protein, 2B [Source:HGNC Symbol;Acc:HGNC:2256]	15:68578969-68727806	0.00803155	0	0	0	0	0	0	0	0	1	0	0	0	0	0	0	0	0
ENSG00000263873	RP11-334E6.12	-	11:119417951-119419114	0	0	0	0	0.0659203	0	0	0	0	0	0	0	0	1	0	0	0	0
ENSG00000263870	CTD-2350C19.5	-	17:28444063-28445563	0	0	0	0	0	0	0	0	0	0	0	0	0	0	0	0	0	0
ENSG00000263874	LINC00672	long intergenic non-protein coding RNA 672 [Source:HGNC Symbol;Acc:HGNC:44353]	17:38925168-38928057	0.242922	0.194979	0.0777277	0.167986	0.0528652	0.163849	0.0836121	0.147542	0.147653	12	11	4	9	3	8	4	7	7
ENSG00000263878	DLGAP1-AS4	DLGAP1 antisense RNA 4 [Source:HGNC Symbol;Acc:HGNC:44333]	18:3962353-4013943	0	0	0	0	0	0	0	0	0	0	0	0	0	0	0	0	0	0
ENSG00000022556	NLRP2	NLR family, pyrin domain containing 2 [Source:HGNC Symbol;Acc:HGNC:22948]	19:54953130-55001142	4.70276	5.11409	4.81626	5.05027	4.84895	4.68629	4.43942	5.02566	4.6136	1062	1319	1133	1237	1258	1046	971	1090	1000
ENSG00000181074	OR52N4	olfactory receptor family 52 subfamily N member 4 (gene/pseudogene) [Source:HGNC Symbol;Acc:HGNC:15230]	11:5754693-5755729	0	0	0	0	0	0.0467038	0	0	0	0	0	0	0	0	1	0	0	0
ENSG00000076928	ARHGEF1	Rho guanine nucleotide exchange factor 1 [Source:HGNC Symbol;Acc:HGNC:681]	19:41883161-41930150	12.3292	11.809	12.6103	11.8582	11.9326	11.4833	10.9091	11.0979	11.3668	3727	4077	3971	3888	4144	3431	3194	3222	3298
ENSG00000181072	CHRM2	cholinergic receptor, muscarinic 2 [Source:HGNC Symbol;Acc:HGNC:1951]	7:136868669-137020255	0	0	0	0.00303446	0	0	0	0	0	0	0	0	1	0	0	0	0	0
ENSG00000076924	XAB2	XPA binding protein 2 [Source:HGNC Symbol;Acc:HGNC:14089]	19:7619525-7629565	18.9267	16.4151	17.6731	17.9195	17.2716	16.9407	16.5344	16.6671	17.0937	2749	2723	2674	2823	2882	2432	2326	2325	2383
ENSG00000143337	TOR1AIP1	torsin A interacting protein 1 [Source:HGNC Symbol;Acc:HGNC:29456]	1:179882042-179925000	3.23597	3.17847	3.33061	3.40968	3.39489	3.04011	3.17777	3.12613	3.3461	1330	1492	1426	1520	1603	1235	1265	1234	1320
ENSG00000143333	RGS16	regulator of G-protein signaling 16 [Source:HGNC Symbol;Acc:HGNC:9997]	1:182598623-182604408	1.14418	1.01909	1.21199	1.3459	1.47673	1.69649	1.87383	1.62267	1.21264	58	59	64	74	86	85	92	79	59
ENSG00000134020	PEBP4	phosphatidylethanolamine binding protein 4 [Source:HGNC Symbol;Acc:HGNC:28319]	8:22713251-23000000	0	0	0	0	0	0	0	0	0	0	0	0	0	0	0	0	0	0
ENSG00000168152	THAP9	THAP domain containing 9 [Source:HGNC Symbol;Acc:HGNC:23192]	4:82900684-82919969	1.19208	1.01275	1.08203	0.952155	0.369849	1.27175	0.359486	0.964698	1.44489	202	196	191	175	72	213	59	157	235
ENSG00000189241	TSPYL1	TSPY-like 1 [Source:HGNC Symbol;Acc:HGNC:12382]	6:116276578-116279903	38.5498	39.0093	40.5714	40.1205	38.2415	40.4588	38.9248	39.8837	39.039	2678	3095	2936	3023	3052	2778	2619	2661	2603
ENSG00000168159	RNF187	ring finger protein 187 [Source:HGNC Symbol;Acc:HGNC:27146]	1:228487061-228495766	47.8636	46.2891	42.6952	49.3558	49.7926	49.0135	45.5985	44.6414	44.0937	3377	3730	3138	3777	4036	3418	3116	3025	2986
ENSG00000111837	MAK	male germ cell-associated kinase [Source:HGNC Symbol;Acc:HGNC:6816]	6:10762723-10838555	0.387172	0.40559	0.504407	0.401582	0.33701	0.433684	0.285527	0.36713	0.302533	56	67	76	63	56	62	40	51	42
ENSG00000111834	RSPH4A	radial spoke head 4 homolog A (Chlamydomonas) [Source:HGNC Symbol;Acc:HGNC:21558]	6:116616479-116632985	0.035752	0	0.0429083	0.0412079	0.0233432	0.00904253	0.0830604	0.027925	0	4	0	5	5	3	1	9	3	0
ENSG00000111832	RWDD1	RWD domain containing 1 [Source:HGNC Symbol;Acc:HGNC:20993]	6:116571367-116597675	7.35702	6.88111	6.06831	6.19134	6.18264	6.96131	7.0646	6.34381	6.42062	1158	1237	995	1057	1118	1083	1077	959	970
ENSG00000219619	RP11-126M14.1	-	6:115358498-115358752	0	0	0	0	0	0	0	0	0	0	0	0	0	0	0	0	0	0
ENSG00000262693	RP11-46I8.3	-	17:5075678-5078113	0	0	0	0	0	0	0	0	0	0	0	0	0	0	0	0	0	0
ENSG00000171903	CYP4F11	cytochrome P450 family 4 subfamily F member 11 [Source:HGNC Symbol;Acc:HGNC:13265]	19:15912367-15934867	0	0	0	0	0	0	0	0	0	0	0	0	0	0	0	0	0	0
ENSG00000244203	FOXP1-AS1	FOXP1 antisense RNA 1 [Source:HGNC Symbol;Acc:HGNC:41942]	3:71289769-71305853	0	0	0	0	0	0	0	0	0	0	0	0	0	0	0	0	0	0
ENSG00000188596	CFAP54	cilia and flagella associated 54 [Source:HGNC Symbol;Acc:HGNC:26456]	12:96489571-96875555	0	0	0	0	0.00874492	0.0101627	0.00345776	0.00697425	0	0	0	0	0	3	3	1	2	0
ENSG00000188599	NPIPP1	nuclear pore complex interacting protein pseudogene 1 [Source:HGNC Symbol;Acc:HGNC:35407]	16:15104312-15123498	5.52974	4.08585	4.4124	5.07675	4.73207	4.67403	1.25268	6.36497	7.12256	237	200	197	236	233	198	52	262	293
ENSG00000176742	OR51V1	olfactory receptor family 51 subfamily V member 1 [Source:HGNC Symbol;Acc:HGNC:19597]	11:5199735-5200700	0	0	0	0	0	0	0	0	0	0	0	0	0	0	0	0	0	0
ENSG00000121335	PRB2	proline-rich protein BstNI subfamily 2 [Source:HGNC Symbol;Acc:HGNC:9338]	12:11391540-11501041	0	0	0	0	0	0	0	0	0	0	0	0	0	0	0	0	0	0
ENSG00000237230	KRTAP2-5P	keratin associated protein 2-5, pseudogene [Source:HGNC Symbol;Acc:HGNC:18920]	17:41071946-41072341	0	0	0	0	0	0	0	0	0	0	0	0	0	0	0	0	0	0
ENSG00000269800	PLEKHA3P1	pleckstrin homology domain containing A3 pseudogene 1 [Source:HGNC Symbol;Acc:HGNC:19648]	19:41521043-41521989	0.428438	0.328253	0.462688	0.246879	0.699251	1.08365	0.442322	0.223067	0.446395	8	7	9	5	15	20	8	4	8
ENSG00000269802	CTB-180A7.3	-	19:6343761-6362149	0	0	0	0	0	0	0	0	0	0	0	0	0	0	0	0	0	0
ENSG00000237233	TMEM26-AS1	TMEM26 antisense RNA 1 [Source:HGNC Symbol;Acc:HGNC:51209]	10:61452639-61481956	0	0	0	0	0	0	0	0	0	0	0	0	0	0	0	0	0	0
ENSG00000269807	AC007292.4	-	19:4347244-4354057	0	0	0	0	0	0	0	0	0	0	0	0	0	0	0	0	0	0
ENSG00000269806	GLTSCR1-AS1	GLTSCR1 antisense RNA 1 [Source:HGNC Symbol;Acc:HGNC:51588]	19:47615699-47626395	0	0	0	0	0	0	0	0	0	0	0	0	0	0	0	0	0	0
ENSG00000265319	RN7SL847P	RNA, 7SL, cytoplasmic 847, pseudogene [Source:HGNC Symbol;Acc:HGNC:46863]	10:33034655-33034924	0	0	0	0	0	0	0	0	0	0	0	0	0	0	0	0	0	0
ENSG00000167914	GSDMA	gasdermin A [Source:HGNC Symbol;Acc:HGNC:13311]	17:39962973-39977766	0	0.0362288	0	0	0	0.0209299	0	0.0215451	0	0	2	0	0	0	1	0	1	0
ENSG00000240199	RN7SL520P	RNA, 7SL, cytoplasmic 520, pseudogene [Source:HGNC Symbol;Acc:HGNC:46536]	16:75698531-75698816	0	0	0	0	0	0	0	0	0	0	0	0	0	0	0	0	0	0
ENSG00000265313	LINC01476	long intergenic non-protein coding RNA 1476 [Source:HGNC Symbol;Acc:HGNC:51117]	17:59430869-59526946	0	0	0	0	0	0	0	0	0	0	0	0	0	0	0	0	0	0
ENSG00000265315	RN7SL199P	RNA, 7SL, cytoplasmic 199, pseudogene [Source:HGNC Symbol;Acc:HGNC:46215]	17:46537534-46537814	0	0	0	0	0	0	0	0	0	0	0	0	0	0	0	0	0	0
ENSG00000265316	RP11-286N3.1	-	18:5463627-5480975	0	0	0	0	0	0	0	0	0	0	0	0	0	0	0	0	0	0
ENSG00000263257	RP11-65J21.4	-	16:14408039-14418872	0	0	0	0	0	0	0	0	0	0	0	0	0	0	0	0	0	0
ENSG00000263252	RP11-146P2.1	-	17:53353427-53354134	0	0	0	0	0	0	0	0	0	0	0	0	0	0	0	0	0	0
ENSG00000263253	RP11-204E4.3	-	16:20208925-20209525	0	0	0	0	0	0	0	0	0	0	0	0	0	0	0	0	0	0
ENSG00000251125	CTD-2335O3.3	-	5:51451158-51462089	0	0	0	0	0	0	0	0	0	0	0	0	0	0	0	0	0	0
ENSG00000251127	RP11-280G9.1	-	8:61759094-61765969	0	0.0762122	0	0	0.0303144	0	0.0359532	0	0	0	5	0	0	2	0	2	0	0
ENSG00000251126	RP11-119H12.6	-	4:112880298-112882330	0	0	0	0	0	0	0	0	0	0	0	0	0	0	0	0	0	0
ENSG00000215367	TMED11P	transmembrane p24 trafficking protein 11, pseudogene [Source:HGNC Symbol;Acc:HGNC:35401]	4:1115197-1153726	0	0	0	0	0	0	0	0	0	0	0	0	0	0	0	0	0	0
ENSG00000215365	FAM90A22P	family with sequence similarity 90 member A22, pseudogene [Source:HGNC Symbol;Acc:HGNC:32270]	8:7571995-7575006	0	0	0	0	0	0	0	0	0	0	0	0	0	0	0	0	0	0
ENSG00000251122	NIFKP2	nucleolar protein interacting with the FHA domain of MKI67 pseudogene 2 [Source:HGNC Symbol;Acc:HGNC:44950]	5:174923090-174923945	0	0	0	0	0	0	0	0	0	0	0	0	0	0	0	0	0	0
ENSG00000215369	RPL37P3	ribosomal protein L37 pseudogene 3 [Source:HGNC Symbol;Acc:HGNC:17238]	21:17894193-17894485	0	0	0	0	0	0	0	0	0.851165	0	0	0	0	0	0	0	0	5
ENSG00000215368	BOD1P2	biorientation of chromosomes in cell division 1 pseudogene 2 [Source:HGNC Symbol;Acc:HGNC:51436]	18:5132749-5133229	0	0	0	0	0	0	0	0	0	0	0	0	0	0	0	0	0	0
ENSG00000251129	RP11-734I18.1	-	4:31997397-32155406	32.4186	42.3206	43.8943	40.2328	35.8834	33.8552	39.1285	36.2675	31.941	497	741	701	669	632	513	581	534	470
ENSG00000251128	WWC2-AS1	WWC2 antisense RNA 1 [Source:HGNC Symbol;Acc:HGNC:41041]	4:183233628-183240634	0	0	0	0	0	0	0	0	0	0	0	0	0	0	0	0	0	0
ENSG00000119760	SUPT7L	SPT7-like STAGA complex gamma subunit [Source:HGNC Symbol;Acc:HGNC:30632]	2:27650812-27663840	6.75597	6.08354	6.90614	7.29115	6.60075	7.83667	6.96519	6.58833	7.3723	1372	1411	1461	1606	1540	1573	1370	1285	1437
ENSG00000259352	RP11-109D20.2	-	15:45073492-45074048	0	0	0	0	0	0	0	0	0	0	0	0	0	0	0	0	0	0
ENSG00000259353	RP11-30K9.5	-	15:58856831-58865063	0	0	0.1021	0	0	0	0	0.11079	0	0	0	1	0	0	0	0	1	0
ENSG00000259350	RP11-63A23.2	-	15:88952683-88953460	0	0	0	0	0	0	0	0	0	0	0	0	0	0	0	0	0	0
ENSG00000259351	RP11-111E14.1	-	15:63928274-63935953	0	0	0	0	0	0	0	0	0	0	0	0	0	0	0	0	0	0
ENSG00000259356	RP11-90E5.1	-	15:100126106-100129743	0	0	0	0	0	0	0	0	0	0	0	0	0	0	0	0	0	0
ENSG00000197779	ZNF81	zinc finger protein 81 [Source:HGNC Symbol;Acc:HGNC:13156]	X:47836902-48002561	0.929723	1.24716	1.31872	1.21433	1.23984	1.10043	1.22143	1.35587	1.2729	312	478	461	442	478	365	397	437	410
ENSG00000259354	RP11-519G16.3	-	15:45448427-45513767	0	0	0	0	0	0	0	0	0	0	0	0	0	0	0	0	0	0
ENSG00000019991	HGF	hepatocyte growth factor (hepapoietin A; scatter factor) [Source:HGNC Symbol;Acc:HGNC:4893]	7:81699006-81770438	0	0	0	0	0	0	0	0	0	0	0	0	0	0	0	0	0	0
ENSG00000259358	RP11-456J20.1	-	15:31765743-31768201	0.0194632	0.0340925	0.056072	0.0179476	0.0508443	0	0	0.0202747	0.0608519	1	2	3	1	3	0	0	1	3
ENSG00000259359	RP11-327J17.2	-	15:96171581-96174339	0	0	0	0	0	0	0	0	0.100057	0	0	0	0	0	0	0	0	2
ENSG00000240197	AC010518.3	-	19:54294049-54294366	0	0	0	0	0	0	0	0	0	0	0	0	0	0	0	0	0	0
ENSG00000198798	MAGEB3	MAGE family member B3 [Source:HGNC Symbol;Acc:HGNC:6810]	X:30230436-30237492	0.0139371	0	0.0401517	0.0385682	0.0970928	0.0564287	0.0863756	0.159685	0.0726242	1	0	3	3	8	4	6	11	5
ENSG00000175329	ISX	intestine-specific homeobox [Source:HGNC Symbol;Acc:HGNC:28084]	22:35066136-35087387	0.0385562	0.0607653	0	0.00710794	0.0469824	0.0546097	0.0398097	0.0321182	0.0160664	5	9	0	1	7	7	5	4	2
ENSG00000277655	RP11-640M9.4	-	1:146459449-146461859	0	0	0	0	0	0	0	0	0	0	0	0	0	0	0	0	0	0
ENSG00000147059	SPIN2A	spindlin family member 2A [Source:HGNC Symbol;Acc:HGNC:20694]	X:57134530-57137625	0.201459	0.14994	0.174056	0.148593	0.122749	0.173256	0.208008	0.283189	0.209903	20	17	18	16	14	17	20	27	20
ENSG00000198799	LRIG2	leucine-rich repeats and immunoglobulin-like domains 2 [Source:HGNC Symbol;Acc:HGNC:20889]	1:113073209-113132260	3.4566	3.6675	3.57973	3.15897	3.33456	3.90927	3.36426	3.18642	3.44362	1256	1522	1355	1245	1392	1404	1184	1112	1201
ENSG00000135776	ABCB10	ATP binding cassette subfamily B member 10 [Source:HGNC Symbol;Acc:HGNC:41]	1:229516582-229558695	27.2248	25.8108	27.4164	30.2951	27.6128	32.5073	34.7181	32.8921	31.6204	2875	3113	3016	3470	3350	3393	3551	3336	3205
ENSG00000135775	COG2	component of oligomeric golgi complex 2 [Source:HGNC Symbol;Acc:HGNC:6546]	1:230642489-230693982	3.78449	3.67517	3.84261	3.57414	3.67142	3.76678	3.90387	3.64554	3.76517	1109	1230	1173	1136	1236	1091	1108	1026	1059
ENSG00000139428	MMAB	methylmalonic aciduria (cobalamin deficiency) cblB type [Source:HGNC Symbol;Acc:HGNC:19331]	12:109553737-109573874	1.88487	2.02049	1.72824	2.14588	2.12118	2.04286	2.39794	2.02469	2.23841	379	464	362	468	490	406	467	391	432
ENSG00000135773	CAPN9	calpain 9 [Source:HGNC Symbol;Acc:HGNC:1486]	1:230747384-230802003	0	0	0	0	0	0	0	0	0	0	0	0	0	0	0	0	0	0
ENSG00000147050	KDM6A	lysine (K)-specific demethylase 6A [Source:HGNC Symbol;Acc:HGNC:12637]	X:44873177-45112602	5.00501	5.65829	6.06367	6.02526	6.95703	6.31244	7.21763	6.43466	6.83254	1099	1419	1387	1435	1755	1370	1535	1357	1440
ENSG00000152990	ADGRA3	adhesion G protein-coupled receptor A3 [Source:HGNC Symbol;Acc:HGNC:13839]	4:22345071-22516054	0.0167809	0.0176323	0.0225506	0.0587905	0.0321353	0.0271627	0.031184	0.0419329	0.0314703	5	6	7	19	11	8	9	12	9
ENSG00000197774	EME2	essential meiotic structure-specific endonuclease subunit 2 [Source:HGNC Symbol;Acc:HGNC:27289]	16:1773207-1781708	1.66447	1.90381	1.90929	2.33102	2.45016	2.70295	1.32261	2.27712	2.24343	395	516	472	600	668	634	304	519	511
ENSG00000132749	MTL5	metallothionein-like 5, testis-specific (tesmin) [Source:HGNC Symbol;Acc:HGNC:7446]	11:68707440-68751564	2.51352	2.16225	2.49206	3.03745	2.34107	2.58198	2.39638	2.23341	2.52133	457	449	472	599	489	464	422	390	440
ENSG00000226339	RPS26P56	ribosomal protein S26 pseudogene 56 [Source:HGNC Symbol;Acc:HGNC:35858]	X:129408382-129408621	0	0	0	0	0	0	0	0	0	0	0	0	0	0	0	0	0	0
ENSG00000226336	MRPS16P3	mitochondrial ribosomal protein S16 pseudogene 3 [Source:HGNC Symbol;Acc:HGNC:29733]	22:35703803-35704176	0	0	0	0	0	0	0	0	0	0	0	0	0	0	0	0	0	0
ENSG00000132746	ALDH3B2	aldehyde dehydrogenase 3 family member B2 [Source:HGNC Symbol;Acc:HGNC:411]	11:67662162-67681200	0	0	0	0	0	0	0	0	0	0	0	0	0	0	0	0	0	0
ENSG00000165644	COMTD1	catechol-O-methyltransferase domain containing 1 [Source:HGNC Symbol;Acc:HGNC:26309]	10:75233969-75236030	3.65612	3.46254	3.41422	3.49696	3.23656	3.71163	3.91609	3.28886	3.97762	294	318	286	305	299	295	305	254	307
ENSG00000132744	ACY3	aminoacylase 3 [Source:HGNC Symbol;Acc:HGNC:24104]	11:67642555-67650659	0	0	0	0	0	0	0	0	0	0	0	0	0	0	0	0	0	0
ENSG00000226332	RP11-157P1.4	-	20:62305432-62306325	0.913978	0.369371	0.809874	0.842676	0.611953	1.35147	0.653262	0.878436	0.219728	13	6	12	13	10	19	9	12	3
ENSG00000165643	SOHLH1	spermatogenesis and oogenesis specific basic helix-loop-helix 1 [Source:HGNC Symbol;Acc:HGNC:27845]	9:135693407-135699528	0.0388984	0	0	0	0	0.0196717	0	0	0.081037	2	0	0	0	0	1	0	0	4
ENSG00000226330	RP11-739N20.2	-	1:204377850-204435846	0	0	0	0	0	0	0	0	0	0	0	0	0	0	0	0	0	0
ENSG00000132740	IGHMBP2	immunoglobulin mu binding protein 2 [Source:HGNC Symbol;Acc:HGNC:5542]	11:68903842-68940602	3.09133	2.961	2.99809	3.3343	3.42153	2.97869	3.19582	2.88732	3.36583	777	850	785	909	988	740	778	697	812
ENSG00000153029	MR1	major histocompatibility complex, class I-related [Source:HGNC Symbol;Acc:HGNC:4975]	1:181033425-181061938	0.841358	1.09629	1.66893	1.21319	1.22522	1.29098	1.17746	2.12573	1.05938	211	314	436	330	353	320	286	512	255
ENSG00000231420	AC113610.1	-	2:150234892-150257007	0	0	0	0	0	0	0	0	0	0	0	0	0	0	0	0	0	0
ENSG00000165623	UCMA	upper zone of growth plate and cartilage matrix associated [Source:HGNC Symbol;Acc:HGNC:25205]	10:13221767-13234334	0	0	0	0	0	0	0	0	0	0	0	0	0	0	0	0	0	0
ENSG00000245156	RP11-867G23.3	-	11:66269832-66278525	0	0	0	0	0	0	0	0	0.0178647	0	0	0	0	0	0	0	0	1
ENSG00000266754	RN7SL524P	RNA, 7SL, cytoplasmic 524, pseudogene [Source:HGNC Symbol;Acc:HGNC:46540]	10:103974515-103974814	0	0	0	0	0	0	0	0	0	0	0	0	0	0	0	0	0	0
ENSG00000249754	NDUFB4P9	NADH:ubiquinone oxidoreductase subunit B4 pseudogene 9 [Source:HGNC Symbol;Acc:HGNC:45257]	4:140314163-140314550	0	0	0	0	0	0	0	0	0	0	0	0	0	0	0	0	0	0
ENSG00000187026	KRTAP21-2	keratin associated protein 21-2 [Source:HGNC Symbol;Acc:HGNC:18946]	21:30746794-30747233	0	0	0	0	0	0	0	0	0	0	0	0	0	0	0	0	0	0
ENSG00000187024	PTRH1	peptidyl-tRNA hydrolase 1 homolog [Source:HGNC Symbol;Acc:HGNC:27039]	9:127692978-127724873	0.834606	0.825822	0.723022	0.688153	0.756006	0.748292	0.609496	0.770088	0.742294	123	139	111	110	128	109	87	109	105
ENSG00000142039	CCDC97	coiled-coil domain containing 97 [Source:HGNC Symbol;Acc:HGNC:28289]	19:41310189-41324883	4.87862	4.25198	4.79093	5.41821	5.91588	5.18554	4.96757	5.00961	4.9076	435	433	445	524	606	457	429	429	420
ENSG00000187021	PNLIPRP1	pancreatic lipase-related protein 1 [Source:HGNC Symbol;Acc:HGNC:9156]	10:116590385-116609175	0	0	0	0	0	0	0	0	0	0	0	0	0	0	0	0	0	0
ENSG00000162148	PPP1R32	protein phosphatase 1 regulatory subunit 32 [Source:HGNC Symbol;Acc:HGNC:28869]	11:61481120-61490931	0.538492	0.52696	0.486519	0.423461	0.30329	0.480714	0.0981191	0.379284	0.26401	34	38	32	29	22	30	6	23	16
ENSG00000188629	ZNF177	zinc finger protein 177 [Source:HGNC Symbol;Acc:HGNC:12966]	19:9363020-9382617	0.21796	0	0.0464912	0.100477	0	0.245013	0.15002	0.138685	0.0126146	18	0	4	9	0	20	12	11	1
ENSG00000180035	ZNF48	zinc finger protein 48 [Source:HGNC Symbol;Acc:HGNC:13114]	16:30378106-30400108	0.514362	0.386781	1.26055	1.869	1.81195	1.67752	0.893434	0.472549	1.4942	85	73	217	335	344	274	143	75	237
ENSG00000188624	IGFL3	IGF like family member 3 [Source:HGNC Symbol;Acc:HGNC:32930]	19:46120071-46124674	0	0	0	0	0	0	0	0	0	0	0	0	0	0	0	0	0	0
ENSG00000188626	GOLGA8M	golgin A8 family member M [Source:HGNC Symbol;Acc:HGNC:44404]	15:28701954-28738384	0.108717	0.0571072	0.0626163	0.0400847	0.151415	0.0880001	0.067351	0.045282	0.0679541	5	3	3	2	8	4	3	2	3
ENSG00000066855	MTFR1	mitochondrial fission regulator 1 [Source:HGNC Symbol;Acc:HGNC:29510]	8:65644734-65771261	4.92452	4.14312	4.62357	4.54892	3.91838	4.62578	4.8176	4.89261	3.94593	1048	1007	1025	1050	958	973	993	1000	806
ENSG00000188620	HMX3	H6 family homeobox 3 [Source:HGNC Symbol;Acc:HGNC:5019]	10:123135962-123137741	13.1837	12.2224	11.6371	13.3592	13.5363	13.0082	10.9148	11.8996	11.5669	323	342	297	355	381	315	259	280	272
ENSG00000281889	AC073072.1	-	7:22798447-22798979	0	0	0	0	0	0	0	0	0	0	0	0	0	0	0	0	0	0
ENSG00000161681	SHANK1	SH3 and multiple ankyrin repeat domains 1 [Source:HGNC Symbol;Acc:HGNC:15474]	19:50661827-50719450	0.0947214	0.0791667	0.0330664	0.0476336	0.0674601	0.0261367	0.0444521	0.0358627	0.0224273	22	21	8	12	18	6	10	8	5
ENSG00000185774	KCNIP4	Kv channel interacting protein 4 [Source:HGNC Symbol;Acc:HGNC:30083]	4:20728616-21948799	0	0	0	0	0	0	0	0	0	0	0	0	0	0	0	0	0	0
ENSG00000185775	SPATA31A6	SPATA31 subfamily A, member 6 [Source:HGNC Symbol;Acc:HGNC:32006]	9:42183659-42189882	0.126585	0.187564	0.149553	0.206484	0.220365	0.118218	0.201071	0.152081	0.0811627	13	22	16	23	26	12	20	15	8
ENSG00000090054	SPTLC1	serine palmitoyltransferase, long chain base subunit 1 [Source:HGNC Symbol;Acc:HGNC:11277]	9:92031999-92115384	18.8536	19.2329	19.5874	16.614	17.5956	19.0109	20.1303	18.8945	18.7636	1787	2082	1934	1708	1916	1781	1848	1720	1707
ENSG00000101096	NFATC2	nuclear factor of activated T-cells, cytoplasmic, calcineurin-dependent 2 [Source:HGNC Symbol;Acc:HGNC:7776]	20:51386957-51562831	2.93551	3.34587	3.3785	3.82712	4.1284	3.67731	4.28582	3.83404	3.8406	739	962	886	1045	1194	915	1045	927	928
ENSG00000213177	PRDX2P4	peroxiredoxin 2 pseudogene 4 [Source:HGNC Symbol;Acc:HGNC:44969]	6:100136064-100136663	0.0797667	0	0.0765751	0	0	0	0	0	0.0831305	1	0	1	0	0	0	0	0	1
ENSG00000101098	RIMS4	regulating synaptic membrane exocytosis 4 [Source:HGNC Symbol;Acc:HGNC:16183]	20:44751808-44810338	0	0.00712384	0	0	0	0	0	0	0	0	1	0	0	0	0	0	0	0
ENSG00000250654	RP11-834C11.7	-	12:54076838-54081903	0.078571	0.0458607	0.100561	0.0965954	0	0.132499	0.0270436	0.0818196	0.0272857	3	2	4	4	0	5	1	3	1
ENSG00000213401	MAGEA12	MAGE family member A12 [Source:HGNC Symbol;Acc:HGNC:6799]	X:152733779-152737669	9.36591	8.22444	8.87326	10.1286	8.91083	8.77345	9.83872	9.69519	8.439	688	690	679	807	752	637	700	684	595
ENSG00000213402	PTPRCAP	protein tyrosine phosphatase, receptor type, C-associated protein [Source:HGNC Symbol;Acc:HGNC:9667]	11:67435510-67438067	0	0	0	0	0	0	0	0	0.154422	0	0	0	0	0	0	0	0	4
ENSG00000250657	RP11-1E6.1	-	4:43340875-43345600	0	0	0	0	0	0	0	0	0	0	0	0	0	0	0	0	0	0
ENSG00000250651	PABPC1P7	poly(A) binding protein, cytoplasmic 1 pseudogene 7 [Source:HGNC Symbol;Acc:HGNC:37987]	4:102896725-102898237	0	0	0	0	0	0	0	0	0	0	0	0	0	0	0	0	0	0
ENSG00000257604	RP11-359M6.2	-	12:79500119-79500687	0	0	0	0	0	0	0	0	0	0	0	0	0	0	0	0	0	0
ENSG00000257605	RP11-680A11.5	-	12:53298655-53300314	0.148018	0	0	0	0.257632	0	0	0	0	2	0	0	0	4	0	0	0	0
ENSG00000213409	C1QBPP2	complement component 1, q subcomponent binding protein, pseudogene 2 [Source:HGNC Symbol;Acc:HGNC:51618]	11:66761575-66762399	0	0	0	0	0	0	0	0	0	0	0	0	0	0	0	0	0	0
ENSG00000112715	VEGFA	vascular endothelial growth factor A [Source:HGNC Symbol;Acc:HGNC:12680]	6:43770184-43786487	6.5128	7.54593	6.43574	6.62621	7.30051	7.61334	7.33494	6.92662	7.33521	3777	4998	3888	4168	4864	4364	4120	3858	4083
ENSG00000250658	RP11-138B4.1	-	4:187304083-187309682	0.0226395	0.0198281	0.0652228	0.0417533	0.0197075	0.137483	0.0935396	0.0471669	0	1	1	3	2	1	6	4	2	0
ENSG00000271656	RP11-114N19.5	-	14:81003325-81003645	0	0	0	0	0	0	0	0	0	0	0	0	0	0	0	0	0	0
ENSG00000258401	RP11-326E7.1	-	14:49373966-49374383	0	0	0	0	0.099669	0	0	0	0	0	0	0	0	1	0	0	0	0
ENSG00000258400	RP11-831F12.2	-	14:49707667-49708792	0	0	0	0	0	0	0	0	0	0	0	0	0	0	0	0	0	0
ENSG00000147003	TMEM27	transmembrane protein 27 [Source:HGNC Symbol;Acc:HGNC:29437]	X:15627318-15665031	0.333746	0.371911	0.349508	0.223798	0.475385	0.798114	0.313249	0.600223	0.663843	11	14	12	8	18	26	10	19	21
ENSG00000258405	ZNF578	zinc finger protein 578 [Source:HGNC Symbol;Acc:HGNC:26449]	19:52453576-52512154	0.0565866	0.0765732	0.0444443	0.0521707	0.0403007	0.0728638	0.0796696	0.0482055	0.0589569	11	17	9	11	9	14	15	9	11
ENSG00000258404	RP11-1029J19.5	-	14:101634454-101731108	0.527303	0.184655	0.607405	0.0972097	0.0917657	0.106678	0.217778	0	0.109864	5	2	6	1	1	1	2	0	1
ENSG00000258407	RP11-300J18.2	-	14:88010787-88015611	0	0	0.138807	0	0	0	0	0	0	0	0	1	0	0	0	0	0	0
ENSG00000258406	RP11-88E18.1	-	14:43274824-43275697	0	0	0	0	0	0	0	0	0	0	0	0	0	0	0	0	0	0
ENSG00000185304	RGPD2	RANBP2-like and GRIP domain containing 2 [Source:HGNC Symbol;Acc:HGNC:32415]	2:87755955-87825952	3.66532	3.67648	3.25633	3.34417	3.47796	3.68264	3.56791	3.55841	3.67317	577	661	534	571	629	573	544	538	555
ENSG00000258408	NT5CP2	5',3'-nucleotidase, cytosolic pseudogene 2 [Source:HGNC Symbol;Acc:HGNC:20047]	14:73539221-73539781	0	0	0	0	0	0	0	0	0	0	0	0	0	0	0	0	0	0
ENSG00000179428	AC073072.5	-	7:22725395-22727620	0.245721	0.122923	0.101086	0.323621	0.183323	0.0355072	0.0724863	0.29237	0.182838	7	4	3	10	6	1	2	8	5
ENSG00000090581	GNPTG	N-acetylglucosamine-1-phosphate transferase, gamma subunit [Source:HGNC Symbol;Acc:HGNC:23026]	16:1351923-1364113	2.75827	2.60575	2.13916	2.77058	2.89373	2.53362	3.07267	2.81904	2.79056	380	410	307	414	458	345	410	373	369
ENSG00000229913	RP11-378I13.1	-	1:56823679-56826920	0	0	0	0	0	0	0	0	0	0	0	0	0	0	0	0	0	0
ENSG00000138468	SENP7	SUMO1/sentrin specific peptidase 7 [Source:HGNC Symbol;Acc:HGNC:30402]	3:101324205-101513241	4.32958	5.01698	5.2582	4.3339	4.7851	5.15137	5.47661	4.98199	4.94905	875	1158	1107	950	1111	1029	1072	967	960
ENSG00000250389	MTND6P2	mitochondrially encoded NADH:ubiquinone oxidoreductase core subunit 6 pseudogene 2 [Source:HGNC Symbol;Acc:HGNC:39465]	5:8618581-8619104	0	0	0	0	0	0	0	0	0	0	0	0	0	0	0	0	0	0
ENSG00000250386	RP11-432M8.11	-	5:17625551-17625959	0	0	0	0	0	0	0	0	0	0	0	0	0	0	0	0	0	0
ENSG00000250387	RP11-136K7.2	-	5:71351855-71446342	0	0	0	0	0	0	0	0	0	0	0	0	0	0	0	0	0	0
ENSG00000164597	COG5	component of oligomeric golgi complex 5 [Source:HGNC Symbol;Acc:HGNC:14857]	7:107201555-107564514	14.1092	14.9621	15.93	14.52	14.5268	14.4877	15.7019	14.9141	13.9486	3287	3981	3866	3669	3888	3336	3543	3337	3119
ENSG00000233070	ZFY-AS1	ZFY antisense RNA 1 [Source:HGNC Symbol;Acc:HGNC:38798]	Y:2966844-3002626	0	0	0	0	0	0	0	0	0	0	0	0	0	0	0	0	0	0
ENSG00000164591	MYOZ3	myozenin 3 [Source:HGNC Symbol;Acc:HGNC:18565]	5:150660874-150679365	0	0	0.00830047	0.00398458	0.0150495	0	0	0	0.0135098	0	0	2	1	4	0	0	0	3
ENSG00000250383	CTD-2197I11.1	-	5:108818041-108830790	0	0	0	0	0	0	0	0	0.125322	0	0	0	0	0	0	0	0	1
ENSG00000148143	ZNF462	zinc finger protein 462 [Source:HGNC Symbol;Acc:HGNC:21684]	9:106863097-107013634	0	0	0	0	0.00197767	0	0	0	0	0	0	0	0	1	0	0	0	0
ENSG00000267407	CTD-2050I18.1	-	19:31542039-31554797	0	0	0	0	0	0	0	0	0	0	0	0	0	0	0	0	0	0
ENSG00000267406	CTD-2189E23.2	-	19:14267807-14269377	0	0	0	0	0	0	0	0	0	0	0	0	0	0	0	0	0	0
ENSG00000267405	CTC-296K1.4	-	17:44794747-44797783	0	0	0	0	0	0	0	0	0	0	0	0	0	0	0	0	0	0
ENSG00000267404	RP11-49I11.2	-	18:36273574-36274599	0	0.0408545	0	0.215117	0	0.0472045	0	0	0	0	1	0	5	0	1	0	0	0
ENSG00000267402	TCF4-AS2	TCF4 antisense RNA 2 [Source:HGNC Symbol;Acc:HGNC:51643]	18:55492175-55496392	0	0	0	0	0	0	0	0	0	0	0	0	0	0	0	0	0	0
ENSG00000267401	RP11-396N11.1	-	18:60294151-60301118	0	0	0	0	0	0	0	0	0	0	0	0	0	0	0	0	0	0
ENSG00000267400	RP11-325K19.3	-	18:60495868-60496336	0	0	0	0	0	0	0	0	0	0	0	0	0	0	0	0	0	0
ENSG00000104112	SCG3	secretogranin III [Source:HGNC Symbol;Acc:HGNC:13707]	15:51681353-51721031	11.4344	11.0347	12.6141	5.64284	5.41745	5.98308	5.35848	5.04859	5.18103	1106	1219	1271	592	602	572	502	469	481
ENSG00000267409	RP11-567M16.2	-	18:79610747-79612303	0	0	0.235694	0	0.0712165	0	0.0845054	0	0	0	0	3	0	1	0	1	0	0
ENSG00000267408	CTB-50L17.2	-	19:4621194-4622307	0	0	0	0	0	0	0	0	0	0	0	0	0	0	0	0	0	0
ENSG00000223908	AC068657.2	-	5:160023740-160024045	0.156405	0.136983	0	0.288452	0.272433	0.158274	0.161554	0	0.163001	1	1	0	2	2	1	1	0	1
ENSG00000223903	RPL23P4	ribosomal protein L23 pseudogene 4 [Source:HGNC Symbol;Acc:HGNC:36678]	2:219697799-219698214	0	0.100761	0.110445	0	0	0	0	0	0	0	1	1	0	0	0	0	0	0
ENSG00000223901	AP001469.5	-	21:46220269-46225364	0	0	0	0	0	0	0	0	0	0	0	0	0	0	0	0	0	0
ENSG00000011677	GABRA3	gamma-aminobutyric acid (GABA) A receptor, alpha 3 [Source:HGNC Symbol;Acc:HGNC:4077]	X:152166234-152451358	0.595822	0.468634	0.639819	0.688992	0.536204	0.561947	0.437914	0.4942	0.420857	59	53	66	74	61	55	42	47	40
ENSG00000223907	LINC01226	long intergenic non-protein coding RNA 1226 [Source:HGNC Symbol;Acc:HGNC:49678]	1:31518435-31524245	0	0.0108508	0	0	0.0107848	0	0.0127972	0.0258118	0.0258236	0	1	0	0	1	0	1	2	2
ENSG00000223904	HMGB1P12	high mobility group box 1 pseudogene 12 [Source:HGNC Symbol;Acc:HGNC:13317]	X:111434427-111435024	0	0	0	0	0	0	0	0	0	0	0	0	0	0	0	0	0	0
ENSG00000223905	RP11-335E14.1	-	1:76353583-76354246	0	0	0	0	0	0	0	0	0	0	0	0	0	0	0	0	0	0
ENSG00000158691	ZSCAN12	zinc finger and SCAN domain containing 12 [Source:HGNC Symbol;Acc:HGNC:13172]	6:28378955-28399734	4.82411	5.54592	6.01421	5.24481	5.19162	5.78084	5.49178	5.65568	6.16185	770	1011	1000	908	952	912	849	867	944
ENSG00000218208	RP11-367G18.2	-	6:113581501-113581947	0.214246	0.28132	0.102785	0.098732	0.186498	0.325046	0.110594	0.223067	0.223169	2	3	1	1	2	3	1	2	2
ENSG00000125285	SOX21	SRY-box 21 [Source:HGNC Symbol;Acc:HGNC:11197]	13:94709622-94712399	0	0	0	0	0	0	0	0	0	0	0	0	0	0	0	0	0	0
ENSG00000242318	RP11-810D13.1	-	4:98409290-98409763	0	0	0	0	0	0	0	0	0	0	0	0	0	0	0	0	0	0
ENSG00000181852	RNF41	ring finger protein 41, E3 ubiquitin protein ligase [Source:HGNC Symbol;Acc:HGNC:18401]	12:56202175-56221933	3.36658	3.6148	3.28491	3.20295	3.35269	3.54117	3.43893	3.6172	3.89424	1034	1268	1051	1067	1183	1075	1023	1067	1148
ENSG00000242317	RP11-875H7.5	-	3:55493830-55505261	0	0	0	0	0	0	0	0	0	0	0	0	0	0	0	0	0	0
ENSG00000242314	RPL12P32	ribosomal protein L12 pseudogene 32 [Source:HGNC Symbol;Acc:HGNC:36597]	12:31948334-31948827	0	0	0	0	0	0	0	0	0	0	0	0	0	0	0	0	0	0
ENSG00000184828	ZBTB7C	zinc finger and BTB domain containing 7C [Source:HGNC Symbol;Acc:HGNC:31700]	18:48026673-48410752	0	0	0	0	0	0	0.00537987	0	0	0	0	0	0	0	0	1	0	0
ENSG00000155070	UNC93B2	unc-93 homolog B2 pseudogene (C. elegans) [Source:HGNC Symbol;Acc:HGNC:13482]	7:6855485-6859830	0	0	0	0	0	0	0	0	0	0	0	0	0	0	0	0	0	0
ENSG00000168930	TRIM49	tripartite motif containing 49 [Source:HGNC Symbol;Acc:HGNC:13431]	11:89797655-89808575	0	0	0	0	0	0	0	0	0	0	0	0	0	0	0	0	0	0
ENSG00000168936	TMEM129	transmembrane protein 129 [Source:HGNC Symbol;Acc:HGNC:25137]	4:1715952-1721358	3.12747	4.06724	3.94411	4.36283	2.97582	3.82598	3.17098	2.6072	3.65771	612	909	804	926	669	740	601	490	687
ENSG00000168939	SPRY3	sprouty RTK signaling antagonist 3 [Source:HGNC Symbol;Acc:HGNC:11271]	X:155767812-155782459	0.0902436	0.0790184	0.0764392	0.127251	0.0600694	0.0537106	0.0767324	0.0718561	0.0497788	17	17	15	26	13	10	14	13	9
ENSG00000168938	PPIC	peptidylprolyl isomerase C (cyclophilin C) [Source:HGNC Symbol;Acc:HGNC:9256]	5:123023250-123036741	4.49743	4.96803	4.99136	5.16126	4.80673	4.74224	6.19131	5.61143	5.57542	237	299	274	295	291	247	316	284	282
ENSG00000197506	SLC28A3	solute carrier family 28 (concentrative nucleoside transporter), member 3 [Source:HGNC Symbol;Acc:HGNC:16484]	9:84275457-84340683	0	0	0	0	0	0.0092799	0	0	0	0	0	0	0	0	1	0	0	0
ENSG00000256551	RP13-653N12.1	-	12:128086985-128118132	0	0	0	0	0	0	0	0	0	0	0	0	0	0	0	0	0	0
ENSG00000186086	NBPF6	neuroblastoma breakpoint family member 6 [Source:HGNC Symbol;Acc:HGNC:31988]	1:108375799-108471002	1.26532	1.21509	1.04485	1.00351	1.11322	1.45912	1.13783	1.41662	1.09148	93	102	80	80	94	106	81	100	77
ENSG00000256553	TRAV1-2	T cell receptor alpha variable 1-2 [Source:HGNC Symbol;Acc:HGNC:12102]	14:21642889-21643578	0	0	0	0	0	0	0	0	0	0	0	0	0	0	0	0	0	0
ENSG00000256552	RP11-113C12.4	-	12:8320381-8369555	0	0	0.139415	0	0	0	0	0	0	0	0	3	0	0	0	0	0	0
ENSG00000186082	KRT18P14	keratin 18 pseudogene 14 [Source:HGNC Symbol;Acc:HGNC:6433]	11:35860249-35861498	0	0	0	0	0	0	0	0	0	0	0	0	0	0	0	0	0	0
ENSG00000186081	KRT5	keratin 5, type II [Source:HGNC Symbol;Acc:HGNC:6442]	12:52514575-52520687	0	0	0	0	0	0	0	0	0	0	0	0	0	0	0	0	0	0
ENSG00000126882	FAM78A	family with sequence similarity 78 member A [Source:HGNC Symbol;Acc:HGNC:25465]	9:131258076-131276547	50.6613	45.6502	45.9606	47.9772	47.2926	45.1054	42.0425	42.5496	43.3811	6625	6818	6261	6805	7105	5830	5325	5344	5445
ENSG00000186088	GSAP	gamma-secretase activating protein [Source:HGNC Symbol;Acc:HGNC:28042]	7:77310751-77416400	0	0	0	0.00698089	0	0	0.0117294	0.00394301	0	0	0	0	2	0	0	3	1	0
ENSG00000175322	ZNF519	zinc finger protein 519 [Source:HGNC Symbol;Acc:HGNC:30574]	18:14057457-14132490	0.558798	0.740949	0.681141	0.576352	0.582631	0.776861	0.529212	0.830883	0.705754	278	421	353	311	333	382	255	397	337
ENSG00000204929	AC074391.1	-	2:65436711-66084639	0.0430406	0	0	0.0595286	0.112408	0.152426	0.0888819	0.112049	0.0784892	4	0	0	6	12	14	8	10	7
ENSG00000204928	GRXCR2	glutaredoxin, cysteine rich 2 [Source:HGNC Symbol;Acc:HGNC:33862]	5:145859733-145872968	0	0	0	0	0	0	0	0	0	0	0	0	0	0	0	0	0	0
ENSG00000204923	FBXO48	F-box protein 48 [Source:HGNC Symbol;Acc:HGNC:33857]	2:68459419-68467258	1.36045	1.33916	1.38709	1.27767	1.4784	1.26529	1.44825	1.39892	1.55827	161	181	171	164	201	148	166	159	177
ENSG00000204922	UQCC3	ubiquinol-cytochrome c reductase complex assembly factor 3 [Source:HGNC Symbol;Acc:HGNC:34399]	11:62670273-62673687	3.69682	3.00919	2.81082	3.72105	3.27691	2.80232	2.77803	2.8133	3.03887	327	304	259	357	333	245	238	239	258
ENSG00000204920	ZNF155	zinc finger protein 155 [Source:HGNC Symbol;Acc:HGNC:12940]	19:43967862-43998325	0.176085	0.256962	0.135227	0.265166	0.0408749	0.0831364	0.218167	0.0794496	0.146767	30	50	24	49	8	14	36	13	24
ENSG00000261382	RP11-461L18.1	-	5:153901459-153903223	0	0	0	0	0	0	0	0	0	0	0	0	0	0	0	0	0	0
ENSG00000008441	NFIX	nuclear factor I/X (CCAAT-binding transcription factor) [Source:HGNC Symbol;Acc:HGNC:7788]	19:12995608-13098796	1.93732	2.75734	2.17489	3.10148	2.56829	2.2348	2.78694	3.09326	2.9812	478	777	559	830	728	545	666	733	706
ENSG00000182508	LHFPL1	lipoma HMGIC fusion partner-like 1 [Source:HGNC Symbol;Acc:HGNC:6587]	X:112630648-112680054	0	0	0	0	0	0	0	0	0	0	0	0	0	0	0	0	0	0
ENSG00000182504	CEP97	centrosomal protein 97kDa [Source:HGNC Symbol;Acc:HGNC:26244]	3:101723925-101770562	2.2298	2.41614	2.5103	2.15143	2.00217	2.01989	2.19896	2.08644	2.09161	602	745	706	630	621	539	575	541	542
ENSG00000128000	ZNF780B	zinc finger protein 780B [Source:HGNC Symbol;Acc:HGNC:33109]	19:40028260-40056209	0.588555	1.22961	0.700868	1.33253	0.823574	1.49243	1.56916	0.9037	1.70375	158	377	196	388	254	396	408	233	439
ENSG00000121542	SEC22A	SEC22 homolog A, vesicle trafficking protein [Source:HGNC Symbol;Acc:HGNC:20260]	3:123201927-123274130	2.42545	1.65795	2.056	1.66734	1.88897	1.93014	1.64751	1.99374	1.80288	342	267	302	255	306	269	225	270	244
ENSG00000264334	RP11-671C19.2	-	18:77983020-77986610	34.8754	52.0286	45.669	58.1462	56.3244	61.0417	67.0601	68.5133	59.6942	574	978	783	1038	1065	993	1069	1083	943
ENSG00000234864	AL022344.5	-	10:42696035-42706453	0	0	0	0	0	0	0	0	0	0	0	0	0	0	0	0	0	0
ENSG00000254050	RP11-577N1.1	-	8:62473217-62474269	0	0	0	0	0	0	0	0	0	0	0	0	0	0	0	0	0	0
ENSG00000124216	SNAI1	snail family zinc finger 1 [Source:HGNC Symbol;Acc:HGNC:11128]	20:49982999-49988886	13.6023	13.9239	13.1667	10.97	12.1366	11.9807	11.4052	11.3539	10.6806	479	560	483	419	491	417	389	384	361
ENSG00000234861	ATP5A1P5	ATP synthase, H+ transporting, mitochondrial F1 complex, alpha subunit 1 pseudogene 5 [Source:HGNC Symbol;Acc:HGNC:825]	9:42410830-42412150	0	0	0	0	0	0	0	0	0	0	0	0	0	0	0	0	0	0
ENSG00000214211	CTAGE14P	CTAGE family member 14, pseudogene [Source:HGNC Symbol;Acc:HGNC:37299]	2:167713663-167716065	0	0	0	0	0	0	0	0	0	0	0	0	0	0	0	0	0	0
ENSG00000104808	DHDH	dihydrodiol dehydrogenase (dimeric) [Source:HGNC Symbol;Acc:HGNC:17887]	19:48933682-48944969	1.3772	1.34772	0.80361	0.995869	1.22228	0.901576	0.864301	1.09654	0.759625	51	57	31	40	52	33	31	39	27
ENSG00000234369	TATDN1P1	TatD DNase domain containing 1 pseudogene 1 [Source:HGNC Symbol;Acc:HGNC:45058]	10:63222155-63223045	1.77324	1.74083	1.08324	0.99084	0.654801	1.30478	1.71987	0.951113	1.0077	33	37	21	20	14	24	31	17	18
ENSG00000254051	RP11-403D15.1	-	8:68176768-68177221	0	0	0	0	0	0	0	0	0	0	0	0	0	0	0	0	0	0
ENSG00000104805	NUCB1	nucleobindin 1 [Source:HGNC Symbol;Acc:HGNC:8043]	19:48900050-48923372	35.2781	24.9337	33.4675	33.8786	33.2335	34.3659	28.1174	27.3754	31.28	6297	5083	6223	6559	6815	6063	4861	4693	5359
ENSG00000104804	TULP2	tubby like protein 2 [Source:HGNC Symbol;Acc:HGNC:12424]	19:48880965-48898733	0.16145	0.218475	0.211344	0.189453	0.19164	0.133641	0.31824	0.183389	0.214085	11	17	15	14	15	9	21	12	14
ENSG00000247596	TWF2	twinfilin actin binding protein 2 [Source:HGNC Symbol;Acc:HGNC:9621]	3:52228610-52239260	22.2326	18.6896	18.6398	18.201	17.9561	17.6428	18.339	17.8902	17.6881	1303	1251	1138	1157	1209	1022	1041	1007	995
ENSG00000227447	XGY1	Xg pseudogene, Y-linked 1 [Source:HGNC Symbol;Acc:HGNC:12807]	Y:12440046-12507369	0	0	0	0	0	0	0	0	0	0	0	0	0	0	0	0	0	0
ENSG00000239345	HNRNPA1P26	heterogeneous nuclear ribonucleoprotein A1 pseudogene 26 [Source:HGNC Symbol;Acc:HGNC:39544]	X:100855288-100856379	0.0438278	0.0767705	0.0420742	0	0.0381517	0.0443515	0	0.0456552	0.0456761	1	2	1	0	1	1	0	1	1
ENSG00000239344	RP11-771F20.1	-	8:103768281-103769029	0	0.0559635	0	0.0589228	0	0	0.0660022	0	0.0665932	0	1	0	1	0	0	1	0	1
ENSG00000234362	AC104654.2	-	2:41931599-41933723	0	0	0.034313	0.0329598	0	0	0	0	0	0	0	1	1	0	0	0	0	0
ENSG00000237415	NRBF2P3	nuclear receptor binding factor 2 pseudogene 3 [Source:HGNC Symbol;Acc:HGNC:44606]	1:110848077-110848941	0.774889	1.06619	1.38148	1.47991	0.626319	0.952009	0.800057	0.633942	0.749674	14	22	26	29	13	17	14	11	13
ENSG00000237414	RP11-321L2.2	-	9:23894990-23898054	0	0	0	0	0	0	0	0	0	0	0	0	0	0	0	0	0	0
ENSG00000237417	XRCC6P1	X-ray repair complementing defective repair in Chinese hamster cells 6 pseudogene 1 [Source:HGNC Symbol;Acc:HGNC:45183]	10:93206857-93209627	0	0	0	0	0	0	0	0	0	0	0	0	0	0	0	0	0	0
ENSG00000106400	ZNHIT1	zinc finger, HIT-type containing 1 [Source:HGNC Symbol;Acc:HGNC:21688]	7:101217668-101224190	13.0389	11.6521	10.6356	11.3248	9.82779	9.44695	10.6786	11.2958	12.197	2036	2078	1730	1918	1763	1458	1615	1694	1828
ENSG00000237410	AP001092.4	-	11:64646399-64659681	0	0	0	0	0	0	0	0	0	0	0	0	0	0	0	0	0	0
ENSG00000177504	VCX2	variable charge, X-linked 2 [Source:HGNC Symbol;Acc:HGNC:18158]	X:8169944-8171267	0	0	0	0	0.0511186	0	0	0	0	0	0	0	0	1	0	0	0	0
ENSG00000106404	CLDN15	claudin 15 [Source:HGNC Symbol;Acc:HGNC:2036]	7:101232092-101238820	3.70122	3.75842	3.81101	4.4248	4.08393	4.07098	3.85312	4.38943	4.3602	482	559	517	625	611	524	486	549	545
ENSG00000280485	RP11-437J2.4	-	10:93772681-93788605	0	0	0	0	0	0	0	0	0	0	0	0	0	0	0	0	0	0
ENSG00000177508	IRX3	iroquois homeobox 3 [Source:HGNC Symbol;Acc:HGNC:14360]	16:54283304-54286763	0	0	0	0	0	0	0	0	0	0	0	0	0	0	0	0	0	0
ENSG00000237419	RP11-885N19.6	-	9:138199933-138203325	0	0	0	0	0	0	0	0	0	0	0	0	0	0	0	0	0	0
ENSG00000213234	ST13P10	suppression of tumorigenicity 13 (colon carcinoma) (Hsp70 interacting protein) pseudogene 10 [Source:HGNC Symbol;Acc:HGNC:38745]	11:112267290-112268371	0.0442329	0	0.0424631	0.0407885	0	0	0.0456891	0.0460771	0	1	0	1	1	0	0	1	1	0
ENSG00000179314	WSCD1	WSC domain containing 1 [Source:HGNC Symbol;Acc:HGNC:29060]	17:5772234-6124427	0.00520392	0	0	0.00239815	0	0.0078952	0.00268628	0	0	2	0	0	1	0	3	1	0	0
ENSG00000187840	EIF4EBP1	eukaryotic translation initiation factor 4E binding protein 1 [Source:HGNC Symbol;Acc:HGNC:3288]	8:38030341-38060365	125.607	110.682	100.959	124.856	114.926	110.513	95.7784	107.228	108.225	2815	2833	2357	3035	2959	2448	2079	2308	2328
ENSG00000249364	RP11-434D9.1	-	5:67379378-67805238	0	0	0	0	0	0	0	0	0	0	0	0	0	0	0	0	0	0
ENSG00000239504	RN7SL583P	RNA, 7SL, cytoplasmic 583, pseudogene [Source:HGNC Symbol;Acc:HGNC:46599]	1:88477828-88478114	0	0	0	0	0	0	0	0	0	0	0	0	0	0	0	0	0	0
ENSG00000187848	P2RX2	purinergic receptor P2X, ligand gated ion channel, 2 [Source:HGNC Symbol;Acc:HGNC:15459]	12:132618780-132622386	0	0	0	0	0	0	0	0	0	0	0	0	0	0	0	0	0	0
ENSG00000249365	RP11-508M8.1	-	5:125108204-125149929	0.212345	0	0.101874	0	0	0.107388	0	0	0.110595	2	0	1	0	0	1	0	0	1
ENSG00000123933	MXD4	MAX dimerization protein 4 [Source:HGNC Symbol;Acc:HGNC:13906]	4:2247432-2262294	4.2522	4.64362	4.18737	4.40744	4.21573	4.11692	3.74767	4.25862	4.07603	813	1014	834	914	926	778	694	782	748
ENSG00000202512	RN7SKP230	RNA, 7SK small nuclear pseudogene 230 [Source:HGNC Symbol;Acc:HGNC:45954]	5:109699500-109699834	0	0	0	0	0	0	0	0	0	0	0	0	0	0	0	0	0	0
ENSG00000140526	ABHD2	abhydrolase domain containing 2 [Source:HGNC Symbol;Acc:HGNC:18717]	15:89087459-89202360	17.8687	21.9759	22.0028	21.5961	21.6861	21.6663	22.1955	23.9348	22.463	4545	6384	5830	5958	6337	5447	5468	5847	5484
ENSG00000140527	WDR93	WD repeat domain 93 [Source:HGNC Symbol;Acc:HGNC:26924]	15:89690797-89743638	0	0	0	0	0	0	0	0	0	0	0	0	0	0	0	0	0	0
ENSG00000140525	FANCI	Fanconi anemia complementation group I [Source:HGNC Symbol;Acc:HGNC:25568]	15:89243949-89317261	17.4902	21.0044	20.4921	20.8381	21.9873	21.9231	19.8602	21.7786	21.4571	4349	5965	5308	5620	6281	5388	4783	5201	5121
ENSG00000140522	RLBP1	retinaldehyde binding protein 1 [Source:HGNC Symbol;Acc:HGNC:10024]	15:89209869-89221751	0	0	0	0	0	0	0	0	0	0	0	0	0	0	0	0	0	0
ENSG00000140521	POLG	polymerase (DNA directed), gamma [Source:HGNC Symbol;Acc:HGNC:9179]	15:89316305-89334861	9.46652	9.03077	9.00181	9.90679	8.90874	8.36416	8.48438	7.93691	8.14847	1910	2081	1892	2168	2065	1668	1658	1538	1578
ENSG00000246541	RP11-363G15.2	-	4:94117792-94207556	0	0	0	0	0	0	0	0	0	0	0	0	0	0	0	0	0	0
ENSG00000258244	OSTF1P1	osteoclast stimulating factor 1 pseudogene 1 [Source:HGNC Symbol;Acc:HGNC:31439]	12:114588194-114588802	0	0	0	0	0	0	0	0	0	0	0	0	0	0	0	0	0	0
ENSG00000167107	ACSF2	acyl-CoA synthetase family member 2 [Source:HGNC Symbol;Acc:HGNC:26101]	17:50426158-50474845	0.934633	0.825752	1.07584	0.834412	1.01969	0.90282	0.842725	0.995166	0.828361	221	223	265	214	277	211	193	226	188
ENSG00000167106	FAM102A	family with sequence similarity 102 member A [Source:HGNC Symbol;Acc:HGNC:31419]	9:127940579-127980513	1.84578	1.7503	1.81436	1.78024	1.72224	1.87089	1.45214	1.62044	1.55051	542	587	555	567	581	543	413	457	437
ENSG00000280734	LINC01232	long intergenic non-protein coding RNA 1232 [Source:HGNC Symbol;Acc:HGNC:49755]	13:99486962-99499306	0.595961	1.02714	0.692541	0.618864	0.638881	0.64739	0.796671	0.738098	0.601304	95	187	115	107	117	102	123	113	92
ENSG00000167104	BPIFB6	BPI fold containing family B member 6 [Source:HGNC Symbol;Acc:HGNC:16504]	20:33031648-33044047	0	0	0	0	0	0	0	0	0	0	0	0	0	0	0	0	0	0
ENSG00000167103	PIP5KL1	phosphatidylinositol-4-phosphate 5-kinase-like 1 [Source:HGNC Symbol;Acc:HGNC:28711]	9:127920879-127930797	0.253462	0.332892	0.396985	0.239836	0.197402	0.33067	0.261696	0.305578	0.389159	38	57	62	39	34	49	38	44	56
ENSG00000239503	MARK2P8	MAP/microtubule affinity-regulating kinase 2 pseudogene 8 [Source:HGNC Symbol;Acc:HGNC:39799]	3:128748538-128749489	0	0	0	0	0	0	0	0	0	0	0	0	0	0	0	0	0	0
ENSG00000167100	SAMD14	sterile alpha motif domain containing 14 [Source:HGNC Symbol;Acc:HGNC:27312]	17:50110040-50129882	0	0.00606653	0	0.00958413	0	0	0.00357737	0	0	0	2	0	3	0	0	1	0	0
ENSG00000240265	RP11-62G11.1	-	3:69535664-69536693	0	0	0	0	0	0	0	0	0	0	0	0	0	0	0	0	0	0
ENSG00000280739	EIF1B-AS1	EIF1B antisense RNA 1 [Source:HGNC Symbol;Acc:HGNC:44555]	3:40173145-40309698	0.7677	0.736812	0.581064	0.598899	0.623259	0.687089	0.617336	0.445785	0.638337	104	114	82	88	97	92	81	58	83
ENSG00000180042	OR1R1P	olfactory receptor family 1 subfamily R member 1 pseudogene [Source:HGNC Symbol;Acc:HGNC:8226]	17:3385930-3386833	0	0	0	0	0	0	0	0	0	0	0	0	0	0	0	0	0	0
ENSG00000244945	RP11-1379J22.2	-	5:179595904-179603741	0.048712	0.0213208	0	0	0.0211911	0	0.0502906	0	0	2	1	0	0	1	0	2	0	0
ENSG00000166851	PLK1	polo-like kinase 1 [Source:HGNC Symbol;Acc:HGNC:9077]	16:23677656-23690367	16.6287	16.1956	22.054	17.7105	18.4299	16.438	17.6148	18.1844	17.9504	2964	3297	4095	3424	3774	2896	3041	3113	3071
ENSG00000166856	GPR182	G protein-coupled receptor 182 [Source:HGNC Symbol;Acc:HGNC:13708]	12:56994446-56998441	0	0	0	0.0098052	0	0	0.0219665	0	0	0	0	0	1	0	0	2	0	0
ENSG00000166855	CLPX	caseinolytic mitochondrial matrix peptidase chaperone subunit [Source:HGNC Symbol;Acc:HGNC:2088]	15:65148219-65185342	12.0333	11.9068	11.8223	11.5775	11.3398	11.0597	11.8413	12.0325	11.1721	1791	2024	1833	1869	1939	1627	1707	1720	1596
ENSG00000254608	RP11-56A10.1	-	8:54648993-54869903	0	0	0	0	0	0	0	0	0	0	0	0	0	0	0	0	0	0
ENSG00000163374	YY1AP1	YY1 associated protein 1 [Source:HGNC Symbol;Acc:HGNC:30935]	1:155659443-155689000	9.11527	9.50136	9.99597	10.0631	9.88246	8.98899	9.10317	9.04367	9.46864	2016	2400	2303	2414	2511	1965	1950	1921	2010
ENSG00000163376	KBTBD8	kelch repeat and BTB (POZ) domain containing 8 [Source:HGNC Symbol;Acc:HGNC:30691]	3:66998307-67011210	2.89333	2.94953	3.11474	2.52784	2.56045	2.96215	2.9944	2.88346	3.09342	420	489	471	398	427	425	421	402	431
ENSG00000163377	FAM19A4	family with sequence similarity 19 (chemokine (C-C motif)-like), member A4 [Source:HGNC Symbol;Acc:HGNC:21591]	3:68731766-68953297	0	0	0	0	0	0	0	0	0.0270343	0	0	0	0	0	0	0	0	2
ENSG00000163378	EOGT	EGF domain-specific O-linked N-acetylglucosamine (GlcNAc) transferase [Source:HGNC Symbol;Acc:HGNC:28526]	3:68975214-69013961	0.724293	0.730437	0.720124	0.685665	0.776811	0.696812	0.80123	0.632942	0.724299	224	258	232	230	276	213	240	188	215
ENSG00000255148	RP4-791M13.4	-	1:149018671-149026269	0	0	0	0	0	0	0	0	0	0	0	0	0	0	0	0	0	0
ENSG00000276746	Metazoa_SRP	Metazoan signal recognition particle RNA [Source:RFAM;Acc:RF00017]	6:33562880-33563130	0	0	0	0	0	0	0	0	0	0	0	0	0	0	0	0	0	0
ENSG00000255142	AP006621.6	-	11:781645-782105	2.36014	2.65698	2.7512	2.64224	2.6414	2.72907	2.78493	4.38833	2.81022	14	18	17	17	18	16	16	25	16
ENSG00000276744	CTD-2562G15.3	-	15:75452964-75453947	0.243288	0.127795	0.326938	0.0897016	0.211779	0.738389	0.452105	0.810606	0.608323	5	3	7	2	5	15	9	16	12
ENSG00000255140	OR5BN2P	olfactory receptor family 5 subfamily BN member 2 pseudogene [Source:HGNC Symbol;Acc:HGNC:29194]	11:56116639-56117256	0	0	0	0	0	0	0	0	0	0	0	0	0	0	0	0	0	0
ENSG00000255147	RP11-655M14.4	-	11:67749043-67756968	0	0	0	0	0	0	0	0	0	0	0	0	0	0	0	0	0	0
ENSG00000255146	RP11-659P15.1	-	11:58044110-58060138	0	0	0	0	0	0	0	0	0	0	0	0	0	0	0	0	0	0
ENSG00000276740	RP11-381O6.1	-	13:107465984-107466674	0	0	0.0664907	0	0	0	0.143084	0.144299	0.0721828	0	0	1	0	0	0	2	2	1
ENSG00000255144	RP11-589N15.1	-	8:11895850-11896870	0	0	0	0	0	0	0	0	0	0	0	0	0	0	0	0	0	0
ENSG00000282393	CTD-3113P16.11	-	19:248551-251571	1.9018	1.49866	2.14514	1.78262	1.64161	1.60345	2.01264	1.65015	1.89886	120	108	141	122	119	100	123	100	115
ENSG00000282390	RP11-29A19.2	-	10:1290018-1293002	0	0	0	0	0	0	0	0	0	0	0	0	0	0	0	0	0	0
ENSG00000249830	RP11-121L11.3	-	5:3452816-3461660	0	0	0	0	0	0	0	0	0	0	0	0	0	0	0	0	0	0
ENSG00000227818	RP11-227F8.2	-	1:162039016-162039567	0	0	0	0	0	0	0	0	0	0	0	0	0	0	0	0	0	0
ENSG00000056586	RC3H2	ring finger and CCCH-type domains 2 [Source:HGNC Symbol;Acc:HGNC:21461]	9:122844556-122905341	3.25487	4.11679	3.80977	3.73524	3.83354	3.95673	3.99797	4.06624	3.92236	1181	1706	1440	1470	1598	1419	1405	1417	1366
ENSG00000227814	MRPS17P9	mitochondrial ribosomal protein S17 pseudogene 9 [Source:HGNC Symbol;Acc:HGNC:29739]	X:119379712-119380104	0	0	0	0	0	0	0	0	0	0	0	0	0	0	0	0	0	0
ENSG00000227815	RP11-195C7.3	-	1:176272483-176273402	0.240865	0.0527254	0.0577925	0.444217	0	0.0609205	0	0	0.12548	4	1	1	8	0	1	0	0	2
ENSG00000227817	ARHGAP42P1	Rho GTPase activating protein 42 pseudogene 1 [Source:HGNC Symbol;Acc:HGNC:43940]	2:131328176-131330857	0	0	0.0232515	0	0	0	0	0	0	0	0	1	0	0	0	0	0	0
ENSG00000227811	FAM212B-AS1	FAM212B antisense RNA 1 [Source:HGNC Symbol;Acc:HGNC:49446]	1:111739841-111747798	0	0.0576174	0.0473818	0.0910113	0.0286476	0.0166432	0.0679528	0	0.0514209	0	4	3	6	2	1	4	0	3
ENSG00000227813	RP1-180M12.1	-	22:31890344-31891434	0	0	0	0	0	0	0	0	0	0	0	0	0	0	0	0	0	0
ENSG00000265411	RN7SL656P	RNA, 7SL, cytoplasmic 656, pseudogene [Source:HGNC Symbol;Acc:HGNC:46672]	17:46319679-46319959	0	0	0	0	0	0	0	0	0	0	0	0	0	0	0	0	0	0
ENSG00000128849	CGNL1	cingulin-like 1 [Source:HGNC Symbol;Acc:HGNC:25931]	15:57375967-57550727	0	0.00961833	0.0158193	0	0.00956454	0	0	0	0	0	2	3	0	2	0	0	0	0
ENSG00000064393	HIPK2	homeodomain interacting protein kinase 2 [Source:HGNC Symbol;Acc:HGNC:14402]	7:139561570-139777778	11.7341	15.9802	16.003	16.1069	16.4613	16.6228	15.8121	14.9296	14.5211	4388	6825	6234	6533	7072	6144	5727	5362	5212
ENSG00000225526	MKRN2OS	MKRN2 opposite strand [Source:HGNC Symbol;Acc:HGNC:40375]	3:12514934-12561059	0	0	0	0	0.0168194	0	0	0	0	0	0	0	0	1	0	0	0	0
ENSG00000225527	RP11-383B4.4	-	10:18531849-18533336	0.463651	0.30448	0.556458	0.427546	0.605453	0.820997	1.31657	0.603577	0.724624	4	3	5	4	6	7	11	5	6
ENSG00000241135	LINC00881	long intergenic non-protein coding RNA 881 [Source:HGNC Symbol;Acc:HGNC:48567]	3:157089881-157101135	0.279988	0.122563	0.470366	0.129076	0.060939	0	0.180686	0.218627	0.364644	8	4	14	4	2	0	5	6	10
ENSG00000241134	BET1P1	Bet1 golgi vesicular membrane trafficking protein pseudogene 1 [Source:HGNC Symbol;Acc:HGNC:51363]	7:150749736-150750094	0	0	0	0	0	0	0	0	0	0	0	0	0	0	0	0	0	0
ENSG00000225522	RP11-203F10.1	-	1:204183006-204183537	0	0.0787908	0	0.165914	0	0	0	0	0.187512	0	1	0	2	0	0	0	0	2
ENSG00000225523	IGKV6D-21	immunoglobulin kappa variable 6D-21 (non-functional) [Source:HGNC Symbol;Acc:HGNC:5837]	2:90021567-90022185	0	0	0	0	0	0	0	0	0	0	0	0	0	0	0	0	0	0
ENSG00000225520	TTTY16	testis-specific transcript, Y-linked 16 (non-protein coding) [Source:HGNC Symbol;Acc:HGNC:18840]	Y:7699357-7701247	0	0	0	0	0	0	0	0	0	0	0	0	0	0	0	0	0	0
ENSG00000241130	RP11-507J18.1	-	15:50798670-50798951	0	0	0	0	0	0	0	0	0	0	0	0	0	0	0	0	0	0
ENSG00000253460	IGKV2OR22-3	immunoglobulin kappa variable 2/OR22-3 (pseudogene) [Source:HGNC Symbol;Acc:HGNC:5812]	22:16921443-16922173	0	0	0	0	0	0	0	0	0	0	0	0	0	0	0	0	0	0
ENSG00000225528	RP3-370M22.8	-	22:39960397-39964718	1.57805	3.06738	1.93902	1.89138	1.45601	1.27727	1.336	1.9717	1.34816	50	111	64	65	53	40	41	60	41
ENSG00000259502	RP11-643G16.3	-	14:67610986-67613864	0.154714	0	0	0.213963	0	0	0	0.0805419	0.161158	2	0	0	3	0	0	0	1	2
ENSG00000157005	SST	somatostatin [Source:HGNC Symbol;Acc:HGNC:11329]	3:187668906-187670399	0	0	0	0	0	0	0	0	0	0	0	0	0	0	0	0	0	0
ENSG00000218776	MTATP6P31	mitochondrially encoded ATP synthase 6 pseudogene 31 [Source:HGNC Symbol;Acc:HGNC:52186]	6:153666627-153667318	0	0	0	0	0	0	0	0	0	0	0	0	0	0	0	0	0	0
ENSG00000184014	DENND5A	DENN/MADD domain containing 5A [Source:HGNC Symbol;Acc:HGNC:19344]	11:9138825-9265390	5.1922	5.79124	6.01433	5.66808	6.23418	5.47754	5.7009	5.1379	5.61685	1592	2028	1921	1885	2196	1660	1693	1513	1653
ENSG00000184012	TMPRSS2	transmembrane protease, serine 2 [Source:HGNC Symbol;Acc:HGNC:11876]	21:41464551-41531116	0	0	0	0.00483016	0	0	0	0	0	0	0	0	1	0	0	0	0	0
ENSG00000162753	SLC9C2	solute carrier family 9, member C2 (putative) [Source:HGNC Symbol;Acc:HGNC:28664]	1:173500464-173603094	0.0307118	0.0874031	0.162167	0.070797	0.0868911	0.116532	0.0555011	0.0959446	0.128004	4	13	22	10	13	15	7	12	16
ENSG00000253465	IGHVIV-44-1	immunoglobulin heavy variable (IV)-44-1 (pseudogene) [Source:HGNC Symbol;Acc:HGNC:5710]	14:106489345-106489756	0	0	0	0	0	0	0	0	0	0	0	0	0	0	0	0	0	0
ENSG00000179820	MYADM	myeloid-associated differentiation marker [Source:HGNC Symbol;Acc:HGNC:7544]	19:53866223-53876437	5.48259	3.77881	3.30627	3.36662	3.96466	3.48108	3.51612	4.35092	4.66125	1560	1228	980	1039	1296	979	969	1189	1273
ENSG00000179826	MRGPRX3	MAS related GPR family member X3 [Source:HGNC Symbol;Acc:HGNC:17980]	11:18120955-18138480	0	0	0	0	0	0	0	0	0	0	0	0	0	0	0	0	0	0
ENSG00000162426	SLC45A1	solute carrier family 45 member 1 [Source:HGNC Symbol;Acc:HGNC:17939]	1:8317826-8344167	0	0	0	0	0	0	0	0	0	0	0	0	0	0	0	0	0	0
ENSG00000275788	Metazoa_SRP	Metazoan signal recognition particle RNA [Source:RFAM;Acc:RF00017]	13:30684029-30684278	0	0	0	0	0	0	0	0	0	0	0	0	0	0	0	0	0	0
ENSG00000148704	VAX1	ventral anterior homeobox 1 [Source:HGNC Symbol;Acc:HGNC:12660]	10:117128521-117138301	0	0	0	0	0	0	0	0	0	0	0	0	0	0	0	0	0	0
ENSG00000268204	CTD-3214H19.6	-	19:7633766-7636990	1.70383	1.49185	1.30848	2.35633	2.12577	1.72384	1.11415	2.42452	1.47931	30	30	24	45	43	30	19	41	25
ENSG00000268205	CTC-444N24.11	-	19:57304305-57308562	6.39795	3.2686	3.52962	2.89233	2.46642	3.19672	2.89072	2.6225	3.39734	569	332	327	279	252	281	249	224	290
ENSG00000213652	HMGB3P30	high mobility group box 3 pseudogene 30 [Source:HGNC Symbol;Acc:HGNC:39333]	X:112689915-112690520	0	0	0	0	0	0	0	0	0	0	0	0	0	0	0	0	0	0
ENSG00000279189	RP11-861E23.2	-	11:133297189-133302634	0	0	0	0	0	0	0	0	0	0	0	0	0	0	0	0	0	0
ENSG00000268201	CTD-3138B18.6	-	19:58266635-58267685	1.9151	1.06705	1.50416	1.28411	0.833533	1.23299	1.79757	0.997017	0.634906	22	14	18	16	11	14	20	11	7
ENSG00000268203	CTD-2396E7.9	-	19:6494320-6494805	0	0	0	0	0	0	0	0	0	0	0	0	0	0	0	0	0	0
ENSG00000279184	RP3-323A16.1	-	22:35160947-35215025	0	0	0	0	0	0	0	0	0	0	0	0	0	0	0	0	0	0
ENSG00000279187	RP11-455O6.5	-	17:81262920-81265401	0.0192828	0	0.0185113	0	0	0.0195132	0.0398353	0	0	1	0	1	0	0	1	2	0	0
ENSG00000279186	CH507-39O4.3	-	21:5703182-5705637	0	0	0	0	0	0	0	0	0	0	0	0	0	0	0	0	0	0
ENSG00000279181	RP11-711M9.2	-	2:73998337-73998548	0	0	0	0	0	0	0	0	0	0	0	0	0	0	0	0	0	0
ENSG00000268209	RP11-618I10.3	-	4:69387580-69388307	0	0	0	0	0	0	0	0	0	0	0	0	0	0	0	0	0	0
ENSG00000279183	AC010412.1	-	19:40647563-40647937	0	0	0	0	0	0	0	0	0	0	0	0	0	0	0	0	0	0
ENSG00000279182	XX-C00717C00720L.1	-	22:50316035-50317025	0.144932	0.126892	0.0927709	0.133646	0.126162	0	0.0997692	0.0503082	0.0503313	3	3	2	3	3	0	2	1	1
ENSG00000204118	NAP1L6	nucleosome assembly protein 1-like 6 [Source:HGNC Symbol;Acc:HGNC:31706]	X:73126037-73128080	0.0234149	0	0	0.0431832	0.040785	0.0948025	0.0241857	0.0243911	0.146414	1	0	0	2	2	4	1	1	6
ENSG00000213657	RP11-346D6.4	-	10:52389112-52389488	0	0	0	0	0	0	0	0	0	0	0	0	0	0	0	0	0	0
ENSG00000204113	BMP2KL	BMP2 inducible kinase-like, pseudogene [Source:HGNC Symbol;Acc:HGNC:17080]	X:74185929-74187153	0	0	0	0	0	0	0	0	0	0	0	0	0	0	0	0	0	0
ENSG00000204110	RP1-153P14.8	-	6:37507348-37535616	0	0	0	0	0	0	0	0	0	0	0	0	0	0	0	0	0	0
ENSG00000204116	CHIC1	cysteine rich hydrophobic domain 1 [Source:HGNC Symbol;Acc:HGNC:1934]	X:73563200-73687102	0.149206	0.267361	0.309781	0.172755	0.175179	0.259787	0.419164	0.310709	0.242216	43	88	93	54	58	74	117	86	67
ENSG00000204117	RP4-640H8.2	-	20:37676910-37683234	0	0	0	0	0	0	0	0	0	0	0	0	0	0	0	0	0	0
ENSG00000250626	RP11-756P10.2	-	4:188777679-188796633	0	0	0	0.0443327	0	0	0	0	0	0	0	0	2	0	0	0	0	0
ENSG00000137145	DENND4C	DENN/MADD domain containing 4C [Source:HGNC Symbol;Acc:HGNC:26079]	9:19230435-19373545	2.96914	4.23526	4.13431	4.033	3.93402	4.41202	4.55474	4.3084	4.17739	879	1432	1275	1295	1338	1291	1306	1225	1187
ENSG00000137142	IGFBPL1	insulin like growth factor binding protein-like 1 [Source:HGNC Symbol;Acc:HGNC:20081]	9:38408994-38424447	0	0	0	0	0	0	0	0	0	0	0	0	0	0	0	0	0	0
ENSG00000259274	CTD-2501E16.2	-	15:60529973-60545159	0.110276	0.193164	0.105864	0.203379	0.384073	0.446489	0.227814	0.68913	0.459708	1	2	1	2	4	4	2	6	4
ENSG00000250623	RP11-317B7.3	-	4:2139673-2141058	0	0	0	0	0	0	0	0	0	0	0	0	0	0	0	0	0	0
ENSG00000205076	LGALS7	lectin, galactoside-binding, soluble, 7 [Source:HGNC Symbol;Acc:HGNC:6568]	19:38770971-38773492	0	0	0	0	0	0	0	0	0	0	0	0	0	0	0	0	0	0
ENSG00000105011	ASF1B	anti-silencing function 1B histone chaperone [Source:HGNC Symbol;Acc:HGNC:20996]	19:14119509-14136956	15.6764	13.4688	13.5866	15.8674	16.5998	13.395	14.8376	15.6428	15.5507	1441	1414	1301	1582	1753	1217	1321	1381	1372
ENSG00000233888	MTCO2P17	MT-CO2 pseudogene 17 [Source:HGNC Symbol;Acc:HGNC:52033]	2:202614853-202615529	0	0	0	0	0	0	0	0	0	0	0	0	0	0	0	0	0	0
ENSG00000252257	RN7SKP265	RNA, 7SK small nuclear pseudogene 265 [Source:HGNC Symbol;Acc:HGNC:45989]	3:181968459-181968681	0	0	0	0	0	0	0	0	0	0	0	0	0	0	0	0	0	0
ENSG00000233882	RP11-309H21.2	-	1:191221159-191228467	0	0	0	0	0	0	0	0	0	0	0	0	0	0	0	0	0	0
ENSG00000233880	RP11-497J7.2	-	X:35761499-35762479	0	0	0	0	0	0	0	0	0	0	0	0	0	0	0	0	0	0
ENSG00000233887	ERVWE2	-	X:97847263-97849017	0	0	0	0	0	0.0275965	0	0	0	0	0	0	0	0	1	0	0	0
ENSG00000233884	XXyac-YM21GA2.3	-	9:87848113-87853442	0	0	0	0	0	0	0	0	0	0	0	0	0	0	0	0	0	0
ENSG00000233885	YEATS2-AS1	YEATS2 antisense RNA 1 [Source:HGNC Symbol;Acc:HGNC:41101]	3:183806457-183810783	0	0	0	0	0	0.00947229	0	0	0	0	0	0	0	0	1	0	0	0
ENSG00000270371	RP11-417P24.1	-	14:105785505-105785831	0	0	0	0	0	0	0	0	0	0	0	0	0	0	0	0	0	0
ENSG00000283118	RP11-107E5.4	-	2:144444848-144450450	0	0	0	0	0	0	0	0	0	0	0	0	0	0	0	0	0	0
ENSG00000283117	CTD-2060L22.1	-	7:10449820-10779944	1.27449	1.82848	2.00469	1.13257	1.48361	1.66231	1.82321	2.07845	2.09575	83	136	136	80	111	107	115	130	131
ENSG00000250629	RP11-122C5.3	-	5:38783580-38792754	0	0	0	0	0	0	0	0	0	0	0	0	0	0	0	0	0	0
ENSG00000270379	HEATR9	HEAT repeat containing 9 [Source:HGNC Symbol;Acc:HGNC:26548]	17:35854946-35868891	0	0.0217938	0.00796275	0.0306025	0.0216683	0	0.0257031	0.0172809	0.0345777	0	3	1	4	3	0	3	2	4
ENSG00000283110	RP11-1437A8.7	-	16:33386105-33386349	0	0	0	0	0	0	0	0	0	0	0	0	0	0	0	0	0	0
ENSG00000278582	RP11-1H8.6	-	15:34520608-34521791	0	0	0	0	0	0	0	0	0	0	0	0	0	0	0	0	0	0
ENSG00000278580	RP11-272M24.2	-	13:85837126-85837532	0	0	0	0	0	0	0	0	0	0	0	0	0	0	0	0	0	0
ENSG00000104756	KCTD9	potassium channel tetramerization domain containing 9 [Source:HGNC Symbol;Acc:HGNC:22401]	8:25427847-25458476	9.17059	9.7808	9.81983	8.85463	8.53761	10.3746	9.62822	9.78706	9.47066	1481	1804	1652	1551	1584	1656	1506	1518	1468
ENSG00000278586	CTA-313A17.5	-	7:102264706-102264979	0	0	0	0	0	0	0	0	0	0	0	0	0	0	0	0	0	0
ENSG00000278588	HIST1H2BI	histone cluster 1, H2bi [Source:HGNC Symbol;Acc:HGNC:4756]	6:26272976-26273356	0	0	0	0	0	0	0	0	0.130914	0	0	0	0	0	0	0	0	1
ENSG00000278589	ZACNP1	zinc activated ligand-gated ion channel pseudogene 1 [Source:HGNC Symbol;Acc:HGNC:51915]	4:108415220-108416639	0	0	0	0	0	0	0	0	0	0	0	0	0	0	0	0	0	0
ENSG00000001561	ENPP4	ectonucleotide pyrophosphatase/phosphodiesterase 4 (putative) [Source:HGNC Symbol;Acc:HGNC:3359]	6:46129993-46146699	0	0	0	0	0.0268816	0.0208264	0	0	0	0	0	0	0	3	2	0	0	0
ENSG00000159128	IFNGR2	interferon gamma receptor 2 (interferon gamma transducer 1) [Source:HGNC Symbol;Acc:HGNC:5440]	21:33402896-33479348	6.51448	7.11846	7.76416	7.32151	7.60628	7.37637	7.36506	7.80968	7.26813	621	775	771	757	833	695	680	715	665
ENSG00000122912	SLC25A16	solute carrier family 25 (mitochondrial carrier), member 16 [Source:HGNC Symbol;Acc:HGNC:10986]	10:68477999-68527474	1.43782	2.44336	1.89886	1.32171	1.7292	2.61675	1.41424	2.17917	2.19828	338	656	465	337	467	608	322	492	496
ENSG00000258451	RP11-903H12.3	-	14:20693480-20707120	0	0	0	0	0	0	0	0	0	0	0	0	0	0	0	0	0	0
ENSG00000258456	PTCD2P1	pentatricopeptide repeat domain 2 pseudogene 1 [Source:HGNC Symbol;Acc:HGNC:31718]	14:20524287-20525422	0	0	0	0	0	0	0	0	0	0	0	0	0	0	0	0	0	0
ENSG00000253259	RP11-737F9.2	-	8:130892070-130892785	0	0	0	0	0	0	0	0	0	0	0	0	0	0	0	0	0	0
ENSG00000253258	RP11-539E17.5	-	8:123181638-123182788	1.10916	0.755309	0.768944	0.795361	1.07269	0.81044	1.27241	1.15482	1.41239	18	14	13	14	20	13	20	18	22
ENSG00000257976	RP11-388G3.1	-	14:25431193-25432234	0	0	0	0.0423543	0	0	0	0	0	0	0	0	1	0	0	0	0	0
ENSG00000253251	CTC-534A2.2	-	5:65624765-65630891	3.90235	3.5367	3.52701	3.682	3.77418	3.74036	3.18082	3.5404	3.28111	171	177	161	175	190	162	135	149	138
ENSG00000129038	LOXL1	lysyl oxidase like 1 [Source:HGNC Symbol;Acc:HGNC:6665]	15:73925989-73952137	0	0	0	0	0	0.0243294	0	0	0	0	0	0	0	0	3	0	0	0
ENSG00000253252	RP11-10A14.6	-	8:9180251-9182519	0	0	0	0	0	0	0	0	0	0	0	0	0	0	0	0	0	0
ENSG00000154065	ANKRD29	ankyrin repeat domain 29 [Source:HGNC Symbol;Acc:HGNC:27110]	18:23598926-23662885	0	0	0.00455759	0	0	0	0	0	0	0	0	1	0	0	0	0	0	0
ENSG00000205240	OR7E36P	olfactory receptor family 7 subfamily E member 36 pseudogene [Source:HGNC Symbol;Acc:HGNC:8409]	13:41431248-41432201	0	0	0	0	0	0	0	0	0	0	0	0	0	0	0	0	0	0
ENSG00000251311	RP11-249M12.2	-	5:116742991-116762209	0	0	0	0	0	0	0	0	0	0	0	0	0	0	0	0	0	0
ENSG00000271715	CTD-2256P15.5	-	5:10269489-10269918	0.111302	0.389923	0.213805	0	0	0.450643	0	0	0	1	4	2	0	0	4	0	0	0
ENSG00000102128	RAB40AL	RAB40A, member RAS oncogene family-like [Source:HGNC Symbol;Acc:HGNC:25410]	X:102937250-102938962	0.0559065	0	0.107312	0.180371	0.121652	0	0.317421	0.116417	0	2	0	4	7	5	0	11	4	0
ENSG00000107223	EDF1	endothelial differentiation-related factor 1 [Source:HGNC Symbol;Acc:HGNC:3164]	9:136862119-136866286	84.5869	70.7215	67.8046	78.6798	77.2159	72.674	68.5844	64.9598	77.5656	3037	2900	2536	3064	3185	2579	2385	2240	2673
ENSG00000279547	AC009491.1	-	Y:8710885-8745985	0	0	0	0	0	0	0	0	0	0	0	0	0	0	0	0	0	0
ENSG00000258399	MEG8	maternally expressed 8 (non-protein coding) [Source:HGNC Symbol;Acc:HGNC:14574]	14:100894770-100935999	0	0.0145342	0.0318779	0.0306056	0	0	0	0	0	0	1	2	2	0	0	0	0	0
ENSG00000152969	JAKMIP1	janus kinase and microtubule interacting protein 1 [Source:HGNC Symbol;Acc:HGNC:26460]	4:6026199-6200591	0	0	0	0.0176993	0.0167164	0	0	0	0	0	0	0	2	2	0	0	0	0
ENSG00000232823	TXNP1	thioredoxin pseudogene 1 [Source:HGNC Symbol;Acc:HGNC:49481]	10:119683127-119683823	0	0	0	0	0	0	0	0	0	0	0	0	0	0	0	0	0	0
ENSG00000232821	AC003986.6	-	7:19112474-19114271	0	0	0	0.0257938	0.146144	0.0283061	0.0866785	0	0.0291515	0	0	0	1	6	1	3	0	1
ENSG00000232827	LINC01189	long intergenic non-protein coding RNA 1189 [Source:HGNC Symbol;Acc:HGNC:49592]	9:62515191-62522018	0	0.0126217	0.0138347	0.0265783	0.0125449	0.029167	0	0.0150122	0	0	1	1	2	1	2	0	1	0
ENSG00000232825	RP5-896L10.1	-	1:99004276-99148852	0	0	0	0	0	0	0	0	0	0	0	0	0	0	0	0	0	0
ENSG00000232824	PRR13P1	proline rich 13 pseudogene 1 [Source:HGNC Symbol;Acc:HGNC:50614]	1:198197779-198198186	0	0	0	0	0	0	0	0	0	0	0	0	0	0	0	0	0	0
ENSG00000279549	AP000437.3	-	11:61143380-61145464	0.114818	0.160851	0.06613	0.0846889	0.0999475	0.0696861	0	0	0.263171	5	8	3	4	5	3	0	0	11
ENSG00000232829	GSTO3P	glutathione S-transferase omega 3, pseudogene [Source:HGNC Symbol;Acc:HGNC:23065]	3:130827659-130828376	0	0	0	0	0.0580246	0	0	0	0	0	0	0	0	1	0	0	0	0
ENSG00000232828	AF196970.3	-	X:48698963-48737163	0.103533	0	0.198731	0.0477116	0.135163	0.209488	0.213776	0.0538978	0.431434	2	0	4	1	3	4	4	1	8
ENSG00000146352	CLVS2	clavesin 2 [Source:HGNC Symbol;Acc:HGNC:23046]	6:122995971-123072927	0.0349261	0.0373774	0.00745205	0.0286255	0.0168915	0.0196327	0.0200355	0.0202057	0.0202149	9	11	2	8	5	5	5	5	5
ENSG00000120519	SLC10A7	solute carrier family 10 member 7 [Source:HGNC Symbol;Acc:HGNC:23088]	4:146253975-146521964	2.51524	2.56099	2.28767	2.17277	2.036	2.20607	2.34678	2.17401	2.12031	571	664	541	535	531	495	516	474	462
ENSG00000155330	C16orf87	chromosome 16 open reading frame 87 [Source:HGNC Symbol;Acc:HGNC:33754]	16:46796607-46831411	2.53345	2.55661	2.46806	2.34071	2.18652	2.57948	2.72655	2.40871	2.37668	472	544	479	473	468	475	492	431	425
ENSG00000235890	TSPEAR-AS1	TSPEAR antisense RNA 1 [Source:HGNC Symbol;Acc:HGNC:1271]	21:44506807-44516575	0	0	0	0	0	0	0	0	0	0	0	0	0	0	0	0	0	0
ENSG00000278635	CTD-2318O12.1	-	12:9415641-9416718	0	0	0	0	0	0	0	0	0	0	0	0	0	0	0	0	0	0
ENSG00000037749	MFAP3	microfibrillar associated protein 3 [Source:HGNC Symbol;Acc:HGNC:7034]	5:154038906-154220478	1.26635	2.22291	2.05724	2.19475	2.99948	1.24426	2.28179	2.38985	1.51601	208	417	352	391	566	202	363	377	239
ENSG00000273055	CTB-13F3.1	-	7:107942116-107942740	1.53206	1.00607	1.98549	0.565044	0.466742	1.16252	0.949085	0.478532	0.638523	20	15	27	8	7	15	12	6	8
ENSG00000273056	RP11-77E14.2	-	9:7786105-7786688	0.32789	0	0.157425	0.377927	0.428172	0.41474	0.0846501	0.0853689	0.085408	4	0	2	5	6	5	1	1	1
ENSG00000273051	OR51F4P	olfactory receptor family 51 subfamily F member 4 pseudogene [Source:HGNC Symbol;Acc:HGNC:31282]	11:4752046-4752944	0	0	0	0	0	0	0	0	0	0	0	0	0	0	0	0	0	0
ENSG00000170523	KRT83	keratin 83, type II [Source:HGNC Symbol;Acc:HGNC:6460]	12:52314301-52321398	0	0	0	0	0	0	0	0	0	0	0	0	0	0	0	0	0	0
ENSG00000170522	ELOVL6	ELOVL fatty acid elongase 6 [Source:HGNC Symbol;Acc:HGNC:15829]	4:110045846-110199199	8.07687	8.42534	8.80257	8.50241	8.52369	8.90298	9.67432	8.95828	8.88228	1855	2210	2106	2118	2249	2021	2152	1976	1958
ENSG00000170525	PFKFB3	6-phosphofructo-2-kinase/fructose-2,6-biphosphatase 3 [Source:HGNC Symbol;Acc:HGNC:8874]	10:6144934-6235545	2.07537	1.99886	2.26511	2.06317	2.26203	2.19102	1.97041	2.26424	2.02594	460	506	523	496	576	480	423	482	431
ENSG00000273058	RP11-385F5.5	-	1:236536162-236536704	0.617244	0.463244	0.761774	0.73165	0.690752	0.446055	0.364167	0.459074	0.367428	7	6	9	9	9	5	4	5	4
ENSG00000164548	TRA2A	transformer 2 alpha homolog (Drosophila) [Source:HGNC Symbol;Acc:HGNC:16645]	7:23504780-23532041	10.6662	9.79334	9.30994	9.36731	10.1434	10.6314	9.56906	10.0189	9.91318	1686	1768	1533	1606	1842	1661	1465	1521	1504
ENSG00000198553	KCNRG	potassium channel regulator [Source:HGNC Symbol;Acc:HGNC:18893]	13:50015254-50020922	0.0410668	0.0539237	0.019702	0.0378501	0.0714785	0.0207684	0.105994	0.0427577	0.0213886	2	3	1	2	4	1	5	2	1
ENSG00000198551	ZNF627	zinc finger protein 627 [Source:HGNC Symbol;Acc:HGNC:30570]	19:11559374-11619135	2.53538	2.81151	1.7981	2.04149	2.04385	2.84264	2.04443	2.00602	2.8088	379	480	280	331	351	420	296	288	403
ENSG00000198556	ZNF789	zinc finger protein 789 [Source:HGNC Symbol;Acc:HGNC:27801]	7:99472841-99503650	2.06718	2.47935	2.28388	2.74978	2.21414	2.66721	2.54136	2.62711	2.52876	603	826	694	870	742	769	718	736	708
ENSG00000198554	WDHD1	WD repeat and HMG-box DNA binding protein 1 [Source:HGNC Symbol;Acc:HGNC:23170]	14:54938950-55027105	9.84806	10.8477	11.1369	10.8287	10.8841	10.8478	12.5718	12.3729	11.8177	1713	2155	2018	2043	2175	1865	2118	2067	1973
ENSG00000198555	RP11-598D12.4	-	16:33976039-33987630	0	0	0	0	0	0	0	0	0	0	0	0	0	0	0	0	0	0
ENSG00000241907	RPS20P4	ribosomal protein S20 pseudogene 4 [Source:HGNC Symbol;Acc:HGNC:10407]	5:150021567-150021921	0	0	0.129423	0	0	0	0	0	0	0	0	1	0	0	0	0	0	0
ENSG00000163612	FAM86KP	family with sequence similarity 86 member K, pseudogene [Source:HGNC Symbol;Acc:HGNC:44098]	4:9153296-9165451	0	0.0849376	0	0	0	0	0	0	0	0	2	0	0	0	0	0	0	0
ENSG00000241905	NDUFS6P1	NADH:ubiquinone oxidoreductase subunit S6 pseudogene 1 [Source:HGNC Symbol;Acc:HGNC:52274]	3:135959275-135959590	0	0.265296	0	0.139662	0.131841	0	0.312884	0	0.157843	0	2	0	1	1	0	2	0	1
ENSG00000075223	SEMA3C	sema domain, immunoglobulin domain (Ig), short basic domain, secreted, (semaphorin) 3C [Source:HGNC Symbol;Acc:HGNC:10725]	7:80742538-80922359	0	0	0	0.011357	0	0	0.00636074	0.0192443	0	0	0	0	2	0	0	1	3	0
ENSG00000227035	MTATP6P18	mitochondrially encoded ATP synthase 6 pseudogene 18 [Source:HGNC Symbol;Acc:HGNC:52063]	7:64106822-64107572	0	0	0	0	0	0	0	0	0	0	0	0	0	0	0	0	0	0
ENSG00000164542	KIAA0895	KIAA0895 [Source:HGNC Symbol;Acc:HGNC:22206]	7:36324221-36390125	0.108622	0.161683	0.161622	0.152722	0.113458	0.107148	0.112148	0.12158	0.181071	40	68	62	61	48	39	40	43	64
ENSG00000160714	UBE2Q1	ubiquitin conjugating enzyme E2Q family member 1 [Source:HGNC Symbol;Acc:HGNC:15698]	1:154548577-154559028	10.7402	10.5525	10.9443	10.1109	9.89909	10.5894	10.6505	10.3377	10.5999	1138	1277	1208	1162	1205	1109	1093	1052	1078
ENSG00000160712	IL6R	interleukin 6 receptor [Source:HGNC Symbol;Acc:HGNC:6019]	1:154405193-154469450	0.0487716	0.0683254	0.187272	0.0809384	0.0636784	0.118423	0.0453164	0.213276	0.025404	10	16	40	18	15	24	9	42	5
ENSG00000160710	ADAR	adenosine deaminase, RNA-specific [Source:HGNC Symbol;Acc:HGNC:225]	1:154582062-154627999	17.9534	21.2861	21.9445	21.6571	21.3592	21.0163	21.2407	21.5037	19.8293	5840	7908	7436	7641	7982	6757	6692	6718	6191
ENSG00000215160	OR7E122P	olfactory receptor family 7 subfamily E member 122 pseudogene [Source:HGNC Symbol;Acc:HGNC:15050]	3:8688143-8689159	0	0	0	0	0	0	0	0	0	0	0	0	0	0	0	0	0	0
ENSG00000136950	ARPC5L	actin related protein 2/3 complex subunit 5-like [Source:HGNC Symbol;Acc:HGNC:23366]	9:124862130-124877733	10.0705	9.44449	8.58825	8.98381	9.3496	9.30832	9.59264	9.57944	9.56659	1111	1190	987	1075	1185	1015	1025	1015	1013
ENSG00000215162	LINC00269	long intergenic non-protein coding RNA 269 [Source:HGNC Symbol;Acc:HGNC:26586]	X:69179557-69209924	0	0	0	0	0	0	0	0	0	0	0	0	0	0	0	0	0	0
ENSG00000215165	TCEA1P3	transcription elongation factor A (SII), 1 pseudogene 3 [Source:HGNC Symbol;Acc:HGNC:30569]	9:38478471-38479350	0	0	0	0	0	0	0	0	0	0	0	0	0	0	0	0	0	0
ENSG00000083307	GRHL2	grainyhead-like transcription factor 2 [Source:HGNC Symbol;Acc:HGNC:2799]	8:101492432-101669726	0	0	0	0	0	0	0	0	0	0	0	0	0	0	0	0	0	0
ENSG00000096080	MRPS18A	mitochondrial ribosomal protein S18A [Source:HGNC Symbol;Acc:HGNC:14515]	6:43671303-43687791	37.9092	31.4511	31.9976	32.2116	32.9352	31.566	33.2767	33.4335	31.8817	1582	1499	1391	1458	1579	1302	1345	1340	1277
ENSG00000280055	TMEM75	transmembrane protein 75 [Source:HGNC Symbol;Acc:HGNC:32295]	8:127946559-127948723	0	0	0	0	0	0	0	0	0	0	0	0	0	0	0	0	0	0
ENSG00000267458	CTC-425F1.4	-	19:12944118-12944487	0	0	0	0	0	0	0	0	0	0	0	0	0	0	0	0	0	0
ENSG00000280054	RP1-197B17.7	-	12:47728151-47730598	0	0	0.056324	0	0	0	0	0.0407316	0	0	0	3	0	0	0	0	2	0
ENSG00000258869	RP11-204N11.1	-	14:97749264-97763989	0	0	0	0	0	0	0	0	0	0	0	0	0	0	0	0	0	0
ENSG00000267459	AC006116.27	-	19:56377037-56377792	0.126677	0.0554454	0.0607739	0.0583773	0.11027	0.128126	0	0.0659463	0	2	1	1	1	2	2	0	1	0
ENSG00000175467	SART1	squamous cell carcinoma antigen recognized by T-cells 1 [Source:HGNC Symbol;Acc:HGNC:10538]	11:65961689-65979828	18.0947	16.5715	17.478	16.9038	16.4938	15.5554	16.052	15.0723	15.3784	2415	2526	2430	2447	2529	2052	2075	1932	1970
ENSG00000237864	LINC00322	long intergenic non-protein coding RNA 322 [Source:HGNC Symbol;Acc:HGNC:33698]	21:43322417-43332039	0	0	0	0	0	0	0	0	0	0	0	0	0	0	0	0	0	0
ENSG00000181214	OR8G2P	-	11:124224732-124225639	0	0.0923275	0.303703	0	0.367199	0.266749	0.217778	0.109814	0.054932	0	2	6	0	8	5	4	2	1
ENSG00000175463	TBC1D10C	TBC1 domain family member 10C [Source:HGNC Symbol;Acc:HGNC:24702]	11:67403915-67410089	0.0696611	0.034855	0.0382143	0.0367026	0.0216577	0.0352392	0.0256889	0.0207256	0.0570268	14	8	8	8	5	7	5	4	11
ENSG00000105402	NAPA	NSF attachment protein alpha [Source:HGNC Symbol;Acc:HGNC:7641]	19:47487637-47515240	3.37378	3.01288	3.50858	3.30775	3.46868	3.3361	3.32874	3.1819	3.26669	1104	1126	1196	1174	1304	1079	1055	1000	1026
ENSG00000105401	CDC37	cell division cycle 37 [Source:HGNC Symbol;Acc:HGNC:1735]	19:10391134-10420121	24.834	29.4974	28.0827	22.1355	24.7843	22.6361	24.4234	26.4327	19.7104	3371	4573	3971	3259	3865	3037	3211	3446	2568
ENSG00000279979	CTD-2154B17.3	-	5:10675317-10675575	0	0	0	0	0	0	0	0	0	0	0	0	0	0	0	0	0	0
ENSG00000105404	RABAC1	Rab acceptor 1 (prenylated) [Source:HGNC Symbol;Acc:HGNC:9794]	19:41956681-41959390	4.84954	3.63388	3.63535	3.80966	3.27264	3.06884	3.66618	3.12041	2.92367	534	457	417	455	414	334	391	330	309
ENSG00000131459	GFPT2	glutamine-fructose-6-phosphate transaminase 2 [Source:HGNC Symbol;Acc:HGNC:4242]	5:180300690-180353387	0.0157228	0	0	0.0289897	0.0205264	0.00795137	0.0324647	0.0163702	0	2	0	0	4	3	1	4	2	0
ENSG00000279976	RP11-243M5.4	-	12:130962175-130963028	0	0.0490828	0	0	0	0	0	0	0	0	1	0	0	0	0	0	0	0
ENSG00000105409	ATP1A3	ATPase, Na+/K+ transporting, alpha 3 polypeptide [Source:HGNC Symbol;Acc:HGNC:801]	19:41966582-41997497	0.260376	0.261347	0.38407	0.298611	0.298505	0.167054	0.150812	0.290945	0.330829	41	47	63	51	54	26	23	44	50
ENSG00000279970	RP11-299G20.5	-	15:101299656-101301648	0.480449	0.378617	0.299784	0.64231	0.376396	0.243059	0.421654	0.375204	0.700799	20	18	13	29	18	10	17	15	28
ENSG00000279971	CTD-2553L13.5	-	19:34645380-34646838	0	0	0	0	0	0	0	0	0	0	0	0	0	0	0	0	0	0
ENSG00000279972	RP11-354G16.1	-	14:41514972-41515350	0	0	0	0	0	0	0	0	0	0	0	0	0	0	0	0	0	0
ENSG00000222005	LINC01118	long intergenic non-protein coding RNA 1118 [Source:HGNC Symbol;Acc:HGNC:49261]	2:46816668-46822657	0.0141055	0	0	0.0390342	0	0.014274	0	0	0.0294007	1	0	0	3	0	1	0	0	2
ENSG00000092140	G2E3	G2/M-phase specific E3 ubiquitin protein ligase [Source:HGNC Symbol;Acc:HGNC:20338]	14:30559123-30620063	4.04091	4.12675	4.53862	3.29991	3.79709	4.31632	4.42002	4.21898	4.30245	1094	1276	1280	969	1181	1155	1159	1097	1118
ENSG00000181218	HIST3H2A	histone cluster 3, H2a [Source:HGNC Symbol;Acc:HGNC:20507]	1:228456979-228457873	46.2194	35.0355	38.155	42.0704	35.4352	37.0741	41.0373	42.8327	43.8072	864	748	743	853	761	685	743	769	786
ENSG00000132185	FCRLA	Fc receptor-like A [Source:HGNC Symbol;Acc:HGNC:18504]	1:161706972-161714352	0.0599012	0.023838	0.0470477	0.0451872	0.0142204	0.060606	0.0393596	0.0226822	0.0453909	11	5	9	9	3	11	7	4	8
ENSG00000108639	SYNGR2	synaptogyrin 2 [Source:HGNC Symbol;Acc:HGNC:11499]	17:78168558-78173527	10.7281	9.17887	8.97305	9.25206	15.547	9.07227	14.4602	9.32025	9.25013	2059	2012	1794	1926	3428	1721	2688	1718	1704
ENSG00000219314	RP1-273P12.1	-	6:17381367-17382120	0	0	0	0	0	0	0	0	0	0	0	0	0	0	0	0	0	0
ENSG00000132182	NUP210	nucleoporin 210kDa [Source:HGNC Symbol;Acc:HGNC:30052]	3:13316235-13420309	76.3948	86.685	88.6335	99.9376	99.1302	94.8509	93.6581	92.3458	86.2311	14209	18414	17173	20161	21182	17437	16872	16496	15394
ENSG00000267450	OR1AB1P	olfactory receptor family 1 subfamily AB member 1 pseudogene [Source:HGNC Symbol;Acc:HGNC:15390]	19:16051929-16052689	0	0	0	0	0	0	0	0	0	0	0	0	0	0	0	0	0	0
ENSG00000237999	ACTG1P19	actin gamma 1 pseudogene 19 [Source:HGNC Symbol;Acc:HGNC:51499]	9:100731240-100732355	0	0	0.0411694	0	0.0373312	0	0.0442972	0	0	0	0	1	0	1	0	1	0	0
ENSG00000116991	SIPA1L2	signal-induced proliferation-associated 1 like 2 [Source:HGNC Symbol;Acc:HGNC:23800]	1:232397965-232561558	0	0.00710754	0.0038953	0.0187121	0	0.00410613	0	0.00422683	0	0	2	1	5	0	1	0	1	0
ENSG00000237994	RP1-146A15.1	-	X:28942050-28942568	0	0	0	0	0	0	0	0	0	0	0	0	0	0	0	0	0	0
ENSG00000150681	RGS18	regulator of G-protein signaling 18 [Source:HGNC Symbol;Acc:HGNC:14261]	1:192158457-192185815	0.013585	0.190392	0.0782748	0.0250543	0.0236629	0.0274946	0.0280645	0.0424542	0	1	16	6	2	2	2	2	3	0
ENSG00000237990	CNTN4-AS1	CNTN4 antisense RNA 1 [Source:HGNC Symbol;Acc:HGNC:39985]	3:3039033-3069242	0	0	0	0	0	0	0	0	0	0	0	0	0	0	0	0	0	0
ENSG00000237991	RPL35P1	ribosomal protein L35 pseudogene 1 [Source:HGNC Symbol;Acc:HGNC:36695]	1:236981339-236981708	37.914	32.8569	26.5827	29.2291	26.9196	30.635	24.3154	29.1021	31.4123	293	290	214	245	239	234	182	216	233
ENSG00000237992	AC010096.2	-	2:19475450-19488850	0	0	0	0	0	0	0	0	0	0	0	0	0	0	0	0	0	0
ENSG00000237993	RP11-159M11.2	-	1:116013813-116017705	0	0	0	0	0	0	0	0	0	0	0	0	0	0	0	0	0	0
ENSG00000244249	RP11-441M10.1	-	3:159386756-159387440	0	0	0	0	0	0	0	0	0	0	0	0	0	0	0	0	0	0
ENSG00000014919	COX15	cytochrome c oxidase assembly homolog 15 (yeast) [Source:HGNC Symbol;Acc:HGNC:2263]	10:99711844-99732100	11.5245	12.5147	11.6114	12.4687	12.2882	12.449	13.4868	14.1843	13.5522	1049	1301	1101	1231	1285	1120	1189	1240	1184
ENSG00000188029	CTSL3P	cathepsin L family member 3, pseudogene [Source:HGNC Symbol;Acc:HGNC:33132]	9:87772453-87786884	0	0	0	0	0	0	0	0	0	0	0	0	0	0	0	0	0	0
ENSG00000267456	RP11-49I11.3	-	18:36278735-36279119	0	0	0	0	0	0	0	0	0	0	0	0	0	0	0	0	0	0
ENSG00000244247	RP11-139K4.2	-	3:182498264-182507124	0	0	0	0	0	0	0	0	0	0	0	0	0	0	0	0	0	0
ENSG00000131981	LGALS3	lectin, galactoside-binding, soluble, 3 [Source:HGNC Symbol;Acc:HGNC:6563]	14:55124110-55145413	0.359292	0.223251	0.456158	0.534276	0.282473	0.316595	0.634215	0.458571	0.350175	31	22	41	50	28	27	53	38	29
ENSG00000131982	UBE2L2	ubiquitin conjugating enzyme E2L 2 (pseudogene) [Source:HGNC Symbol;Acc:HGNC:12487]	12:20449655-20450083	0.111562	0.0977079	0.214303	0.205749	0.0971134	0.112895	0.115235	0.116213	0.232533	1	1	2	2	1	1	1	1	2
ENSG00000188026	RILPL1	Rab interacting lysosomal protein-like 1 [Source:HGNC Symbol;Acc:HGNC:26814]	12:123470054-123533718	3.1469	2.97185	2.76915	3.09477	2.59571	2.97159	2.54512	2.37942	2.93517	420	453	385	448	398	392	329	305	376
ENSG00000225640	RP5-1022P6.4	-	20:5507875-5510002	0	0	0	0	0	0	0	0	0	0	0	0	0	0	0	0	0	0
ENSG00000273946	RN7SL733P	RNA, 7SL, cytoplasmic 733, pseudogene [Source:HGNC Symbol;Acc:HGNC:46749]	10:87154041-87154369	0	0	0	0	0	0	0	0	0	0	0	0	0	0	0	0	0	0
ENSG00000166337	TAF10	TATA-box binding protein associated factor 10 [Source:HGNC Symbol;Acc:HGNC:11543]	11:6606296-6612667	6.69051	5.77047	5.45021	5.79949	5.79648	5.7885	5.56495	6.36075	5.98692	1070	1054	908	1006	1065	915	862	977	919
ENSG00000240747	KRBOX1	KRAB box domain containing 1 [Source:HGNC Symbol;Acc:HGNC:38708]	3:42809483-42942792	0.281297	0.23399	0.36455	0.311226	0.134678	0.369983	0.304965	0.292893	0.337045	20	19	27	24	11	26	21	20	23
ENSG00000272097	RP11-421M1.8	-	6:10743324-10747663	0.333324	0.34491	0.145454	0.167622	0.131893	0.306593	0.406718	0.378617	0.410423	11	13	5	6	5	10	13	12	13
ENSG00000272094	RP4-665J23.4	-	1:90860550-90862920	0.108951	0.333855	0.156861	0.401766	0.42671	0.385747	0.168722	0.226873	0.340466	2	7	3	8	9	7	3	4	6
ENSG00000272092	RP11-350N15.5	-	8:38382364-38383461	0.392426	0.152702	0.292994	0.160816	0.303658	0.441181	0.450189	0.272388	0.227132	9	4	7	4	8	10	10	6	5
ENSG00000084652	TXLNA	taxilin alpha [Source:HGNC Symbol;Acc:HGNC:30685]	1:32179686-32198285	30.718	33.5983	34.3318	33.381	33.9904	35.2523	32.3585	34.1174	31.3551	3403	4251	3962	4011	4326	3860	3472	3630	3334
ENSG00000214691	AC104654.1	-	2:41877074-41894046	0	0	0	0	0	0	0	0	0	0	0	0	0	0	0	0	0	0
ENSG00000214694	ARHGEF33	Rho guanine nucleotide exchange factor 33 [Source:HGNC Symbol;Acc:HGNC:37252]	2:38889880-38975449	0	0.0190401	0.0313152	0.0100234	0.0189289	0.0109997	0	0.0169846	0.00566412	0	4	6	2	4	2	0	3	1
ENSG00000214695	NPAP1P2	nuclear pore associated protein 1 pseudogene 2 [Source:HGNC Symbol;Acc:HGNC:45019]	10:79860573-79861806	0	0	0	0	0	0	0	0	0	0	0	0	0	0	0	0	0	0
ENSG00000172167	MTBP	MDM2 binding protein [Source:HGNC Symbol;Acc:HGNC:7417]	8:120445400-120542133	2.10569	2.56164	2.10055	2.0398	2.32699	2.60166	2.47964	2.78858	2.55275	434	603	451	456	551	530	495	552	505
ENSG00000230485	AC000077.2	-	22:19630750-19633574	0	0	0	0	0	0	0	0	0	0	0	0	0	0	0	0	0	0
ENSG00000172164	SNTB1	syntrophin, beta 1 (dystrophin-associated protein A1, 59kDa, basic component 1) [Source:HGNC Symbol;Acc:HGNC:11168]	8:120535745-120813273	0	0	0.00531956	0	0	0	0.00572371	0	0.0115499	0	0	1	0	0	0	1	0	2
ENSG00000230483	AC124057.5	-	11:2404515-2407908	0	0	0	0	0	0	0	0	0	0	0	0	0	0	0	0	0	0
ENSG00000230480	AC093142.2	-	3:28447725-28448073	0	0	0.131648	0	0	0	0	0	0	0	0	1	0	0	0	0	0	0
ENSG00000260592	CTA-363E6.6	-	16:19476916-19487899	1.21018	2.38415	1.74257	2.71966	1.77762	3.36705	2.03038	2.99266	2.99451	16	36	24	39	27	44	26	38	38
ENSG00000174576	NPAS4	neuronal PAS domain protein 4 [Source:HGNC Symbol;Acc:HGNC:18983]	11:66421004-66426707	0	0	0	0	0	0	0	0	0	0	0	0	0	0	0	0	0	0
ENSG00000214342	ATP5F1P2	ATP synthase, H+ transporting, mitochondrial Fo complex subunit B1 pseudogene 2 [Source:HGNC Symbol;Acc:HGNC:39743]	7:94738652-94739411	0	0	0	0	0	0	0	0	0	0	0	0	0	0	0	0	0	0
ENSG00000148386	LCN9	lipocalin 9 [Source:HGNC Symbol;Acc:HGNC:17442]	9:135663322-135666422	0	0	0	0	0	0	0	0	0	0	0	0	0	0	0	0	0	0
ENSG00000214347	CTB-180A7.8	-	19:6393809-6412404	0	0	0	0	0	0	0	0	0	0	0	0	0	0	0	0	0	0
ENSG00000214344	OR4F13P	olfactory receptor family 4 subfamily F member 13 pseudogene [Source:HGNC Symbol;Acc:HGNC:15076]	15:101842119-101850324	0	0	0	0	0	0	0	0	0	0	0	0	0	0	0	0	0	0
ENSG00000020426	MNAT1	MNAT CDK-activating kinase assembly factor 1 [Source:HGNC Symbol;Acc:HGNC:7181]	14:60734742-60969953	5.81926	4.58641	4.54802	4.86662	5.04425	5.12817	5.18325	5.47922	5.08746	721	649	587	654	718	628	622	652	605
ENSG00000233440	HMGA1P6	high mobility group AT-hook 1 pseudogene 6 [Source:HGNC Symbol;Acc:HGNC:19121]	13:23134174-23134564	0	0	0.117507	0	0	0	0	0.127508	0	0	0	1	0	0	0	0	1	0
ENSG00000204959	ARHGEF34P	Rho guanine nucleotide exchange factor 34, pseudogene [Source:HGNC Symbol;Acc:HGNC:38086]	7:144272445-144286966	0	0	0	0.0194763	0	0	0.0109081	0.0220015	0	0	0	0	2	0	0	1	2	0
ENSG00000233441	CYP2AB1P	cytochrome P450 family 2 subfamily AB member 1, pseudogene [Source:HGNC Symbol;Acc:HGNC:39975]	3:183895900-183910936	0	0	0	0	0	0	0	0	0	0	0	0	0	0	0	0	0	0
ENSG00000064932	SBNO2	strawberry notch homolog 2 (Drosophila) [Source:HGNC Symbol;Acc:HGNC:29158]	19:1107636-1174283	7.12541	7.60501	8.03122	7.01335	7.28633	7.83208	7.56235	6.98037	7.39961	1539	1876	1807	1643	1808	1672	1582	1448	1534
ENSG00000229154	KCNQ5-AS1	KCNQ5 antisense RNA 1 [Source:HGNC Symbol;Acc:HGNC:40323]	6:73134803-73143514	0	0	0	0	0	0	0	0	0	0	0	0	0	0	0	0	0	0
ENSG00000101871	MID1	midline 1 [Source:HGNC Symbol;Acc:HGNC:7095]	X:10445310-10833654	0.117515	0.172287	0.228241	0.173857	0.152244	0.152074	0.160833	0.165042	0.19077	43	72	87	69	64	55	57	58	67
ENSG00000138115	CYP2C8	cytochrome P450 family 2 subfamily C member 8 [Source:HGNC Symbol;Acc:HGNC:2622]	10:95036772-95069497	0.015182	0.01329	0	0	0	0	0.015674	0	0	2	2	0	0	0	0	2	0	0
ENSG00000138111	MFSD13A	major facilitator superfamily domain containing 13A [Source:HGNC Symbol;Acc:HGNC:26196]	10:102461395-102477045	4.00332	3.35326	4.12069	4.13896	3.71629	3.8162	3.48824	2.98767	3.89367	346	331	371	388	369	326	292	248	323
ENSG00000172789	HOXC5	homeobox C5 [Source:HGNC Symbol;Acc:HGNC:5127]	12:54032853-54035358	0.238717	0.0928902	0.0254543	0.489107	0.230881	0.456226	0.547736	0.331421	0.469796	9	4	1	20	10	17	20	12	17
ENSG00000275475	IGHV3-54	immunoglobulin heavy variable 3-54 (pseudogene) [Source:HGNC Symbol;Acc:HGNC:5611]	14:106601346-106601792	0	0	0	0	0	0	0	0	0	0	0	0	0	0	0	0	0	0
ENSG00000172785	CBWD1	COBW domain containing 1 [Source:HGNC Symbol;Acc:HGNC:17134]	9:121038-179147	0.91865	0.980744	0.957674	0.890059	0.799631	0.828339	0.948482	0.951473	0.911774	570	695	619	599	570	508	570	567	543
ENSG00000275476	RP11-996F15.4	-	12:29277397-29277882	0	0	0	0.0908091	0	0.0996539	0.406878	0.205166	0	0	0	0	1	0	1	4	2	0
ENSG00000138119	MYOF	myoferlin [Source:HGNC Symbol;Acc:HGNC:3656]	10:93306429-93482317	0.0099437	0.0130568	0.00477054	0.00916482	0.0173074	0.0201201	0.0153989	0	0	2	3	1	2	4	4	3	0	0
ENSG00000172780	RAB43	RAB43, member RAS oncogene family [Source:HGNC Symbol;Acc:HGNC:19983]	3:129087569-129122801	1.24847	0.746108	1.24286	1.34594	1.29371	0.902231	1.32993	0.887244	1.42462	189	129	196	221	225	135	195	129	207
ENSG00000150201	FXYD4	FXYD domain containing ion transport regulator 4 [Source:HGNC Symbol;Acc:HGNC:4028]	10:43371642-43376335	0.101576	0.118576	0.032493	0.280966	0.0884202	0	0.0699231	0	0	3	4	1	9	3	0	2	0	0
ENSG00000144724	PTPRG	protein tyrosine phosphatase, receptor type, G [Source:HGNC Symbol;Acc:HGNC:9671]	3:61561569-62297613	0	0	0	0	0	0	0	0.00267867	0	0	0	0	0	0	0	0	1	0
ENSG00000156689	GLYATL2	glycine-N-acyltransferase like 2 [Source:HGNC Symbol;Acc:HGNC:24178]	11:58834065-58904215	0	0	0	0	0	0	0	0	0	0	0	0	0	0	0	0	0	0
ENSG00000271547	RP11-579D7.8	-	12:48800576-48801086	0	0	0	0	0	0	0	0.0975645	0	0	0	0	0	0	0	0	1	0
ENSG00000271546	RP4-725K1.1	-	1:148795797-148796325	0	0	0	0	0	0	0	0	0	0	0	0	0	0	0	0	0	0
ENSG00000271543	RP11-692M12.5	-	11:47796169-47796379	0	0	0	0	0	0	0	0	0	0	0	0	0	0	0	0	0	0
ENSG00000236119	AP000688.15	-	21:36082859-36090414	0	0	0	0	0	0	0	0	0	0	0	0	0	0	0	0	0	0
ENSG00000236118	LL22NC03-30E12.10	-	22:22155582-22155942	0	0	0	0	0	0	0	0	0	0	0	0	0	0	0	0	0	0
ENSG00000236111	RP11-630I5.1	-	1:45781277-45781957	0.843629	0.67713	0.33747	0.648193	0.795545	0.782449	0.798448	0.732018	0.805744	12	11	5	10	13	11	11	10	11
ENSG00000236110	OR2AM1P	olfactory receptor family 2 subfamily AM member 1 pseudogene [Source:HGNC Symbol;Acc:HGNC:15113]	9:36021692-36022113	0	0	0	0	0	0	0	0	0	0	0	0	0	0	0	0	0	0
ENSG00000236117	RP4-754E20__A.5	-	22:43400331-43409681	0	0	0	0	0	0	0	0	0	0	0	0	0	0	0	0	0	0
ENSG00000236116	AC064853.2	-	2:227616998-227617790	0	0	0	0	0	0	0	0	0	0	0	0	0	0	0	0	0	0
ENSG00000236115	RP11-62C3.6	-	9:92205356-92210158	0	0	0	0	0	0	0	0	0	0	0	0	0	0	0	0	0	0
ENSG00000236114	RP11-517P14.7	-	10:43523256-43525217	0	0	0	0	0	0	0.0251966	0	0	0	0	0	0	0	0	1	0	0
ENSG00000196924	FLNA	filamin A [Source:HGNC Symbol;Acc:HGNC:3754]	X:154348524-154374638	35.6491	40.0547	39.7106	41.4724	41.4576	38.784	38.3685	38.3116	36.5106	13716	17601	15916	17307	18325	14749	14298	14157	13483
ENSG00000224922	AL050303.7	-	21:13769932-13771740	0	0	0	0	0	0	0	0	0	0	0	0	0	0	0	0	0	0
ENSG00000224924	LINC00320	long intergenic non-protein coding RNA 320 [Source:HGNC Symbol;Acc:HGNC:19690]	21:20742590-20803216	0	0	0	0	0	0	0	0	0	0	0	0	0	0	0	0	0	0
ENSG00000196923	PDLIM7	PDZ and LIM domain 7 [Source:HGNC Symbol;Acc:HGNC:22958]	5:177483394-177497606	10.702	11.1785	10.6724	10.698	11.3411	11.5586	9.49839	10.4707	11.1767	1674	1997	1739	1815	2038	1787	1439	1573	1678
ENSG00000196922	ZNF252P	zinc finger protein 252, pseudogene [Source:HGNC Symbol;Acc:HGNC:13046]	8:144973589-145002895	0.545092	0.77727	0.67875	1.0884	0.704928	1.15025	1.087	1.05727	1.27862	175	285	227	379	260	365	338	326	394
ENSG00000174780	SRP72	signal recognition particle 72kDa [Source:HGNC Symbol;Acc:HGNC:11303]	4:56466915-56503680	42.8621	45.6984	43.6884	40.193	44.1548	44.7021	45.7086	44.6023	44.6827	6845	8335	7268	6962	8101	7056	7070	6841	6849
ENSG00000260596	DUX4	double homeobox 4 [Source:HGNC Symbol;Acc:HGNC:50800]	4:190173774-190185942	0	0	0	0	0	0	0	0	0	0	0	0	0	0	0	0	0	0
ENSG00000232314	PSMC1P13	proteasome (prosome, macropain) 26S subunit, ATPase, 1 pseudogene 13 [Source:HGNC Symbol;Acc:HGNC:39788]	13:69894101-69895085	0	0	0	0	0	0	0	0	0	0	0	0	0	0	0	0	0	0
ENSG00000265579	RP11-713C5.1	-	18:72743756-72745961	0	0	0	0	0	0	0	0	0	0	0	0	0	0	0	0	0	0
ENSG00000260597	AC012531.25	-	12:54019910-54022589	0.464492	0.688247	0.617378	0.757656	0.870819	0.686829	0.959144	0.558027	0.483931	26	44	36	46	56	38	52	30	26
ENSG00000265574	WDR45BP1	WD repeat domain 45B pseudogene 1 [Source:HGNC Symbol;Acc:HGNC:26605]	17:32111562-32112590	0.13958	0.203677	0.089345	0.214489	0.0810151	0.470764	0.19217	0.242252	0.0969452	3	5	2	5	2	10	4	5	2
ENSG00000173786	CNP	2',3'-cyclic nucleotide 3' phosphodiesterase [Source:HGNC Symbol;Acc:HGNC:2158]	17:41966741-41977731	4.85856	4.00614	4.70108	3.26614	5.44741	3.4507	4.88013	4.79077	4.75357	1510	1422	1522	1101	1945	1060	1469	1430	1418
ENSG00000117877	CD3EAP	CD3e molecule, epsilon associated protein [Source:HGNC Symbol;Acc:HGNC:24219]	19:45406209-45410766	5.11508	5.06982	5.10752	5.21664	5.27003	6.07355	6.67536	8.49695	5.36746	697	789	725	771	825	818	881	1112	702
ENSG00000233693	RP11-506O24.1	-	1:164769116-164774641	0	0	0	0	0	0	0	0	0	0	0	0	0	0	0	0	0	0
ENSG00000233691	RP11-312J18.7	-	1:160935537-160936126	0	0	0	0	0	0	0	0	0	0	0	0	0	0	0	0	0	0
ENSG00000181803	OR6S1	olfactory receptor family 6 subfamily S member 1 [Source:HGNC Symbol;Acc:HGNC:15363]	14:20640696-20641691	0	0	0	0	0	0	0	0	0	0	0	0	0	0	0	0	0	0
ENSG00000235029	MNX1-AS2	MNX1 antisense RNA 2 [Source:HGNC Symbol;Acc:HGNC:40278]	7:157006307-157007132	0	0	0.245818	0.354126	0	0.647615	0	0	0	0	0	2	3	0	5	0	0	0
ENSG00000233699	TTTY18	testis-specific transcript, Y-linked 18 (non-protein coding) [Source:HGNC Symbol;Acc:HGNC:18842]	Y:8683370-8683878	0	0	0	0	0	0	0	0	0	0	0	0	0	0	0	0	0	0
ENSG00000238183	RPS27P5	ribosomal protein S27 pseudogene 5 [Source:HGNC Symbol;Acc:HGNC:36734]	1:226781501-226781744	0	0	0	0	0	0	0	0	0	0	0	0	0	0	0	0	0	0
ENSG00000238180	AC017079.4	-	2:128217588-128218072	0	0	0	0	0	0	0	0	0	0	0	0	0	0	0	0	0	0
ENSG00000232125	DYTN	dystrotelin [Source:HGNC Symbol;Acc:HGNC:23279]	2:206651621-206718396	0	0	0	0	0	0	0	0	0	0	0	0	0	0	0	0	0	0
ENSG00000238186	RP11-656D10.6	-	1:40515754-40517174	0.0876557	0	0	0	0	0	0	0	0	1	0	0	0	0	0	0	0	0
ENSG00000203620	RP11-84A19.2	-	1:31842019-31855568	0	0	0	0	0	0	0	0	0	0	0	0	0	0	0	0	0	0
ENSG00000238184	CD81-AS1	CD81 antisense RNA 1 [Source:HGNC Symbol;Acc:HGNC:49384]	11:2328749-2377992	0.309353	0.159334	0.314438	0.251664	0.237602	0.147284	0.187878	0.208422	0.208556	17	10	18	15	15	8	10	11	11
ENSG00000238185	RP11-252M21.6	-	13:30973289-30977623	0	0	0	0	0	0	0	0	0	0	0	0	0	0	0	0	0	0
ENSG00000238188	RP5-875H3.2	-	X:130645723-130646325	0	0	0	0	0	0	0	0	0	0	0	0	0	0	0	0	0	0
ENSG00000238189	ENOX1-AS2	ENOX1 antisense RNA 2 [Source:HGNC Symbol;Acc:HGNC:42397]	13:43458465-43459484	0	0	0	0	0	0	0	0	0	0	0	0	0	0	0	0	0	0
ENSG00000232128	MTCO3P45	MT-CO3 pseudogene 45 [Source:HGNC Symbol;Acc:HGNC:52148]	2:94900990-94901602	0	0	0	0	0	0	0	0	0	0	0	0	0	0	0	0	0	0
ENSG00000116473	RAP1A	RAP1A, member of RAS oncogene family [Source:HGNC Symbol;Acc:HGNC:9855]	1:111542218-111716691	12.488	11.3111	11.0398	11.0908	10.4586	10.1577	11.4803	11.9301	12.07	1770	1831	1630	1705	1703	1423	1576	1624	1642
ENSG00000112996	MRPS30	mitochondrial ribosomal protein S30 [Source:HGNC Symbol;Acc:HGNC:8769]	5:44808925-44820428	14.9555	16.3822	16.3523	15.7168	17.0099	16.4186	17.9973	17.2051	17.0387	2374	2970	2704	2706	3102	2576	2767	2623	2596
ENSG00000280378	RP4-758J24.6	-	1:54033126-54034880	0.709309	0.406078	0.13095	0.427576	0.28496	0.35881	0.197179	0.198825	0.312656	26	17	5	17	12	13	7	7	11
ENSG00000112992	NNT	nicotinamide nucleotide transhydrogenase [Source:HGNC Symbol;Acc:HGNC:7863]	5:43602692-43707405	8.11288	8.8483	8.07533	9.16097	9.37571	9.23614	10.3769	9.19352	9.28958	2060	2566	2136	2523	2735	2318	2552	2242	2264
ENSG00000116478	HDAC1	histone deacetylase 1 [Source:HGNC Symbol;Acc:HGNC:4852]	1:32292086-32333635	36.4524	34.5794	36.4308	36.6039	37.205	38.1849	36.7435	34.9592	38.5997	4891	5299	5092	5327	5735	5064	4775	4505	4971
ENSG00000215871	RP5-837M10.1	-	1:100331804-100332617	0.0587961	0.102989	0.0564436	0.0542177	0.0511814	0	0.303659	0.0612475	0.0612755	1	2	1	1	1	0	5	1	1
ENSG00000223656	HMGB3P10	high mobility group box 3 pseudogene 10 [Source:HGNC Symbol;Acc:HGNC:39302]	1:99698242-99699178	0	0	0	0	0	0	0	0	0	0	0	0	0	0	0	0	0	0
ENSG00000223657	KRT8P51	keratin 8 pseudogene 51 [Source:HGNC Symbol;Acc:HGNC:48883]	7:136938280-136938553	0	0.152981	0	0	0.15205	0	0	0	0	0	1	0	0	1	0	0	0	0
ENSG00000223655	RAB9AP3	RAB9A, member RAS oncogene family pseudogene 3 [Source:HGNC Symbol;Acc:HGNC:38107]	Y:25918323-25918895	0	0	0	0	0	0	0	0	0	0	0	0	0	0	0	0	0	0
ENSG00000223652	AC106786.1	-	5:123087248-123090299	0	0	0	0	0	0	0	0	0	0	0	0	0	0	0	0	0	0
ENSG00000223653	RP11-131L23.1	-	1:85276715-85448124	0	0	0.058823	0.0376563	0.0355651	0.0413241	0.0632709	0.0212694	0	0	0	3	2	2	2	3	1	0
ENSG00000223650	UHRF2P1	ubiquitin-like with PHD and ring finger domains 2 pseudogene 1 [Source:HGNC Symbol;Acc:HGNC:39565]	X:74105572-74107958	0	0	0	0	0	0	0.0207104	0	0	0	0	0	0	0	0	1	0	0
ENSG00000223651	RP5-1121H13.1	-	20:41997131-41999397	0	0.0184899	0	0	0	0.0213638	0	0	0	0	1	0	0	0	1	0	0	0
ENSG00000274704	Metazoa_SRP	Metazoan signal recognition particle RNA [Source:RFAM;Acc:RF00017]	14:49913493-49913760	0	0	0	0	0	0	0	0	0	0	0	0	0	0	0	0	0	0
ENSG00000252595	RN7SKP82	RNA, 7SK small nuclear pseudogene 82 [Source:HGNC Symbol;Acc:HGNC:45806]	4:42892396-42892618	0	0	0	0	0	0	0	0	0	0	0	0	0	0	0	0	0	0
ENSG00000274701	Metazoa_SRP	Metazoan signal recognition particle RNA [Source:RFAM;Acc:RF00017]	8:94655911-94656208	0	0	0	0	0	0	0	0	0	0	0	0	0	0	0	0	0	0
ENSG00000223658	C1GALT1C1L	C1GALT1-specific chaperone 1 like [Source:HGNC Symbol;Acc:HGNC:51617]	2:43675151-43676322	0.898722	0.894198	1.64704	0.866281	1.60013	0.826607	0.84357	1.19096	0.89381	22	25	42	23	45	20	20	28	21
ENSG00000099866	MADCAM1	mucosal vascular addressin cell adhesion molecule 1 [Source:HGNC Symbol;Acc:HGNC:6765]	19:489176-505342	0.880825	0.682241	0.63416	0.577837	0.751956	0.694076	0.690814	0.767207	0.635333	104	92	78	74	102	81	79	87	72
ENSG00000151150	ANK3	ankyrin 3, node of Ranvier (ankyrin G) [Source:HGNC Symbol;Acc:HGNC:494]	10:60026298-60733490	1.14	1.44765	1.55883	1.14027	1.2224	1.15578	1.07345	1.08745	1.00945	966	1401	1376	1048	1190	968	881	885	821
ENSG00000099864	PALM	paralemmin [Source:HGNC Symbol;Acc:HGNC:8594]	19:708939-748329	1.93295	1.69245	2.92321	2.33596	1.90513	2.13016	2.45628	1.97546	3.20982	325	325	512	426	368	354	400	319	518
ENSG00000270638	RP3-466P17.1	-	6:145735570-145737218	0.232276	0.101678	0.16723	0.240925	0.227458	0.234993	0.149896	0.332541	0.211764	8	4	6	9	9	8	5	11	7
ENSG00000270639	ECM1P1	extracellular matrix protein 1 pseudogene 1 [Source:HGNC Symbol;Acc:HGNC:49736]	9:4768617-4769895	0	0	0	0	0	0	0	0	0	0	0	0	0	0	0	0	0	0
ENSG00000099860	GADD45B	growth arrest and DNA damage inducible beta [Source:HGNC Symbol;Acc:HGNC:4096]	19:2476122-2478259	0.282174	0.223154	0.20097	0.193019	0.174305	0.303896	0.328926	0.27484	0.341401	31	28	23	23	22	33	35	29	36
ENSG00000270634	RP4-777G9.1	-	7:147704294-147704575	0	0	0	0	0	0	0	0	0	0	0	0	0	0	0	0	0	0
ENSG00000218991	CCNG1P1	cyclin G1 pseudogene 1 [Source:HGNC Symbol;Acc:HGNC:39177]	6:132698783-132699667	0	0	0	0	0	0	0.0558595	0	0	0	0	0	0	0	0	1	0	0
ENSG00000218996	RP1-99E18.2	-	6:150934968-150935566	0.239779	0.139956	0.306888	0.221107	0.208725	0.161709	0.412652	0.166462	0.249808	3	2	4	3	3	2	5	2	3
ENSG00000270632	RP11-340C20.3	-	13:100198187-100198469	0	0	0	0	0	0	0	0	0	0	0	0	0	0	0	0	0	0
ENSG00000021488	SLC7A9	solute carrier family 7 (amino acid transporter light chain, bo,+ system), member 9 [Source:HGNC Symbol;Acc:HGNC:11067]	19:32830509-32869766	0	0	0	0	0	0	0	0	0	0	0	0	0	0	0	0	0	0
ENSG00000266179	RP11-1113L8.6	-	17:19600860-19601345	0	0	0	0	0	0	0	0	0	0	0	0	0	0	0	0	0	0
ENSG00000106245	BUD31	BUD31 homolog [Source:HGNC Symbol;Acc:HGNC:29629]	7:99408641-99419616	26.5667	21.6461	23.5541	20.7693	20.954	21.1443	21.5243	22.9511	22.1496	2578	2399	2381	2186	2336	2028	2023	2139	2063
ENSG00000106244	PDAP1	PDGFA associated protein 1 [Source:HGNC Symbol;Acc:HGNC:14634]	7:99392048-99408829	73.2121	69.9349	70.0734	60.3765	74.7587	66.5555	71.8867	71.4702	75.7154	5430	5924	5414	4857	6370	4879	5164	5091	5390
ENSG00000072210	ALDH3A2	aldehyde dehydrogenase 3 family member A2 [Source:HGNC Symbol;Acc:HGNC:403]	17:19648136-19677598	0	0.0020007	0	0	0.00198853	0.00693501	0	0.00951848	0.00238071	0	1	0	0	1	3	0	4	1
ENSG00000166484	MAPK7	mitogen-activated protein kinase 7 [Source:HGNC Symbol;Acc:HGNC:6880]	17:19377721-19383544	0.364365	0.377735	0.542853	0.451496	0.461784	0.389289	0.364159	0.339927	0.425176	125	148	194	168	182	132	121	112	140
ENSG00000266171	RP11-769O8.1	-	18:735746-737459	0	0	0	0	0	0	0	0	0	0	0	0	0	0	0	0	0	0
ENSG00000269300	CTD-2529P6.3	-	19:8821501-8824110	0	0	0	0	0	0	0	0	0	0	0	0	0	0	0	0	0	0
ENSG00000266173	STRADA	STE20-related kinase adaptor alpha [Source:HGNC Symbol;Acc:HGNC:30172]	17:63702832-63741970	1.41272	1.06092	1.60391	1.27995	1.13983	1.22866	1.24262	1.27859	1.08975	520	446	615	511	482	447	443	452	385
ENSG00000269307	CTD-2278I10.6	-	19:17267418-17282966	0	1.70184	0	0	0	0	0	0	0	0	49	0	0	0	0	0	0	0
ENSG00000266176	RP11-855A2.5	-	17:67993880-67996431	0	0	0	0	0	0	0	0	0	0	0	0	0	0	0	0	0	0
ENSG00000100836	PABPN1	poly(A) binding protein, nuclear 1 [Source:HGNC Symbol;Acc:HGNC:8565]	14:23321289-23326185	19.3402	17.9385	18.3146	18.5985	19.184	20.1567	17.6049	18.9982	18.5518	3253	3446	3209	3393	3707	3351	2868	3069	2995
ENSG00000236809	SNX25P1	sorting nexin 25 pseudogene 1 [Source:HGNC Symbol;Acc:HGNC:41509]	1:211417025-211417934	0.0573861	0.10052	0	0.0529175	0	0.0580717	0.177826	0	0.239224	1	2	0	1	0	1	3	0	4
ENSG00000236801	RPL24P8	ribosomal protein L24 pseudogene 8 [Source:HGNC Symbol;Acc:HGNC:36409]	9:70217195-70217668	9.19174	7.34054	7.27221	6.33263	7.20955	8.5843	6.77873	7.2568	8.83993	91	83	75	68	82	84	65	69	84
ENSG00000236800	RP11-534L6.2	-	10:48664199-48672424	0	0	0	0	0	0	0	0	0	0	0	0	0	0	0	0	0	0
ENSG00000236803	SDAD1P4	SDA1 domain containing 1 pseudogene 4 [Source:HGNC Symbol;Acc:HGNC:39261]	13:23267506-23269150	0	0	0	0	0	0	0	0	0	0	0	0	0	0	0	0	0	0
ENSG00000236804	RPS3AP12	ribosomal protein S3a pseudogene 12 [Source:HGNC Symbol;Acc:HGNC:35527]	1:119126539-119127291	0	0.0556663	0.061016	0	0	0	0	0	0	0	1	1	0	0	0	0	0	0
ENSG00000236807	AC092066.6	-	19:44765148-44765464	0	0	0	0	0	0	0	0	0	0	0	0	0	0	0	0	0	0
ENSG00000236806	RPL7AP15	ribosomal protein L7a pseudogene 15 [Source:HGNC Symbol;Acc:HGNC:36873]	1:147223554-147224348	0	0	0	0	0	0.0609205	0	0	0	0	0	0	0	0	1	0	0	0
ENSG00000230197	RP11-160E2.17	-	17:19077775-19087878	0	0	0	0	0	0	0	0	0	0	0	0	0	0	0	0	0	0
ENSG00000243694	RP11-6B4.1	-	3:80993868-81095647	0	0	0	0	0	0	0	0	0	0	0	0	0	0	0	0	0	0
ENSG00000228367	RP11-524L6.2	-	5:75920670-75921660	0	0.0422974	0	0	0	0	0	0	0	0	1	0	0	0	0	0	0	0
ENSG00000153790	C7orf31	chromosome 7 open reading frame 31 [Source:HGNC Symbol;Acc:HGNC:21722]	7:25134697-25180356	1.33908	1.08333	1.32304	1.39342	1.28828	0.926963	1.33405	1.10073	1.15038	171	158	176	193	189	117	165	135	141
ENSG00000228125	AKIRIN1P2	akirin 1 pseudogene 2 [Source:HGNC Symbol;Acc:HGNC:50797]	X:68132868-68133437	0	0	0.161291	0.0774267	0	0.0849681	0	0.262397	0	0	0	2	1	0	1	0	3	0
ENSG00000228124	RP1-122O8.7	-	6:89673469-89675783	0	0	0	0.0935026	0.0882662	0	0	0	0	0	0	0	1	1	0	0	0	0
ENSG00000228127	RP11-12L8.1	-	1:115919350-115931561	0	0	0	0	0	0	0	0	0	0	0	0	0	0	0	0	0	0
ENSG00000250877	RP11-373J21.1	-	4:72323028-72330751	0	0	0	0	0	0	0	0	0	0	0	0	0	0	0	0	0	0
ENSG00000228121	PHBP3	prohibitin pseudogene 3 [Source:HGNC Symbol;Acc:HGNC:8915]	1:58999676-59000494	0.0584371	0.0511803	0.056099	0	0.0508689	0.0591353	0	0.0608736	0.0609014	1	1	1	0	1	1	0	1	1
ENSG00000228120	AP001631.10	-	21:43159066-43162277	0	0	0	0	0	0	0	0	0	0	0	0	0	0	0	0	0	0
ENSG00000228123	RP11-15B24.3	-	9:82431889-82432905	0	0	0	0	0	0	0	0	0	0	0	0	0	0	0	0	0	0
ENSG00000228122	MTND1P17	mitochondrially encoded NADH:ubiquinone oxidoreductase core subunit 1 pseudogene 17 [Source:HGNC Symbol;Acc:HGNC:42095]	22:16876218-16876421	0	0	0	0	0	0	0	0	0	0	0	0	0	0	0	0	0	0
ENSG00000243695	RP11-290L7.3	-	9:39173794-39174513	0	0	0.0638126	0	0	0	0	0	0	0	0	1	0	0	0	0	0	0
ENSG00000234409	CCDC188	coiled-coil domain containing 188 [Source:HGNC Symbol;Acc:HGNC:51899]	22:20148427-20151065	0.0512127	0	0	0	0	0	0	0	0	2	0	0	0	0	0	0	0	0
ENSG00000142765	SYTL1	synaptotagmin like 1 [Source:HGNC Symbol;Acc:HGNC:15584]	1:27342020-27353937	0.7337	0.776073	0.685414	0.522094	0.604355	0.533075	0.467735	0.774192	0.600248	149	180	145	115	141	107	92	151	117
ENSG00000250878	METTL21EP	methyltransferase like 21E, pseudogene [Source:HGNC Symbol;Acc:HGNC:41948]	13:102880099-102896033	0	0	0	0	0	0	0	0	0	0	0	0	0	0	0	0	0	0
ENSG00000113643	RARS	arginyl-tRNA synthetase [Source:HGNC Symbol;Acc:HGNC:9870]	5:168486445-168519299	34.4309	28.649	29.288	28.436	28.3842	26.1708	26.3347	30.4093	30.4767	3723	3538	3299	3335	3526	2797	2758	3158	3163
ENSG00000113645	WWC1	WW and C2 domain containing 1 [Source:HGNC Symbol;Acc:HGNC:29435]	5:168291651-168472303	0.0120078	0	0.0172924	0.00830521	0.0156802	0.0060741	0.0186	0	0	4	0	6	3	6	2	6	0	0
ENSG00000113649	TCERG1	transcription elongation regulator 1 [Source:HGNC Symbol;Acc:HGNC:15630]	5:146447311-146511961	19.3037	23.3179	22.4126	21.1054	20.8949	22.4317	20.6026	21.3583	21.2409	5843	8061	7067	6929	7266	6711	6040	6209	6171
ENSG00000113648	H2AFY	H2A histone family member Y [Source:HGNC Symbol;Acc:HGNC:4740]	5:135333900-135399914	7.0558	8.54415	9.66435	7.62299	8.40581	8.59501	8.64848	8.84354	8.11017	4039	5586	5763	4733	5528	4863	4795	4862	4456
ENSG00000224857	RP11-344P13.1	-	1:121573946-121580524	0	0	0	0	0	0	0	0	0	0	0	0	0	0	0	0	0	0
ENSG00000169432	SCN9A	sodium channel, voltage gated, type IX alpha subunit [Source:HGNC Symbol;Acc:HGNC:10597]	2:166195185-166375993	0.595728	0.716306	0.674652	0.539117	0.532883	0.555503	0.413828	0.454487	0.394711	217	298	256	213	223	200	146	159	138
ENSG00000169435	RASSF6	Ras association (RalGDS/AF-6) domain family member 6 [Source:HGNC Symbol;Acc:HGNC:20796]	4:73571550-73620631	0.100204	0.121482	0.166483	0.0604037	0.0905768	0.171564	0.075604	0.116369	0.056214	26	36	45	17	27	44	19	29	14
ENSG00000264769	RP11-498C9.12	-	17:81922899-81924511	0.34012	0	0.408201	0.392024	0.148072	0	0	0	0	4	0	5	5	2	0	0	0	0
ENSG00000169436	COL22A1	collagen, type XXII, alpha 1 [Source:HGNC Symbol;Acc:HGNC:22989]	8:138588235-138914006	0	0	0	0	0	0	0	0	0	0	0	0	0	0	0	0	0	0
ENSG00000169439	SDC2	syndecan 2 [Source:HGNC Symbol;Acc:HGNC:10659]	8:96493351-96611780	0.202896	0.285321	0.301012	0.221079	0.235481	0.192838	0.304708	0.236869	0.14093	33	53	51	39	44	31	48	37	22
ENSG00000260419	RP11-1437A8.3	-	16:33191561-33195354	0	0	0	0	0	0	0	0	0	0	0	0	0	0	0	0	0	0
ENSG00000264765	RP11-92B11.4	-	17:16653904-16654787	0	0	0	0	0	0	0	0	0	0	0	0	0	0	0	0	0	0
ENSG00000260418	RP3-406A7.7	-	6:136335714-136336087	0.127968	0.224153	0	0.118003	0.111395	0.129497	0	0.266607	0	1	2	0	1	1	1	0	2	0
ENSG00000241229	RN7SL443P	RNA, 7SL, cytoplasmic 443, pseudogene [Source:HGNC Symbol;Acc:HGNC:46459]	20:44007248-44007537	0	0	0	0	0	0	0	0	0	0	0	0	0	0	0	0	0	0
ENSG00000189030	VHLL	von Hippel-Lindau tumor suppressor-like [Source:HGNC Symbol;Acc:HGNC:30666]	1:156298624-156299299	0	0	0	0	0	0	0	0	0	0	0	0	0	0	0	0	0	0
ENSG00000189037	DUSP21	dual specificity phosphatase 21 [Source:HGNC Symbol;Acc:HGNC:20476]	X:44844004-44844888	3.51644	3.45786	3.58335	5.73595	6.1217	4.59769	5.75314	6.98477	8.11642	65	73	69	115	130	84	103	124	144
ENSG00000262089	RP11-589P10.5	-	17:6994642-6995189	0.977153	1.83321	1.07201	2.4452	1.45803	0.988547	0.576509	2.03477	2.32683	7	15	8	19	12	7	4	14	16
ENSG00000215029	TCP11X2	t-complex 11 family, X-linked 2 [Source:HGNC Symbol;Acc:HGNC:48335]	X:102374628-102471812	0	0	0	0	0	0	0	0	0	0	0	0	0	0	0	0	0	0
ENSG00000111644	ACRBP	acrosin binding protein [Source:HGNC Symbol;Acc:HGNC:17195]	12:6638075-6647460	1.22763	0.90718	0.676994	0.955246	1.05342	0.775184	0.85399	1.14224	1.04318	141	119	81	119	139	88	95	126	115
ENSG00000111647	UHRF1BP1L	UHRF1 binding protein 1-like [Source:HGNC Symbol;Acc:HGNC:29102]	12:100028455-100142848	4.74807	5.53804	5.44743	4.90819	4.44852	5.26964	5.22907	4.96171	4.79095	825	1099	986	925	888	905	880	828	799
ENSG00000111641	NOP2	NOP2 nucleolar protein [Source:HGNC Symbol;Acc:HGNC:7867]	12:6556863-6568691	5.53684	4.5399	4.06586	3.87977	5.58954	4.73444	4.40827	5.23155	4.45905	1621	1518	1240	1232	1880	1370	1250	1471	1253
ENSG00000111640	GAPDH	glyceraldehyde-3-phosphate dehydrogenase [Source:HGNC Symbol;Acc:HGNC:4141]	12:6533927-6538374	363.357	384.298	344.931	420.797	394.306	348.533	412.388	396.109	397.081	52457	63364	51874	65891	65398	49733	57663	54922	55022
ENSG00000111642	CHD4	chromodomain helicase DNA binding protein 4 [Source:HGNC Symbol;Acc:HGNC:1919]	12:6570083-6607476	35.5803	40.5707	38.9111	39.9005	41.3559	37.3944	38.7764	38.7187	38.8274	8353	10878	9516	10160	11154	8677	8817	8730	8749
ENSG00000267227	RP11-640I15.2	-	17:15748703-15749315	0	0	0	0	0	0	0	0	0	0	0	0	0	0	0	0	0	0
ENSG00000267226	RP11-126O1.5	-	18:58670009-58671877	0.0792124	0	0	0	0	0.0801188	0	0.0824738	0	2	0	0	0	0	2	0	2	0
ENSG00000267225	WDR7-OT1	WDR7 overlapping transcript 1 [Source:HGNC Symbol;Acc:HGNC:45131]	18:57027832-57038845	0	0.0741888	0	0	0	0	0	0	0	0	1	0	0	0	0	0	0	0
ENSG00000267224	AC005498.4	-	19:56535299-56535763	0	0	0	0	0	0	0	0	0	0	0	0	0	0	0	0	0	0
ENSG00000267223	AC005597.1	-	19:30219666-30228715	0	0	0	0	0	0	0	0	0	0	0	0	0	0	0	0	0	0
ENSG00000267222	RP11-194N12.2	-	17:42495867-42496550	0.490005	0	0.0671711	0.322675	0.243696	0.141613	0.144549	0.218664	0	7	0	1	5	4	2	2	3	0
ENSG00000103569	AQP9	aquaporin 9 [Source:HGNC Symbol;Acc:HGNC:643]	15:58138169-58185911	0.0146099	0.0575579	0.0210345	0	0.0127177	0.0517272	0.0150833	0.0836551	0	2	9	3	0	2	7	2	11	0
ENSG00000267220	CTC-260E6.9	-	19:20131894-20151908	0	0	0	0	0	0	0	0	0	0	0	0	0	0	0	0	0	0
ENSG00000142494	SLC47A1	solute carrier family 47 (multidrug and toxin extrusion), member 1 [Source:HGNC Symbol;Acc:HGNC:25588]	17:19495385-19579034	0	0	0	0	0	0	0	0.00413738	0	0	0	0	0	0	0	0	1	0
ENSG00000215325	ASS1P10	argininosuccinate synthetase 1 pseudogene 10 [Source:HGNC Symbol;Acc:HGNC:760]	5:145228811-145230054	0	0	0	0	0	0	0	0	0	0	0	0	0	0	0	0	0	0
ENSG00000267228	RP11-49K24.6	-	18:47134656-47176281	0	0	0	0	0	0	0.0615637	0	0	0	0	0	0	0	0	1	0	0
ENSG00000254016	ALG1L10P	asparagine-linked glycosylation 1-like 10, pseudogene [Source:HGNC Symbol;Acc:HGNC:44379]	12:8227734-8231764	0	0	0	0.312366	0.196614	0.342678	0	0	0	0	0	0	3	2	3	0	0	0
ENSG00000263935	TOMM20P3	TOMM20 pseudogene 3 [Source:HGNC Symbol;Acc:HGNC:50520]	18:8688022-8688410	0	0	0	0	0	0	0	0	0	0	0	0	0	0	0	0	0	0
ENSG00000263934	SNORD3A	small nucleolar RNA, C/D box 3A [Source:HGNC Symbol;Acc:HGNC:33189]	17:19188016-19188714	0.379968	0.332709	0.486353	0.272466	0.441009	0.384423	0.305158	0.351669	0.571841	9	9	12	7	12	9	7	8	13
ENSG00000114030	KPNA1	karyopherin alpha 1 [Source:HGNC Symbol;Acc:HGNC:6394]	3:122421949-122514945	6.33899	6.33987	6.6162	6.05396	5.80465	6.06841	5.85632	6.02029	5.84644	1673	1911	1819	1733	1760	1583	1497	1526	1481
ENSG00000263931	RP11-180P8.1	-	17:62935402-62966810	0	0	0	0	0	0	0	0	0	0	0	0	0	0	0	0	0	0
ENSG00000270446	RP6-43L17.1	-	X:87806433-87806769	0.142018	0	0	0	0	0	0	0	0	1	0	0	0	0	0	0	0	0
ENSG00000204334	ERICH2	glutamate rich 2 [Source:HGNC Symbol;Acc:HGNC:44395]	2:170783786-170798971	2.62887	2.99931	2.98245	3.52551	3.18977	2.90156	4.3593	2.82019	3.73498	33	43	39	48	46	36	53	34	45
ENSG00000263938	RP11-579O24.3	-	17:58965952-58966727	0	0	0	0	0	0	0	0	0	0	0	0	0	0	0	0	0	0
ENSG00000261687	RP11-473C18.3	-	15:43184079-43185141	0	0	0.172812	0.165914	0.1567	0	0	0	0	0	0	2	2	2	0	0	0	0
ENSG00000261685	RP11-401P9.4	-	16:50645809-50649249	0.0139087	0	0	0	0.12111	0	0	0	0	1	0	0	0	10	0	0	0	0
ENSG00000261684	RP11-265N6.1	-	15:42531867-42532840	0	0	0.108671	0.104334	0.0985396	0	0	0	0	0	0	2	2	2	0	0	0	0
ENSG00000261683	LINC00838	long intergenic non-protein coding RNA 838 [Source:HGNC Symbol;Acc:HGNC:44963]	10:33759713-33772658	0	0	0	0	0	0	0	0	0	0	0	0	0	0	0	0	0	0
ENSG00000261682	RP11-19N8.7	-	16:33129316-33134499	0	0	0	0	0	0	0	0	0	0	0	0	0	0	0	0	0	0
ENSG00000261680	RP11-146F11.3	-	16:30624285-30624714	0	0	0	0	0	0	0	0	0	0	0	0	0	0	0	0	0	0
ENSG00000156313	RPGR	retinitis pigmentosa GTPase regulator [Source:HGNC Symbol;Acc:HGNC:10295]	X:38269163-38327564	1.00558	1.22962	1.16088	0.959085	1.0413	1.14894	1.10536	1.02897	1.04316	232	324	279	240	276	262	247	228	231
ENSG00000260412	RP11-438B23.2	-	9:27937617-27944497	0	0	0	0	0	0	0	0	0	0	0	0	0	0	0	0	0	0
ENSG00000039537	C6	complement component 6 [Source:HGNC Symbol;Acc:HGNC:1339]	5:41142234-41261438	0.00857552	0	0	0	0	0	0.00885785	0	0	1	0	0	0	0	0	1	0	0
ENSG00000261689	AGGF1P4	angiogenic factor with G-patch and FHA domains 1 pseudogene 4 [Source:HGNC Symbol;Acc:HGNC:38054]	16:35389203-35390003	0	0	0	0	0	0	0	0	0	0	0	0	0	0	0	0	0	0
ENSG00000254013	MAP2K1P1	mitogen-activated protein kinase kinase 1 pseudogene 1 [Source:HGNC Symbol;Acc:HGNC:6841]	8:30027713-30028900	1.49115	0.882155	0.928492	0.966061	1.01731	0.978586	1.16507	0.881198	1.00773	37	25	24	26	29	24	28	21	24
ENSG00000262332	RP11-517A5.7	-	16:16223027-16224261	0	0	0.0847695	0	0	0	0	0	0	0	0	1	0	0	0	0	0	0
ENSG00000254010	RP11-103H7.5	-	8:126556896-126557433	0	0	0	0	0	0	0	0	0	0	0	0	0	0	0	0	0	0
ENSG00000109220	CHIC2	cysteine rich hydrophobic domain 2 [Source:HGNC Symbol;Acc:HGNC:1935]	4:54009789-54064690	3.03606	2.97311	3.75814	3.16746	2.76441	3.5567	3.48522	3.6811	3.621	152	170	196	172	159	176	169	177	174
ENSG00000270440	RP11-19H6.1	-	16:5838131-5838661	0	0	0	0	0	0	0	0	0	0	0	0	0	0	0	0	0	0
ENSG00000262339	RP11-1197K16.2	-	17:82978525-82981738	0	0	0	0	0	0	0	0	0	0	0	0	0	0	0	0	0	0
ENSG00000225724	LL22NC03-80A10.11	-	22:22339573-22341214	0	0	0	0.0268777	0	0	0	0	0	0	0	0	1	0	0	0	0	0
ENSG00000012048	BRCA1	breast cancer 1 [Source:HGNC Symbol;Acc:HGNC:1100]	17:43044295-43170245	3.45752	3.63799	3.52011	3.65587	4.14976	3.64204	4.3368	4.42492	4.24657	1750	2103	1856	2007	2413	1822	2126	2151	2063
ENSG00000225726	AC007000.10	-	7:77071751-77072237	0	0	0	0.181245	0.0855475	0.0994493	0.203021	0.102373	0	0	0	0	2	1	1	2	1	0
ENSG00000115268	RPS15	ribosomal protein S15 [Source:HGNC Symbol;Acc:HGNC:10388]	19:1438358-1440494	46.8415	48.893	51.7373	53.1596	51.8976	49.2217	55.533	54.0153	51.6344	5153	6143	5929	6343	6559	5352	5917	5707	5452
ENSG00000225720	RP4-742C19.12	-	22:39091586-39092855	0	0	0	0	0	0	0	0	0	0	0	0	0	0	0	0	0	0
ENSG00000225721	RP11-269F19.2	-	1:44759037-44775810	0.0486382	0	0	0	0.0423391	0	0	0	0.202757	1	0	0	0	1	0	0	0	4
ENSG00000225722	RP11-706O15.8	-	X:3953056-3953561	0	0	0	0	0	0	0	0	0	0	0	0	0	0	0	0	0	0
ENSG00000225723	MTND6P15	mitochondrially encoded NADH:ubiquinone oxidoreductase core subunit 6 pseudogene 15 [Source:HGNC Symbol;Acc:HGNC:39478]	1:237949214-237949734	0	0	0	0	0	0	0	0	0	0	0	0	0	0	0	0	0	0
ENSG00000264663	KRT8P34	keratin 8 pseudogene 34 [Source:HGNC Symbol;Acc:HGNC:39868]	17:39835037-39836080	0	0	0	0	0	0	0	0	0	0	0	0	0	0	0	0	0	0
ENSG00000225728	RP6-191P20.3	-	X:107939263-107939642	0	0	0	0	0	0	0	0	0	0	0	0	0	0	0	0	0	0
ENSG00000229654	RP1-60O19.2	-	6:106695535-106699994	0	0	0	0	0	0	0	0	0	0	0	0	0	0	0	0	0	0
ENSG00000263680	RP11-57A1.1	-	17:72425939-72428852	0	0	0	0	0	0	0	0	0	0	0	0	0	0	0	0	0	0
ENSG00000263683	RP4-777O23.1	-	7:30550217-30551569	0	0	0	0.103356	0	0	0	0	0	0	0	0	1	0	0	0	0	0
ENSG00000263682	RP11-93H10.1	-	18:11326270-11328832	0	0	0	0	0	0	0	0	0	0	0	0	0	0	0	0	0	0
ENSG00000263684	RP11-628O18.1	-	17:11874932-11875828	0	0	0	0	0	0	0	0	0	0	0	0	0	0	0	0	0	0
ENSG00000229652	RP11-435P24.2	-	1:203353365-203353651	0	0.146051	0	0	0	0	0.17225	0.173712	0	0	1	0	0	0	0	1	1	0
ENSG00000149716	ORAOV1	oral cancer overexpressed 1 [Source:HGNC Symbol;Acc:HGNC:17589]	11:69653076-69675416	0.673414	0.901326	0.64645	0.806857	0.95801	1.0535	1.05977	0.917387	0.608887	227	347	227	295	371	351	346	297	197
ENSG00000263688	RP11-386P4.1	-	18:32581528-32582828	0	0	0	0	0	0	0	0	0	0	0	0	0	0	0	0	0	0
ENSG00000251166	OR7E163P	olfactory receptor family 7 subfamily E member 163 pseudogene [Source:HGNC Symbol;Acc:HGNC:45040]	4:3889356-3890249	0	0	0	0	0	0	0	0	0	0	0	0	0	0	0	0	0	0
ENSG00000276085	CCL3L3	chemokine (C-C motif) ligand 3-like 3 [Source:HGNC Symbol;Acc:HGNC:30554]	17:36194869-36196758	0.0441937	0.0580296	0	0.020366	0.0192255	0.0446994	0	0.0230067	0.0230172	2	3	0	1	1	2	0	1	1
ENSG00000266208	CTD-2267D19.3	-	17:40360655-40364693	5.32738	5.46532	5.1799	5.67055	5.79149	5.48245	6.51547	5.78499	5.81245	233	273	236	269	291	237	276	243	244
ENSG00000184254	ALDH1A3	aldehyde dehydrogenase 1 family member A3 [Source:HGNC Symbol;Acc:HGNC:409]	15:100877714-100916626	0	0	0	0	0	0	0	0	0	0	0	0	0	0	0	0	0	0
ENSG00000259316	CTD-2116N17.1	-	15:64181180-64381440	0.389957	1.43404	1.88834	2.21308	2.27043	2.47241	2.07572	1.77749	1.24593	45	189	227	277	301	282	232	197	138
ENSG00000254018	RP11-785H20.1	-	8:121884724-121904273	0	0	0	0	0	0	0	0	0	0	0	0	0	0	0	0	0	0
ENSG00000251168	CTD-2072I24.1	-	5:7924292-7925398	0	0	0	0	0	0	0	0	0	0	0	0	0	0	0	0	0	0
ENSG00000264660	RP11-381P6.1	-	17:20963722-20980238	0	0.202496	0.370076	0	0.067088	0.07799	0	0	0.0803193	0	3	5	0	1	1	0	0	1
ENSG00000184258	CDR1	cerebellar degeneration related protein 1 [Source:HGNC Symbol;Acc:HGNC:1798]	X:140782405-140784871	0	0	0	0	0	0	0	0	0	0	0	0	0	0	0	0	0	0
ENSG00000134612	FOLH1B	folate hydrolase 1B [Source:HGNC Symbol;Acc:HGNC:13636]	11:89639227-89698718	0	0	0	0	0	0	0	0	0	0	0	0	0	0	0	0	0	0
ENSG00000163170	BOLA3	bolA family member 3 [Source:HGNC Symbol;Acc:HGNC:24415]	2:74135398-74147994	6.45593	5.75461	5.22612	6.17507	6.34435	6.45926	6.34201	6.50755	6.44636	721	734	608	748	814	713	686	698	691
ENSG00000163171	CDC42EP3	CDC42 effector protein (Rho GTPase binding) 3 [Source:HGNC Symbol;Acc:HGNC:16943]	2:37641882-37738468	1.03667	0.892927	1.00864	1.07752	0.946375	1.09716	1.05583	0.754694	1.083	369	363	374	416	387	386	364	258	370
ENSG00000187783	TMEM72	transmembrane protein 72 [Source:HGNC Symbol;Acc:HGNC:31658]	10:44911200-44937002	0	0.0284825	0	0.0099962	0.0283185	0.0219397	0.0335916	0	0.0112975	0	3	0	1	3	2	3	0	1
ENSG00000280809	LINC00836	long intergenic non-protein coding RNA 836 [Source:HGNC Symbol;Acc:HGNC:44915]	10:25651712-25732935	0	0	0	0	0.0127211	0	0	0	0	0	0	0	0	1	0	0	0	0
ENSG00000008226	DLEC1	deleted in lung and esophageal cancer 1 [Source:HGNC Symbol;Acc:HGNC:2899]	3:38039205-38124025	0	0	0	0.0120403	0.011366	0.00880578	0.00449415	0.0135969	0.00906878	0	0	0	3	3	2	1	3	2
ENSG00000225898	AC002075.3	-	7:93777839-93778514	0	0.0620069	0	0	0.0616296	0	0	0.0737507	0	0	1	0	0	1	0	0	1	0
ENSG00000166529	ZSCAN21	zinc finger and SCAN domain containing 21 [Source:HGNC Symbol;Acc:HGNC:13104]	7:100049774-100065038	2.33638	2.50203	2.8294	2.60974	2.73764	2.85476	2.23597	2.46073	2.2095	260	318	328	315	350	314	241	263	236
ENSG00000166526	ZNF3	zinc finger protein 3 [Source:HGNC Symbol;Acc:HGNC:13089]	7:100064033-100082548	3.04556	2.47964	3.32768	3.44996	3.56158	2.59908	3.03261	3.00671	3.55035	984	915	1120	1209	1322	830	949	933	1101
ENSG00000166527	CLEC4D	C-type lectin domain family 4 member D [Source:HGNC Symbol;Acc:HGNC:14554]	12:8509475-8522366	0	0	0	0	0	0	0	0	0	0	0	0	0	0	0	0	0	0
ENSG00000225895	TRAPPC2P8	trafficking protein particle complex 2 pseudogene 8 [Source:HGNC Symbol;Acc:HGNC:37731]	Y:18105314-18108102	0	0	0	0	0	0	0	0	0	0	0	0	0	0	0	0	0	0
ENSG00000182362	YBEY	ybeY metallopeptidase (putative) [Source:HGNC Symbol;Acc:HGNC:1299]	21:46286337-46297751	1.54861	0.929059	1.03235	1.26913	0.898648	1.04453	1.24359	0.880868	1.19514	108	74	75	96	72	72	84	59	80
ENSG00000166523	CLEC4E	C-type lectin domain family 4 member E [Source:HGNC Symbol;Acc:HGNC:14555]	12:8533305-8540963	0	0	0	0	0	0	0	0.0117528	0.0117582	0	0	0	0	0	0	0	1	1
ENSG00000225891	RP3-476K8.3	-	1:26462756-26467282	0.181036	0.31695	0.173792	0.250365	0.3151	0.0915535	0.186902	0.471223	0.377151	2	4	2	3	4	1	2	5	4
ENSG00000169021	UQCRFS1	ubiquinol-cytochrome c reductase, Rieske iron-sulfur polypeptide 1 [Source:HGNC Symbol;Acc:HGNC:12587]	19:29205321-29213541	31.2342	25.8522	26.267	26.193	24.6211	23.1815	25.0932	25.6499	27.202	2267	2143	1986	2062	2053	1663	1764	1788	1895
ENSG00000114698	PLSCR4	phospholipid scramblase 4 [Source:HGNC Symbol;Acc:HGNC:16497]	3:146192339-146251179	0.167173	0.104554	0.0859715	0.0990861	0.0935474	0.0604086	0.104796	0.0932512	0.161733	28	20	15	18	18	10	17	15	26
ENSG00000229388	RP11-442N24__B.1	-	1:28643228-28648581	0.0364787	0.255621	0.0700731	0.0672762	0.06354	0.0369145	0	0.113999	0.266157	1	8	2	2	2	1	0	3	7
ENSG00000244436	RP11-428G5.1	-	12:31897820-31898123	0	0	0	0	0	0	0	0	0	0	0	0	0	0	0	0	0	0
ENSG00000229386	OR8B9P	olfactory receptor family 8 subfamily B member 9 pseudogene [Source:HGNC Symbol;Acc:HGNC:14746]	11:124480999-124481923	0	0	0	0	0	0	0	0	0	0	0	0	0	0	0	0	0	0
ENSG00000229384	HMGB1P16	high mobility group box 1 pseudogene 16 [Source:HGNC Symbol;Acc:HGNC:39098]	X:36211096-36211635	0.0886296	0	0.0850834	0.245265	0	0	0.0915475	0	0	1	0	1	3	0	0	1	0	0
ENSG00000229385	AC010975.1	-	2:79493716-79500844	0	0	0	0	0	0	0	0	0	0	0	0	0	0	0	0	0	0
ENSG00000229382	BX322557.13	-	21:45336707-45338665	0	0	0	0	0	0	0	0	0	0	0	0	0	0	0	0	0	0
ENSG00000269256	RP11-325D15.2	-	10:76558350-76560994	0	0	0	0	0	0	0	0	0	0	0	0	0	0	0	0	0	0
ENSG00000229380	AC147651.5	-	7:561958-565619	0	0	0	0	0	0	0	0	0	0	0	0	0	0	0	0	0	0
ENSG00000260796	RP11-1348G14.5	-	16:28820570-28822033	0.443325	0.310494	0.595754	0.408721	0.23153	0.179377	0.183095	0.276975	0.184734	5	4	7	5	3	2	2	3	2
ENSG00000260797	CTD-2336H13.1	-	16:76878274-76878936	0	0	0	0	0	0	0	0	0	0	0	0	0	0	0	0	0	0
ENSG00000251088	RP11-325B23.2	-	3:98233651-98457898	0	0	0	0	0	0	0	0	0	0	0	0	0	0	0	0	0	0
ENSG00000260795	RP11-107C10.1	-	16:86906175-86906472	0	0	0	0	0	0	0	0	0	0	0	0	0	0	0	0	0	0
ENSG00000260792	RP11-982M15.8	-	14:104661120-104665558	0	0.0109845	0	0	0	0	0	0	0	0	1	0	0	0	0	0	0	0
ENSG00000260793	RP5-882C2.2	-	17:44221401-44223710	2.65201	2.712	2.7207	3.07967	3.48905	4.17833	2.61271	3.70983	3.58561	131	153	140	165	198	204	125	176	170
ENSG00000184788	SATL1	spermidine/spermine N1-acetyl transferase-like 1 [Source:HGNC Symbol;Acc:HGNC:27992]	X:85092287-85109048	0	0	0	0	0	0	0	0	0	0	0	0	0	0	0	0	0	0
ENSG00000184789	OR4C10P	olfactory receptor family 4 subfamily C member 10 pseudogene [Source:HGNC Symbol;Acc:HGNC:14800]	11:48432217-48433147	0	0	0	0	0	0	0	0	0	0	0	0	0	0	0	0	0	0
ENSG00000184786	TCTE3	t-complex-associated-testis-expressed 3 [Source:HGNC Symbol;Acc:HGNC:11695]	6:169740114-169751587	3.32976	4.41737	3.76144	4.40333	3.70345	4.73	5.39989	5.49812	5.36142	198	300	233	284	253	278	311	314	306
ENSG00000184787	UBE2G2	ubiquitin conjugating enzyme E2G 2 [Source:HGNC Symbol;Acc:HGNC:12483]	21:44768580-44802019	23.0772	23.1182	22.6808	27.2952	22.6585	24.1949	29.8382	31.5269	31.17	6508	7446	6663	8349	7341	6744	8150	8539	8437
ENSG00000251080	RP11-415C15.1	-	4:27133996-27140051	0	0	0	0	0	0	0	0	0	0	0	0	0	0	0	0	0	0
ENSG00000184785	SMIM10	small integral membrane protein 10 [Source:HGNC Symbol;Acc:HGNC:41913]	X:134990938-134992473	6.20292	8.37869	7.09157	8.53524	7.73263	8.35715	8.65713	8.76283	8.8333	199	307	237	297	285	265	269	270	272
ENSG00000251087	ALG1L3P	asparagine-linked glycosylation 1-like 3, pseudogene [Source:HGNC Symbol;Acc:HGNC:44372]	4:9703754-9710812	0	0	0	0	0	0	0	0	0	0	0	0	0	0	0	0	0	0
ENSG00000260798	RP11-354M1.2	-	16:68814330-68823526	0	0	0	0	0	0	0	0	0	0	0	0	0	0	0	0	0	0
ENSG00000260799	KRT8P50	keratin 8 pseudogene 50 [Source:HGNC Symbol;Acc:HGNC:48346]	15:42800968-42802405	0.0332823	0	0.0639332	0	0	0.06736	0.137512	0	0.0693717	1	0	2	0	0	2	4	0	2
ENSG00000231465	RP11-542K23.9	-	9:122471358-122475817	0	0	0	0	0	0	0	0	0	0	0	0	0	0	0	0	0	0
ENSG00000259256	RP11-838N2.3	-	18:3347776-3350559	0	0	0	0	0	0	0	0	0	0	0	0	0	0	0	0	0	0
ENSG00000181552	EDDM3B	epididymal protein 3B [Source:HGNC Symbol;Acc:HGNC:19223]	14:20768427-20770948	0	0	0	0	0	0	0	0	0	0	0	0	0	0	0	0	0	0
ENSG00000259254	CTD-2339L15.3	-	15:40642933-40646857	0.278348	0.324936	0.445382	0.0855295	0.0807396	0.375535	0.0958055	0.0966191	0.386653	3	4	5	1	1	4	1	1	4
ENSG00000264666	RP11-524F11.2	-	17:17591428-17610485	0.78862	0	0	0.415474	0	0.113957	0.116319	0.351921	0	7	0	0	4	0	1	1	3	0
ENSG00000259252	AC011648.1	-	15:70195638-70198509	0	0	0	0	0	0	0	0	0	0	0	0	0	0	0	0	0	0
ENSG00000259251	RP11-643M14.1	-	15:62060503-62062434	0.0186298	0.048949	0	0.0343583	0	0.0377048	0	0.213452	0.0388309	1	3	0	2	0	2	0	11	2
ENSG00000259250	RP11-50C13.1	-	15:58587507-58591676	0	0	0	0	0	0	0	0	0	0	0	0	0	0	0	0	0	0
ENSG00000119737	GPR75	G protein-coupled receptor 75 [Source:HGNC Symbol;Acc:HGNC:4526]	2:53852913-53859989	2.05999	2.43794	2.69462	2.50451	2.91625	2.22159	2.85142	2.00346	2.31134	91	123	124	120	148	97	122	85	98
ENSG00000269253	SIGLEC21P	sialic acid binding Ig-like lectin 21, pseudogene [Source:HGNC Symbol;Acc:HGNC:15610]	19:51198855-51201449	0	0	0	0	0	0	0	0	0	0	0	0	0	0	0	0	0	0
ENSG00000168476	REEP4	receptor accessory protein 4 [Source:HGNC Symbol;Acc:HGNC:26176]	8:22138020-22141951	13.4716	11.3651	11.9403	9.72915	9.29889	11.9146	10.9056	9.95346	10.1165	1343	1294	1240	1052	1065	1174	1053	953	968
ENSG00000168477	TNXB	tenascin XB [Source:HGNC Symbol;Acc:HGNC:11976]	6:32041154-32115334	0.672487	0.629145	0.64998	0.653984	0.603401	0.624459	0.639634	0.748157	0.616659	292	312	294	308	301	268	269	312	257
ENSG00000259259	NPM1P42	nucleophosmin 1 (nucleolar phosphoprotein B23, numatrin) pseudogene 42 [Source:HGNC Symbol;Acc:HGNC:45221]	15:72899399-72900260	0	0	0	0	0	0	0	0	0	0	0	0	0	0	0	0	0	0
ENSG00000259258	RP11-325L12.3	-	15:65105534-65105800	0	0	0	0	0	0	0	0	0	0	0	0	0	0	0	0	0	0
ENSG00000112697	TMEM30A	transmembrane protein 30A [Source:HGNC Symbol;Acc:HGNC:16667]	6:75252924-75284968	6.57081	6.88649	9.80286	6.19359	8.03453	8.76802	6.2066	8.88519	6.43594	1386	1659	2154	1417	1947	1828	1268	1800	1303
ENSG00000112695	COX7A2	cytochrome c oxidase subunit VIIa polypeptide 2 (liver) [Source:HGNC Symbol;Acc:HGNC:2288]	6:75237675-75250323	19.7778	14.6745	14.1654	15.6059	15.0467	15.0855	14.135	15.1772	17.408	1540	1305	1149	1318	1346	1161	1066	1135	1301
ENSG00000112699	GMDS	GDP-mannose 4,6-dehydratase [Source:HGNC Symbol;Acc:HGNC:4369]	6:1623806-2245692	2.85477	2.52309	3.15281	2.95379	3.00682	3.10559	3.03987	3.35445	2.94632	319	322	367	358	386	343	329	360	316
ENSG00000182093	WRB	tryptophan rich basic protein [Source:HGNC Symbol;Acc:HGNC:12790]	21:39380244-39428528	3.83045	5.80496	6.32567	3.88206	3.95589	4.19012	6.03634	4.45611	4.14686	665	1151	1144	731	789	719	1015	743	691
ENSG00000182095	TNRC18	trinucleotide repeat containing 18 [Source:HGNC Symbol;Acc:HGNC:11962]	7:5306790-5425414	3.67822	3.73336	3.82093	4.00934	4.04592	3.77771	3.338	3.17034	3.39046	1388	1609	1502	1641	1754	1409	1220	1149	1228
ENSG00000186788	SPATA31D3	SPATA31 subfamily D, member 3 [Source:HGNC Symbol;Acc:HGNC:38603]	9:81943500-81995251	0	0	0	0	0	0	0	0	0	0	0	0	0	0	0	0	0	0
ENSG00000108578	BLMH	bleomycin hydrolase [Source:HGNC Symbol;Acc:HGNC:1059]	17:30248195-30292056	16.4723	15.3927	15.9712	15.9824	14.4123	17.6733	16.3969	16.2916	16.4018	3093	3301	3124	3255	3109	3280	2982	2938	2956
ENSG00000186860	KRTAP17-1	keratin associated protein 17-1 [Source:HGNC Symbol;Acc:HGNC:18917]	17:41314917-41315695	0	0	0	0	0	0	0	0	0	0	0	0	0	0	0	0	0	0
ENSG00000108576	SLC6A4	solute carrier family 6 (neurotransmitter transporter), member 4 [Source:HGNC Symbol;Acc:HGNC:11050]	17:30194319-30236002	0	0.0100104	0	0	0.00995272	0	0	0	0.00794114	0	3	0	0	3	0	0	0	2
ENSG00000260240	APOOP5	apolipoprotein O pseudogene 5 [Source:HGNC Symbol;Acc:HGNC:48743]	16:59709993-59755026	0.0341613	0	0	0.0315012	0	0.0345695	0.035286	0	0.0356019	1	0	0	1	0	1	1	0	1
ENSG00000254563	RP11-673F18.1	-	11:78749250-78756480	0	0	0	0	0	0	0	0	0	0	0	0	0	0	0	0	0	0
ENSG00000260242	CTA-481E9.3	-	16:18002806-18173063	0.83142	0.909974	1.26372	0.766549	1.50777	0.981394	0.786893	1.3707	2.02126	12	15	19	12	25	14	11	19	28
ENSG00000254561	RP11-196E1.3	-	11:119608423-119659284	0	0	0	0	0	0	0	0	0	0	0	0	0	0	0	0	0	0
ENSG00000260244	RP11-588K22.2	-	4:155734448-155737062	0	0	0	0	0	0	0	0	0	0	0	0	0	0	0	0	0	0
ENSG00000254567	UBTFL9	upstream binding transcription factor, RNA polymerase I-like 9 (pseudogene) [Source:HGNC Symbol;Acc:HGNC:50286]	11:49133653-49134800	0	0	0	0	0	0	0	0	0	0	0	0	0	0	0	0	0	0
ENSG00000260246	AC000032.2	-	1:109693117-109693742	0	0	0	0	0	0	0	0	0	0	0	0	0	0	0	0	0	0
ENSG00000254565	MTND2P26	mitochondrially encoded NADH:ubiquinone oxidoreductase core subunit 2 pseudogene 26 [Source:HGNC Symbol;Acc:HGNC:42127]	11:103406213-103407241	0	0	0	0	0	0	0	0	0	0	0	0	0	0	0	0	0	0
ENSG00000119514	GALNT12	polypeptide N-acetylgalactosaminyltransferase 12 [Source:HGNC Symbol;Acc:HGNC:19877]	9:98807699-98850081	21.5461	21.4115	20.7823	20.931	21.4752	21.1042	20.7092	22.9347	22.7822	1882	2136	1891	1983	2155	1822	1752	1924	1910
ENSG00000254568	RP11-664I21.5	-	11:124883691-124887789	0	0	0	0	0	0	0	0	0	0	0	0	0	0	0	0	0	0
ENSG00000227769	AC072062.3	-	2:215004782-215085488	0	0	0	0	0	0	0	0	0	0	0	0	0	0	0	0	0	0
ENSG00000227766	HCG4P5	HLA complex group 4 pseudogene 5 [Source:HGNC Symbol;Acc:HGNC:22925]	6:29942075-29943067	0.192838	0.0844244	0	0.0888886	0.167863	0	0.199137	0.200828	0.15069	4	2	0	2	4	0	4	4	3
ENSG00000227764	RP11-354K1.1	-	1:211639695-211654581	0	0	0	0	0	0	0	0	0	0	0	0	0	0	0	0	0	0
ENSG00000227765	MYL12BP2	myosin light chain 12B pseudogene 2 [Source:HGNC Symbol;Acc:HGNC:51650]	4:184299129-184299640	0.0934766	0.163737	0.179562	0.0861977	0.0813704	0.0945934	0.096554	0.0973739	0.0974185	1	2	2	1	1	1	1	1	1
ENSG00000227762	GUSBP8	glucuronidase, beta pseudogene 8 [Source:HGNC Symbol;Acc:HGNC:42322]	5:99532628-99534611	0	0	0	0	0	0	0	0	0	0	0	0	0	0	0	0	0	0
ENSG00000227760	RP11-298E10.1	-	12:14192002-14192284	0	0	0	0	0	0	0	0	0	0	0	0	0	0	0	0	0	0
ENSG00000258610	RP11-488C13.7	-	14:76778952-76782249	0	0	0	0	0	0	0	0	0	0	0	0	0	0	0	0	0	0
ENSG00000074527	NTN4	netrin 4 [Source:HGNC Symbol;Acc:HGNC:13658]	12:95657807-95791152	0	0	0	0	0	0	0	0	0	0	0	0	0	0	0	0	0	0
ENSG00000258613	RPL21P7	ribosomal protein L21 pseudogene 7 [Source:HGNC Symbol;Acc:HGNC:19772]	14:65266638-65267690	0	0	0	0	0.086256	0	0	0	0	0	0	0	0	1	0	0	0	0
ENSG00000258615	RP11-725G5.3	-	14:95199039-95199345	0	0	0	0	0	0	0	0	0	0	0	0	0	0	0	0	0	0
ENSG00000258616	RP11-369C8.1	-	14:45706250-45715952	0	0	0	0	0	0	0	0	0	0	0	0	0	0	0	0	0	0
ENSG00000050130	JKAMP	JNK1/MAPK8-associated membrane protein [Source:HGNC Symbol;Acc:HGNC:20184]	14:59484443-59505410	2.48519	2.28517	1.85125	1.74514	1.60884	2.10432	2.02788	2.23517	1.92569	558	586	433	425	415	467	441	482	415
ENSG00000258618	RPL21P9	ribosomal protein L21 pseudogene 9 [Source:HGNC Symbol;Acc:HGNC:19780]	14:67714545-67715204	0	0	0	0	0	0	0	0	0	0	0	0	0	0	0	0	0	0
ENSG00000258619	RP11-134E15.1	-	14:32241524-32243093	0	0	0	0	0	0	0	0	0	0	0	0	0	0	0	0	0	0
ENSG00000169989	TIGD4	tigger transposable element derived 4 [Source:HGNC Symbol;Acc:HGNC:18335]	4:152769354-152779764	0.348631	0.169583	0.0743633	0.249998	0.320315	0.156757	0.239959	0.161324	0.282503	18	10	4	14	19	8	12	8	14
ENSG00000154269	ENPP3	ectonucleotide pyrophosphatase/phosphodiesterase 3 [Source:HGNC Symbol;Acc:HGNC:3358]	6:131628442-131747418	6.10516	6.19666	6.23722	4.79546	4.82433	5.40906	5.42305	5.04279	5.10815	716	830	762	610	650	627	616	568	575
ENSG00000169981	ZNF35	zinc finger protein 35 [Source:HGNC Symbol;Acc:HGNC:13099]	3:44648727-44660791	1.16835	0.681982	1.46426	0.987411	0.953414	0.919386	1.8932	0.785655	2.1302	144	96	188	132	135	112	226	93	252
ENSG00000154262	ABCA6	ATP binding cassette subfamily A member 6 [Source:HGNC Symbol;Acc:HGNC:36]	17:69078702-69141888	0.0177735	0.0155638	0.0227508	0.0136561	0.00773581	0.0149863	0.0305845	0.0154237	0.0185169	6	6	8	5	3	5	10	5	6
ENSG00000154263	ABCA10	ATP binding cassette subfamily A member 10 [Source:HGNC Symbol;Acc:HGNC:30]	17:69147214-69244846	0.00761089	0.00666243	0	0	0	0	0.00392877	0.0118864	0	2	2	0	0	0	0	1	3	0
ENSG00000154265	ABCA5	ATP binding cassette subfamily A member 5 [Source:HGNC Symbol;Acc:HGNC:35]	17:69244311-69327244	0.0637558	0.0511707	0.0765028	0.0440865	0.0508708	0.0645042	0.0713104	0.0691497	0.0857975	24	22	30	18	22	24	26	25	31
ENSG00000227498	AC018359.3	-	3:34524818-34543880	0	0	0	0	0	0	0	0	0	0	0	0	0	0	0	0	0	0
ENSG00000227499	RP11-419M24.4	-	7:55877912-55878164	0	0	0	0	0	0	0	0	0	0	0	0	0	0	0	0	0	0
ENSG00000242879	AC006335.11	-	Y:6307710-6309587	0	0	0	0	0	0	0	0	0	0	0	0	0	0	0	0	0	0
ENSG00000187258	NPSR1	neuropeptide S receptor 1 [Source:HGNC Symbol;Acc:HGNC:23631]	7:34658239-34878332	0	0	0	0	0	0	0	0	0	0	0	0	0	0	0	0	0	0
ENSG00000180209	MYLPF	myosin light chain, phosphorylatable, fast skeletal muscle [Source:HGNC Symbol;Acc:HGNC:29824]	16:30370934-30377991	0.0701596	0.0614164	0	0	0	0	0	0	0.109623	2	2	0	0	0	0	0	0	3
ENSG00000274367	LA16c-380H5.6	-	16:2981175-2981591	0.57409	0.201039	0.33065	0	0.799561	0.34843	0.948287	0.47823	0.358837	5	2	3	0	8	3	8	4	3
ENSG00000164961	KIAA0196	KIAA0196 [Source:HGNC Symbol;Acc:HGNC:28984]	8:125024260-125091840	8.29937	9.14736	8.84782	9.43334	9.30543	9.53609	10.2697	10.0527	9.59553	1194	1503	1326	1472	1538	1356	1431	1389	1325
ENSG00000187257	RSBN1L	round spermatid basic protein 1-like [Source:HGNC Symbol;Acc:HGNC:24765]	7:77696443-77783022	4.80464	5.01717	5.93656	4.58922	4.46825	5.84114	5.13034	4.9351	4.72194	1111	1325	1430	1151	1187	1335	1149	1096	1048
ENSG00000227493	RP11-104D21.1	-	X:51030422-51031357	0	0	0	0	0	0	0	0	0	0	0	0	0	0	0	0	0	0
ENSG00000227494	USP9YP14	ubiquitin specific peptidase 9, Y-linked pseudogene 14 [Source:HGNC Symbol;Acc:HGNC:38748]	Y:18481087-18487400	0	0	0	0	0	0	0	0	0	0	0	0	0	0	0	0	0	0
ENSG00000274364	RP3-324O17.7	-	20:31535263-31535626	0.131484	0	0.126223	0.363855	0	0.133054	0.135812	0.136965	0	1	0	1	3	0	1	1	1	0
ENSG00000242875	RBMY1B	RNA binding motif protein, Y-linked, family 1, member B [Source:HGNC Symbol;Acc:HGNC:23914]	Y:21511338-21549094	0	0	0	0	0	0	0	0	0	0	0	0	0	0	0	0	0	0
ENSG00000164967	RPP25L	ribonuclease P/MRP 25kDa subunit-like [Source:HGNC Symbol;Acc:HGNC:19909]	9:34610486-34612104	7.39506	5.14299	4.0971	6.46739	6.25305	4.95942	5.67188	7.39184	7.35245	175	139	101	166	170	116	130	168	167
ENSG00000258705	AE000660.4	-	14:22011910-22014964	0	0	0	0	0	0	0	0	0	0	0	0	0	0	0	0	0	0
ENSG00000282980	RP11-807C20.2	-	17:5512040-5512537	0.384514	0.505104	0.46148	0.620434	0.753169	0.389109	0.694879	0.600567	0.500786	4	6	5	7	9	4	7	6	5
ENSG00000282987	RP11-901H12.1	-	3:21006730-21226305	0	0	0	0	0	0	0	0	0	0	0	0	0	0	0	0	0	0
ENSG00000186124	OR9M1P	olfactory receptor family 9 subfamily M member 1 pseudogene [Source:HGNC Symbol;Acc:HGNC:15327]	11:55855592-55856512	0	0	0	0	0	0	0	0	0	0	0	0	0	0	0	0	0	0
ENSG00000282989	KB-1396H2.2	-	8:101871830-101872549	0	0.0582176	0	0.0612961	0	0	0.137321	0.0692437	0.0692754	0	1	0	1	0	0	2	1	1
ENSG00000282988	RP1-34B20.21	-	6:26195595-26199293	5.36677	7.60425	6.07107	7.28855	7.24947	6.80412	8.20809	7.88339	8.9092	241	390	284	355	374	302	357	340	384
ENSG00000245479	LINC01585	long intergenic non-protein coding RNA 1585 [Source:HGNC Symbol;Acc:HGNC:51432]	15:90660234-90664967	0	0.0489395	0	0.0257637	0.0973075	0	0	0	0.0291175	0	2	0	1	4	0	0	0	1
ENSG00000165383	LRRC18	leucine rich repeat containing 18 [Source:HGNC Symbol;Acc:HGNC:23199]	10:48909483-48935190	0	0	0	0	0	0	0	0	0	0	0	0	0	0	0	0	0	0
ENSG00000283058	RP11-358H12.1	-	2:50620963-50632993	0	0	0	0	0	0	0	0	0	0	0	0	0	0	0	0	0	0
ENSG00000123447	TYRL	tyrosinase-like (pseudogene) [Source:HGNC Symbol;Acc:HGNC:12443]	11:49405091-49415789	0	0	0	0	0	0	0	0	0	0	0	0	0	0	0	0	0	0
ENSG00000283057	RP11-417N10.5	-	16:71777603-71777834	0	0	0.198039	0	0.35933	0.417516	0.213085	0.429788	0	0	0	1	0	2	2	1	2	0
ENSG00000283052	RP11-210L7.3	-	12:102304355-102463491	0.0361754	0.126732	0.0694905	0	0.157514	0.146467	0.0373663	0.0376836	0.0377009	1	4	2	0	5	4	1	1	1
ENSG00000123444	KBTBD4	kelch repeat and BTB (POZ) domain containing 4 [Source:HGNC Symbol;Acc:HGNC:23761]	11:47572197-47579015	1.26734	1.21989	1.05546	1.1491	1.1141	1.23127	1.23917	1.01371	1.45594	302	332	262	297	305	290	286	232	333
ENSG00000283050	GTF2IP12	general transcription factor IIi pseudogene 12 [Source:HGNC Symbol;Acc:HGNC:51723]	4:119407967-119454638	0.973095	1.40022	1.27447	1.43963	1.73344	1.47296	1.76795	1.90073	1.86263	129	212	176	207	264	193	227	242	237
ENSG00000283051	KB-51A8.1	-	21:42777819-42779994	0	0	0	0	0	0	0	0	0	0	0	0	0	0	0	0	0	0
ENSG00000183576	SETD3	SET domain containing 3 [Source:HGNC Symbol;Acc:HGNC:20493]	14:99397746-99480889	4.53171	3.73686	3.76921	3.44836	3.88154	4.04059	3.70677	3.68966	3.93992	876	825	759	723	862	772	694	685	731
ENSG00000226465	RP13-401N8.1	-	20:25751218-25752761	0	0	0.143578	0.137916	0	0	0	0	0	0	0	1	1	0	0	0	0	0
ENSG00000183570	PCBP3	poly(rC) binding protein 3 [Source:HGNC Symbol;Acc:HGNC:8651]	21:45643694-45942454	0.00873714	0.00764833	0.0419294	0.00402638	0.00760556	0.00883711	0.0135304	0.0363829	0	2	2	10	1	2	2	3	8	0
ENSG00000183571	PGPEP1L	pyroglutamyl-peptidase I-like [Source:HGNC Symbol;Acc:HGNC:27080]	15:98968230-99007795	0.0450037	0	0.043203	0	0.0195778	0.0227593	0	0	0.257853	2	0	2	0	1	1	0	0	11
ENSG00000183578	TNFAIP8L3	TNF alpha induced protein 8 like 3 [Source:HGNC Symbol;Acc:HGNC:20620]	15:51056598-51105276	0	0	0	0	0	0	0	0	0	0	0	0	0	0	0	0	0	0
ENSG00000151838	CCDC175	coiled-coil domain containing 175 [Source:HGNC Symbol;Acc:HGNC:19847]	14:59504539-59576831	0	0	0.0225831	0	0	0	0	0	0	0	0	2	0	0	0	0	0	0
ENSG00000237632	S100A11P1	S100 calcium binding protein A11 pseudogene 1 [Source:HGNC Symbol;Acc:HGNC:10491]	7:103262000-103262311	0	0	0	0	0	0	0.158448	0	0	0	0	0	0	0	0	1	0	0
ENSG00000250021	C15orf38-AP3S2	C15orf38-AP3S2 readthrough [Source:HGNC Symbol;Acc:HGNC:38824]	15:89834308-89912882	0	0	0	0	0	0	0	0.0470778	0	0	0	0	0	0	0	0	3	0
ENSG00000250020	RP11-811I15.1	-	5:58198-58915	0	0	0	0	0	0	0.137704	0	0.0694684	0	0	0	0	0	0	2	0	1
ENSG00000250027	RP11-563E2.2	-	4:163108785-163119965	0	0	0	0	0	0	0	0	0	0	0	0	0	0	0	0	0	0
ENSG00000250026	TMPRSS11BNL	TMPRSS11B N-terminal like, pseudogene [Source:HGNC Symbol;Acc:HGNC:37262]	4:68184081-68218080	0	0	0	0	0	0	0	0	0	0	0	0	0	0	0	0	0	0
ENSG00000257037	RARSP1	arginyl-tRNA synthetase pseudogene 1 [Source:HGNC Symbol;Acc:HGNC:49893]	12:27496937-27498589	0	0	0	0	0	0	0	0	0	0	0	0	0	0	0	0	0	0
ENSG00000250024	RP11-818C3.1	-	4:188990715-189002075	0	0	0	0	0	0	0	0	0	0	0	0	0	0	0	0	0	0
ENSG00000257038	RP11-800A3.7	-	11:73307235-73309361	0	0	0	0	0	0	0	0	0	0	0	0	0	0	0	0	0	0
ENSG00000116863	ADPRHL2	ADP-ribosylhydrolase like 2 [Source:HGNC Symbol;Acc:HGNC:21304]	1:36088875-36093932	20.1787	16.6628	18.1307	19.5569	22.4364	18.4699	18.0482	18.6193	17.405	703	663	658	739	898	636	609	623	582
ENSG00000255769	GOLGA2P10	golgin A2 pseudogene 10 [Source:HGNC Symbol;Acc:HGNC:26229]	15:82472993-82513950	6.65023	7.96008	7.82309	8.11601	8.8837	8.07009	7.93779	9.16567	6.84855	346	473	424	458	531	415	400	458	342
ENSG00000255763	MRPS18CP4	mitochondrial ribosomal protein S18C pseudogene 4 [Source:HGNC Symbol;Acc:HGNC:29745]	12:14237091-14237321	0	0	0	0	0	0	0	0	0	0	0	0	0	0	0	0	0	0
ENSG00000255760	RP11-428G5.5	-	12:31877079-31887203	0	0	0	0	0	0	0	0	0	0	0	0	0	0	0	0	0	0
ENSG00000255767	RP13-512J5.1	-	2:3531984-3547957	0.113682	0.0995646	0	0	0.0989588	0	0	0	0	1	1	0	0	1	0	0	0	0
ENSG00000202233	U3	Small nucleolar RNA U3 [Source:RFAM;Acc:RF00012]	7:25264656-25264882	0	0	0	0	0	0	0	0	0	0	0	0	0	0	0	0	0	0
ENSG00000006756	ARSD	arylsulfatase D [Source:HGNC Symbol;Acc:HGNC:717]	X:2903970-2929351	0.0629278	0.0593343	0.0185852	0.0401664	0.0337091	0.0293843	0.0549735	0.0403188	0.0403475	13	14	4	9	8	6	11	8	8
ENSG00000006757	PNPLA4	patatin like phospholipase domain containing 4 [Source:HGNC Symbol;Acc:HGNC:24887]	X:7898247-7927739	4.16587	4.12299	4.02348	4.59958	4.68223	5.09894	4.98442	4.77925	5.49828	491	555	494	588	634	594	569	541	622
ENSG00000154889	MPPE1	metallophosphoesterase 1 [Source:HGNC Symbol;Acc:HGNC:15988]	18:11882622-11909223	0.540369	0.547613	0.545149	0.505125	0.629324	0.599867	0.44685	0.49752	0.466554	216	250	227	219	289	237	173	191	179
ENSG00000242299	RP11-234A1.1	-	3:101576489-101576947	149.996	104.939	96.8277	113.865	120.575	111.971	105.111	112.735	137.91	1438	1149	967	1184	1328	1061	976	1038	1269
ENSG00000242296	DEFB109P1	defensin beta 109 pseudogene 1 [Source:HGNC Symbol;Acc:HGNC:18090]	8:12393209-12400366	0	0	0	0	0	0	0	0	0	0	0	0	0	0	0	0	0	0
ENSG00000242295	RP11-522B15.1	-	15:96448154-96448493	0	0	0	0	0	0	0	0	0	0	0	0	0	0	0	0	0	0
ENSG00000242294	STAG3L5P	stromal antigen 3-like 5 pseudogene [Source:HGNC Symbol;Acc:HGNC:48896]	7:100336079-100351900	5.46641	7.89153	7.41052	6.69933	10.2707	8.17449	5.16212	6.94108	7.40386	410	676	579	545	885	606	375	500	533
ENSG00000242291	RPL36AP51	ribosomal protein L36a pseudogene 51 [Source:HGNC Symbol;Acc:HGNC:36632]	19:21233335-21233652	0	0	0	0	0	0	0	0	0	0	0	0	0	0	0	0	0	0
ENSG00000242290	RP11-197K3.1	-	3:114445521-114529452	0	0	0	0	0	0	0	0	0	0	0	0	0	0	0	0	0	0
ENSG00000159459	UBR1	ubiquitin protein ligase E3 component n-recognin 1 [Source:HGNC Symbol;Acc:HGNC:16808]	15:42942897-43106113	4.38799	4.80593	4.8204	4.62964	4.52219	5.04135	5.13269	4.9871	5.19548	1136	1421	1300	1300	1345	1290	1287	1240	1291
ENSG00000211934	IGHV1-2	immunoglobulin heavy variable 1-2 [Source:HGNC Symbol;Acc:HGNC:5550]	14:105986582-105987083	0	0	0	0	0	0	0	0	0	0	0	0	0	0	0	0	0	0
ENSG00000211935	IGHV1-3	immunoglobulin heavy variable 1-3 [Source:HGNC Symbol;Acc:HGNC:5552]	14:106005095-106005574	0	0	0	0	0	0	0	0	0	0	0	0	0	0	0	0	0	0
ENSG00000165684	SNAPC4	small nuclear RNA activating complex polypeptide 4 [Source:HGNC Symbol;Acc:HGNC:11137]	9:136375577-136398797	11.0377	10.6183	10.7241	10.476	10.506	11.3123	10.8534	11.1144	10.2951	1155	1269	1169	1189	1263	1170	1100	1117	1034
ENSG00000159450	TCHH	trichohyalin [Source:HGNC Symbol;Acc:HGNC:11791]	1:152106317-152115454	0	0	0	0	0	0	0	0	0	0	0	0	0	0	0	0	0	0
ENSG00000100483	VCPKMT	valosin containing protein lysine (K) methyltransferase [Source:HGNC Symbol;Acc:HGNC:20352]	14:50108632-50116600	1.5305	0.931236	1.22019	0.980572	1.08383	1.31226	1.01776	1.23344	1.06305	177	123	147	123	144	150	114	137	118
ENSG00000165685	TMEM52B	transmembrane protein 52B [Source:HGNC Symbol;Acc:HGNC:26438]	12:10170542-10191801	0.0418191	0.0305115	0.0401459	0.141375	0.0485393	0.0282103	0.0503785	0.0362902	0.0435682	6	5	6	22	8	4	7	5	6
ENSG00000100485	SOS2	SOS Ras/Rho guanine nucleotide exchange factor 2 [Source:HGNC Symbol;Acc:HGNC:11188]	14:50117120-50231558	2.93981	3.78094	3.23937	3.30629	3.39531	3.34468	3.16519	3.2158	3.17015	514	755	590	627	682	578	536	540	532
ENSG00000159455	LCE2B	late cornified envelope 2B [Source:HGNC Symbol;Acc:HGNC:16610]	1:152686123-152687401	0	0	0	0	0	0	0	0	0	0	0	0	0	0	0	0	0	0
ENSG00000211938	IGHV3-7	immunoglobulin heavy variable 3-7 [Source:HGNC Symbol;Acc:HGNC:5620]	14:106062151-106062683	0	0	0	0	0	0	0	0	0	0	0	0	0	0	0	0	0	0
ENSG00000129562	DAD1	defender against cell death 1 [Source:HGNC Symbol;Acc:HGNC:2664]	14:22564905-22589269	38.288	30.5802	32.6861	32.8335	31.8847	29.4664	36.6221	31.5821	35.9685	1617	1475	1438	1504	1547	1230	1498	1281	1458
ENSG00000107651	SEC23IP	SEC23 interacting protein [Source:HGNC Symbol;Acc:HGNC:17018]	10:119892711-119944658	7.1195	7.75431	7.48328	6.72317	6.62656	7.20309	6.87186	6.74507	6.4666	1443	1795	1580	1478	1543	1443	1349	1313	1258
ENSG00000006282	SPATA20	spermatogenesis associated 20 [Source:HGNC Symbol;Acc:HGNC:26125]	17:50543058-50555852	0.178744	0.215195	0.223676	0.170683	0.230599	0.200218	0.148297	0.242606	0.269363	56	77	73	58	83	62	45	73	81
ENSG00000006283	CACNA1G	calcium channel, voltage-dependent, T type, alpha 1G subunit [Source:HGNC Symbol;Acc:HGNC:1394]	17:50561068-50627474	0.00254913	0.0111629	0.0244787	0.00940487	0	0.00257959	0.00526612	0.0132771	0.00265663	1	5	10	4	0	1	2	5	1
ENSG00000253642	RP11-317N12.1	-	8:33604856-34039008	0.261023	0.190463	0.229704	0.381056	0.151484	0.484187	0.269504	0.430328	0.679895	12	10	11	19	8	22	12	19	30
ENSG00000253643	RP11-561E1.1	-	8:24490312-24514829	0	0	0	0	0	0	0	0	0	0	0	0	0	0	0	0	0	0
ENSG00000217442	SYCE3	synaptonemal complex central element protein 3 [Source:HGNC Symbol;Acc:HGNC:35245]	22:50551112-50562905	0.24239	0	0.0581583	0	0.105525	0	0	0	0	4	0	1	0	2	0	0	0	0
ENSG00000266717	RP11-855A2.3	-	17:67950885-67951746	0	0	0	0	0	0	0	0	0	0	0	0	0	0	0	0	0	0
ENSG00000253646	CTD-2311A18.1	-	5:155111184-155112324	0	0	0	0	0	0	0	0	0	0	0	0	0	0	0	0	0	0
ENSG00000253647	CTD-2270F17.1	uncharacterized LOC101928033 [Source:EntrezGene;Acc:101928033]	5:170389493-170422844	0	0	0	0	0	0	0	0	0	0	0	0	0	0	0	0	0	0
ENSG00000253644	KB-1930G5.3	-	8:101387299-101393186	0	0	0	0	0	0	0	0	0	0	0	0	0	0	0	0	0	0
ENSG00000253645	CTD-2544N14.3	-	8:38970360-38973011	0	0	0	0	0	0	0	0	0	0	0	0	0	0	0	0	0	0
ENSG00000253648	RP11-77B22.2	-	8:15973315-16000324	0	0	0	0	0	0	0	0	0	0	0	0	0	0	0	0	0	0
ENSG00000253649	PRSS51	protease, serine 51 [Source:HGNC Symbol;Acc:HGNC:37321]	8:10482878-10547585	0	0	0	0	0	0	0	0	0	0	0	0	0	0	0	0	0	0
ENSG00000174004	NRROS	negative regulator of reactive oxygen species [Source:HGNC Symbol;Acc:HGNC:24613]	3:196639686-196662004	5.10696	4.76433	4.77115	4.94669	4.39239	4.39803	4.67647	4.60526	4.68734	336	358	327	353	332	286	298	291	296
ENSG00000237133	AC020594.5	-	2:33555047-33563547	0	0.372042	0.272	0.130572	0.493159	0.429868	0.438778	0.295003	0.147569	0	3	2	1	4	3	3	2	1
ENSG00000198718	FAM179B	family with sequence similarity 179 member B [Source:HGNC Symbol;Acc:HGNC:19959]	14:44962208-45074431	0.393521	0.446135	0.465108	0.335552	0.441537	0.485596	0.439181	0.459476	0.374448	173	224	213	160	223	211	187	194	158
ENSG00000164037	SLC9B1	solute carrier family 9, subfamily B (NHA1, cation proton antiporter 1), member 1 [Source:HGNC Symbol;Acc:HGNC:24244]	4:102885048-103019739	0.221273	0.20989	0.159308	0.272005	0.288903	0.261185	0.247492	0.335989	0.211327	24	26	18	32	36	28	26	35	22
ENSG00000164035	EMCN	endomucin [Source:HGNC Symbol;Acc:HGNC:16041]	4:100395341-100880126	0	0	0	0	0	0	0	0	0	0	0	0	0	0	0	0	0	0
ENSG00000164032	H2AFZ	H2A histone family member Z [Source:HGNC Symbol;Acc:HGNC:4741]	4:99948086-99950388	36.4723	36.675	29.8215	32.1943	32.159	31.6921	30.1956	28.133	38.1072	4931	5663	4200	4721	4995	4235	3954	3653	4945
ENSG00000237130	MRPS6P2	mitochondrial ribosomal protein S6 pseudogene 2 [Source:HGNC Symbol;Acc:HGNC:29781]	1:50846468-50846837	0	0	0	0	0	0	0	0	0	0	0	0	0	0	0	0	0	0
ENSG00000164031	DNAJB14	DnaJ heat shock protein family (Hsp40) member B14 [Source:HGNC Symbol;Acc:HGNC:25881]	4:99896248-99946726	1.80147	1.86943	1.54752	1.61724	1.71233	1.999	1.79108	1.7278	1.81186	837	992	749	815	914	918	806	771	808
ENSG00000242121	RN7SL267P	RNA, 7SL, cytoplasmic 267, pseudogene [Source:HGNC Symbol;Acc:HGNC:46283]	2:182314284-182314544	0	0	0	0	0	0	0	0	0	0	0	0	0	0	0	0	0	0
ENSG00000198711	SSBP3-AS1	SSBP3 antisense RNA 1 [Source:HGNC Symbol;Acc:HGNC:32328]	1:54236440-54239063	0.164209	0.0319487	0.105092	0.151405	0.174711	0.221524	0.0565194	0.0569994	0.0190085	9	2	6	9	11	12	3	3	1
ENSG00000242123	RP11-51L5.1	-	17:62319884-62320189	0	0	0	0	0	0	0	0	0	0	0	0	0	0	0	0	0	0
ENSG00000237131	RP1-69E11.3	-	1:168215405-168215652	0	0	0	0	0	0	0	0	0	0	0	0	0	0	0	0	0	0
ENSG00000242125	SNHG3	small nucleolar RNA host gene 3 [Source:HGNC Symbol;Acc:HGNC:10118]	1:28505980-28510892	52.9049	51.6884	61.2931	48.971	49.2512	53.4196	47.821	51.0772	51.6481	5525	6165	6668	5547	5909	5514	4837	5123	5177
ENSG00000198715	GLMP	glycosylated lysosomal membrane protein [Source:HGNC Symbol;Acc:HGNC:29436]	1:156290089-156295689	1.31858	1.77206	1.25106	1.32878	1.45025	1.3806	1.51443	1.43678	1.40041	258	396	255	282	326	267	287	270	263
ENSG00000164038	SLC9B2	solute carrier family 9, subfamily B (NHA2, cation proton antiporter 2), member 2 [Source:HGNC Symbol;Acc:HGNC:25143]	4:103019868-103085829	1.4308	1.24779	1.27501	1.3139	1.36948	1.30342	1.45961	1.35325	1.7639	251	250	233	250	276	226	248	228	297
ENSG00000164039	BDH2	3-hydroxybutyrate dehydrogenase, type 2 [Source:HGNC Symbol;Acc:HGNC:32389]	4:103079435-103099883	1.05312	1.10789	1.14676	1.02167	1.25873	0.866702	1.23338	1.05561	1.18728	134	161	152	141	184	109	152	129	145
ENSG00000100151	PICK1	protein interacting with PRKCA 1 [Source:HGNC Symbol;Acc:HGNC:9394]	22:38056311-38075701	2.22004	2.27235	1.75294	1.95455	2.00317	1.89179	2.16945	1.94689	2.1501	355	415	292	339	368	299	336	299	330
ENSG00000100150	DEPDC5	DEP domain containing 5 [Source:HGNC Symbol;Acc:HGNC:18423]	22:31753951-31907034	0.812856	0.968729	0.932031	0.88028	1.022	0.861561	0.842581	0.930317	0.944345	252	343	301	296	364	264	253	277	281
ENSG00000100156	SLC16A8	solute carrier family 16 (monocarboxylate transporter), member 8 [Source:HGNC Symbol;Acc:HGNC:16270]	22:38078134-38084093	0	0	0	0	0	0	0	0	0	0	0	0	0	0	0	0	0	0
ENSG00000171634	BPTF	bromodomain PHD finger transcription factor [Source:HGNC Symbol;Acc:HGNC:3581]	17:67825524-67984378	4.24896	5.4492	5.46224	5.43481	5.81496	5.71506	5.80655	5.30241	5.2282	2055	3010	2752	2851	3231	2732	2720	2463	2427
ENSG00000100154	TTC28	tetratricopeptide repeat domain 28 [Source:HGNC Symbol;Acc:HGNC:29179]	22:27978014-28679865	0.859838	0.891618	0.857776	1.05388	0.898124	0.958634	0.98872	1.09539	0.923942	255	302	265	339	306	281	284	312	263
ENSG00000120068	HOXB8	homeobox B8 [Source:HGNC Symbol;Acc:HGNC:5119]	17:48611377-48614939	6.24222	5.99844	6.21697	6.48892	6.43867	7.89439	5.54263	6.30448	5.38169	400	439	415	451	474	500	344	388	331
ENSG00000230773	AC079807.4	-	2:47941696-48240983	0	0	0	0	0	0	0	0	0	0	0	0	0	0	0	0	0	0
ENSG00000230772	VN1R108P	vomeronasal 1 receptor 108 pseudogene [Source:HGNC Symbol;Acc:HGNC:37432]	20:25734264-25735093	0.461474	0.606075	0.387599	0.425485	0.351463	0.525223	0.655112	0.36034	0.420721	8	12	7	8	7	9	11	6	7
ENSG00000243455	RPS18P13	ribosomal protein S18 pseudogene 13 [Source:HGNC Symbol;Acc:HGNC:36901]	19:18048637-18049090	0	0	0	0	0	0	0	0	0	0	0	0	0	0	0	0	0	0
ENSG00000230779	RP1-140J1.4	-	1:153225080-153226006	0	0	0	0	0	0.0522457	0.0533286	0	0	0	0	0	0	0	1	1	0	0
ENSG00000243453	COX7BP1	cytochrome c oxidase subunit VIIb pseudogene 1 [Source:HGNC Symbol;Acc:HGNC:16529]	22:35194699-35194942	0.392491	0.343579	0.565086	0.180874	0.683147	0.396982	0.40521	0.408651	0.204419	2	2	3	1	4	2	2	2	1
ENSG00000125743	SNRPD2	small nuclear ribonucleoprotein D2 polypeptide [Source:HGNC Symbol;Acc:HGNC:11159]	19:45687454-45692569	20.911	18.2964	16.2214	16.4405	31.4371	17.6279	17.8686	29.9318	17.8792	1433	1432	1158	1222	2475	1194	1186	1970	1176
ENSG00000125741	OPA3	optic atrophy 3 (autosomal recessive, with chorea and spastic paraplegia) [Source:HGNC Symbol;Acc:HGNC:8142]	19:45527427-45602212	4.67943	4.54167	5.12266	4.76657	4.17342	4.40638	4.03863	4.44589	3.90205	1097	1216	1251	1212	1124	1021	917	1001	878
ENSG00000125740	FOSB	FBJ murine osteosarcoma viral oncogene homolog B [Source:HGNC Symbol;Acc:HGNC:3797]	19:45467995-45475179	0.214648	0.157463	0.219974	0.160458	0.194413	0.170213	0.113804	0.111747	0.0755518	74	62	79	60	77	58	38	37	25
ENSG00000125746	EML2	echinoderm microtubule associated protein like 2 [Source:HGNC Symbol;Acc:HGNC:18035]	19:45606994-45645629	5.07564	4.5771	5.00846	5.02185	4.86162	4.74259	4.54011	4.59259	4.66581	1504	1549	1546	1614	1655	1389	1303	1307	1327
ENSG00000125744	RTN2	reticulon 2 [Source:HGNC Symbol;Acc:HGNC:10468]	19:45485289-45497061	2.11043	2.25848	2.12523	1.71048	2.04111	1.90494	1.85852	1.41467	1.73172	306	374	321	269	340	273	261	197	241
ENSG00000203546	RP11-176H8.1	-	14:31334312-31457441	0.0394576	0.00863727	0.0284115	0.027291	0.0858727	0.0598887	0.132416	0.112994	0.0205556	4	1	3	3	10	6	13	11	2
ENSG00000251867	RP11-48B3.5	-	8:80484561-80485619	0.542504	0.237528	0.347212	0.791978	0.472242	0.274448	0.980264	0.564887	0.61234	12	6	8	19	12	6	21	12	13
ENSG00000167608	TMC4	transmembrane channel like 4 [Source:HGNC Symbol;Acc:HGNC:22998]	19:54160108-54173250	0.134594	0.101012	0.0645998	0.0620434	0.0502113	0.0583614	0.0794048	0.100101	0.0901516	14	12	7	7	6	6	8	10	9
ENSG00000124299	PEPD	peptidase D [Source:HGNC Symbol;Acc:HGNC:8840]	19:33386950-33521794	3.49282	3.00749	2.63645	3.41403	2.90784	3.08661	2.94036	3.34251	2.69532	482	474	379	511	461	421	393	443	357
ENSG00000167600	CYP2S1	cytochrome P450 family 2 subfamily S member 1 [Source:HGNC Symbol;Acc:HGNC:15654]	19:41193049-41207539	0.745182	1.05119	0.953791	1.27865	1.39636	1.27749	0.886924	1.30392	1.18614	72	116	96	134	155	122	83	121	110
ENSG00000167601	AXL	AXL receptor tyrosine kinase [Source:HGNC Symbol;Acc:HGNC:905]	19:41219203-41261766	1.56468	1.65345	1.37254	1.56073	1.56156	1.11905	1.49711	1.42551	1.44046	232	280	212	251	266	164	215	203	205
ENSG00000167604	NFKBID	nuclear factor of kappa light polypeptide gene enhancer in B-cells inhibitor, delta [Source:HGNC Symbol;Acc:HGNC:15671]	19:35887653-35902303	1.05152	0.874981	1.2385	1.21012	1.15547	0.943147	1.33976	1.09485	1.14994	141	134	173	176	178	125	174	141	148
ENSG00000247516	MIR4458HG	MIR4458 host gene [Source:HGNC Symbol;Acc:HGNC:49008]	5:8450743-8463095	0.903182	1.34438	0.788987	0.91598	1.28145	0.794992	0.746011	1.06266	1.81612	100	170	91	110	163	87	80	113	193
ENSG00000256079	RP11-318G8.2	-	12:25435581-25436238	0	0	0	0	0	0	0	0	0	0	0	0	0	0	0	0	0	0
ENSG00000256072	RP11-335I12.2	-	12:66251745-66257434	0	0	0	0	0	0	0	0	0	0	0	0	0	0	0	0	0	0
ENSG00000256073	URB1-AS1	URB1 antisense RNA 1 (head to head) [Source:HGNC Symbol;Acc:HGNC:23128]	21:32393130-32393960	10.2554	8.47498	8.18551	8.81775	10.5315	10.9004	10.7074	9.7182	9.72435	178	168	148	166	210	187	180	162	162
ENSG00000256070	RP11-56H16.1	-	12:33454345-33455452	0	0	0	0	0	0	0	0	0	0	0	0	0	0	0	0	0	0
ENSG00000256071	RP11-465L8.1	-	12:117889454-117891008	0	0	0	0	0	0	0	0	0	0	0	0	0	0	0	0	0	0
ENSG00000256077	RP11-335O4.1	-	12:67571197-67589987	0	0	0	0	0	0	0	0	0	0	0	0	0	0	0	0	0	0
ENSG00000256075	RP11-81H14.3	-	12:68473741-68474902	0.20602	0.108219	0.118658	0.189939	0.0358534	0.125039	0.127631	0.128715	0.171698	5	3	3	5	1	3	3	3	4
ENSG00000243988	RPS24P17	ribosomal protein S24 pseudogene 17 [Source:HGNC Symbol;Acc:HGNC:36348]	16:56906534-56906956	0	0	0	0	0	0	0	0	0	0	0	0	0	0	0	0	0	0
ENSG00000243989	ACY1	aminoacylase 1 [Source:HGNC Symbol;Acc:HGNC:177]	3:51983340-51989197	7.16281	7.48772	6.77124	9.3662	9.11905	8.37109	10.243	10.309	9.48859	722	862	711	1024	1056	834	1000	998	918
ENSG00000243980	RN7SL702P	RNA, 7SL, cytoplasmic 702, pseudogene [Source:HGNC Symbol;Acc:HGNC:46718]	Y:12273473-12273764	0	0	0	0	0	0	0	0	0	0	0	0	0	0	0	0	0	0
ENSG00000243981	RP11-368M16.3	-	7:57628479-57645189	0	0	0	0	0	0	0	0	0	0	0	0	0	0	0	0	0	0
ENSG00000243986	ENO1P3	enolase 1, (alpha) pseudogene 3 [Source:HGNC Symbol;Acc:HGNC:37944]	3:124862094-124863317	0	0	0	0	0	0.0395685	0	0	0	0	0	0	0	0	1	0	0	0
ENSG00000172673	THEMIS	thymocyte selection associated [Source:HGNC Symbol;Acc:HGNC:21569]	6:127708072-127918631	0	0	0	0	0	0	0	0	0	0	0	0	0	0	0	0	0	0
ENSG00000178457	LINC00314	long intergenic non-protein coding RNA 314 [Source:HGNC Symbol;Acc:HGNC:16622]	21:28013363-28023233	0	0	0	0	0	0	0	0	0	0	0	0	0	0	0	0	0	0
ENSG00000042832	TG	thyroglobulin [Source:HGNC Symbol;Acc:HGNC:11764]	8:132866958-133134903	0.00325689	0.00285245	0	0.0090128	0	0	0	0	0	1	1	0	3	0	0	0	0	0
ENSG00000096717	SIRT1	sirtuin 1 [Source:HGNC Symbol;Acc:HGNC:14929]	10:67884669-67918390	5.53436	5.39906	5.43015	5.24816	5.37624	6.16649	5.82457	5.96936	5.58023	1086	1210	1110	1117	1212	1196	1107	1125	1051
ENSG00000216718	RP3-522P13.1	-	6:25261239-25261731	0	0	0	0	0	0	0	0	0	0	0	0	0	0	0	0	0	0
ENSG00000216713	MTND4P13	mitochondrially encoded NADH:ubiquinone oxidoreductase core subunit 4 pseudogene 13 [Source:HGNC Symbol;Acc:HGNC:42222]	6:153668879-153669901	0	0	0	0	0	0	0	0	0	0	0	0	0	0	0	0	0	0
ENSG00000178458	H3F3AP6	H3 histone, family 3A, pseudogene 6 [Source:HGNC Symbol;Acc:HGNC:42982]	4:139698144-139698554	192.56	185.125	169.417	209.862	200.87	201.067	209.637	212.26	216.885	1653	1815	1515	1954	1981	1706	1743	1750	1787
[truncated: 48,870 more rows]
